# Supplementary material for: Diversity of Cellulase-Producing Filamentous Fungi From Tibet and Transcriptomic Analysis of a Superior Cellulase Producer Trichoderma harzianum LZ117
Source: Front Microbiol. 2020 Jul 14;11:1617. doi: 10.3389/fmicb.2020.01617 (PMC7372938; doi:10.3389/fmicb.2020.01617)
Supplement: Supplementary file 4 [file Table_4.XLSX]

## Sheet: DEGs between LZ117 and K223452
DEGs between Trichoderma harzianum LZ117 and K223452
Gene ID	description	length	K223452_TPM	LZ117_TPM	Fc	log2Fc	p-value	p-adjust	significant	regulate	nr	go	KO_id	KO_name	paths	cog	cog_description	pfam	swissprot
277033	hypothetical protein	1489	3.68	29.045	5.13855	2.36136	0.00668742	0.0499281	yes	up	KKP07780.1(hypothetical protein THAR02_00168, partial [Trichoderma harzianum])	GO:0005634(cellular_component:nucleus); GO:0005829(cellular_component:cytosol); GO:0005622(cellular_component:intracellular); GO:0070273(molecular_function:phosphatidylinositol-4-phosphate binding); GO:0048193(biological_process:Golgi vesicle transport)	K15620	GOLPH3, GPP34		ENOG410XRT6(U:Intracellular trafficking, secretion, and vesicular transport)	ENOG410XRT6(Golgi phosphoprotein)	PF05719.8(GPP34:Golgi phosphoprotein 3 (GPP34))	sp|O14205|VPS74_SCHPO(Vacuolar protein sorting-associated protein 74 OS=Schizosaccharomyces pombe (strain 972 / ATCC 24843) OX=284812 GN=vps74 PE=1 SV=2)
503594	hypothetical protein	737	0.515	9.62	13.0836	3.70968	0.00661641	0.0495687	yes	up	XP_024778320.1(hypothetical protein M431DRAFT_503594 [Trichoderma harzianum CBS 226.95])	GO:0032991(cellular_component:macromolecular complex); GO:0044428(cellular_component:nuclear part)	K14968	CPS25, SDC1		ENOG410XV3G(S:Function unknown)	ENOG410XV3G(histone methylation)	PF05186.10(Dpy-30:Dpy-30 motif)	sp|Q03323|SDC1_YEAST(COMPASS component SDC1 OS=Saccharomyces cerevisiae (strain ATCC 204508 / S288c) OX=559292 GN=SDC1 PE=1 SV=1)
83094	hypothetical protein	618	5.135	37.63	5.04014	2.33346	0.00652623	0.049148	yes	up	XP_024775058.1(hypothetical protein M431DRAFT_83094 [Trichoderma harzianum CBS 226.95])	GO:0005737(cellular_component:cytoplasm); GO:0008113(molecular_function:peptide-methionine (S)-S-oxide reductase activity); GO:0005634(cellular_component:nucleus); GO:0034599(biological_process:cellular response to oxidative stress); GO:0006979(biological_process:response to oxidative stress); GO:0055114(biological_process:oxidation-reduction process); GO:0030091(biological_process:protein repair)	K07304	msrA		COG0225(O:Posttranslational modification, protein turnover, chaperones)	COG0225(Has an important function as a repair enzyme for proteins that have been inactivated by oxidation. Catalyzes the reversible oxidation-reduction of methionine sulfoxide in proteins to methionine (By similarity))	PF01625.18(PMSR:Peptide methionine sulfoxide reductase)	sp|Q09859|MSRA_SCHPO(Probable peptide methionine sulfoxide reductase OS=Schizosaccharomyces pombe (strain 972 / ATCC 24843) OX=284812 GN=mxr1 PE=3 SV=2)
129117	hypothetical protein	2463	4.105	38.85	5.98553	2.58148	0.00640574	0.0484089	yes	up	XP_024767670.1(hypothetical protein M431DRAFT_129117 [Trichoderma harzianum CBS 226.95])	GO:0000162(biological_process:tryptophan biosynthetic process); GO:0004834(molecular_function:tryptophan synthase activity)	K01694	TRP	map00260(Glycine, serine and threonine metabolism); map00400(Phenylalanine, tyrosine and tryptophan biosynthesis)	COG0133(J:Translation, ribosomal structure and biogenesis)	COG0133(50s ribosomal protein L28)	PF00290.17(Trp_syntA:Tryptophan synthase alpha chain); PF00291.22(PALP:Pyridoxal-phosphate dependent enzyme)	sp|P13228|TRP_NEUCR(Tryptophan synthase OS=Neurospora crassa (strain ATCC 24698 / 74-OR23-1A / CBS 708.71 / DSM 1257 / FGSC 987) OX=367110 GN=trp-3 PE=1 SV=1)
6750	glycoside hydrolase family 5 protein	1323	79.59	263.995	2.18801	1.12962	0.00510243	0.0482906	yes	up	XP_024772859.1(glycoside hydrolase family 5 protein [Trichoderma harzianum CBS 226.95])	GO:0016021(cellular_component:integral component of membrane); GO:0005975(biological_process:carbohydrate metabolic process); GO:0004553(molecular_function:hydrolase activity, hydrolyzing O-glycosyl compounds)	K01179	E3.2.1.4	map00500(Starch and sucrose metabolism)	COG2730(G:Carbohydrate transport and metabolism)	COG2730(Glycoside hydrolase Family 5)	PF00150.15(Cellulase:Cellulase (glycosyl hydrolase family 5))	sp|A0A024SH20|GUN2_HYPJR(Endoglucanase EG-II OS=Hypocrea jecorina (strain ATCC 56765 / BCRC 32924 / NRRL 11460 / Rut C-30) OX=1344414 GN=egl2 PE=1 SV=1)
488374	lytic polysaccharide monooxygenase	747	4.132	38.345	6.24494	2.64269	0.00458471	0.0474253	yes	up	XP_024767380.1(lytic polysaccharide monooxygenase [Trichoderma harzianum CBS 226.95])	GO:0016787(molecular_function:hydrolase activity); GO:0046872(molecular_function:metal ion binding); GO:0008810(molecular_function:cellulase activity); GO:0030245(biological_process:cellulose catabolic process); GO:0005576(cellular_component:extracellular region)				ENOG4110K71(G:Carbohydrate transport and metabolism); ENOG410YBW9(G:Carbohydrate transport and metabolism)	ENOG4110K71(Glycosyl hydrolase family 61); ENOG410YBW9(Glycosyl hydrolase family 61)	PF03443.11(Glyco_hydro_61:Glycosyl hydrolase family 61)	sp|Q7Z9M7|GUN7_HYPJQ(Endoglucanase-7 OS=Hypocrea jecorina (strain QM6a) OX=431241 GN=cel61b PE=1 SV=3)
1126	hypothetical protein	2811	10.33	42.385	2.7056	1.43595	0.00643697	0.0474147	yes	up	XP_024780881.1(hypothetical protein M431DRAFT_1126 [Trichoderma harzianum CBS 226.95])	GO:0005634(cellular_component:nucleus); GO:0006357(biological_process:regulation of transcription from RNA polymerase II promoter); GO:0008270(molecular_function:zinc ion binding); GO:0003677(molecular_function:DNA binding); GO:0045493(biological_process:xylan catabolic process); GO:0000981(molecular_function:RNA polymerase II transcription factor activity, sequence-specific DNA binding)	K21451	XLNR		ENOG410YDEK(K:Transcription); ENOG4110V1J(K:Transcription)	ENOG410YDEK(Transcriptional activator of the xylanolytic system. Involved in the induction of a variety of cellulolytic and xylanolytic enzymes in the presence of their respective substrates. Binds to the DNA sequence 5'-GGCTAAA-3'); ENOG4110V1J(Fungal_trans)	PF04082.15(Fungal_trans:Fungal specific transcription factor domain); PF00172.15(Zn_clus:Fungal Zn(2)-Cys(6) binuclear cluster domain)	sp|G4MZJ4|XLNR_MAGO7(Xylanolytic transcriptional activator xlnR homolog OS=Magnaporthe oryzae (strain 70-15 / ATCC MYA-4617 / FGSC 8958) OX=242507 GN=xlr1 PE=3 SV=1)
489459	hypothetical protein	870	2.605	20.19	5.20415	2.37966	0.00624115	0.0473301	yes	up	XP_024780362.1(hypothetical protein M431DRAFT_489459 [Trichoderma harzianum CBS 226.95])	GO:0006355(biological_process:regulation of transcription, DNA-templated); GO:0005634(cellular_component:nucleus); GO:0043189(cellular_component:H4/H2A histone acetyltransferase complex)				ENOG4111UW0(S:Function unknown); ENOG4110E7H(S:Function unknown); ENOG410ZZNX(S:Function unknown)	ENOG4111UW0(CT20 family); ENOG4110E7H(Component of the DASH complex, a microtubule-binding subcomplex of the outer kinetochore that is essential for proper chromosome segregation. The DASH complex mediates the formation and maintenance of bipolar kinetochore-microtubule attachments by forming closed rings around spindle microtubules and establishing interactions with proteins from the central kin…	PF07904.10(Eaf7:Chromatin modification-related protein EAF7)	sp|Q6CF40|EAF7_YARLI(Chromatin modification-related protein EAF7 OS=Yarrowia lipolytica (strain CLIB 122 / E 150) OX=284591 GN=EAF7 PE=3 SV=1)
492920	hypothetical protein	1563	14.445	100.29	4.35131	2.12145	0.00615845	0.0469081	yes	up	XP_024776127.1(hypothetical protein M431DRAFT_492920 [Trichoderma harzianum CBS 226.95])	GO:0006011(biological_process:UDP-glucose metabolic process); GO:0003983(molecular_function:UTP:glucose-1-phosphate uridylyltransferase activity)	K00963	UGP2, galU, galF	map00040(Pentose and glucuronate interconversions); map00052(Galactose metabolism); map00500(Starch and sucrose metabolism); map00520(Amino sugar and nucleotide sugar metabolism)	COG4284(G:Carbohydrate transport and metabolism)	COG4284(pyrophosphorylase)	PF01704.15(UDPGP:UTP--glucose-1-phosphate uridylyltransferase)	sp|P78811|UGPA1_SCHPO(Probable UTP--glucose-1-phosphate uridylyltransferase OS=Schizosaccharomyces pombe (strain 972 / ATCC 24843) OX=284812 GN=fyu1 PE=1 SV=2)
8152	hypothetical protein	1080	4.455	32.795	4.80793	2.26542	0.00596731	0.045774	yes	up	XP_024771515.1(hypothetical protein M431DRAFT_8152 [Trichoderma harzianum CBS 226.95])	GO:0005852(cellular_component:eukaryotic translation initiation factor 3 complex); GO:0016282(cellular_component:eukaryotic 43S preinitiation complex); GO:0005634(cellular_component:nucleus); GO:0033290(cellular_component:eukaryotic 48S preinitiation complex); GO:0001731(biological_process:formation of translation preinitiation complex); GO:0006413(biological_process:translational initiation); GO…	K03247	EIF3H	map03013(RNA transport)	ENOG410XSR9(J:Translation, ribosomal structure and biogenesis)	ENOG410XSR9(Component of the eukaryotic translation initiation factor 3 (eIF-3) complex, which is involved in protein synthesis and, together with other initiation factors, stimulates binding of mRNA and methionyl-tRNAi to the 40S ribosome (By similarity))	PF01398.18(JAB:JAB1/Mov34/MPN/PAD-1 ubiquitin protease)	sp|Q7S9Y9|EIF3H_NEUCR(Eukaryotic translation initiation factor 3 subunit H OS=Neurospora crassa (strain ATCC 24698 / 74-OR23-1A / CBS 708.71 / DSM 1257 / FGSC 987) OX=367110 GN=eif3h PE=3 SV=1)
113665	hypothetical protein	3126	2.715	17.05	4.06816	2.02438	0.00593796	0.0455892	yes	up	XP_024775266.1(hypothetical protein M431DRAFT_113665 [Trichoderma harzianum CBS 226.95])	GO:0006886(biological_process:intracellular protein transport); GO:0006888(biological_process:ER to Golgi vesicle-mediated transport); GO:0030127(cellular_component:COPII vesicle coat); GO:0008270(molecular_function:zinc ion binding)	K14007	SEC24	map04141(Protein processing in endoplasmic reticulum)	COG5028(U:Intracellular trafficking, secretion, and vesicular transport)	COG5028(SEC24 family, member)	PF04811.12(Sec23_trunk:Sec23/Sec24 trunk domain); PF04815.12(Sec23_helical:Sec23/Sec24 helical domain); PF08033.9(Sec23_BS:Sec23/Sec24 beta-sandwich domain); PF04810.12(zf-Sec23_Sec24:Sec23/Sec24 zinc finger); PF00626.19(Gelsolin:Gelsolin repeat)	sp|Q9USS7|YNB3_SCHPO(Uncharacterized protein C4.03c OS=Schizosaccharomyces pombe (strain 972 / ATCC 24843) OX=284812 GN=SPBC4.03c PE=2 SV=1)
6117	hypothetical protein	4533	25.635	135.255	4.5236	2.17747	0.00578276	0.0446119	yes	up	XP_024773513.1(hypothetical protein M431DRAFT_6117 [Trichoderma harzianum CBS 226.95])	GO:0006457(biological_process:protein folding); GO:0008641(molecular_function:small protein activating enzyme activity); GO:0006464(biological_process:cellular protein modification process); GO:0005524(molecular_function:ATP binding)	K03178	UBE1, UBA1	map04120(Ubiquitin mediated proteolysis)	COG0476(S:Function unknown)	COG0476(Positively regulates the activity of the minus-end directed microtubule motor protein dynein. May enhance dynein- mediated microtubule sliding by targeting dynein to the microtubule plus end. Required for)	PF00899.18(ThiF:ThiF family); PF10585.6(UBA_e1_thiolCys:Ubiquitin-activating enzyme active site); PF16190.2(E1_FCCH:Ubiquitin-activating enzyme E1 FCCH domain); PF09358.7(E1_UFD:Ubiquitin fold domain); PF16191.2(E1_4HB:Ubiquitin-activating enzyme E1 four-helix bundle); PF13409.3(GST_N_2:Glutathione S-transferase, N-terminal domain); PF00254.25(FKBP_C:FKBP-type peptidyl-prolyl cis-trans isomerase)…	sp|P52495|UBA1_CANAW(Ubiquitin-activating enzyme E1 1 OS=Candida albicans (strain WO-1) OX=294748 GN=UBA1 PE=3 SV=2)
503153	hypothetical protein	2020	0.215	2.865	8.96441	3.16421	0.00574924	0.0444157	yes	up	XP_024780652.1(hypothetical protein M431DRAFT_503153 [Trichoderma harzianum CBS 226.95])	GO:0005215(molecular_function:transporter activity); GO:0016021(cellular_component:integral component of membrane); GO:0004396(molecular_function:hexokinase activity); GO:0005623(cellular_component:cell); GO:0055085(biological_process:transmembrane transport); GO:0046835(biological_process:carbohydrate phosphorylation); GO:0001678(biological_process:cellular glucose homeostasis); GO:0006096(biolo…				ENOG410XNQK(S:Function unknown); COG5026(G:Carbohydrate transport and metabolism)	ENOG410XNQK(Conserved hypothetical, protein); COG5026(hexokinase)	PF03727.13(Hexokinase_2:Hexokinase); PF00349.18(Hexokinase_1:Hexokinase)	sp|Q4U3Y2|HXK1_ASPFU(Hexokinase-1 OS=Neosartorya fumigata (strain ATCC MYA-4609 / Af293 / CBS 101355 / FGSC A1100) OX=330879 GN=hxkA PE=2 SV=1)
512290	hypothetical protein	1320	0.94	8.71	6.18203	2.62808	0.00568318	0.0440624	yes	up	XP_024769745.1(hypothetical protein M431DRAFT_512290 [Trichoderma harzianum CBS 226.95])					ENOG4110X0I(S:Function unknown)	ENOG4110X0I(-)	PF16804.2(DUF5071:Domain of unknown function (DUF5071))
88951	hypothetical protein	792	0	87.81	1579.72	10.6255	0.00565746	0.0439023	yes	up	XP_024772909.1(hypothetical protein M431DRAFT_88951 [Trichoderma harzianum CBS 226.95])					ENOG4110W4Y(S:Function unknown); ENOG410YTT2(S:Function unknown); ENOG410YT5F(S:Function unknown)	ENOG4110W4Y(Kp4); ENOG410YTT2(Kp4); ENOG410YT5F(Kp4)	PF09044.7(Kp4:Kp4)	sp|Q90121|KP4T_UMV4(KP4 killer toxin OS=Ustilago maydis P4 virus OX=11009 GN=M2A PE=1 SV=1)
71613	glycoside hydrolase family 3 protein	2235	19.542	55.532	2.00354	1.00255	0.004566	0.0437653	yes	up	XP_024779734.1(glycoside hydrolase family 3 protein [Trichoderma harzianum CBS 226.95])	GO:0005975(biological_process:carbohydrate metabolic process); GO:0004553(molecular_function:hydrolase activity, hydrolyzing O-glycosyl compounds)	K05349	bglX	map00460(Cyanoamino acid metabolism); map00500(Starch and sucrose metabolism)	COG1472(Q:Secondary metabolites biosynthesis, transport and catabolism)	COG1472(synthase)	PF01915.19(Glyco_hydro_3_C:Glycosyl hydrolase family 3 C-terminal domain); PF00933.18(Glyco_hydro_3:Glycosyl hydrolase family 3 N terminal domain); PF14310.3(Fn3-like:Fibronectin type III-like domain)	sp|G4NI45|CEL3A_MAGO7(Beta-glucosidase cel3A OS=Magnaporthe oryzae (strain 70-15 / ATCC MYA-4617 / FGSC 8958) OX=242507 GN=cel3A PE=1 SV=1)
500010	hypothetical protein	1164	2.61	21.135	5.26269	2.3958	0.00557961	0.0434148	yes	up	XP_024769203.1(hypothetical protein M431DRAFT_500010 [Trichoderma harzianum CBS 226.95])	GO:0005737(cellular_component:cytoplasm); GO:0006437(biological_process:tyrosyl-tRNA aminoacylation); GO:0005634(cellular_component:nucleus); GO:0004831(molecular_function:tyrosine-tRNA ligase activity); GO:0005524(molecular_function:ATP binding)	K01866	YARS, tyrS	map00970(Aminoacyl-tRNA biosynthesis)	COG0162(J:Translation, ribosomal structure and biogenesis)	COG0162(Catalyzes the attachment of tyrosine to tRNA(Tyr) in a two-step reaction tyrosine is first activated by ATP to form Tyr- AMP and then transferred to the acceptor end of tRNA(Tyr) (By similarity))	PF00579.22(tRNA-synt_1b:tRNA synthetases class I (W and Y))	sp|P36421|SYYC_YEAST(Tyrosine--tRNA ligase, cytoplasmic OS=Saccharomyces cerevisiae (strain ATCC 204508 / S288c) OX=559292 GN=TYS1 PE=1 SV=3)
358912	hypothetical protein	1296	8.87	70.315	5.19959	2.3784	0.00551073	0.043111	yes	up	XP_024777813.1(hypothetical protein M431DRAFT_358912 [Trichoderma harzianum CBS 226.95])	GO:0003723(molecular_function:RNA binding); GO:0005730(cellular_component:nucleolus)	K02863	RP-L1, MRPL1, rplA	map03010(Ribosome)	COG0081(J:Translation, ribosomal structure and biogenesis)	COG0081(Binds directly to 23S rRNA. The L1 stalk is quite mobile in the ribosome, and is involved in E site tRNA release (By similarity))	PF00687.18(Ribosomal_L1:Ribosomal protein L1p/L10e family)	sp|Q6FF93|RL1_ACIAD(50S ribosomal protein L1 OS=Acinetobacter baylyi (strain ATCC 33305 / BD413 / ADP1) OX=62977 GN=rplA PE=3 SV=1)
518159	hypothetical protein	1814	9.495	71.605	4.73278	2.24269	0.00549922	0.0430752	yes	up	XP_024776079.1(hypothetical protein M431DRAFT_518159 [Trichoderma harzianum CBS 226.95])	GO:0005737(cellular_component:cytoplasm); GO:0006457(biological_process:protein folding); GO:0005634(cellular_component:nucleus); GO:0051082(molecular_function:unfolded protein binding); GO:0005832(cellular_component:chaperonin-containing T-complex); GO:0005524(molecular_function:ATP binding)	K09496	CCT4		COG0459(S:Function unknown)	COG0459(-)	PF00118.21(Cpn60_TCP1:TCP-1/cpn60 chaperonin family)	sp|P50999|TCPD_SCHPO(T-complex protein 1 subunit delta OS=Schizosaccharomyces pombe (strain 972 / ATCC 24843) OX=284812 GN=cct4 PE=2 SV=2)
506953	hypothetical protein	1830	8.545	57.19	4.24272	2.08499	0.00550118	0.0430752	yes	up	XP_024774957.1(hypothetical protein M431DRAFT_506953 [Trichoderma harzianum CBS 226.95])	GO:0044424(cellular_component:intracellular part); GO:0009892(biological_process:negative regulation of metabolic process); GO:0044763(biological_process:single-organism cellular process); GO:0048522(biological_process:positive regulation of cellular process)				COG0517(U:Intracellular trafficking, secretion, and vesicular transport)	COG0517(Component of oligomeric Golgi complex 6)	PF00571.25(CBS:CBS domain)	sp|Q2HHB4|SDS23_CHAGB(Protein SDS23 OS=Chaetomium globosum (strain ATCC 6205 / CBS 148.51 / DSM 1962 / NBRC 6347 / NRRL 1970) OX=306901 GN=SDS23 PE=3 SV=1)
487678	hypothetical protein	1473	10.665	77.995	4.41864	2.1436	0.00546894	0.0429002	yes	up	XP_024768114.1(hypothetical protein M431DRAFT_487678 [Trichoderma harzianum CBS 226.95])	GO:0005215(molecular_function:transporter activity); GO:0016021(cellular_component:integral component of membrane); GO:0055085(biological_process:transmembrane transport)				COG1457(L:Replication, recombination and repair)	COG1457(helicase)	PF02133.12(Transp_cyt_pur:Permease for cytosine/purines, uracil, thiamine, allantoin)	sp|C8V329|FCY2_EMENI(Purine-cytosine permease fcyB OS=Emericella nidulans (strain FGSC A4 / ATCC 38163 / CBS 112.46 / NRRL 194 / M139) OX=227321 GN=fcyB PE=1 SV=1)
513492	carbohydrate-binding module family 42 protein	1858	0.115	0.34	2.16322	1.11318	0.0046416	0.0428145	yes	up	XP_024768394.1(carbohydrate-binding module family 42 protein [Trichoderma harzianum CBS 226.95])	GO:0046556(molecular_function:alpha-L-arabinofuranosidase activity); GO:0046373(biological_process:L-arabinose metabolic process); GO:0005576(cellular_component:extracellular region); GO:0031222(biological_process:arabinan catabolic process); GO:0045493(biological_process:xylan catabolic process); GO:0031221(biological_process:arabinan metabolic process); GO:0009044(molecular_function:xylan 1,4-b…	K20844	abf1	map00520(Amino sugar and nucleotide sugar metabolism)	ENOG410XSPY(G:Carbohydrate transport and metabolism)	ENOG410XSPY(Alpha-N-arabinofuranosidase involved in the degradation of arabinoxylan, a major component of plant hemicellulose. Able to hydrolyze 1,5-, 1,3- and 1,2-alpha-linkages not only in L- arabinofuranosyl oligosaccharides, but also in polysaccharides containing terminal non-reducing L-arabinofuranoses in side chains, like L-arabinan, arabinogalactan and arabinoxylan)	PF09206.8(ArabFuran-catal:Alpha-L-arabinofuranosidase B, catalytic); PF05270.10(AbfB:Alpha-L-arabinofuranosidase B (ABFB) domain)	sp|Q92455|ABF1_HYPJE(Alpha-L-arabinofuranosidase OS=Hypocrea jecorina OX=51453 GN=abf1 PE=2 SV=1)
8857	hypothetical protein	3963	1.77	13.33	4.71835	2.23828	0.00543585	0.0426793	yes	up	XP_024770482.1(hypothetical protein M431DRAFT_8857 [Trichoderma harzianum CBS 226.95])	GO:0035091(molecular_function:phosphatidylinositol binding)				ENOG4110ZFR(S:Function unknown)	ENOG4110ZFR((VPS9) domain protein)	PF02204.15(VPS9:Vacuolar sorting protein 9 (VPS9) domain); PF13857.3(Ank_5:Ankyrin repeats (many copies)); PF12796.4(Ank_2:Ankyrin repeats (3 copies)); PF13637.3(Ank_4:Ankyrin repeats (many copies))	sp|Q6C5F1|U507_YARLI(UPF0507 protein YALI0E18612g OS=Yarrowia lipolytica (strain CLIB 122 / E 150) OX=284591 GN=YALI0E18612g PE=3 SV=1)
441083	glycoside hydrolase family 5 protein	1846	2.235	26.305	7.48571	2.90414	0.00454742	0.0425325	yes	up	XP_024773252.1(glycoside hydrolase family 5 protein [Trichoderma harzianum CBS 226.95])	GO:0030248(molecular_function:cellulose binding); GO:0005975(biological_process:carbohydrate metabolic process); GO:0008810(molecular_function:cellulase activity); GO:0030245(biological_process:cellulose catabolic process); GO:0005576(cellular_component:extracellular region); GO:0004553(molecular_function:hydrolase activity, hydrolyzing O-glycosyl compounds)	K01179	E3.2.1.4	map00500(Starch and sucrose metabolism)	COG2730(G:Carbohydrate transport and metabolism)	COG2730(Glycoside hydrolase Family 5)	PF00150.15(Cellulase:Cellulase (glycosyl hydrolase family 5)); PF00734.15(CBM_1:Fungal cellulose binding domain)	sp|A0A024SH20|GUN2_HYPJR(Endoglucanase EG-II OS=Hypocrea jecorina (strain ATCC 56765 / BCRC 32924 / NRRL 11460 / Rut C-30) OX=1344414 GN=egl2 PE=1 SV=1)
76852	hypothetical protein	393	129.545	749.185	4.38491	2.13255	0.00540816	0.0425004	yes	up	XP_013949468.1(hypothetical protein TRIVIDRAFT_217184 [Trichoderma virens Gv29-8])	GO:0001193(biological_process:maintenance of transcriptional fidelity during DNA-templated transcription elongation from RNA polymerase II promoter); GO:0006283(biological_process:transcription-coupled nucleotide-excision repair); GO:0005730(cellular_component:nucleolus); GO:0005829(cellular_component:cytosol); GO:0001172(biological_process:transcription, RNA-templated); GO:0005665(cellular_compo…	K03017	RPB9, POLR2I	map00230(Purine metabolism); map00240(Pyrimidine metabolism); map03020(RNA polymerase)	COG1594(O:Posttranslational modification, protein turnover, chaperones)	COG1594(peptidyl-prolyl cis-trans isomerase)	PF01096.15(TFIIS_C:Transcription factor S-II (TFIIS)); PF02150.13(RNA_POL_M_15KD:RNA polymerases M/15 Kd subunit)	sp|P27999|RPB9_YEAST(DNA-directed RNA polymerase II subunit RPB9 OS=Saccharomyces cerevisiae (strain ATCC 204508 / S288c) OX=559292 GN=RPB9 PE=1 SV=1)
7497	carbohydrate-binding module family 1 protein	1518	4.352	37.523	5.82503	2.54227	0.00449776	0.0424552	yes	up	XP_024771708.1(carbohydrate-binding module family 1 protein [Trichoderma harzianum CBS 226.95])	GO:0016162(molecular_function:cellulose 1,4-beta-cellobiosidase activity); GO:0030248(molecular_function:cellulose binding); GO:0004553(molecular_function:hydrolase activity, hydrolyzing O-glycosyl compounds); GO:0030245(biological_process:cellulose catabolic process); GO:0005576(cellular_component:extracellular region)	K01225	CBH1	map00500(Starch and sucrose metabolism)	ENOG41101KD(G:Carbohydrate transport and metabolism); ENOG410YA5Z(G:Carbohydrate transport and metabolism)	ENOG41101KD(The biological conversion of cellulose to glucose generally requires three types of hydrolytic enzymes (1) Endoglucanases which cut internal beta-1,4-glucosidic bonds); ENOG410YA5Z(Glycosyl hydrolase family 7)	PF00840.17(Glyco_hydro_7:Glycosyl hydrolase family 7); PF00734.15(CBM_1:Fungal cellulose binding domain)	sp|Q9P8P3|GUX1_TRIHA(Exoglucanase 1 OS=Trichoderma harzianum OX=5544 GN=cbh1 PE=1 SV=1)
537403	hypothetical protein	718	13.48	103.135	4.8486	2.27757	0.00529239	0.0417041	yes	up	XP_024780200.1(hypothetical protein M431DRAFT_537403 [Trichoderma harzianum CBS 226.95])	GO:0005622(cellular_component:intracellular); GO:0007264(biological_process:small GTPase mediated signal transduction); GO:0005525(molecular_function:GTP binding)	K04392	RAC1	map04145(Phagosome); map04933(AGE-RAGE signaling pathway in diabetic complications)	COG1100(S:Function unknown)	COG1100(RNA binding protein)	PF00071.19(Ras:Ras family); PF08477.10(Roc:Ras of Complex, Roc, domain of DAPkinase); PF00025.18(Arf:ADP-ribosylation factor family)	sp|P34146|RAC1C_DICDI(Rho-related protein rac1C OS=Dictyostelium discoideum OX=44689 GN=rac1C PE=1 SV=2)
217221	hypothetical protein	1681	3.27	24.025	4.69857	2.23222	0.00525347	0.041488	yes	up	XP_024772100.1(hypothetical protein M431DRAFT_217221 [Trichoderma harzianum CBS 226.95])	GO:0016021(cellular_component:integral component of membrane); GO:0005783(cellular_component:endoplasmic reticulum)	K04709	LAG1	map00600(Sphingolipid metabolism)	COG5058(U:Intracellular trafficking, secretion, and vesicular transport)	COG5058(ceramide synthase)	PF03798.13(TRAM_LAG1_CLN8:TLC domain); PF08390.8(TRAM1:TRAM1-like protein)	sp|Q8J2Q2|FUM18_GIBM7(Sphingosine N-acyltransferase-like protein FUM18 OS=Gibberella moniliformis (strain M3125 / FGSC 7600) OX=334819 GN=FUM18 PE=3 SV=1)
112315	hypothetical protein	2006	2.795	20.775	4.77959	2.25689	0.00517424	0.0409591	yes	up	XP_024776573.1(hypothetical protein M431DRAFT_112315 [Trichoderma harzianum CBS 226.95])	GO:0005634(cellular_component:nucleus); GO:0000162(biological_process:tryptophan biosynthetic process); GO:0005829(cellular_component:cytosol); GO:0004049(molecular_function:anthranilate synthase activity)	K01657	trpE	map00400(Phenylalanine, tyrosine and tryptophan biosynthesis)	COG0147(S:Function unknown)	COG0147(-)	PF00425.15(Chorismate_bind:chorismate binding enzyme); PF04715.10(Anth_synt_I_N:Anthranilate synthase component I, N terminal region)	sp|P00899|TRPE_YEAST(Anthranilate synthase component 1 OS=Saccharomyces cerevisiae (strain ATCC 204508 / S288c) OX=559292 GN=TRP2 PE=1 SV=4)
482254	hypothetical protein	2979	1.6	11.43	4.56861	2.19175	0.00512914	0.040751	yes	up	XP_024774781.1(hypothetical protein M431DRAFT_482254 [Trichoderma harzianum CBS 226.95])	GO:0005829(cellular_component:cytosol); GO:0032153(cellular_component:cell division site); GO:0005739(cellular_component:mitochondrion); GO:0030010(biological_process:establishment of cell polarity)				ENOG4111D8F(S:Function unknown)	ENOG4111D8F(morphogenesis protein)	PF08101.8(DUF1708:Domain of unknown function (DUF1708))	sp|P21339|MSB1_YEAST(Morphogenesis-related protein MSB1 OS=Saccharomyces cerevisiae (strain ATCC 204508 / S288c) OX=559292 GN=MSB1 PE=1 SV=1)
84820	hypothetical protein	1389	14.795	89.08	4.07752	2.02769	0.00509827	0.0405802	yes	up	XP_024774531.1(hypothetical protein M431DRAFT_84820 [Trichoderma harzianum CBS 226.95])	GO:0035091(molecular_function:phosphatidylinositol binding)	K17919	SNX4	map04144(Endocytosis)	COG5391(E:Amino acid transport and metabolism)	COG5391(Alpha-keto-beta-hydroxylacyl reductoisomerase)	PF00787.21(PX:PX domain); PF09325.7(Vps5:Vps5 C terminal like); PF03114.15(BAR:BAR domain)	sp|I1RXT2|SNX4_GIBZE(Sorting nexin-4 OS=Gibberella zeae (strain PH-1 / ATCC MYA-4620 / FGSC 9075 / NRRL 31084) OX=229533 GN=ATG24 PE=3 SV=1)
501166	hypothetical protein	555	12.15	116.25	6.12753	2.61531	0.00508695	0.0405273	yes	up	XP_024768137.1(hypothetical protein M431DRAFT_501166 [Trichoderma harzianum CBS 226.95])					ENOG410YNB6(S:Function unknown); ENOG410YISQ(S:Function unknown)	ENOG410YNB6(-); ENOG410YISQ(cell wall protein PhiA)		sp|B0Y004|PHIA_ASPFC(Cell wall protein phiA OS=Neosartorya fumigata (strain CEA10 / CBS 144.89 / FGSC A1163) OX=451804 GN=phiA PE=3 SV=1)
226821	hypothetical protein	848	6.385	47.925	4.93506	2.30307	0.00496371	0.0396914	yes	up	XP_024771456.1(hypothetical protein M431DRAFT_226821 [Trichoderma harzianum CBS 226.95])
145281	hypothetical protein	3788	7	50.03	4.54689	2.18488	0.00492713	0.0394717	yes	up	XP_024773847.1(hypothetical protein M431DRAFT_145281 [Trichoderma harzianum CBS 226.95])	GO:0005794(cellular_component:Golgi apparatus); GO:1902358(biological_process:sulfate transmembrane transport); GO:0000324(cellular_component:fungal-type vacuole); GO:0005783(cellular_component:endoplasmic reticulum); GO:0016021(cellular_component:integral component of membrane); GO:0000329(cellular_component:fungal-type vacuole membrane); GO:0008271(molecular_function:secondary active sulfate tr…	K03321	TC.SULP		COG0659(S:Function unknown)	COG0659(Conserved hypothetical, protein)	PF00916.17(Sulfate_transp:Sulfate permease family); PF00027.26(cNMP_binding:Cyclic nucleotide-binding domain); PF01740.18(STAS:STAS domain)	sp|Q09764|YA7B_SCHPO(Uncharacterized protein C24H6.11c OS=Schizosaccharomyces pombe (strain 972 / ATCC 24843) OX=284812 GN=SPAC24H6.11c PE=4 SV=1)
508491	hypothetical protein	870	8.115	62.09	4.99941	2.32176	0.00488937	0.0394545	yes	up	XP_024774755.1(hypothetical protein M431DRAFT_508491 [Trichoderma harzianum CBS 226.95])	GO:0030473(biological_process:nuclear migration along microtubule); GO:0030029(biological_process:actin filament-based process); GO:0007017(biological_process:microtubule-based process); GO:0005643(cellular_component:nuclear pore); GO:0005777(cellular_component:peroxisome); GO:0051292(biological_process:nuclear pore complex assembly); GO:0005881(cellular_component:cytoplasmic microtubule); GO:004…	K10418	DYNLL		ENOG4111NK2(S:Function unknown)	ENOG4111NK2(dynein, light chain)	PF01221.15(Dynein_light:Dynein light chain type 1)	sp|O94111|DYL1_EMENI(Dynein light chain, cytoplasmic OS=Emericella nidulans (strain FGSC A4 / ATCC 38163 / CBS 112.46 / NRRL 194 / M139) OX=227321 GN=nudG PE=3 SV=1)
309334	hypothetical protein	730	282.535	1750.99	4.32023	2.11111	0.00489568	0.0394545	yes	up	XP_024779295.1(hypothetical protein M431DRAFT_309334 [Trichoderma harzianum CBS 226.95])					ENOG4111W5U(S:Function unknown)	ENOG4111W5U(RNA binding protein)	PF01172.15(SBDS:Shwachman-Bodian-Diamond syndrome (SBDS) protein)	sp|Q9P7K6|SDO1L_SCHPO(SDO1-like protein C21C3.19 OS=Schizosaccharomyces pombe (strain 972 / ATCC 24843) OX=284812 GN=SPBC21C3.19 PE=3 SV=1)
75619	hypothetical protein	675	22.76	145.865	4.22586	2.07925	0.00489452	0.0394545	yes	up	XP_024779055.1(hypothetical protein M431DRAFT_75619 [Trichoderma harzianum CBS 226.95])	GO:0007120(biological_process:axial cellular bud site selection); GO:0007121(biological_process:bipolar cellular bud site selection); GO:0005829(cellular_component:cytosol); GO:0003400(biological_process:regulation of COPII vesicle coating); GO:0005509(molecular_function:calcium ion binding); GO:0005935(cellular_component:cellular bud neck); GO:0008270(molecular_function:zinc ion binding)				ENOG410YKQK(S:Function unknown)	ENOG410YKQK(grancalcin, EF-hand calcium binding protein)	PF00036.29(EF-hand_1:EF hand); PF13405.3(EF-hand_6:EF-hand domain); PF13499.3(EF-hand_7:EF-hand domain pair); PF13202.3(EF-hand_5:EF hand); PF13833.3(EF-hand_8:EF-hand domain pair)	sp|P12815|PDCD6_MOUSE(Programmed cell death protein 6 OS=Mus musculus OX=10090 GN=Pdcd6 PE=1 SV=2)
508977	hypothetical protein	1940	10.83	66.945	4.20675	2.0727	0.00488395	0.0394545	yes	up	XP_024773609.1(hypothetical protein M431DRAFT_508977 [Trichoderma harzianum CBS 226.95])					ENOG410Z2EF(S:Function unknown)	ENOG410Z2EF(-)
3182	hypothetical protein	1401	26.765	162.425	4.03988	2.01431	0.00491582	0.0394545	yes	up	XP_024777862.1(hypothetical protein M431DRAFT_3182 [Trichoderma harzianum CBS 226.95])	GO:0006461(biological_process:protein complex assembly); GO:0044763(biological_process:single-organism cellular process); GO:0005515(molecular_function:protein binding)	K12795	SUGT1, SGT1		COG5091(S:Function unknown)	COG5091(Suppressor of g2 allele of skp1)	PF05002.12(SGS:SGS domain); PF04969.13(CS:CS domain)	sp|Q0JL44|SGT1_ORYSJ(Protein SGT1 homolog OS=Oryza sativa subsp. japonica OX=39947 GN=SGT1 PE=1 SV=1)
13658	hypothetical protein	1383	152.06	926.315	4.0209	2.00752	0.00488484	0.0394545	yes	up	XP_024779019.1(hypothetical protein M431DRAFT_13658 [Trichoderma harzianum CBS 226.95])					ENOG41115EN(S:Function unknown); ENOG410ZDMK(S:Function unknown)	ENOG41115EN(Pfam:Drmip_Hesp); ENOG410ZDMK(serine-threonine rich protein)	PF10342.6(GPI-anchored:Ser-Thr-rich glycosyl-phosphatidyl-inositol-anchored membrane family)
479650	hypothetical protein	1902	8.42	56.41	4.37805	2.13029	0.00479275	0.039008	yes	up	XP_024777812.1(hypothetical protein M431DRAFT_479650 [Trichoderma harzianum CBS 226.95])	GO:0005737(cellular_component:cytoplasm); GO:0017102(cellular_component:methionyl glutamyl tRNA synthetase complex); GO:0006424(biological_process:glutamyl-tRNA aminoacylation); GO:0004818(molecular_function:glutamate-tRNA ligase activity); GO:0005829(cellular_component:cytosol); GO:0005739(cellular_component:mitochondrion); GO:0005634(cellular_component:nucleus); GO:0005524(molecular_function:AT…	K01885	EARS, gltX	map00860(Porphyrin and chlorophyll metabolism); map00970(Aminoacyl-tRNA biosynthesis)	COG0008(J:Translation, ribosomal structure and biogenesis)	COG0008(Catalyzes the attachment of glutamate to tRNA(Glu) in a two-step reaction glutamate is first activated by ATP to form Glu-AMP and then transferred to the acceptor end of tRNA(Glu) (By similarity))	PF00749.18(tRNA-synt_1c:tRNA synthetases class I (E and Q), catalytic domain); PF03950.15(tRNA-synt_1c_C:tRNA synthetases class I (E and Q), anti-codon binding domain)	sp|O13775|SYEC_SCHPO(Probable glutamate--tRNA ligase, cytoplasmic OS=Schizosaccharomyces pombe (strain 972 / ATCC 24843) OX=284812 GN=gus1 PE=1 SV=1)
293196	hypothetical protein	1668	260.22	1699.16	4.43619	2.14932	0.00475254	0.0387838	yes	up	XP_024778696.1(hypothetical protein M431DRAFT_293196 [Trichoderma harzianum CBS 226.95])	GO:0004674(molecular_function:protein serine/threonine kinase activity); GO:0006468(biological_process:protein phosphorylation); GO:0005524(molecular_function:ATP binding)	K08794	CAMK1		ENOG410XRMJ(S:Function unknown)	ENOG410XRMJ(-)	PF00069.22(Pkinase:Protein kinase domain); PF07714.14(Pkinase_Tyr:Protein tyrosine kinase); PF14531.3(Kinase-like:Kinase-like)	sp|O14408|KCC1_METAN(Calcium/calmodulin-dependent protein kinase OS=Metarhizium anisopliae OX=5530 PE=2 SV=1)
495788	hypothetical protein	2286	4.995	33.635	4.38493	2.13255	0.00474244	0.0387441	yes	up	XP_024773514.1(hypothetical protein M431DRAFT_495788 [Trichoderma harzianum CBS 226.95])					ENOG4111VZG(S:Function unknown); ENOG4110VYI(S:Function unknown)	ENOG4111VZG(Conserved hypothetical, protein); ENOG4110VYI(-)
17265	hypothetical protein	499	109.97	651.36	4.16162	2.05714	0.00472424	0.0387048	yes	up	XP_024773476.1(hypothetical protein M431DRAFT_17265 [Trichoderma harzianum CBS 226.95])	GO:0016021(cellular_component:integral component of membrane)				ENOG410Y85J(S:Function unknown)	ENOG410Y85J(Ubiquinol-cytochrome-c reductase complex subunit (QCR10))	PF09796.6(QCR10:Ubiquinol-cytochrome-c reductase complex subunit (QCR10))
284242	hypothetical protein	493	29.905	184.895	4.26824	2.09364	0.00471232	0.0386803	yes	up	XP_024778381.1(hypothetical protein M431DRAFT_284242 [Trichoderma harzianum CBS 226.95])		K18172	CMC2		ENOG410XXRM(S:Function unknown); ENOG410Y3XU(S:Function unknown)	ENOG410XXRM(Cytochrome c oxidase biogenesis protein Cmc1 like); ENOG410Y3XU(Conserved hypothetical, protein)	PF08583.7(Cmc1:Cytochrome c oxidase biogenesis protein Cmc1 like)
492847	hypothetical protein	2172	30.765	163.545	5.68122	2.5062	0.00470081	0.0386224	yes	up	XP_024776060.1(hypothetical protein M431DRAFT_492847 [Trichoderma harzianum CBS 226.95])					ENOG410XZ6E(S:Function unknown)	ENOG410XZ6E(embryo development ending in birth or egg hatching)		sp|D4B1B1|ALS1_ARTBC(Agglutinin-like protein ARB_02240 OS=Arthroderma benhamiae (strain ATCC MYA-4681 / CBS 112371) OX=663331 GN=ARB_02240 PE=1 SV=1)
6025	hypothetical protein	750	0	3.72	71.696	6.16382	0.00464963	0.0383473	yes	up	XP_024773407.1(hypothetical protein M431DRAFT_6025 [Trichoderma harzianum CBS 226.95])					ENOG410YHE9(S:Function unknown)	ENOG410YHE9(Conserved hypothetical, protein)
149711	hypothetical protein	1990	6.995	46.48	4.66681	2.22244	0.00462619	0.0382267	yes	up	XP_024770709.1(hypothetical protein M431DRAFT_149711 [Trichoderma harzianum CBS 226.95])	GO:0051287(molecular_function:NAD binding); GO:0006564(biological_process:L-serine biosynthetic process); GO:0004617(molecular_function:phosphoglycerate dehydrogenase activity); GO:0055114(biological_process:oxidation-reduction process); GO:0016597(molecular_function:amino acid binding)	K00058	serA, PHGDH	map00260(Glycine, serine and threonine metabolism); map00680(Methane metabolism)	COG0111(S:Function unknown)	COG0111(-)	PF02826.16(2-Hacid_dh_C:D-isomer specific 2-hydroxyacid dehydrogenase, NAD binding domain); PF00389.27(2-Hacid_dh:D-isomer specific 2-hydroxyacid dehydrogenase, catalytic domain); PF03446.12(NAD_binding_2:NAD binding domain of 6-phosphogluconate dehydrogenase)	sp|P40510|SER33_YEAST(D-3-phosphoglycerate dehydrogenase 2 OS=Saccharomyces cerevisiae (strain ATCC 204508 / S288c) OX=559292 GN=SER33 PE=1 SV=1)
508289	hypothetical protein	2614	3.065	23.37	4.57852	2.19488	0.00460116	0.038129	yes	up	PKK52074.1(hypothetical protein CI102_2612 [Trichoderma harzianum])	GO:0003847(molecular_function:1-alkyl-2-acetylglycerophosphocholine esterase activity); GO:0016042(biological_process:lipid catabolic process)	K01062	PLA2G7, PAFAH	map00565(Ether lipid metabolism)	ENOG4111FH0(S:Function unknown)	ENOG4111FH0(-)	PF03403.10(PAF-AH_p_II:Platelet-activating factor acetylhydrolase, isoform II); PF12740.4(Chlorophyllase2:Chlorophyllase enzyme); PF07224.8(Chlorophyllase:Chlorophyllase)	sp|Q99487|PAFA2_HUMAN(Platelet-activating factor acetylhydrolase 2, cytoplasmic OS=Homo sapiens OX=9606 GN=PAFAH2 PE=1 SV=1)
9195	glycosyltransferase family 39 protein	2223	23.04	153.56	4.206	2.07245	0.00458371	0.0380571	yes	up	XP_024770188.1(glycosyltransferase family 39 protein [Trichoderma harzianum CBS 226.95])	GO:0006493(biological_process:protein O-linked glycosylation); GO:0016021(cellular_component:integral component of membrane); GO:0004169(molecular_function:dolichyl-phosphate-mannose-protein mannosyltransferase activity); GO:0097502(biological_process:mannosylation); GO:0005789(cellular_component:endoplasmic reticulum membrane); GO:0035269(biological_process:protein O-linked mannosylation); GO:00…	K00728	POMT, pmt	map00514(Other types of O-glycan biosynthesis)	COG1928(S:Function unknown)	COG1928(WD domain, G-beta repeat)	PF02366.15(PMT:Dolichyl-phosphate-mannose-protein mannosyltransferase); PF16192.2(PMT_4TMC:C-terminal four TMM region of protein-O-mannosyltransferase); PF02815.16(MIR:MIR domain)	sp|Q5ADM9|PMT2_CANAL(Dolichyl-phosphate-mannose--protein mannosyltransferase 2 OS=Candida albicans (strain SC5314 / ATCC MYA-2876) OX=237561 GN=PMT2 PE=1 SV=1)
20750	hypothetical protein	798	5.39	40.48	4.89901	2.29249	0.00457728	0.0380401	yes	up	XP_024769002.1(hypothetical protein M431DRAFT_20750 [Trichoderma harzianum CBS 226.95])	GO:1901006(biological_process:ubiquinone-6 biosynthetic process); GO:0009060(biological_process:aerobic respiration); GO:0005739(cellular_component:mitochondrion); GO:0006744(biological_process:ubiquinone biosynthetic process); GO:0005743(cellular_component:mitochondrial inner membrane)	K18587	COQ9		COG5590(S:Function unknown)	COG5590(ubiquinone biosynthesis protein Coq9)	PF08511.8(COQ9:COQ9)	sp|O13850|COQ9_SCHPO(Ubiquinone biosynthesis protein coq9, mitochondrial OS=Schizosaccharomyces pombe (strain 972 / ATCC 24843) OX=284812 GN=coq9 PE=3 SV=1)
312423	hypothetical protein	1130	2.675	22.98	5.43586	2.44251	0.00454819	0.0379139	yes	up	XP_024779381.1(hypothetical protein M431DRAFT_312423 [Trichoderma harzianum CBS 226.95])	GO:0008171(molecular_function:O-methyltransferase activity); GO:0032259(biological_process:methylation)	K00545	COMT	map00350(Tyrosine metabolism)	COG4122(K:Transcription)	COG4122(domain protein)	PF01596.14(Methyltransf_3:O-methyltransferase); PF13578.3(Methyltransf_24:Methyltransferase domain)	sp|Q8NKC1|COMT2_SCHPO(Probable catechol O-methyltransferase 2 OS=Schizosaccharomyces pombe (strain 972 / ATCC 24843) OX=284812 GN=SPBPB21E7.04c PE=3 SV=1)
91482	hypothetical protein	1530	4.32	28.205	4.32929	2.11413	0.00454897	0.0379139	yes	up	XP_024772106.1(hypothetical protein M431DRAFT_91482 [Trichoderma harzianum CBS 226.95])	GO:0007018(biological_process:microtubule-based movement); GO:0003777(molecular_function:microtubule motor activity); GO:0005868(cellular_component:cytoplasmic dynein complex)	K10416	DYNC1LI, DNCLI	map04145(Phagosome)	ENOG410XQS4(Z:Cytoskeleton)	ENOG410XQS4(Dynein cytoplasmic 1 light intermediate chain)	PF05783.8(DLIC:Dynein light intermediate chain (DLIC))	sp|Q5RE09|DC1L2_PONAB(Cytoplasmic dynein 1 light intermediate chain 2 OS=Pongo abelii OX=9601 GN=DYNC1LI2 PE=2 SV=1)
3087	hypothetical protein	660	10.485	75.095	4.76986	2.25395	0.00452513	0.0378243	yes	up	XP_024777741.1(hypothetical protein M431DRAFT_3087 [Trichoderma harzianum CBS 226.95])	GO:0005794(cellular_component:Golgi apparatus); GO:0016021(cellular_component:integral component of membrane); GO:0006810(biological_process:transport); GO:0005789(cellular_component:endoplasmic reticulum membrane)	K20346	TMED4_9_11		ENOG410XPUW(U:Intracellular trafficking, secretion, and vesicular transport)	ENOG410XPUW(COPI coating of Golgi vesicle)	PF01105.21(EMP24_GP25L:emp24/gp25L/p24 family/GOLD)	sp|O14324|YB79_SCHPO(Uncharacterized membrane protein C16E9.09c OS=Schizosaccharomyces pombe (strain 972 / ATCC 24843) OX=284812 GN=SPBC16E9.09c PE=3 SV=1)
181829	hypothetical protein	2230	65.615	399.47	4.03947	2.01417	0.00452289	0.0378243	yes	up	XP_024780131.1(hypothetical protein M431DRAFT_181829 [Trichoderma harzianum CBS 226.95])	GO:0016787(molecular_function:hydrolase activity); GO:0005838(cellular_component:proteasome regulatory particle); GO:0044267(biological_process:cellular protein metabolic process); GO:0036459(molecular_function:thiol-dependent ubiquitinyl hydrolase activity); GO:0005654(cellular_component:nucleoplasm); GO:0006511(biological_process:ubiquitin-dependent protein catabolic process); GO:1901799(biolog…	K11843	USP14, UBP6		ENOG410XP96(O:Posttranslational modification, protein turnover, chaperones)	ENOG410XP96(ubiquitin thiolesterase activity)	PF00443.26(UCH:Ubiquitin carboxyl-terminal hydrolase); PF13423.3(UCH_1:Ubiquitin carboxyl-terminal hydrolase); PF00240.20(ubiquitin:Ubiquitin family)	sp|Q92353|UBP6_SCHPO(Ubiquitin carboxyl-terminal hydrolase 6 OS=Schizosaccharomyces pombe (strain 972 / ATCC 24843) OX=284812 GN=ubp6 PE=1 SV=2)
505084	hypothetical protein	564	0	6.17	71.1923	6.15365	0.00450513	0.0377664	yes	up	XP_024777184.1(hypothetical protein M431DRAFT_505084 [Trichoderma harzianum CBS 226.95])
505646	hypothetical protein	1068	2.77	22.035	5.15675	2.36646	0.00444684	0.0373862	yes	up	XP_024777760.1(hypothetical protein M431DRAFT_505646 [Trichoderma harzianum CBS 226.95])					ENOG410YNPV(S:Function unknown); ENOG4111TS6(I:Lipid transport and metabolism); ENOG410YKXB(S:Function unknown)	ENOG410YNPV(Conserved hypothetical, protein); ENOG4111TS6(Catalyzes the hydrolysis of N-formyl-L-kynurenine to L- kynurenine, the second step in the kynurenine pathway of tryptophan degradation. Kynurenine may be further oxidized to nicotinic acid, NAD(H) and NADP(H). Required for elimination of toxic metabolites (By similarity)); ENOG410YKXB(-)
494050	hypothetical protein	915	12.145	85.875	4.56746	2.19139	0.00442877	0.0373067	yes	up	XP_024775288.1(hypothetical protein M431DRAFT_494050 [Trichoderma harzianum CBS 226.95])	GO:0016020(cellular_component:membrane)	K11244	WSC	map04011(MAPK signaling pathway - yeast); map04139(Mitophagy - yeast)	ENOG4111WHY(S:Function unknown)	ENOG4111WHY(WSC domain)	PF01822.16(WSC:WSC domain); PF08693.7(SKG6:Transmembrane alpha-helix domain)
75704	hypothetical protein	768	12.9	83.6	4.46093	2.15734	0.00440695	0.0371952	yes	up	XP_024778617.1(hypothetical protein M431DRAFT_75704 [Trichoderma harzianum CBS 226.95])	GO:0016021(cellular_component:integral component of membrane)				ENOG4111UG0(S:Function unknown)	ENOG4111UG0(progesterone receptor membrane component)	PF00173.25(Cyt-b5:Cytochrome b5-like Heme/Steroid binding domain)	sp|A2CES0|NEUFC_DANRE(Neuferricin OS=Danio rerio OX=7955 GN=cyb5d2 PE=3 SV=1)
493472	hypothetical protein	531	52.22	324.83	4.47612	2.16225	0.00437191	0.0370366	yes	up	XP_024776676.1(hypothetical protein M431DRAFT_493472 [Trichoderma harzianum CBS 226.95])	GO:0016021(cellular_component:integral component of membrane)	K17278	PGRMC1_2		ENOG4111UG0(S:Function unknown)	ENOG4111UG0(-)	PF00173.25(Cyt-b5:Cytochrome b5-like Heme/Steroid binding domain)	sp|Q12091|DAP1_YEAST(Damage response protein 1 OS=Saccharomyces cerevisiae (strain ATCC 204508 / S288c) OX=559292 GN=DAP1 PE=1 SV=1)
75586	hypothetical protein	4395	43.765	277.945	4.28918	2.1007	0.00433881	0.0368352	yes	up	XP_024778688.1(hypothetical protein M431DRAFT_75586 [Trichoderma harzianum CBS 226.95])	GO:0016021(cellular_component:integral component of membrane)				COG5038(S:Function unknown)	COG5038(Domain-Containing protein)	PF00168.27(C2:C2 domain); PF17047.2(SMP_LBD:Synaptotagmin-like mitochondrial-lipid-binding domain)	sp|P48231|TCB2_YEAST(Tricalbin-2 OS=Saccharomyces cerevisiae (strain ATCC 204508 / S288c) OX=559292 GN=TCB2 PE=1 SV=1)
480627	hypothetical protein	987	8.14	10.275	8.60921	3.10588	0.00432474	0.0367842	yes	up	XP_024776692.1(hypothetical protein M431DRAFT_480627 [Trichoderma harzianum CBS 226.95])					ENOG410ZCPI(S:Function unknown)	ENOG410ZCPI(-)
101737	hypothetical protein	813	0.61	9.125	10.1575	3.34448	0.00429984	0.0366676	yes	up	XP_024767374.1(hypothetical protein M431DRAFT_101737 [Trichoderma harzianum CBS 226.95])
121495	hypothetical protein	514	3.315	37.165	8.1574	3.02811	0.00430086	0.0366676	yes	up	XP_013945627.1(hypothetical protein TRIATDRAFT_93270 [Trichoderma atroviride IMI 206040])	GO:0005730(cellular_component:nucleolus); GO:0005829(cellular_component:cytosol); GO:0005666(cellular_component:DNA-directed RNA polymerase III complex); GO:0008270(molecular_function:zinc ion binding); GO:0003676(molecular_function:nucleic acid binding); GO:0006386(biological_process:termination of RNA polymerase III transcription); GO:0042779(biological_process:tRNA 3'-trailer cleavage); GO:000…	K03019	RPC11, POLR3K	map00230(Purine metabolism); map00240(Pyrimidine metabolism); map03020(RNA polymerase)	COG1594(S:Function unknown)	COG1594(thaumatin-like protein)	PF01096.15(TFIIS_C:Transcription factor S-II (TFIIS)); PF02150.13(RNA_POL_M_15KD:RNA polymerases M/15 Kd subunit)	sp|Q04307|RPC10_YEAST(DNA-directed RNA polymerase III subunit RPC10 OS=Saccharomyces cerevisiae (strain ATCC 204508 / S288c) OX=559292 GN=RPC11 PE=1 SV=1)
510224	hypothetical protein	1371	0.905	24.215	8.92906	3.15851	0.00424136	0.0363662	yes	up	XP_024772639.1(hypothetical protein M431DRAFT_510224 [Trichoderma harzianum CBS 226.95])	GO:0055114(biological_process:oxidation-reduction process); GO:0016491(molecular_function:oxidoreductase activity)				COG0673(S:Function unknown)	COG0673(CWF19-like 2, cell cycle control (S. pombe))	PF01408.19(GFO_IDH_MocA:Oxidoreductase family, NAD-binding Rossmann fold)	sp|Q2UPA7|ACLE_ASPOR(Dehydrogenase aclE OS=Aspergillus oryzae (strain ATCC 42149 / RIB 40) OX=510516 GN=aclE PE=3 SV=1)
73811	hypothetical protein	453	21.795	142.315	4.05256	2.01883	0.00424161	0.0363662	yes	up	XP_024779353.1(hypothetical protein M431DRAFT_73811 [Trichoderma harzianum CBS 226.95])	GO:0015031(biological_process:protein transport); GO:0008565(molecular_function:protein transporter activity)				COG5030(T:Signal transduction mechanisms)	COG5030(Required for the formation of a threonylcarbamoyl group on adenosine at position 37 (t(6)A37) in tRNAs that read codons beginning with adenine (By similarity))	PF01217.17(Clat_adaptor_s:Clathrin adaptor complex small chain)	sp|Q9P7N2|AP1S1_SCHPO(AP-1 complex subunit sigma-1 OS=Schizosaccharomyces pombe (strain 972 / ATCC 24843) OX=284812 GN=vas2 PE=1 SV=1)
100502	hypothetical protein	1587	7.685	50.735	4.26664	2.0931	0.00417202	0.0359831	yes	up	XP_024767902.1(hypothetical protein M431DRAFT_100502 [Trichoderma harzianum CBS 226.95])	GO:0030955(molecular_function:potassium ion binding); GO:0016301(molecular_function:kinase activity); GO:0005829(cellular_component:cytosol); GO:0000287(molecular_function:magnesium ion binding); GO:0042866(biological_process:pyruvate biosynthetic process); GO:0061621(biological_process:canonical glycolysis); GO:0004743(molecular_function:pyruvate kinase activity); GO:0006096(biological_process:g…	K00873	PK, pyk	map00010(Glycolysis / Gluconeogenesis); map00230(Purine metabolism); map00620(Pyruvate metabolism)	COG0469(G:Carbohydrate transport and metabolism)	COG0469(Pyruvate kinase)	PF00224.18(PK:Pyruvate kinase, barrel domain); PF02887.13(PK_C:Pyruvate kinase, alpha/beta domain); PF03328.11(HpcH_HpaI:HpcH/HpaI aldolase/citrate lyase family)	sp|P31865|KPYK_HYPJE(Pyruvate kinase OS=Hypocrea jecorina OX=51453 GN=pki1 PE=3 SV=1)
72568	hypothetical protein	555	1.355	19.87	9.65886	3.27185	0.00416163	0.0359293	yes	up	XP_024780520.1(hypothetical protein M431DRAFT_72568 [Trichoderma harzianum CBS 226.95])	GO:0016021(cellular_component:integral component of membrane)				ENOG41118KQ(S:Function unknown)	ENOG41118KQ(ER membrane protein complex subunit 4)	PF06417.9(DUF1077:Protein of unknown function (DUF1077))	sp|O94520|YQ13_SCHPO(ER membrane protein complex subunit 4 OS=Schizosaccharomyces pombe (strain 972 / ATCC 24843) OX=284812 GN=SPCC1281.03c PE=3 SV=1)
100529	hypothetical protein	1251	3.635	28.55	4.99976	2.32186	0.00415273	0.0358882	yes	up	XP_024767922.1(hypothetical protein M431DRAFT_100529 [Trichoderma harzianum CBS 226.95])	GO:0006629(biological_process:lipid metabolic process); GO:0008889(molecular_function:glycerophosphodiester phosphodiesterase activity)	K01126	E3.1.4.46, glpQ, ugpQ	map00564(Glycerophospholipid metabolism)	ENOG410XPMS(I:Lipid transport and metabolism)	ENOG410XPMS(glycerophosphoryl diester phosphodiesterase)	PF03009.14(GDPD:Glycerophosphoryl diester phosphodiesterase family)	sp|D4AIS9|A4177_ARTBC(Extracellular protein ARB_04177 OS=Arthroderma benhamiae (strain ATCC MYA-4681 / CBS 112371) OX=663331 GN=ARB_04177 PE=1 SV=1)
504035	hypothetical protein	1261	6.87	52.045	4.89005	2.28985	0.00409415	0.0355413	yes	up	XP_024778756.1(hypothetical protein M431DRAFT_504035 [Trichoderma harzianum CBS 226.95])	GO:1990023(cellular_component:mitotic spindle midzone); GO:0005829(cellular_component:cytosol); GO:0051010(molecular_function:microtubule plus-end binding); GO:0055028(cellular_component:cortical microtubule); GO:0000743(biological_process:nuclear migration involved in conjugation with cellular fusion); GO:0000742(biological_process:karyogamy involved in conjugation with cellular fusion); GO:0005…	K10436	MAPRE		COG5217(Z:Cytoskeleton)	COG5217(microtubule-associated protein RP EB family member)	PF03271.14(EB1:EB1-like C-terminal motif); PF00307.28(CH:Calponin homology (CH) domain)	sp|Q10113|MAL3_SCHPO(Microtubule integrity protein mal3 OS=Schizosaccharomyces pombe (strain 972 / ATCC 24843) OX=284812 GN=mal3 PE=1 SV=1)
153323	hypothetical protein	1680	5.305	34.8	4.40022	2.13758	0.00408968	0.0355413	yes	up	XP_024769302.1(hypothetical protein M431DRAFT_153323 [Trichoderma harzianum CBS 226.95])	GO:0006888(biological_process:ER to Golgi vesicle-mediated transport); GO:0005829(cellular_component:cytosol); GO:0044732(cellular_component:mitotic spindle pole body); GO:0005968(cellular_component:Rab-protein geranylgeranyltransferase complex); GO:0006612(biological_process:protein targeting to membrane); GO:0004663(molecular_function:Rab geranylgeranyltransferase activity); GO:0018344(biologic…	K20306;K14050	TRAPPC9, TRS120;RABGGTA		COG5536(B:Chromatin structure and dynamics)	COG5536(histone h2a)	PF01239.19(PPTA:Protein prenyltransferase alpha subunit repeat)	sp|O94412|PGTA_SCHPO(Geranylgeranyl transferase type-2 subunit alpha OS=Schizosaccharomyces pombe (strain 972 / ATCC 24843) OX=284812 GN=bet4 PE=3 SV=1)
490551	hypothetical protein	2301	24.195	165.975	4.38498	2.13257	0.00409618	0.0355413	yes	up	XP_024778594.1(hypothetical protein M431DRAFT_490551 [Trichoderma harzianum CBS 226.95])	GO:0005737(cellular_component:cytoplasm); GO:0003871(molecular_function:5-methyltetrahydropteroyltriglutamate-homocysteine S-methyltransferase activity); GO:0005829(cellular_component:cytosol); GO:0032259(biological_process:methylation); GO:0019280(biological_process:L-methionine biosynthetic process from homoserine via O-acetyl-L-homoserine and cystathionine); GO:0009086(biological_process:methi…	K00549	metE	map00270(Cysteine and methionine metabolism); map00450(Selenocompound metabolism)	COG0620(E:Amino acid transport and metabolism)	COG0620(Catalyzes the transfer of a methyl group from 5- methyltetrahydrofolate to homocysteine resulting in methionine formation (By similarity))	PF01717.15(Meth_synt_2:Cobalamin-independent synthase, Catalytic domain); PF08267.9(Meth_synt_1:Cobalamin-independent synthase, N-terminal domain)	sp|Q9UT19|METE_SCHPO(Probable 5-methyltetrahydropteroyltriglutamate--homocysteine methyltransferase OS=Schizosaccharomyces pombe (strain 972 / ATCC 24843) OX=284812 GN=met26 PE=1 SV=1)
90066	hypothetical protein	2925	2.3	14.68	4.54097	2.183	0.00407964	0.03554	yes	up	XP_024772190.1(hypothetical protein M431DRAFT_90066 [Trichoderma harzianum CBS 226.95])	GO:0008565(molecular_function:protein transporter activity); GO:0005794(cellular_component:Golgi apparatus); GO:0006896(biological_process:Golgi to vacuole transport); GO:0006886(biological_process:intracellular protein transport); GO:0006623(biological_process:protein targeting to vacuole); GO:0030117(cellular_component:membrane coat); GO:0030123(cellular_component:AP-3 adaptor complex); GO:0005…	K12396	AP3D		ENOG410XQFB(U:Intracellular trafficking, secretion, and vesicular transport)	ENOG410XQFB(Adaptor-related protein complex 3, delta 1 subunit)	PF01602.17(Adaptin_N:Adaptin N terminal region); PF12717.4(Cnd1:non-SMC mitotic condensation complex subunit 1)	sp|Q9UTL8|AP3D_SCHPO(AP-3 complex subunit delta OS=Schizosaccharomyces pombe (strain 972 / ATCC 24843) OX=284812 GN=apl5 PE=3 SV=2)
512303	carbohydrate-binding module family 1 protein	1984	3.23	13.453	2.52069	1.33382	0.00378586	0.0355256	yes	up	XP_024769765.1(carbohydrate-binding module family 1 protein [Trichoderma harzianum CBS 226.95])	GO:0005576(cellular_component:extracellular region); GO:0030248(molecular_function:cellulose binding); GO:0008810(molecular_function:cellulase activity); GO:0030245(biological_process:cellulose catabolic process); GO:0004553(molecular_function:hydrolase activity, hydrolyzing O-glycosyl compounds)	K19357	CELB	map00500(Starch and sucrose metabolism)	ENOG410YC82(G:Carbohydrate transport and metabolism); ENOG410YC61(G:Carbohydrate transport and metabolism)	ENOG410YC82(Has endoglucanase activity on substrates containing beta-1,4 glycosidic bonds, like in carboxymethylcellulose (CMC), hydroxyethylcellulose (HEC) and beta-glucan. Involved in the degradation of complex natural cellulosic substrates); ENOG410YC61(Has endoglucanase activity on substrates containing beta-1,4 glycosidic bonds, like in carboxymethylcellulose (CMC), hydroxyethylcellulose (HE…	PF00840.17(Glyco_hydro_7:Glycosyl hydrolase family 7); PF00734.15(CBM_1:Fungal cellulose binding domain)	sp|A0A024SNB7|GUN1_HYPJR(Endoglucanase EG-1 OS=Hypocrea jecorina (strain ATCC 56765 / BCRC 32924 / NRRL 11460 / Rut C-30) OX=1344414 GN=egl1 PE=1 SV=1)
98229	hypothetical protein	1749	3.23	23.27	4.69273	2.23043	0.00406709	0.0354663	yes	up	XP_024768841.1(hypothetical protein M431DRAFT_98229 [Trichoderma harzianum CBS 226.95])	GO:0016020(cellular_component:membrane)				ENOG4110XM7(S:Function unknown); ENOG4110XFZ(S:Function unknown); ENOG410Y9X7(S:Function unknown)	ENOG4110XM7(-); ENOG4110XFZ(-); ENOG410Y9X7(Conserved hypothetical, protein)	PF01442.15(Apolipoprotein:Apolipoprotein A1/A4/E domain)
88721	hypothetical protein	1644	8.495	71.95	4.77411	2.25523	0.00404227	0.0352854	yes	up	XP_024772723.1(hypothetical protein M431DRAFT_88721 [Trichoderma harzianum CBS 226.95])	GO:0000042(biological_process:protein targeting to Golgi); GO:0005622(cellular_component:intracellular)				ENOG410YC53(S:Function unknown)	ENOG410YC53(golgi matrix protein)	PF10375.6(GRAB:GRIP-related Arf-binding domain); PF08317.8(Spc7:Spc7 kinetochore protein)	sp|O42903|YBAC_SCHPO(GRIP domain-containing protein C119.12 OS=Schizosaccharomyces pombe (strain 972 / ATCC 24843) OX=284812 GN=SPBC119.12 PE=2 SV=1)
3495	hypothetical protein	1077	2.1	17.625	5.51582	2.46357	0.00396809	0.034778	yes	up	XP_024775983.1(hypothetical protein M431DRAFT_3495 [Trichoderma harzianum CBS 226.95])	GO:0052829(molecular_function:inositol-1,3,4-trisphosphate 1-phosphatase activity); GO:0005829(cellular_component:cytosol); GO:0008441(molecular_function:3'(2'),5'-bisphosphate nucleotidase activity); GO:0016311(biological_process:dephosphorylation); GO:0016021(cellular_component:integral component of membrane); GO:0004441(molecular_function:inositol-1,4-bisphosphate 1-phosphatase activity); GO:0…	K01082	cysQ, MET22, BPNT1	map00920(Sulfur metabolism)	COG1218(S:Function unknown)	COG1218(Complex 1 protein (LYR family))	PF00459.22(Inositol_P:Inositol monophosphatase family)	sp|Q5BCG1|DPNP_EMENI(3'(2'),5'-bisphosphate nucleotidase OS=Emericella nidulans (strain FGSC A4 / ATCC 38163 / CBS 112.46 / NRRL 194 / M139) OX=227321 GN=AN1769 PE=1 SV=1)
72779	hypothetical protein	4578	3.365	22.825	4.33358	2.11556	0.00392543	0.0345087	yes	up	XP_024780918.1(hypothetical protein M431DRAFT_72779 [Trichoderma harzianum CBS 226.95])	GO:0004622(molecular_function:lysophospholipase activity); GO:0016021(cellular_component:integral component of membrane); GO:0016042(biological_process:lipid catabolic process); GO:0005789(cellular_component:endoplasmic reticulum membrane)	K14676	NTE, NRE	map00564(Glycerophospholipid metabolism)	COG0664(T:Signal transduction mechanisms)	COG0664(transcriptional regulator, crp fnr family)	PF00027.26(cNMP_binding:Cyclic nucleotide-binding domain); PF01734.19(Patatin:Patatin-like phospholipase)	sp|A4QVZ8|NTE1_MAGO7(Lysophospholipase NTE1 OS=Magnaporthe oryzae (strain 70-15 / ATCC MYA-4617 / FGSC 8958) OX=242507 GN=NTE1 PE=3 SV=2)
477994	hypothetical protein	2637	54.725	355.035	4.21249	2.07467	0.00391578	0.0344589	yes	up	XP_024778510.1(hypothetical protein M431DRAFT_477994 [Trichoderma harzianum CBS 226.95])	GO:0045261(cellular_component:proton-transporting ATP synthase complex, catalytic core F(1)); GO:0015986(biological_process:ATP synthesis coupled proton transport); GO:0046961(molecular_function:proton-transporting ATPase activity, rotational mechanism); GO:0046933(molecular_function:proton-transporting ATP synthase activity, rotational mechanism)	K02134	ATPeF1D, ATP5D, ATP16	map00190(Oxidative phosphorylation)	ENOG410ZENJ(S:Function unknown); COG0355(C:Energy production and conversion)	ENOG410ZENJ(-); COG0355(Produces ATP from ADP in the presence of a proton gradient across the membrane (By similarity))	PF02823.13(ATP-synt_DE_N:ATP synthase, Delta/Epsilon chain, beta-sandwich domain)	sp|P56525|ATPD_NEUCR(ATP synthase subunit delta, mitochondrial OS=Neurospora crassa (strain ATCC 24698 / 74-OR23-1A / CBS 708.71 / DSM 1257 / FGSC 987) OX=367110 GN=des PE=3 SV=2)
515987	hypothetical protein	4041	3.415	25.565	4.69398	2.23081	0.00391087	0.0344506	yes	up	XP_024778490.1(hypothetical protein M431DRAFT_515987 [Trichoderma harzianum CBS 226.95])					ENOG410XTEV(S:Function unknown)	ENOG410XTEV(filamentation protein (Rhf1))
130317	hypothetical protein	746	0	4.2	74.3037	6.21536	0.00384929	0.0340465	yes	up	XP_024779654.1(hypothetical protein M431DRAFT_130317 [Trichoderma harzianum CBS 226.95])					ENOG4111X6E(S:Function unknown)	ENOG4111X6E(-)
5800	hypothetical protein	2721	18.445	136.21	4.20751	2.07297	0.00381812	0.0338054	yes	up	OPB44444.1(HET-containing protein, unknown [Trichoderma guizhouense])					ENOG410Z52T(S:Function unknown)	ENOG410Z52T(NIMA-interacting protein TinC)	PF07217.8(Het-C:Heterokaryon incompatibility protein Het-C)
490561	hypothetical protein	1014	9.315	74.645	5.03868	2.33304	0.00377434	0.0336238	yes	up	PNP54229.1(hypothetical protein THARTR1_05436 [Trichoderma harzianum])	GO:0051301(biological_process:cell division); GO:0005525(molecular_function:GTP binding)	K16938	SEPT3_9_12		COG5019(F:Nucleotide transport and metabolism)	COG5019(Essential for recycling GMP and indirectly, cGMP (By similarity))	PF00735.15(Septin:Septin); PF01926.20(MMR_HSR1:50S ribosome-binding GTPase); PF04548.13(AIG1:AIG1 family); PF03193.13(DUF258:Protein of unknown function, DUF258)	sp|Q09116|SPN2_SCHPO(Septin homolog spn2 OS=Schizosaccharomyces pombe (strain 972 / ATCC 24843) OX=284812 GN=spn2 PE=1 SV=2)
85093	hypothetical protein	1119	97.115	656.72	4.59597	2.20037	0.00374358	0.0333931	yes	up	XP_024774283.1(hypothetical protein M431DRAFT_85093 [Trichoderma harzianum CBS 226.95])	GO:0000413(biological_process:protein peptidyl-prolyl isomerization); GO:0006457(biological_process:protein folding); GO:0003755(molecular_function:peptidyl-prolyl cis-trans isomerase activity)	K05864	PPID, CYPD		COG0652(S:Function unknown); COG0457(S:Function unknown)	COG0652(GTPase Activating protein); COG0457(GTPase Activating protein)	PF00160.18(Pro_isomerase:Cyclophilin type peptidyl-prolyl cis-trans isomerase/CLD); PF07719.14(TPR_2:Tetratricopeptide repeat); PF00515.25(TPR_1:Tetratricopeptide repeat); PF13371.3(TPR_9:Tetratricopeptide repeat)	sp|Q4HXF6|PPID_GIBZE(Peptidyl-prolyl cis-trans isomerase D OS=Gibberella zeae (strain PH-1 / ATCC MYA-4620 / FGSC 9075 / NRRL 31084) OX=229533 GN=CPR6 PE=3 SV=1)
509576	hypothetical protein	512	86.445	640.975	4.88505	2.28837	0.00371991	0.0333657	yes	up	XP_024772953.1(hypothetical protein M431DRAFT_509576 [Trichoderma harzianum CBS 226.95])					ENOG410Y3Z9(S:Function unknown); ENOG410Y4X7(S:Function unknown); COG0507(S:Function unknown); ENOG4110B6F(S:Function unknown)	ENOG410Y3Z9(CVNH domain); ENOG410Y4X7(CVNH domain); COG0507(CVNH domain); ENOG4110B6F(CVNH domain)	PF08881.7(CVNH:CVNH domain)	sp|Q5MK11|CVNH_TUBBO(Cyanovirin-N homolog OS=Tuber borchii OX=42251 PE=1 SV=1)
150577	hypothetical protein	952	1.12	17.575	9.79037	3.29136	0.00370484	0.0332783	yes	up	XP_024771172.1(hypothetical protein M431DRAFT_150577 [Trichoderma harzianum CBS 226.95])	GO:0003824(molecular_function:catalytic activity); GO:0008152(biological_process:metabolic process)				COG0179(S:Function unknown); COG5151(S:Function unknown)	COG0179(Fungal specific transcription factor domain); COG5151(Fungal specific transcription factor domain)	PF01557.15(FAA_hydrolase:Fumarylacetoacetate (FAA) hydrolase family)	sp|Q54BF3|FAHD2_DICDI(Fumarylacetoacetate hydrolase domain-containing protein 2 homolog OS=Dictyostelium discoideum OX=44689 GN=fahd2 PE=3 SV=1)
493621	hypothetical protein	906	11.125	82.075	4.93406	2.30278	0.00369481	0.0332783	yes	up	XP_024776824.1(hypothetical protein M431DRAFT_493621 [Trichoderma harzianum CBS 226.95])	GO:0046872(molecular_function:metal ion binding); GO:0003677(molecular_function:DNA binding)				ENOG410ZJGQ(S:Function unknown)	ENOG410ZJGQ(Zinc finger protein)	PF13894.3(zf-C2H2_4:C2H2-type zinc finger); PF00096.23(zf-C2H2:Zinc finger, C2H2 type)	sp|Q9JMD0|ZN207_MOUSE(BUB3-interacting and GLEBS motif-containing protein ZNF207 OS=Mus musculus OX=10090 GN=Znf207 PE=1 SV=1)
95539	hypothetical protein	2679	20.85	133.38	4.1269	2.04506	0.00365987	0.0331492	yes	up	XP_024770059.1(hypothetical protein M431DRAFT_95539 [Trichoderma harzianum CBS 226.95])					COG1774(S:Function unknown)	COG1774(PSP1 C-terminal conserved region)	PF04468.9(PSP1:PSP1 C-terminal conserved region)	sp|Q9C0V4|YOM2_SCHPO(Uncharacterized protein PB7E8.02 OS=Schizosaccharomyces pombe (strain 972 / ATCC 24843) OX=284812 GN=SPBPB7E8.02 PE=4 SV=1)
508818	hypothetical protein	732	0.105	7.39	47.2783	5.56311	0.00342151	0.0314212	yes	up	PKK42811.1(hypothetical protein CI102_13470 [Trichoderma harzianum])	GO:0045454(biological_process:cell redox homeostasis); GO:0015035(molecular_function:protein disulfide oxidoreductase activity); GO:0006662(biological_process:glycerol ether metabolic process); GO:0005623(cellular_component:cell); GO:0055114(biological_process:oxidation-reduction process)	K03671	trxA		COG0526(G:Carbohydrate transport and metabolism)	COG0526(Major Facilitator Superfamily)	PF00085.17(Thioredoxin:Thioredoxin); PF13899.3(Thioredoxin_7:Thioredoxin-like); PF13098.3(Thioredoxin_2:Thioredoxin-like domain); PF14595.3(Thioredoxin_9:Thioredoxin); PF13905.3(Thioredoxin_8:Thioredoxin-like); PF04756.10(OST3_OST6:OST3 / OST6 family, transporter family)	sp|P29429|THIO_EMENI(Thioredoxin OS=Emericella nidulans (strain FGSC A4 / ATCC 38163 / CBS 112.46 / NRRL 194 / M139) OX=227321 GN=TRX1 PE=1 SV=2)
405376	hypothetical protein	1880	6.67	44.485	4.34885	2.12063	0.00338262	0.0312253	yes	up	XP_024775311.1(hypothetical protein M431DRAFT_405376 [Trichoderma harzianum CBS 226.95])	GO:0000502(cellular_component:proteasome complex); GO:0042176(biological_process:regulation of protein catabolic process); GO:0050790(biological_process:regulation of catalytic activity); GO:0030234(molecular_function:enzyme regulator activity); GO:0008541(cellular_component:proteasome regulatory particle, lid subcomplex)	K03033	PSMD3, RPN3	map03050(Proteasome)	ENOG410XS40(O:Posttranslational modification, protein turnover, chaperones)	ENOG410XS40(26S proteasome nonATPase regulatory subunit)	PF08375.8(Rpn3_C:Proteasome regulatory subunit C-terminal); PF01399.24(PCI:PCI domain)	sp|O42897|RPN3_SCHPO(Probable 26S proteasome regulatory subunit rpn3 OS=Schizosaccharomyces pombe (strain 972 / ATCC 24843) OX=284812 GN=rpn3 PE=3 SV=2)
521967	hypothetical protein	801	2.145	20.09	6.31226	2.65816	0.00333443	0.0308791	yes	up	XP_024772514.1(hypothetical protein M431DRAFT_521967 [Trichoderma harzianum CBS 226.95])	GO:0016021(cellular_component:integral component of membrane)				ENOG410Y3D7(S:Function unknown); ENOG4110VR0(S:Function unknown)	ENOG410Y3D7(-); ENOG4110VR0(-)
76132	hypothetical protein	1668	4.54	60.93	8.065	3.01167	0.00326649	0.0303797	yes	up	XP_024778984.1(hypothetical protein M431DRAFT_76132 [Trichoderma harzianum CBS 226.95])	GO:0000287(molecular_function:magnesium ion binding); GO:0005975(biological_process:carbohydrate metabolic process); GO:0016868(molecular_function:intramolecular transferase activity, phosphotransferases)	K01835	pgm	map00010(Glycolysis / Gluconeogenesis); map00030(Pentose phosphate pathway); map00052(Galactose metabolism); map00230(Purine metabolism); map00500(Starch and sucrose metabolism); map00520(Amino sugar and nucleotide sugar metabolism)	COG0033(G:Carbohydrate transport and metabolism)	COG0033(phosphoglucomutase)	PF02878.13(PGM_PMM_I:Phosphoglucomutase/phosphomannomutase, alpha/beta/alpha domain I); PF02880.13(PGM_PMM_III:Phosphoglucomutase/phosphomannomutase, alpha/beta/alpha domain III); PF02879.13(PGM_PMM_II:Phosphoglucomutase/phosphomannomutase, alpha/beta/alpha domain II); PF00408.17(PGM_PMM_IV:Phosphoglucomutase/phosphomannomutase, C-terminal domain)	sp|Q4WY53|PGM_ASPFU(Phosphoglucomutase OS=Neosartorya fumigata (strain ATCC MYA-4609 / Af293 / CBS 101355 / FGSC A1100) OX=330879 GN=pgmA PE=3 SV=1)
511826	hypothetical protein	1260	7.445	53.72	4.65204	2.21786	0.00325762	0.0303298	yes	up	XP_024770626.1(hypothetical protein M431DRAFT_511826 [Trichoderma harzianum CBS 226.95])	GO:0005737(cellular_component:cytoplasm); GO:0080129(biological_process:proteasome core complex assembly); GO:0019773(cellular_component:proteasome core complex, alpha-subunit complex); GO:0005634(cellular_component:nucleus); GO:0010499(biological_process:proteasomal ubiquitin-independent protein catabolic process); GO:0004298(molecular_function:threonine-type endopeptidase activity); GO:0042175(…	K02728	PSMA4	map03050(Proteasome)	COG0638(S:Function unknown)	COG0638(SPOC domain)	PF00227.23(Proteasome:Proteasome subunit); PF10584.6(Proteasome_A_N:Proteasome subunit A N-terminal signature)	sp|Q09682|PSA3_SCHPO(Probable proteasome subunit alpha type-3 OS=Schizosaccharomyces pombe (strain 972 / ATCC 24843) OX=284812 GN=SPAC13C5.01c PE=3 SV=1)
504396	hypothetical protein	856	15.505	113.28	4.90578	2.29448	0.00320845	0.0299686	yes	up	PKK46762.1(hypothetical protein CI102_7424 [Trichoderma harzianum])	GO:0003735(molecular_function:structural constituent of ribosome); GO:0005739(cellular_component:mitochondrion); GO:0006412(biological_process:translation); GO:0005762(cellular_component:mitochondrial large ribosomal subunit); GO:0005840(cellular_component:ribosome)				COG0335(J:Translation, ribosomal structure and biogenesis)	COG0335(This protein is located at the 30S-50S ribosomal subunit interface and may play a role in the structure and function of the aminoacyl-tRNA binding site (By similarity))	PF01245.17(Ribosomal_L19:Ribosomal protein L19)	sp|Q9UT87|IMG1_SCHPO(54S ribosomal protein subunit img1, mitochondrial OS=Schizosaccharomyces pombe (strain 972 / ATCC 24843) OX=284812 GN=img1 PE=3 SV=1)
307242	hypothetical protein	776	19.02	150.3	5.29429	2.40444	0.00318918	0.0298852	yes	up	XP_024779244.1(hypothetical protein M431DRAFT_307242 [Trichoderma harzianum CBS 226.95])	GO:0030234(molecular_function:enzyme regulator activity); GO:0030176(cellular_component:integral component of endoplasmic reticulum membrane); GO:0016757(molecular_function:transferase activity, transferring glycosyl groups); GO:0050790(biological_process:regulation of catalytic activity); GO:0019348(biological_process:dolichol metabolic process)	K09658	DPM2	map00510(N-Glycan biosynthesis); map00563(Glycosylphosphatidylinositol (GPI)-anchor biosynthesis)	ENOG41122UH(S:Function unknown)	ENOG41122UH(dolichyl-phosphate beta-D-mannosyltransferase activity)	PF07297.9(DPM2:Dolichol phosphate-mannose biosynthesis regulatory protein (DPM2)); PF08510.9(PIG-P:PIG-P)	sp|Q556K9|DPM2_DICDI(Dolichol phosphate-mannose biosynthesis regulatory protein OS=Dictyostelium discoideum OX=44689 GN=dpm2-1 PE=3 SV=1)
512833	hypothetical protein	1385	7.43	55.24	4.82343	2.27006	0.00312	0.0294599	yes	up	XP_024769051.1(hypothetical protein M431DRAFT_512833 [Trichoderma harzianum CBS 226.95])	GO:0055114(biological_process:oxidation-reduction process); GO:0016491(molecular_function:oxidoreductase activity)	K18107	GAAD	map00040(Pentose and glucuronate interconversions)	COG0656(S:Function unknown)	COG0656(-)	PF00248.18(Aldo_ket_red:Aldo/keto reductase family)	sp|Q0GYU5|GLD1_HYPJE(D/L-glyceraldehyde reductase OS=Hypocrea jecorina OX=51453 GN=gld1 PE=1 SV=1)
490051	hypothetical protein	1992	7.11	48.495	4.507	2.17217	0.0031166	0.0294599	yes	up	XP_024780953.1(hypothetical protein M431DRAFT_490051 [Trichoderma harzianum CBS 226.95])		K20298	VPS52		ENOG410XNZ1(U:Intracellular trafficking, secretion, and vesicular transport)	ENOG410XNZ1(vacuolar protein sorting 52 homolog (S. cerevisiae))	PF04129.9(Vps52:Vps52 / Sac2 family); PF09763.6(Sec3_C:Exocyst complex component Sec3)	sp|Q94KD3|VP52A_ARATH(Vacuolar protein sorting-associated protein 52 A OS=Arabidopsis thaliana OX=3702 GN=VPS52 PE=1 SV=1)
491091	hypothetical protein	423	16.695	162.335	6.50133	2.70073	0.00310988	0.0294536	yes	up	XP_024779173.1(hypothetical protein M431DRAFT_491091 [Trichoderma harzianum CBS 226.95])	GO:0000002(biological_process:mitochondrial genome maintenance); GO:0042645(cellular_component:mitochondrial nucleoid); GO:0006260(biological_process:DNA replication); GO:0003697(molecular_function:single-stranded DNA binding)				COG0629(L:Replication, recombination and repair); COG0445(D:Cell cycle control, cell division, chromosome partitioning)	COG0629(single-stranded DNA-binding protein); COG0445(NAD-binding protein involved in the addition of a carboxymethylaminomethyl (cmnm) group at the wobble position (U34) of certain tRNAs, forming tRNA-cmnm(5)s(2)U34 (By similarity))	PF00436.22(SSB:Single-strand binding protein family)	sp|P32445|RIM1_YEAST(Single-stranded DNA-binding protein RIM1, mitochondrial OS=Saccharomyces cerevisiae (strain ATCC 204508 / S288c) OX=559292 GN=RIM1 PE=1 SV=1)
94553	hypothetical protein	2454	8.38	54.615	4.26369	2.0921	0.00310428	0.0294397	yes	up	XP_024770452.1(hypothetical protein M431DRAFT_94553 [Trichoderma harzianum CBS 226.95])	GO:0005737(cellular_component:cytoplasm); GO:0016740(molecular_function:transferase activity); GO:1902391(biological_process:positive regulation of N-terminal peptidyl-serine acetylation); GO:0010698(molecular_function:acetyltransferase activator activity); GO:0042802(molecular_function:identical protein binding); GO:0043085(biological_process:positive regulation of catalytic activity)	K20792	NAA15_16		ENOG410XR7D(S:Function unknown)	ENOG410XR7D(NatA auxiliary subunit)	PF12569.5(NARP1:NMDA receptor-regulated protein 1); PF14559.3(TPR_19:Tetratricopeptide repeat); PF13432.3(TPR_16:Tetratricopeptide repeat); PF07719.14(TPR_2:Tetratricopeptide repeat); PF00515.25(TPR_1:Tetratricopeptide repeat); PF12895.4(ANAPC3:Anaphase-promoting complex, cyclosome, subunit 3); PF13181.3(TPR_8:Tetratricopeptide repeat); PF13431.3(TPR_17:Tetratricopeptide repeat); PF13414.3(TPR_11…	sp|Q9BXJ9|NAA15_HUMAN(N-alpha-acetyltransferase 15, NatA auxiliary subunit OS=Homo sapiens OX=9606 GN=NAA15 PE=1 SV=1)
491932	hypothetical protein	1470	2.7	21.81	5.32188	2.41194	0.00309461	0.0293801	yes	up	XP_024777374.1(hypothetical protein M431DRAFT_491932 [Trichoderma harzianum CBS 226.95])		K12177	COPS3, CSN3		ENOG410XRKY(O:Posttranslational modification, protein turnover, chaperones)	ENOG410XRKY(COP9 (constitutive photomorphogenic) homolog, subunit 3 (Arabidopsis)		sp|Q7S7G7|CSN3_NEUCR(COP9 signalosome complex subunit 3 OS=Neurospora crassa (strain ATCC 24698 / 74-OR23-1A / CBS 708.71 / DSM 1257 / FGSC 987) OX=367110 GN=csn-3 PE=1 SV=2)
14719	hypothetical protein	693	0	4.83	85.3371	6.4151	0.00306915	0.0292244	yes	up	XP_024777827.1(hypothetical protein M431DRAFT_14719 [Trichoderma harzianum CBS 226.95])		K09252	FAEB		ENOG41100MU(S:Function unknown); ENOG4112801(S:Function unknown); ENOG4110X7R(S:Function unknown); ENOG4110VR9(S:Function unknown)	ENOG41100MU(Protein of unknown function (DUF3237)); ENOG4112801(-); ENOG4110X7R(Protein of unknown function (DUF3237)); ENOG4110VR9(Protein of unknown function (DUF3237))	PF11578.5(DUF3237:Protein of unknown function (DUF3237))	sp|P61167|Y1785_RHOPA(UPF0311 protein RPA1785 OS=Rhodopseudomonas palustris (strain ATCC BAA-98 / CGA009) OX=258594 GN=RPA1785 PE=1 SV=1)
122495	hypothetical protein	2860	6.365	50.88	5.25235	2.39296	0.00307146	0.0292244	yes	up	XP_024770754.1(hypothetical protein M431DRAFT_122495 [Trichoderma harzianum CBS 226.95])	GO:0006891(biological_process:intra-Golgi vesicle-mediated transport); GO:0030173(cellular_component:integral component of Golgi membrane)	K09313	CUTL		ENOG410XPRP(U:Intracellular trafficking, secretion, and vesicular transport)	ENOG410XPRP(Cut-like homeobox)	PF08172.9(CASP_C:CASP C terminal)	sp|P34237|CASP_YEAST(Protein CASP OS=Saccharomyces cerevisiae (strain ATCC 204508 / S288c) OX=559292 GN=COY1 PE=1 SV=2)
82775	hypothetical protein	1197	1.265	13.25	6.7002	2.7442	0.00305646	0.0291973	yes	up	XP_024775566.1(hypothetical protein M431DRAFT_82775 [Trichoderma harzianum CBS 226.95])	GO:0016021(cellular_component:integral component of membrane)	K17803	OMS1		COG0500(S:Function unknown)	COG0500(Conserved hypothetical, protein)	PF13489.3(Methyltransf_23:Methyltransferase domain); PF08241.9(Methyltransf_11:Methyltransferase domain); PF08242.9(Methyltransf_12:Methyltransferase domain); PF01209.15(Ubie_methyltran:ubiE/COQ5 methyltransferase family)	sp|Q06668|OMS1_YEAST(Methyltransferase OMS1, mitochondrial OS=Saccharomyces cerevisiae (strain ATCC 204508 / S288c) OX=559292 GN=OMS1 PE=1 SV=1)
205159	hypothetical protein	1623	72.745	479.965	4.31586	2.10965	0.00303016	0.0290226	yes	up	XP_024780849.1(hypothetical protein M431DRAFT_205159 [Trichoderma harzianum CBS 226.95])	GO:0097159(molecular_function:organic cyclic compound binding); GO:1901363(molecular_function:heterocyclic compound binding)				ENOG4111Z67(S:Function unknown); ENOG410YAAA(S:Function unknown)	ENOG4111Z67(RNA recognition motif. (a.k.a. RRM, RBD, or RNP domain)); ENOG410YAAA(RNP domain protein)	PF00076.19(RRM_1:RNA recognition motif. (a.k.a. RRM, RBD, or RNP domain))	sp|Q9HEQ9|TCG1_SCHPO(Single-stranded TG1-3 DNA-binding protein OS=Schizosaccharomyces pombe (strain 972 / ATCC 24843) OX=284812 GN=tcg1 PE=1 SV=3)
478767	hypothetical protein	468	606.785	3573.99	4.29695	2.10331	0.00300645	0.0288273	yes	up	XP_024779417.1(hypothetical protein M431DRAFT_478767 [Trichoderma harzianum CBS 226.95])
2572	hypothetical protein	1434	4.075	30.96	4.9491	2.30717	0.00297214	0.0286538	yes	up	XP_024777128.1(hypothetical protein M431DRAFT_2572 [Trichoderma harzianum CBS 226.95])	GO:0000221(cellular_component:vacuolar proton-transporting V-type ATPase, V1 domain); GO:0046961(molecular_function:proton-transporting ATPase activity, rotational mechanism); GO:0000329(cellular_component:fungal-type vacuole membrane); GO:0015991(biological_process:ATP hydrolysis coupled proton transport)	K02144	ATPeV1H	map00190(Oxidative phosphorylation); map04145(Phagosome)	COG5231(C:Energy production and conversion)	COG5231(subunit (H)	PF03224.11(V-ATPase_H_N:V-ATPase subunit H); PF11698.5(V-ATPase_H_C:V-ATPase subunit H)	sp|O14265|VATH_SCHPO(V-type proton ATPase subunit H OS=Schizosaccharomyces pombe (strain 972 / ATCC 24843) OX=284812 GN=vma13 PE=3 SV=2)
509737	hypothetical protein	1421	0.4	8.25	13.1265	3.71441	0.00294938	0.0284805	yes	up	XP_024773159.1(hypothetical protein M431DRAFT_509737 [Trichoderma harzianum CBS 226.95])	GO:0008168(molecular_function:methyltransferase activity); GO:0032259(biological_process:methylation)				ENOG410Z6AR(S:Function unknown)	ENOG410Z6AR(Putative methyltransferase)	PF10294.6(Methyltransf_16:Lysine methyltransferase); PF08242.9(Methyltransf_12:Methyltransferase domain); PF13847.3(Methyltransf_31:Methyltransferase domain); PF13649.3(Methyltransf_25:Methyltransferase domain)	sp|Q86JB0|Y8324_DICDI(Putative uncharacterized protein DDB_G0277003 OS=Dictyostelium discoideum OX=44689 GN=DDB_G0277003 PE=4 SV=2)
153133	hypothetical protein	978	0.065	5.815	53.6236	5.7448	0.00291629	0.0282125	yes	up	XP_024769651.1(hypothetical protein M431DRAFT_153133 [Trichoderma harzianum CBS 226.95])	GO:0016021(cellular_component:integral component of membrane); GO:0016020(cellular_component:membrane); GO:0006950(biological_process:response to stress)				ENOG410YC3R(S:Function unknown); ENOG4111Q0B(S:Function unknown)	ENOG410YC3R(RTA1 like protein); ENOG4111Q0B(RTA1 domain protein)	PF04479.10(RTA1:RTA1 like protein); PF09933.6(DUF2165:Predicted small integral membrane protein (DUF2165))	sp|P40113|RTM1_YEASX(Protein RTM1 OS=Saccharomyces cerevisiae OX=4932 GN=RTM1 PE=3 SV=1)
490485	hypothetical protein	414	13.74	112.545	5.64713	2.49752	0.00290457	0.0281619	yes	up	XP_024778535.1(hypothetical protein M431DRAFT_490485 [Trichoderma harzianum CBS 226.95])	GO:0005840(cellular_component:ribosome)	K17424	MRPL43		ENOG4111S17(S:Function unknown)	ENOG4111S17((ribosomal) protein)	PF05047.13(L51_S25_CI-B8:Mitochondrial ribosomal protein L51 / S25 / CI-B8 domain)	sp|Q758S3|RM51_ASHGO(54S ribosomal protein L51, mitochondrial OS=Ashbya gossypii (strain ATCC 10895 / CBS 109.51 / FGSC 9923 / NRRL Y-1056) OX=284811 GN=MRPL51 PE=3 SV=1)
506165	hypothetical protein	3868	0.275	3.095	7.40724	2.88894	0.00288457	0.0279994	yes	up	XP_024776092.1(hypothetical protein M431DRAFT_506165 [Trichoderma harzianum CBS 226.95])	GO:0016787(molecular_function:hydrolase activity); GO:0060543(biological_process:negative regulation of strand invasion); GO:0070336(molecular_function:flap-structured DNA binding); GO:0008026(molecular_function:ATP-dependent helicase activity); GO:0032508(biological_process:DNA duplex unwinding); GO:0033567(biological_process:DNA replication, Okazaki fragment processing); GO:0036297(biological_p…	K14635	MPH1		COG1111(L:Replication, recombination and repair)	COG1111(helicase)	PF04851.12(ResIII:Type III restriction enzyme, res subunit); PF00271.28(Helicase_C:Helicase conserved C-terminal domain); PF00270.26(DEAD:DEAD/DEAH box helicase)	sp|A4RN08|MPH1_MAGO7(ATP-dependent DNA helicase MPH1 OS=Magnaporthe oryzae (strain 70-15 / ATCC MYA-4617 / FGSC 8958) OX=242507 GN=MPH1 PE=3 SV=1)
198672	hypothetical protein	1383	1.085	10.725	6.57629	2.71727	0.00286288	0.0279115	yes	up	XP_024780541.1(hypothetical protein M431DRAFT_198672 [Trichoderma harzianum CBS 226.95])	GO:0016021(cellular_component:integral component of membrane)				ENOG4111G7K(S:Function unknown)	ENOG4111G7K(conserved hypothetical protein)	PF10173.6(Mit_KHE1:Mitochondrial K+-H+ exchange-related)
21854	hypothetical protein	916	28.43	200.145	4.53494	2.18108	0.00286773	0.0279115	yes	up	XP_024767375.1(hypothetical protein M431DRAFT_21854 [Trichoderma harzianum CBS 226.95])					ENOG4111FVP(S:Function unknown)	ENOG4111FVP(tumor protein)	PF00838.14(TCTP:Translationally controlled tumour protein)	sp|Q4IJT5|TCTP_GIBZE(Translationally-controlled tumor protein homolog OS=Gibberella zeae (strain PH-1 / ATCC MYA-4620 / FGSC 9075 / NRRL 31084) OX=229533 GN=FGRRES_02523 PE=3 SV=1)
272536	hypothetical protein	2186	0	1.055	79.547	6.31374	0.00282205	0.027609	yes	up	XP_024769047.1(hypothetical protein M431DRAFT_272536 [Trichoderma harzianum CBS 226.95])					ENOG410YEX2(S:Function unknown); ENOG410XSEB(S:Function unknown)	ENOG410YEX2(-); ENOG410XSEB(conserved hypothetical protein)	PF13650.3(Asp_protease_2:Aspartyl protease); PF13975.3(gag-asp_proteas:gag-polyprotein putative aspartyl protease); PF09668.7(Asp_protease:Aspartyl protease); PF00077.17(RVP:Retroviral aspartyl protease)
309292	hypothetical protein	1281	0.135	3.83	18.7237	4.22679	0.0028078	0.0275998	yes	up	XP_024779293.1(hypothetical protein M431DRAFT_309292 [Trichoderma harzianum CBS 226.95])					ENOG4111DSE(S:Function unknown)	ENOG4111DSE(-)
303	hypothetical protein	1542	1.665	18.19	6.81249	2.76818	0.00273354	0.0270175	yes	up	XP_024779884.1(hypothetical protein M431DRAFT_303 [Trichoderma harzianum CBS 226.95])	GO:0005737(cellular_component:cytoplasm); GO:0004826(molecular_function:phenylalanine-tRNA ligase activity); GO:0000049(molecular_function:tRNA binding); GO:0006432(biological_process:phenylalanyl-tRNA aminoacylation); GO:0009328(cellular_component:phenylalanine-tRNA ligase complex); GO:0005829(cellular_component:cytosol); GO:0005524(molecular_function:ATP binding)	K01889	FARSA, pheS	map00970(Aminoacyl-tRNA biosynthesis)	COG0016(J:Translation, ribosomal structure and biogenesis)	COG0016(phenylalanyL-tRNA synthetase, alpha subunit)	PF01409.17(tRNA-synt_2d:tRNA synthetases class II core domain (F)); PF00152.17(tRNA-synt_2:tRNA synthetases class II (D, K and N))	sp|P15625|SYFA_YEAST(Phenylalanine--tRNA ligase alpha subunit OS=Saccharomyces cerevisiae (strain ATCC 204508 / S288c) OX=559292 GN=FRS2 PE=1 SV=3)
72995	hypothetical protein	852	4.31	36.03	5.64711	2.49751	0.00272232	0.0269856	yes	up	XP_024780949.1(hypothetical protein M431DRAFT_72995 [Trichoderma harzianum CBS 226.95])	GO:0016021(cellular_component:integral component of membrane); GO:0016020(cellular_component:membrane)				ENOG4110TJR(S:Function unknown)	ENOG4110TJR(Yip1 domain family)	PF04893.14(Yip1:Yip1 domain)	sp|Q9UTD3|YIP5_SCHPO(Protein YIP5 OS=Schizosaccharomyces pombe (strain 972 / ATCC 24843) OX=284812 GN=yip5 PE=3 SV=1)
79936	hypothetical protein	342	0	26.345	80.2278	6.32603	0.00269476	0.0267869	yes	up	XP_024776392.1(hypothetical protein M431DRAFT_79936 [Trichoderma harzianum CBS 226.95])	GO:0031505(biological_process:fungal-type cell wall organization)				COG0011(S:Function unknown)	COG0011(Domain of unknown function DUF77)	PF01910.14(Thiamine_BP:Thiamine-binding protein)	sp|P35195|ECM15_YEAST(UPF0045 protein ECM15 OS=Saccharomyces cerevisiae (strain ATCC 204508 / S288c) OX=559292 GN=ECM15 PE=1 SV=1)
2250	hypothetical protein	1020	121.875	784.04	4.28717	2.10003	0.00264737	0.0264051	yes	up	XP_024779365.1(hypothetical protein M431DRAFT_2250 [Trichoderma harzianum CBS 226.95])	GO:0045048(biological_process:protein insertion into ER membrane); GO:1990507(biological_process:ATP-independent chaperone mediated protein folding); GO:0016887(molecular_function:ATPase activity); GO:0000750(biological_process:pheromone-dependent signal transduction involved in conjugation with cellular fusion); GO:0006620(biological_process:posttranslational protein targeting to membrane); GO:0…	K01551	arsA, ASNA1, GET3		COG0003(P:Inorganic ion transport and metabolism)	COG0003(ATPase required for the post-translational delivery of tail-anchored (TA) proteins to the endoplasmic reticulum. Recognizes and selectively binds the transmembrane domain of TA proteins in the cytosol. This complex then targets to the endoplasmic reticulum by membrane-bound receptors, where the tail- anchored protein is released for insertion. This process is regulated by ATP binding and …	PF02374.12(ArsA_ATPase:Anion-transporting ATPase); PF01656.20(CbiA:CobQ/CobB/MinD/ParA nucleotide binding domain); PF13614.3(AAA_31:AAA domain); PF00142.15(Fer4_NifH:4Fe-4S iron sulfur cluster binding proteins, NifH/frxC family); PF10609.6(ParA:NUBPL iron-transfer P-loop NTPase); PF00448.19(SRP54:SRP54-type protein, GTPase domain); PF06564.9(CBP_BcsQ:Cellulose biosynthesis protein BcsQ)	sp|Q870U4|GET3_NEUCR(ATPase get3 OS=Neurospora crassa (strain ATCC 24698 / 74-OR23-1A / CBS 708.71 / DSM 1257 / FGSC 987) OX=367110 GN=get3 PE=3 SV=1)
126532	hypothetical protein	1166	1.245	18.035	9.32776	3.22153	0.00259792	0.0259859	yes	up	XP_024768954.1(hypothetical protein M431DRAFT_126532 [Trichoderma harzianum CBS 226.95])	GO:0016021(cellular_component:integral component of membrane)				ENOG410YG9R(S:Function unknown); ENOG4111I71(S:Function unknown)	ENOG410YG9R(-); ENOG4111I71(-)
531481	hypothetical protein	1542	1.705	16.395	6.56597	2.71501	0.00259919	0.0259859	yes	up	XP_024773511.1(hypothetical protein M431DRAFT_531481 [Trichoderma harzianum CBS 226.95])
493368	hypothetical protein	3441	3.375	31.65	5.90865	2.56283	0.0025524	0.0256364	yes	up	XP_024776577.1(hypothetical protein M431DRAFT_493368 [Trichoderma harzianum CBS 226.95])	GO:0035556(biological_process:intracellular signal transduction); GO:0046872(molecular_function:metal ion binding); GO:0005622(cellular_component:intracellular)				ENOG410YREK(S:Function unknown)	ENOG410YREK(Domain-Containing protein)	PF02141.18(DENN:DENN (AEX-3) domain); PF03455.16(dDENN:dDENN domain); PF03456.15(uDENN:uDENN domain)	sp|Q9Y7Q7|DENN_SCHPO(DENN domain-containing protein C297.05 OS=Schizosaccharomyces pombe (strain 972 / ATCC 24843) OX=284812 GN=SPCC297.05 PE=1 SV=1)
85563	hypothetical protein	1128	7.09	52.14	4.92375	2.29976	0.00254314	0.0255748	yes	up	PKK43849.1(hypothetical protein CI102_13574 [Trichoderma harzianum])					ENOG41114SU(S:Function unknown)	ENOG41114SU(-)
156231	hypothetical protein	1407	8.035	56.195	4.61707	2.20698	0.00250794	0.0253958	yes	up	XP_024767705.1(hypothetical protein M431DRAFT_156231 [Trichoderma harzianum CBS 226.95])	GO:0032995(biological_process:regulation of fungal-type cell wall biogenesis); GO:0034613(biological_process:cellular protein localization); GO:0022627(cellular_component:cytosolic small ribosomal subunit); GO:0031139(biological_process:positive regulation of conjugation with cellular fusion); GO:0005092(molecular_function:GDP-dissociation inhibitor activity); GO:0005080(molecular_function:protei…	K14753	RACK1		ENOG410XQGZ(S:Function unknown)	ENOG410XQGZ(guanine nucleotidebinding protein)	PF00400.29(WD40:WD domain, G-beta repeat); PF11715.5(Nup160:Nucleoporin Nup120/160)	sp|Q01369|GBLP_NEUCR(Guanine nucleotide-binding protein subunit beta-like protein OS=Neurospora crassa (strain ATCC 24698 / 74-OR23-1A / CBS 708.71 / DSM 1257 / FGSC 987) OX=367110 GN=cpc-2 PE=3 SV=1)
511410	hypothetical protein	1402	4.48	34.98	5.24133	2.38993	0.00247338	0.0250752	yes	up	XP_024771001.1(hypothetical protein M431DRAFT_511410 [Trichoderma harzianum CBS 226.95])	GO:0055114(biological_process:oxidation-reduction process); GO:0016491(molecular_function:oxidoreductase activity)				COG0673(S:Function unknown)	COG0673(-)	PF01408.19(GFO_IDH_MocA:Oxidoreductase family, NAD-binding Rossmann fold); PF02894.14(GFO_IDH_MocA_C:Oxidoreductase family, C-terminal alpha/beta domain); PF03447.13(NAD_binding_3:Homoserine dehydrogenase, NAD binding domain)	sp|O42896|YBQ3_SCHPO(Uncharacterized oxidoreductase C115.03 OS=Schizosaccharomyces pombe (strain 972 / ATCC 24843) OX=284812 GN=SPBC115.03 PE=3 SV=1)
427104	hypothetical protein	4032	0	0.555	83.8594	6.3899	0.00244404	0.0248358	yes	up	XP_024774401.1(hypothetical protein M431DRAFT_427104 [Trichoderma harzianum CBS 226.95])		K18441;K15503	CYTH;ANKRD44	map04144(Endocytosis)	COG0666(S:Function unknown)	COG0666(repeat-containing protein)	PF12796.4(Ank_2:Ankyrin repeats (3 copies)); PF13637.3(Ank_4:Ankyrin repeats (many copies)); PF13606.3(Ank_3:Ankyrin repeat); PF13857.3(Ank_5:Ankyrin repeats (many copies)); PF00023.27(Ank:Ankyrin repeat); PF05729.9(NACHT:NACHT domain); PF13191.3(AAA_16:AAA ATPase domain)	sp|G5E8K5|ANK3_MOUSE(Ankyrin-3 OS=Mus musculus OX=10090 GN=Ank3 PE=1 SV=1)
492487	hypothetical protein	3219	0	0.71	83.8594	6.3899	0.00244404	0.0248358	yes	up	XP_024777936.1(hypothetical protein M431DRAFT_492487 [Trichoderma harzianum CBS 226.95])					COG0666(S:Function unknown)	COG0666(Conserved hypothetical, protein)	PF05729.9(NACHT:NACHT domain); PF13191.3(AAA_16:AAA ATPase domain); PF05057.11(DUF676:Putative serine esterase (DUF676))	sp|Q3U213|SRAC1_MOUSE(Protein SERAC1 OS=Mus musculus OX=10090 GN=Serac1 PE=2 SV=1)
511739	hypothetical protein	2146	5.53	41.085	4.976	2.31499	0.00242054	0.0246707	yes	up	XP_024770507.1(hypothetical protein M431DRAFT_511739 [Trichoderma harzianum CBS 226.95])					ENOG410YC8H(S:Function unknown)	ENOG410YC8H(Conserved hypothetical, protein)
20764	hypothetical protein	1407	20.485	138.51	4.42317	2.14508	0.00240811	0.024586	yes	up	PNP45979.1(hypothetical protein THARTR1_10852 [Trichoderma harzianum])		K03953	NDUFA9	map00190(Oxidative phosphorylation)	COG0702(A:RNA processing and modification)	COG0702(May be involved in splicing (By similarity))	PF05368.10(NmrA:NmrA-like family); PF01370.18(Epimerase:NAD dependent epimerase/dehydratase family); PF13460.3(NAD_binding_10:NAD(P)H-binding); PF01073.16(3Beta_HSD:3-beta hydroxysteroid dehydrogenase/isomerase family); PF16363.2(GDP_Man_Dehyd:GDP-mannose 4,6 dehydratase); PF04321.14(RmlD_sub_bind:RmlD substrate binding domain); PF00106.22(adh_short:short chain dehydrogenase)	sp|P25284|NDUA9_NEUCR(NADH-ubiquinone oxidoreductase 40 kDa subunit, mitochondrial OS=Neurospora crassa (strain ATCC 24698 / 74-OR23-1A / CBS 708.71 / DSM 1257 / FGSC 987) OX=367110 GN=nuo40 PE=1 SV=2)
525778	hypothetical protein	1407	0	2.09	86.2494	6.43044	0.0023688	0.0242131	yes	up	XP_024767678.1(hypothetical protein M431DRAFT_525778 [Trichoderma harzianum CBS 226.95])	GO:0005215(molecular_function:transporter activity); GO:0016021(cellular_component:integral component of membrane); GO:0055085(biological_process:transmembrane transport)				COG0477(E:Amino acid transport and metabolism); ENOG410XS7E(U:Intracellular trafficking, secretion, and vesicular transport)	COG0477(aminotransferase); ENOG410XS7E(Major Facilitator Superfamily)	PF07690.13(MFS_1:Major Facilitator Superfamily)	sp|Q12256|TPO4_YEAST(Polyamine transporter 4 OS=Saccharomyces cerevisiae (strain ATCC 204508 / S288c) OX=559292 GN=TPO4 PE=1 SV=1)
528349	hypothetical protein	722	18.765	133.935	4.93773	2.30385	0.00232955	0.0238965	yes	up	XP_024777065.1(hypothetical protein M431DRAFT_528349 [Trichoderma harzianum CBS 226.95])					COG3324(S:Function unknown); ENOG410XTPZ(S:Function unknown)	COG3324(glyoxalase bleomycin resistance protein dioxygenase); ENOG410XTPZ(-)	PF00903.22(Glyoxalase:Glyoxalase/Bleomycin resistance protein/Dioxygenase superfamily)
517906	hypothetical protein	1561	0.22	4.775	15.3907	3.94398	0.00229256	0.0235729	yes	up	XP_024778034.1(hypothetical protein M431DRAFT_517906 [Trichoderma harzianum CBS 226.95])	GO:0051213(molecular_function:dioxygenase activity); GO:0055114(biological_process:oxidation-reduction process); GO:0016491(molecular_function:oxidoreductase activity)				ENOG410Z63W(Q:Secondary metabolites biosynthesis, transport and catabolism)	ENOG410Z63W(Taurine catabolism dioxygenase, TauD)	PF02668.13(TauD:Taurine catabolism dioxygenase TauD, TfdA family)	sp|A0A084AFG6|SAT17_STACB(Taurine hydroxylase-like protein SAT17 OS=Stachybotrys chartarum (strain CBS 109288 / IBT 7711) OX=1280523 GN=SAT17 PE=4 SV=1)
99501	hypothetical protein	318	22.46	264.62	7.81169	2.96564	0.00228596	0.0235609	yes	up	XP_024768218.1(hypothetical protein M431DRAFT_99501 [Trichoderma harzianum CBS 226.95])					ENOG410ZGPP(C:Energy production and conversion); ENOG410ZRUG(S:Function unknown); ENOG410ZY4Q(S:Function unknown)	ENOG410ZGPP(alcohol dehydrogenase); ENOG410ZRUG(EthD domain); ENOG410ZY4Q(EthD domain)
123267	hypothetical protein	1044	4.745	38.145	5.49261	2.45749	0.00227081	0.0234326	yes	up	XP_024771183.1(hypothetical protein M431DRAFT_123267 [Trichoderma harzianum CBS 226.95])					ENOG410XRKK(S:Function unknown)	ENOG410XRKK(-)
107071	hypothetical protein	1180	0.1	4.31	28.2178	4.81853	0.00225156	0.0232895	yes	up	PKK48380.1(hypothetical protein CI102_6766 [Trichoderma harzianum])	GO:0045482(molecular_function:trichodiene synthase activity); GO:0016106(biological_process:sesquiterpenoid biosynthetic process)				ENOG410YEIS(S:Function unknown)	ENOG410YEIS(Trichodiene synthase (TRI5))	PF06330.8(TRI5:Trichodiene synthase (TRI5))
8972	hypothetical protein	1341	2.82	25.445	5.86027	2.55097	0.00220906	0.0229594	yes	up	XP_024770612.1(hypothetical protein M431DRAFT_8972 [Trichoderma harzianum CBS 226.95])	GO:0009058(biological_process:biosynthetic process); GO:0016779(molecular_function:nucleotidyltransferase activity)	K00966	GMPP	map00051(Fructose and mannose metabolism); map00520(Amino sugar and nucleotide sugar metabolism)	COG1208(S:Function unknown)	COG1208(U4 u6 small nuclear ribonucleoprotein)	PF00483.20(NTP_transferase:Nucleotidyl transferase); PF12804.4(NTP_transf_3:MobA-like NTP transferase domain); PF00132.21(Hexapep:Bacterial transferase hexapeptide (six repeats))	sp|O60064|YBB2_SCHPO(Probable mannose-1-phosphate guanyltransferase OS=Schizosaccharomyces pombe (strain 972 / ATCC 24843) OX=284812 GN=SPBC13G1.02 PE=3 SV=1)
480080	hypothetical protein	879	13.605	109	5.32535	2.41288	0.00220447	0.0229392	yes	up	XP_024776071.1(hypothetical protein M431DRAFT_480080 [Trichoderma harzianum CBS 226.95])	GO:0005737(cellular_component:cytoplasm); GO:0019773(cellular_component:proteasome core complex, alpha-subunit complex); GO:0005634(cellular_component:nucleus); GO:0010499(biological_process:proteasomal ubiquitin-independent protein catabolic process); GO:0004298(molecular_function:threonine-type endopeptidase activity); GO:0006511(biological_process:ubiquitin-dependent protein catabolic process)…	K02727	PSMA3	map03050(Proteasome)	ENOG410XP01(O:Posttranslational modification, protein turnover, chaperones)	ENOG410XP01(The proteasome is a multicatalytic proteinase complex which is characterized by its ability to cleave peptides with Arg, Phe, Tyr, Leu, and Glu adjacent to the leaving group at neutral or slightly basic pH. The proteasome has an ATP-dependent proteolytic activity (By similarity))	PF00227.23(Proteasome:Proteasome subunit); PF10584.6(Proteasome_A_N:Proteasome subunit A N-terminal signature)	sp|P21242|PSA7_YEAST(Probable proteasome subunit alpha type-7 OS=Saccharomyces cerevisiae (strain ATCC 204508 / S288c) OX=559292 GN=PRE10 PE=1 SV=2)
416406	hypothetical protein	691	0.02	1.76	52.43	5.71232	0.00217672	0.0226777	yes	up	XP_024775732.1(hypothetical protein M431DRAFT_416406 [Trichoderma harzianum CBS 226.95])
489663	hypothetical protein	5502	3.49	29.875	5.49493	2.4581	0.00215726	0.0225265	yes	up	XP_024780552.1(hypothetical protein M431DRAFT_489663 [Trichoderma harzianum CBS 226.95])	GO:0030488(biological_process:tRNA methylation); GO:0034388(cellular_component:Pwp2p-containing subcomplex of 90S preribosome); GO:0072686(cellular_component:mitotic spindle); GO:0044732(cellular_component:mitotic spindle pole body); GO:0016428(molecular_function:tRNA (cytosine-5-)-methyltransferase activity); GO:0032153(cellular_component:cell division site); GO:0032040(cellular_component:small-…	K14554	UTP21, WDR36	map03008(Ribosome biogenesis in eukaryotes)	ENOG410XPJH(S:Function unknown); COG0144(J:Translation, ribosomal structure and biogenesis)	ENOG410XPJH(WD repeat domain 36); COG0144(nOP2 Sun)	PF04192.9(Utp21:Utp21 specific WD40 associated putative domain); PF01189.14(Methyltr_RsmB-F:16S rRNA methyltransferase RsmB/F); PF00400.29(WD40:WD domain, G-beta repeat); PF12894.4(ANAPC4_WD40:Anaphase-promoting complex subunit 4 WD40 domain); PF02239.13(Cytochrom_D1:Cytochrome D1 heme domain)	sp|O13935|TRM4B_SCHPO(Multisite-specific tRNA:(cytosine-C(5))-methyltransferase trm4b OS=Schizosaccharomyces pombe (strain 972 / ATCC 24843) OX=284812 GN=trm4b PE=3 SV=2)
496894	hypothetical protein	1233	13.64	110.3	5.15675	2.36646	0.00215057	0.0224863	yes	up	OAQ96169.1(hypothetical protein LLEC1_02809 [Cordyceps confragosa])	GO:0003746(molecular_function:translation elongation factor activity); GO:0006414(biological_process:translational elongation); GO:0016740(molecular_function:transferase activity)	K03233	EEF1G		COG0625(J:Translation, ribosomal structure and biogenesis)	COG0625(Component of the 90S pre-ribosome involved in the maturation of rRNAs. Required for early cleavages of the pre-RNAs in the 40S ribosomal subunit maturation pathway (By similarity))	PF00647.16(EF1G:Elongation factor 1 gamma, conserved domain); PF00043.22(GST_C:Glutathione S-transferase, C-terminal domain); PF02798.17(GST_N:Glutathione S-transferase, N-terminal domain); PF13410.3(GST_C_2:Glutathione S-transferase, C-terminal domain); PF14497.3(GST_C_3:Glutathione S-transferase, C-terminal domain); PF13417.3(GST_N_3:Glutathione S-transferase, N-terminal domain)	sp|Q4WB03|PSOE_ASPFU(Glutathione S-transferase psoE OS=Neosartorya fumigata (strain ATCC MYA-4609 / Af293 / CBS 101355 / FGSC A1100) OX=330879 GN=psoE PE=1 SV=1)
478058	hypothetical protein	1143	22.875	170.51	5.28988	2.40323	0.0021201	0.0222213	yes	up	XP_024778590.1(hypothetical protein M431DRAFT_478058 [Trichoderma harzianum CBS 226.95])					ENOG410YN01(S:Function unknown); ENOG41117QH(S:Function unknown)	ENOG410YN01(-); ENOG41117QH(-)
95533	hypothetical protein	2469	8.32	67.23	5.0788	2.34449	0.00211597	0.0222049	yes	up	XP_024770009.1(hypothetical protein M431DRAFT_95533 [Trichoderma harzianum CBS 226.95])	GO:0006884(biological_process:cell volume homeostasis); GO:0016310(biological_process:phosphorylation); GO:0016021(cellular_component:integral component of membrane); GO:0016301(molecular_function:kinase activity); GO:0005509(molecular_function:calcium ion binding); GO:0006874(biological_process:cellular calcium ion homeostasis); GO:0055085(biological_process:transmembrane transport); GO:0032541(…				COG0668(G:Carbohydrate transport and metabolism)	COG0668(Transporter)	PF00924.15(MS_channel:Mechanosensitive ion channel)	sp|O74839|YC1B_SCHPO(Uncharacterized MscS family protein C1183.11 OS=Schizosaccharomyces pombe (strain 972 / ATCC 24843) OX=284812 GN=SPCC1183.11 PE=1 SV=1)
73376	hypothetical protein	1614	38.73	258.36	4.49975	2.16984	0.0020418	0.0216626	yes	up	XP_024779846.1(hypothetical protein M431DRAFT_73376 [Trichoderma harzianum CBS 226.95])	GO:0003333(biological_process:amino acid transmembrane transport); GO:0016021(cellular_component:integral component of membrane); GO:0015171(molecular_function:amino acid transmembrane transporter activity)	K03293	TC.AAT		COG0531(G:Carbohydrate transport and metabolism)	COG0531(Channel that permits osmotically driven movement of water in both directions. It is involved in the osmoregulation and in the maintenance of cell turgor during volume expansion in rapidly growing cells. It mediates rapid entry or exit of water in response to abrupt changes in osmolarity (By similarity))	PF00324.18(AA_permease:Amino acid permease); PF13520.3(AA_permease_2:Amino acid permease)	sp|Q9C0V0|YQD2_SCHPO(Probable amino-acid permease PB1C11.02 OS=Schizosaccharomyces pombe (strain 972 / ATCC 24843) OX=284812 GN=SPCPB1C11.02 PE=3 SV=1)
89985	hypothetical protein	594	0.3	11.795	26.9305	4.75117	0.00203007	0.0215645	yes	up	XP_024772429.1(hypothetical protein M431DRAFT_89985 [Trichoderma harzianum CBS 226.95])					COG1186(S:Function unknown); COG0216(S:Function unknown)	COG1186(Nucleotide exchange factor Fes1); COG0216(Nucleotide exchange factor Fes1)	PF00472.17(RF-1:RF-1 domain)	sp|Q9Y811|YONI_SCHPO(Uncharacterized peptide chain release factor-like protein C1105.18c, mitochondrial OS=Schizosaccharomyces pombe (strain 972 / ATCC 24843) OX=284812 GN=SPBC1105.18c PE=3 SV=2)
78185	hypothetical protein	864	8.76	74.79	5.56857	2.47731	0.00202312	0.021517	yes	up	XP_024777928.1(hypothetical protein M431DRAFT_78185 [Trichoderma harzianum CBS 226.95])	GO:0008864(molecular_function:formyltetrahydrofolate deformylase activity); GO:0016742(molecular_function:hydroxymethyl-, formyl- and related transferase activity); GO:0006189(biological_process:'de novo' IMP biosynthetic process); GO:0016597(molecular_function:amino acid binding)	K01433	purU	map00630(Glyoxylate and dicarboxylate metabolism); map00670(One carbon pool by folate)	COG0788(F:Nucleotide transport and metabolism)	COG0788(formyltetrahydrofolate deformylase)	PF00551.16(Formyl_trans_N:Formyl transferase); PF01842.22(ACT:ACT domain)	sp|Q46339|PURU_CORS1(Formyltetrahydrofolate deformylase OS=Corynebacterium sp. (strain P-1) OX=69006 GN=purU PE=3 SV=1)
511536	hypothetical protein	890	32.34	267.395	5.68884	2.50813	0.00199857	0.021306	yes	up	XP_024771150.1(hypothetical protein M431DRAFT_511536 [Trichoderma harzianum CBS 226.95])					COG0693(S:Function unknown); COG4977(K:Transcription)	COG0693(PfpI family); COG4977(Transcriptional regulator, ARAC family)	PF01965.21(DJ-1_PfpI:DJ-1/PfpI family)	sp|Q8G9F9|INHA_PSEPU(Isonitrile hydratase OS=Pseudomonas putida OX=303 GN=inhA PE=1 SV=1)
505979	hypothetical protein	1476	3.25	25.755	5.17504	2.37157	0.00200082	0.021306	yes	up	XP_024775914.1(hypothetical protein M431DRAFT_505979 [Trichoderma harzianum CBS 226.95])	GO:0090114(biological_process:COPII-coated vesicle budding); GO:0043547(biological_process:positive regulation of GTPase activity); GO:0031080(cellular_component:nuclear pore outer ring); GO:0031081(biological_process:nuclear pore distribution); GO:0000139(cellular_component:Golgi membrane); GO:0045893(biological_process:positive regulation of transcription, DNA-templated); GO:0030433(biological_…	K14004	SEC13	map03013(RNA transport); map04141(Protein processing in endoplasmic reticulum)	ENOG410XPFM(U:Intracellular trafficking, secretion, and vesicular transport)	ENOG410XPFM(Component of the coat protein complex II (COPII) which promotes the formation of transport vesicles from the endoplasmic reticulum (ER). The coat has two main functions, the physical deformation of the endoplasmic reticulum membrane into vesicles and the selection of cargo molecules. It also functions as a component of the nuclear pore complex (NPC). NPC components, collectively refer…	PF00400.29(WD40:WD domain, G-beta repeat); PF12894.4(ANAPC4_WD40:Anaphase-promoting complex subunit 4 WD40 domain)	sp|Q7RZF5|SEC13_NEUCR(Protein transport protein sec13 OS=Neurospora crassa (strain ATCC 24698 / 74-OR23-1A / CBS 708.71 / DSM 1257 / FGSC 987) OX=367110 GN=nup-20 PE=3 SV=2)
398162	hypothetical protein	1139	153.48	1259.08	5.49443	2.45797	0.00196177	0.0210193	yes	up	OPB37766.1(CytoplasmicCyclophilin [Trichoderma guizhouense])	GO:0000413(biological_process:protein peptidyl-prolyl isomerization); GO:0006915(biological_process:apoptotic process); GO:0006457(biological_process:protein folding); GO:0005739(cellular_component:mitochondrion); GO:0003755(molecular_function:peptidyl-prolyl cis-trans isomerase activity)	K01802	E5.2.1.8		COG0652(U:Intracellular trafficking, secretion, and vesicular transport)	COG0652(Clathrin interactor 1)	PF00160.18(Pro_isomerase:Cyclophilin type peptidyl-prolyl cis-trans isomerase/CLD)	sp|P10255|CYPH_NEUCR(Peptidyl-prolyl cis-trans isomerase, mitochondrial OS=Neurospora crassa (strain ATCC 24698 / 74-OR23-1A / CBS 708.71 / DSM 1257 / FGSC 987) OX=367110 GN=csr-1 PE=1 SV=1)
492385	hypothetical protein	864	0	3.73	90.2347	6.49561	0.00194652	0.0209305	yes	up	XP_024777823.1(hypothetical protein M431DRAFT_492385 [Trichoderma harzianum CBS 226.95])					ENOG410Y2MX(S:Function unknown)	ENOG410Y2MX(-)
510360	hypothetical protein	789	4.945	42.085	5.96191	2.57577	0.00194832	0.0209305	yes	up	PKK34566.1(hypothetical protein CI102_15359 [Trichoderma harzianum])					ENOG4111YTA(O:Posttranslational modification, protein turnover, chaperones)	ENOG4111YTA(Heat shock protein)	PF00011.18(HSP20:Hsp20/alpha crystallin family)	sp|P40920|HSP30_EMENI(30 kDa heat shock protein OS=Emericella nidulans (strain FGSC A4 / ATCC 38163 / CBS 112.46 / NRRL 194 / M139) OX=227321 GN=hsp30 PE=2 SV=1)
514005	hypothetical protein	1790	2.78	21.965	5.17306	2.37102	0.00194749	0.0209305	yes	up	XP_024767777.1(hypothetical protein M431DRAFT_514005 [Trichoderma harzianum CBS 226.95])	GO:0034399(cellular_component:nuclear periphery); GO:0005829(cellular_component:cytosol); GO:0036129(biological_process:negative regulation of transcription from RNA polymerase II promoter in response to hydrogen peroxide); GO:1902376(biological_process:protein denaturation involved in proteasomal ubiquitin-dependent protein catabolic process); GO:0044710(biological_process:single-organism metabo…				ENOG410YQ2G(S:Function unknown)	ENOG410YQ2G(-)	PF06201.10(PITH:PITH domain); PF00085.17(Thioredoxin:Thioredoxin); PF13905.3(Thioredoxin_8:Thioredoxin-like); PF13098.3(Thioredoxin_2:Thioredoxin-like domain); PF04756.10(OST3_OST6:OST3 / OST6 family, transporter family)	sp|Q9USR1|TXL1_SCHPO(Thioredoxin-like protein 1 OS=Schizosaccharomyces pombe (strain 972 / ATCC 24843) OX=284812 GN=txl1 PE=4 SV=1)
21613	hypothetical protein	1315	4.9	41.7	5.42445	2.43948	0.0019263	0.0208886	yes	up	PNP56885.1(hypothetical protein THARTR1_03032 [Trichoderma harzianum])	GO:0016021(cellular_component:integral component of membrane); GO:0005783(cellular_component:endoplasmic reticulum)				COG5080(L:Replication, recombination and repair)	COG5080(DEAD DEAH box helicase)	PF04893.14(Yip1:Yip1 domain)	sp|Q9P6P8|YIP4_SCHPO(Protein YIP4 OS=Schizosaccharomyces pombe (strain 972 / ATCC 24843) OX=284812 GN=SPAC644.13c PE=1 SV=1)
497410	hypothetical protein	2556	11.875	86.62	4.73115	2.24219	0.00191043	0.0207775	yes	up	XP_024771785.1(hypothetical protein M431DRAFT_497410 [Trichoderma harzianum CBS 226.95])	GO:0005829(cellular_component:cytosol); GO:0016192(biological_process:vesicle-mediated transport); GO:0006886(biological_process:intracellular protein transport); GO:0005198(molecular_function:structural molecule activity); GO:0003824(molecular_function:catalytic activity); GO:0030117(cellular_component:membrane coat); GO:0005634(cellular_component:nucleus)	K17302	COPB2, SEC27		ENOG410XNNY(S:Function unknown)	ENOG410XNNY(coatomer protein complex, subunit beta 2 (beta prime))	PF04053.11(Coatomer_WDAD:Coatomer WD associated region); PF00400.29(WD40:WD domain, G-beta repeat)	sp|P35606|COPB2_HUMAN(Coatomer subunit beta' OS=Homo sapiens OX=9606 GN=COPB2 PE=1 SV=2)
484754	hypothetical protein	333	58.675	401.485	4.77337	2.25501	0.00190351	0.0207542	yes	up	XP_024771481.1(hypothetical protein M431DRAFT_484754 [Trichoderma harzianum CBS 226.95])		K02943	RP-LP2, RPLP2	map03010(Ribosome)	COG2058(S:Function unknown)	COG2058(asparagine-linked glycosylation 6, alpha-1,3-glucosyltransferase homolog (S. cerevisiae))	PF00428.16(Ribosomal_60s:60s Acidic ribosomal protein)	sp|P42037|RLA2_ALTAL(60S acidic ribosomal protein P2 OS=Alternaria alternata OX=5599 GN=ALTA5 PE=1 SV=1)
105444	hypothetical protein	721	82.46	565.59	4.63718	2.21325	0.0018939	0.0207251	yes	up	XP_024780894.1(hypothetical protein M431DRAFT_105444 [Trichoderma harzianum CBS 226.95])	GO:0007031(biological_process:peroxisome organization); GO:0001300(biological_process:chronological cell aging); GO:0016559(biological_process:peroxisome fission); GO:0000266(biological_process:mitochondrial fission); GO:0016021(cellular_component:integral component of membrane); GO:0090141(biological_process:positive regulation of mitochondrial fission); GO:0005777(cellular_component:peroxisome)…	K17969	FIS1, TTC11, MDV2	map04139(Mitophagy - yeast)	ENOG4111PPH(U:Intracellular trafficking, secretion, and vesicular transport)	ENOG4111PPH(fission 1)	PF14853.3(Fis1_TPR_C:Fis1 C-terminal tetratricopeptide repeat); PF14852.3(Fis1_TPR_N:Fis1 N-terminal tetratricopeptide repeat)	sp|Q4IBU4|FIS1_GIBZE(Mitochondrial fission 1 protein OS=Gibberella zeae (strain PH-1 / ATCC MYA-4620 / FGSC 9075 / NRRL 31084) OX=229533 GN=FIS1 PE=3 SV=1)
512968	hypothetical protein	2387	4.515	34.89	4.9653	2.31188	0.00185556	0.020437	yes	up	XP_024768895.1(hypothetical protein M431DRAFT_512968 [Trichoderma harzianum CBS 226.95])					ENOG410Y814(S:Function unknown)	ENOG410Y814(-)
494309	hypothetical protein	261	26.325	160.035	5.21407	2.38241	0.00184885	0.0204048	yes	up	XP_024775544.1(hypothetical protein M431DRAFT_494309 [Trichoderma harzianum CBS 226.95])	GO:0016021(cellular_component:integral component of membrane)				ENOG41122S0(S:Function unknown)	ENOG41122S0(Conserved hypothetical, protein)	PF15879.2(MWFE:NADH-ubiquinone oxidoreductase MWFE subunit)
504621	hypothetical protein	1628	7.65	69.615	5.66985	2.50331	0.00183326	0.0202687	yes	up	XP_024779334.1(hypothetical protein M431DRAFT_504621 [Trichoderma harzianum CBS 226.95])	GO:0005737(cellular_component:cytoplasm); GO:0007017(biological_process:microtubule-based process); GO:0003924(molecular_function:GTPase activity); GO:0005200(molecular_function:structural constituent of cytoskeleton); GO:0046677(biological_process:response to antibiotic); GO:0005874(cellular_component:microtubule); GO:0005525(molecular_function:GTP binding)	K07375	TUBB	map04145(Phagosome)	COG5023(O:Posttranslational modification, protein turnover, chaperones)	COG5023(The proteasome is a multicatalytic proteinase complex which is characterized by its ability to cleave peptides with Arg, Phe, Tyr, Leu, and Glu adjacent to the leaving group at neutral or slightly basic pH. The proteasome has an ATP-dependent proteolytic activity (By similarity))	PF00091.22(Tubulin:Tubulin/FtsZ family, GTPase domain); PF03953.14(Tubulin_C:Tubulin C-terminal domain); PF10644.6(Misat_Tub_SegII:Misato Segment II tubulin-like domain)	sp|Q875L3|TBB1_HYPVI(Tubulin beta-1 chain OS=Hypocrea virens OX=29875 PE=2 SV=1)
514197	hypothetical protein	1290	0.505	8.625	10.9994	3.45935	0.00180971	0.0201109	yes	up	XP_024767429.1(hypothetical protein M431DRAFT_514197 [Trichoderma harzianum CBS 226.95])	GO:0005730(cellular_component:nucleolus); GO:0004527(molecular_function:exonuclease activity); GO:0090305(biological_process:nucleic acid phosphodiester bond hydrolysis); GO:0006364(biological_process:rRNA processing); GO:0003676(molecular_function:nucleic acid binding); GO:0000027(biological_process:ribosomal large subunit assembly)	K18327	REXO4, REX4		COG0847(S:Function unknown)	COG0847(Ribonuclease H2 non-catalytic subunit (Ylr154p-like))	PF00929.21(RNase_T:Exonuclease); PF01612.17(DNA_pol_A_exo1:3'-5' exonuclease)	sp|Q4IEV5|REXO4_GIBZE(RNA exonuclease 4 OS=Gibberella zeae (strain PH-1 / ATCC MYA-4620 / FGSC 9075 / NRRL 31084) OX=229533 GN=REX4 PE=3 SV=1)
3894	hypothetical protein	1401	34.54	223.615	4.81418	2.26729	0.00179876	0.0200407	yes	up	XP_024776454.1(hypothetical protein M431DRAFT_3894 [Trichoderma harzianum CBS 226.95])	GO:0003824(molecular_function:catalytic activity); GO:0009058(biological_process:biosynthetic process); GO:0030170(molecular_function:pyridoxal phosphate binding); GO:0008483(molecular_function:transaminase activity)				COG0436(S:Function unknown)	COG0436(-)	PF00155.18(Aminotran_1_2:Aminotransferase class I and II)	sp|O67781|AAT_AQUAE(Aspartate aminotransferase OS=Aquifex aeolicus (strain VF5) OX=224324 GN=aspC PE=3 SV=1)
489205	hypothetical protein	969	4.045	34.01	5.5616	2.4755	0.00178209	0.019881	yes	up	XP_024780113.1(hypothetical protein M431DRAFT_489205 [Trichoderma harzianum CBS 226.95])		K15303	AKR7		COG0667(S:Function unknown)	COG0667(Domain of unknown function (DUF1772))	PF00248.18(Aldo_ket_red:Aldo/keto reductase family)	sp|Q6Q875|SIRO_LEPMC(Oxidoreductase sirO OS=Leptosphaeria maculans OX=5022 GN=sirO PE=3 SV=1)
77801	hypothetical protein	879	9.625	73.945	5.04911	2.33603	0.00178214	0.019881	yes	up	XP_024777379.1(hypothetical protein M431DRAFT_77801 [Trichoderma harzianum CBS 226.95])	GO:0005829(cellular_component:cytosol); GO:0006890(biological_process:retrograde vesicle-mediated transport, Golgi to ER); GO:0005622(cellular_component:intracellular); GO:0005198(molecular_function:structural molecule activity)	K17268	COPE		ENOG410XS5P(U:Intracellular trafficking, secretion, and vesicular transport)	ENOG410XS5P(Coatomer protein complex, subunit epsilon)	PF04733.11(Coatomer_E:Coatomer epsilon subunit); PF14559.3(TPR_19:Tetratricopeptide repeat); PF13424.3(TPR_12:Tetratricopeptide repeat); PF07719.14(TPR_2:Tetratricopeptide repeat); PF09477.7(Type_III_YscG:Bacterial type II secretion system chaperone protein (type_III_yscG))	sp|Q5ZIK9|COPE_CHICK(Coatomer subunit epsilon OS=Gallus gallus OX=9031 GN=COPE PE=2 SV=1)
90530	hypothetical protein	2016	7.435	77.6	7.11512	2.83089	0.00175685	0.019675	yes	up	XP_024772638.1(hypothetical protein M431DRAFT_90530 [Trichoderma harzianum CBS 226.95])	GO:0003824(molecular_function:catalytic activity); GO:0005684(cellular_component:U2-type spliceosomal complex)				ENOG410YGTC(S:Function unknown)	ENOG410YGTC(CWF19-like 2, cell cycle control (S. pombe))	PF04677.12(CwfJ_C_1:Protein similar to CwfJ C-terminus 1); PF04676.11(CwfJ_C_2:Protein similar to CwfJ C-terminus 2)	sp|Q09909|CWF19_SCHPO(Pre-mRNA-splicing factor cwf19 OS=Schizosaccharomyces pombe (strain 972 / ATCC 24843) OX=284812 GN=cwf19 PE=1 SV=1)
498	hypothetical protein	492	0.21	18.035	55.468	5.79358	0.00175243	0.0196508	yes	up	XP_024780108.1(hypothetical protein M431DRAFT_498 [Trichoderma harzianum CBS 226.95])					ENOG4112BNR(S:Function unknown); ENOG410YSZP(S:Function unknown)	ENOG4112BNR(Domain of unknown function (DUF1772)); ENOG410YSZP(Domain of unknown function (DUF1772))	PF08592.8(DUF1772:Domain of unknown function (DUF1772))
477591	hypothetical protein	600	38.465	273.945	4.94243	2.30522	0.00170729	0.0191943	yes	up	XP_024780896.1(hypothetical protein M431DRAFT_477591 [Trichoderma harzianum CBS 226.95])	GO:0044732(cellular_component:mitotic spindle pole body); GO:0005829(cellular_component:cytosol); GO:0000778(cellular_component:condensed nuclear chromosome kinetochore); GO:0031262(cellular_component:Ndc80 complex); GO:0031617(cellular_component:NMS complex); GO:0000776(cellular_component:kinetochore)	K11557	SPC24		ENOG411283J(S:Function unknown)	ENOG411283J(Kinetochore protein SPC24)	PF08286.8(Spc24:Spc24 subunit of Ndc80)	sp|Q4IBU5|SPC24_GIBZE(Probable kinetochore protein SPC24 OS=Gibberella zeae (strain PH-1 / ATCC MYA-4620 / FGSC 9075 / NRRL 31084) OX=229533 GN=SPC24 PE=3 SV=1)
502258	hypothetical protein	2300	0.27	4.57	10.7146	3.4215	0.00169985	0.0191603	yes	up	XP_024779814.1(hypothetical protein M431DRAFT_502258 [Trichoderma harzianum CBS 226.95])	GO:0016021(cellular_component:integral component of membrane); GO:0055085(biological_process:transmembrane transport)				ENOG410XQE3(U:Intracellular trafficking, secretion, and vesicular transport); COG0477(U:Intracellular trafficking, secretion, and vesicular transport)	ENOG410XQE3(transmembrane transporter activity); COG0477(transmembrane transporter activity)	PF07690.13(MFS_1:Major Facilitator Superfamily)	sp|O94343|YHMA_SCHPO(Uncharacterized MFS-type transporter C1271.10c OS=Schizosaccharomyces pombe (strain 972 / ATCC 24843) OX=284812 GN=SPBC1271.10c PE=1 SV=1)
84435	hypothetical protein	330	28.68	273.2	7.28401	2.86473	0.00169727	0.0191561	yes	up	PKK52900.1(hypothetical protein CI102_3056 [Trichoderma harzianum])					ENOG410Z0SU(S:Function unknown); ENOG410YP0G(S:Function unknown)	ENOG410Z0SU(Allergen Asp); ENOG410YP0G(-)		sp|D4B2H3|ALL7_ARTBC(Allergen Asp f 7 homolog OS=Arthroderma benhamiae (strain ATCC MYA-4681 / CBS 112371) OX=663331 GN=ARB_02701 PE=3 SV=1)
4639	hypothetical protein	522	14.875	123.945	5.65732	2.50012	0.00158379	0.0181352	yes	up	XP_024775352.1(hypothetical protein M431DRAFT_4639 [Trichoderma harzianum CBS 226.95])	GO:0005743(cellular_component:mitochondrial inner membrane); GO:0016020(cellular_component:membrane); GO:0005739(cellular_component:mitochondrion)	K18184	COX20		ENOG4112BPB(S:Function unknown)	ENOG4112BPB(Protein of unknown function (DUF3767))	PF12597.5(DUF3767:Protein of unknown function (DUF3767))	sp|Q75D23|COX20_ASHGO(Cytochrome c oxidase assembly protein COX20, mitochondrial OS=Ashbya gossypii (strain ATCC 10895 / CBS 109.51 / FGSC 9923 / NRRL Y-1056) OX=284811 GN=COX20 PE=3 SV=1)
2620	hypothetical protein	621	6.155	54.785	6.00782	2.58684	0.00157965	0.0181117	yes	up	XP_024777188.1(hypothetical protein M431DRAFT_2620 [Trichoderma harzianum CBS 226.95])		K14294	WIBG, PYM	map03013(RNA transport); map03015(mRNA surveillance pathway)	ENOG41120JF(A:RNA processing and modification)	ENOG41120JF(RNA binding protein Pym)	PF09282.7(Mago-bind:Mago binding)
477855	hypothetical protein	3354	29.29	208.33	4.60205	2.20228	0.00157598	0.0180935	yes	up	XP_024778348.1(hypothetical protein M431DRAFT_477855 [Trichoderma harzianum CBS 226.95])		K20929	GLX		ENOG410XSD2(K:Transcription); ENOG410Y3TC(S:Function unknown); ENOG4111FP9(S:Function unknown)	ENOG410XSD2(Nuclear transcription factor, X-box); ENOG410Y3TC(-); ENOG4111FP9(WSC domain containing)	PF01822.16(WSC:WSC domain); PF07250.8(Glyoxal_oxid_N:Glyoxal oxidase N-terminus); PF09118.8(DUF1929:Domain of unknown function (DUF1929))	sp|D4AUF1|WSCD1_ARTBC(WSC domain-containing protein ARB_07867 OS=Arthroderma benhamiae (strain ATCC MYA-4681 / CBS 112371) OX=663331 GN=ARB_07867 PE=1 SV=1)
513646	hypothetical protein	1840	2.16	31.53	9.23384	3.20693	0.00143464	0.0168537	yes	up	XP_024768090.1(hypothetical protein M431DRAFT_513646 [Trichoderma harzianum CBS 226.95])	GO:0016021(cellular_component:integral component of membrane)				ENOG410Y9TB(S:Function unknown); ENOG410Y9EI(S:Function unknown)	ENOG410Y9TB(CFEM domain); ENOG410Y9EI(CFEM domain)	PF05730.8(CFEM:CFEM domain)
524626	hypothetical protein	733	0	5.37	93.1262	6.54111	0.00142896	0.0168521	yes	up	XP_024769117.1(hypothetical protein M431DRAFT_524626 [Trichoderma harzianum CBS 226.95])	GO:0016021(cellular_component:integral component of membrane)						PF11578.5(DUF3237:Protein of unknown function (DUF3237))
83118	hypothetical protein	3489	12.1	96.93	5.24541	2.39106	0.00134747	0.0161255	yes	up	XP_024775822.1(hypothetical protein M431DRAFT_83118 [Trichoderma harzianum CBS 226.95])	GO:0016021(cellular_component:integral component of membrane); GO:0016746(molecular_function:transferase activity, transferring acyl groups); GO:0008152(biological_process:metabolic process)	K13507	GAT	map00561(Glycerolipid metabolism); map00564(Glycerophospholipid metabolism)	COG0204(S:Function unknown)	COG0204(Heterokaryon incompatibility protein (HET))	PF06999.9(Suc_Fer-like:Sucrase/ferredoxin-like); PF01553.18(Acyltransferase:Acyltransferase)	sp|Q9P7P0|YOL4_SCHPO(Uncharacterized acyltransferase C1718.04 OS=Schizosaccharomyces pombe (strain 972 / ATCC 24843) OX=284812 GN=SPBC1718.04 PE=1 SV=1)
2765	hypothetical protein	2556	9.165	65.875	4.74305	2.24581	0.00133626	0.0160204	yes	up	XP_024777370.1(hypothetical protein M431DRAFT_2765 [Trichoderma harzianum CBS 226.95])	GO:0016021(cellular_component:integral component of membrane)				ENOG410ZD1N(S:Function unknown)	ENOG410ZD1N(Protein of unknown function (DUF3433))	PF11915.5(DUF3433:Protein of unknown function (DUF3433))
149038	hypothetical protein	3702	2.94	29.005	4.9319	2.30214	0.00133215	0.0159932	yes	up	XP_024771364.1(hypothetical protein M431DRAFT_149038 [Trichoderma harzianum CBS 226.95])	GO:0031418(molecular_function:L-ascorbic acid binding); GO:0005634(cellular_component:nucleus); GO:0016705(molecular_function:oxidoreductase activity, acting on paired donors, with incorporation or reduction of molecular oxygen); GO:0006357(biological_process:regulation of transcription from RNA polymerase II promoter); GO:0006351(biological_process:transcription, DNA-templated); GO:0003677(molec…				ENOG410XS5J(S:Function unknown); ENOG410YG7T(K:Transcription); ENOG4110UGX(S:Function unknown); ENOG4110VFV(K:Transcription)	ENOG410XS5J(prolyl 4-hydroxylase); ENOG410YG7T(Fungal Zn(2)-Cys(6) binuclear cluster domain); ENOG4110UGX(Fungal specific transcription factor domain); ENOG4110VFV(Fungal_trans)	PF00172.15(Zn_clus:Fungal Zn(2)-Cys(6) binuclear cluster domain); PF04082.15(Fungal_trans:Fungal specific transcription factor domain); PF13640.3(2OG-FeII_Oxy_3:2OG-Fe(II) oxygenase superfamily)	sp|Q1ERI1|CTNR_MONPU(Citrinin biosynthesis transcriptional activator ctnR OS=Monascus purpureus OX=5098 GN=ctnR PE=3 SV=1)
499756	hypothetical protein	1740	2.25	20.24	5.79065	2.53373	0.00131395	0.0158185	yes	up	XP_024769398.1(hypothetical protein M431DRAFT_499756 [Trichoderma harzianum CBS 226.95])		K12864	CTNNBL1	map03040(Spliceosome)	ENOG410XPFW(S:Function unknown)	ENOG410XPFW(Catenin, beta like 1)	PF08216.8(CTNNBL:Catenin-beta-like, Arm-motif containing nuclear)	sp|Q9UUK1|CTBL1_SCHPO(Beta-catenin-like protein 1 homolog OS=Schizosaccharomyces pombe (strain 972 / ATCC 24843) OX=284812 GN=ctnnbl1 PE=1 SV=1)
511281	hypothetical protein	1355	3	34.795	7.9785	2.99612	0.00127423	0.015426	yes	up	XP_024770834.1(hypothetical protein M431DRAFT_511281 [Trichoderma harzianum CBS 226.95])	GO:0016740(molecular_function:transferase activity)	K00799	GST, gst	map00480(Glutathione metabolism)	COG0625(O:Posttranslational modification, protein turnover, chaperones)	COG0625(glutathione Stransferase)	PF02798.17(GST_N:Glutathione S-transferase, N-terminal domain); PF13417.3(GST_N_3:Glutathione S-transferase, N-terminal domain); PF13409.3(GST_N_2:Glutathione S-transferase, N-terminal domain); PF00043.22(GST_C:Glutathione S-transferase, C-terminal domain); PF14497.3(GST_C_3:Glutathione S-transferase, C-terminal domain); PF13410.3(GST_C_2:Glutathione S-transferase, C-terminal domain)	sp|P77526|YFCG_ECOLI(Disulfide-bond oxidoreductase YfcG OS=Escherichia coli (strain K12) OX=83333 GN=yfcG PE=1 SV=1)
499298	hypothetical protein	324	7.83	70.14	6.07213	2.6022	0.00127002	0.0153965	yes	up	XP_024770157.1(hypothetical protein M431DRAFT_499298 [Trichoderma harzianum CBS 226.95])					ENOG4111C6N(S:Function unknown); ENOG410ZAUJ(S:Function unknown)	ENOG4111C6N(Histone chaperone domain CHZ); ENOG410ZAUJ(Histone chaperone domain CHZ)	PF09649.7(CHZ:Histone chaperone domain CHZ)
6755	hypothetical protein	687	18.835	197.515	6.98533	2.80433	0.00116301	0.0143301	yes	up	KFX47697.1(Elongation factor 1-beta [Talaromyces marneffei PM1])	GO:0003746(molecular_function:translation elongation factor activity); GO:0006414(biological_process:translational elongation); GO:0005853(cellular_component:eukaryotic translation elongation factor 1 complex)	K03232	EEF1B		COG2092(J:Translation, ribosomal structure and biogenesis)	COG2092(Promotes the exchange of GDP for GTP in EF-1-alpha GDP, thus allowing the regeneration of EF-1-alpha GTP that could then be used to form the ternary complex EF-1-alpha GTP AAtRNA (By similarity))	PF00736.16(EF1_GNE:EF-1 guanine nucleotide exchange domain); PF10587.6(EF-1_beta_acid:Eukaryotic elongation factor 1 beta central acidic region)	sp|Q9GRF8|EF1B_DICDI(Elongation factor 1-beta OS=Dictyostelium discoideum OX=44689 GN=efa1B PE=1 SV=1)
433808	hypothetical protein	907	38.995	263.345	4.88137	2.28729	0.00116402	0.0143301	yes	up	OPB44209.1(hypothetical protein A0O28_0025270 [Trichoderma guizhouense])	GO:0016020(cellular_component:membrane)				ENOG4112BC8(S:Function unknown)	ENOG4112BC8(Conserved hypothetical, protein)
545588	hypothetical protein	993	0	3.895	102.065	6.67335	0.00115583	0.0142921	yes	up	XP_024768801.1(hypothetical protein M431DRAFT_545588 [Trichoderma harzianum CBS 226.95])		K06988	fno		COG2085(S:Function unknown)	COG2085(Protein-arginine deiminase (PAD))	PF03807.14(F420_oxidored:NADP oxidoreductase coenzyme F420-dependent); PF03446.12(NAD_binding_2:NAD binding domain of 6-phosphogluconate dehydrogenase); PF07991.9(IlvN:Acetohydroxy acid isomeroreductase, NADPH-binding domain); PF10727.6(Rossmann-like:Rossmann-like domain); PF02153.14(PDH:Prephenate dehydrogenase); PF02826.16(2-Hacid_dh_C:D-isomer specific 2-hydroxyacid dehydrogenase, NAD binding …	sp|Q47719|Y4286_ECOLI(Putative uncharacterized protein b4286 OS=Escherichia coli (strain K12) OX=83333 GN=b4286 PE=5 SV=2)
478385	hypothetical protein	1197	0	2.735	96.9978	6.59988	0.00115341	0.0142826	yes	up	XP_024778968.1(hypothetical protein M431DRAFT_478385 [Trichoderma harzianum CBS 226.95])	GO:0016020(cellular_component:membrane)	K13704	ABHD12		ENOG4112180(I:Lipid transport and metabolism); COG2931(Q:Secondary metabolites biosynthesis, transport and catabolism); ENOG410ZNC0(S:Function unknown); COG1073(S:Function unknown)	ENOG4112180(Abhydrolase domain-containing protein); COG2931(Hemolysin-type calcium-binding); ENOG410ZNC0(peroxisomal membrane protein); COG1073(peroxisomal membrane protein)	PF12697.4(Abhydrolase_6:Alpha/beta hydrolase family); PF12146.5(Hydrolase_4:Serine aminopeptidase, S33); PF00561.17(Abhydrolase_1:alpha/beta hydrolase fold); PF07859.10(Abhydrolase_3:alpha/beta hydrolase fold)	sp|Q08C93|ABD12_DANRE(Monoacylglycerol lipase ABHD12 OS=Danio rerio OX=7955 GN=abhd12 PE=2 SV=1)
74487	hypothetical protein	537	3.925	53.345	8.95873	3.16329	0.00112649	0.0140092	yes	up	XP_024778635.1(hypothetical protein M431DRAFT_74487 [Trichoderma harzianum CBS 226.95])	GO:0008199(molecular_function:ferric iron binding); GO:0055114(biological_process:oxidation-reduction process); GO:0004322(molecular_function:ferroxidase activity); GO:0005739(cellular_component:mitochondrion); GO:0016226(biological_process:iron-sulfur cluster assembly)	K19054	FXN	map00860(Porphyrin and chlorophyll metabolism)	COG1965(P:Inorganic ion transport and metabolism)	COG1965(frataxin-like protein)	PF01491.13(Frataxin_Cyay:Frataxin-like domain)	sp|Q9W385|FRDA_DROME(Frataxin homolog, mitochondrial OS=Drosophila melanogaster OX=7227 GN=fh PE=2 SV=1)
504240	hypothetical protein	1482	11.785	90.275	4.96223	2.31099	0.00111397	0.0138735	yes	up	XP_024778997.1(hypothetical protein M431DRAFT_504240 [Trichoderma harzianum CBS 226.95])	GO:0005737(cellular_component:cytoplasm); GO:0007017(biological_process:microtubule-based process); GO:0003924(molecular_function:GTPase activity); GO:0005200(molecular_function:structural constituent of cytoskeleton); GO:0005874(cellular_component:microtubule); GO:0005525(molecular_function:GTP binding)	K07374	TUBA	map04145(Phagosome)	COG5023(Z:Cytoskeleton)	COG5023(protein polymerization)	PF00091.22(Tubulin:Tubulin/FtsZ family, GTPase domain); PF03953.14(Tubulin_C:Tubulin C-terminal domain); PF14881.3(Tubulin_3:Tubulin domain)	sp|Q9C413|TBA_COLOR(Tubulin alpha chain OS=Colletotrichum orbiculare (strain 104-T / ATCC 96160 / CBS 514.97 / LARS 414 / MAFF 240422) OX=1213857 GN=TUB1 PE=3 SV=2)
507943	hypothetical protein	2963	0	0.925	99.7622	6.64042	0.00111017	0.013866	yes	up	XP_024774189.1(hypothetical protein M431DRAFT_507943 [Trichoderma harzianum CBS 226.95])					ENOG410YEW7(S:Function unknown); ENOG4111SYN(S:Function unknown)	ENOG410YEW7(NACHT domain); ENOG4111SYN(NACHT domain)	PF05729.9(NACHT:NACHT domain); PF17107.2(SesA:N-terminal domain on NACHT_NTPase and P-loop NTPases); PF13191.3(AAA_16:AAA ATPase domain)
83193	hypothetical protein	1233	14.995	165.615	7.6924	2.94343	0.00109433	0.0137076	yes	up	XP_024775677.1(hypothetical protein M431DRAFT_83193 [Trichoderma harzianum CBS 226.95])	GO:0055114(biological_process:oxidation-reduction process); GO:0071949(molecular_function:FAD binding); GO:0016491(molecular_function:oxidoreductase activity)				ENOG410XNUI(S:Function unknown); ENOG410YFGB(U:Intracellular trafficking, secretion, and vesicular transport)	ENOG410XNUI(Fungal Zn(2)-Cys(6) binuclear cluster domain); ENOG410YFGB(FAD binding domain)	PF01494.16(FAD_binding_3:FAD binding domain)	sp|D4B1Y1|A2462_ARTBC(Probable FAD-dependent monooxygenase OS=Arthroderma benhamiae (strain ATCC MYA-4681 / CBS 112371) OX=663331 GN=ARB_02462 PE=3 SV=1)
359382	hypothetical protein	1475	0	2.125	104.529	6.70776	0.00104495	0.0132616	yes	up	XP_024777824.1(hypothetical protein M431DRAFT_359382 [Trichoderma harzianum CBS 226.95])					COG0775(S:Function unknown)	COG0775(-)	PF01048.17(PNP_UDP_1:Phosphorylase superfamily)
507883	hypothetical protein	1757	7.96	66.925	5.38177	2.42808	0.00104037	0.0132228	yes	up	XP_024774113.1(hypothetical protein M431DRAFT_507883 [Trichoderma harzianum CBS 226.95])	GO:0005975(biological_process:carbohydrate metabolic process); GO:0005829(cellular_component:cytosol); GO:0006486(biological_process:protein glycosylation); GO:0005634(cellular_component:nucleus); GO:0004476(molecular_function:mannose-6-phosphate isomerase activity); GO:0009298(biological_process:GDP-mannose biosynthetic process); GO:0008270(molecular_function:zinc ion binding); GO:0000032(biolog…	K01809	manA, MPI	map00051(Fructose and mannose metabolism); map00520(Amino sugar and nucleotide sugar metabolism)	COG1482(S:Function unknown)	COG1482(serine 3-dehydrogenase activity)	PF01238.18(PMI_typeI:Phosphomannose isomerase type I)	sp|Q66WM4|MPI_ASPFU(Mannose-6-phosphate isomerase OS=Neosartorya fumigata (strain ATCC MYA-4609 / Af293 / CBS 101355 / FGSC A1100) OX=330879 GN=pmi1 PE=2 SV=2)
4555	hypothetical protein	3300	0.03	1.515	33.0472	5.04646	0.00102514	0.013106	yes	up	XP_024775243.1(hypothetical protein M431DRAFT_4555 [Trichoderma harzianum CBS 226.95])	GO:0016787(molecular_function:hydrolase activity); GO:0016021(cellular_component:integral component of membrane); GO:0046872(molecular_function:metal ion binding); GO:0005524(molecular_function:ATP binding)	K01539	ATP1A		COG0474(S:Function unknown)	COG0474(-acetyltransferase)	PF00122.17(E1-E2_ATPase:E1-E2 ATPase); PF00689.18(Cation_ATPase_C:Cation transporting ATPase, C-terminus); PF00702.23(Hydrolase:haloacid dehalogenase-like hydrolase); PF13246.3(Cation_ATPase:Cation transport ATPase (P-type)); PF00690.23(Cation_ATPase_N:Cation transporter/ATPase, N-terminus); PF08282.9(Hydrolase_3:haloacid dehalogenase-like hydrolase)	sp|P05023|AT1A1_HUMAN(Sodium/potassium-transporting ATPase subunit alpha-1 OS=Homo sapiens OX=9606 GN=ATP1A1 PE=1 SV=1)
9960	hypothetical protein	1392	0	2.07	99.9278	6.64281	0.00100552	0.0129507	yes	up	XP_024769044.1(hypothetical protein M431DRAFT_9960 [Trichoderma harzianum CBS 226.95])					ENOG4110X6J(S:Function unknown); ENOG410Y0FY(K:Transcription); ENOG410XRVF(K:Transcription)	ENOG4110X6J(-); ENOG410Y0FY(homeobox and C2H2 transcription factor); ENOG410XRVF(Pre-B-cell leukemia homeobox)
512547	hypothetical protein	938	0	4.33	104.995	6.71418	0.00100008	0.0128998	yes	up	XP_024769446.1(hypothetical protein M431DRAFT_512547 [Trichoderma harzianum CBS 226.95])		K01259	pip	map00330(Arginine and proline metabolism)	ENOG4111SWR(S:Function unknown); ENOG4111HDG(S:Function unknown); COG0596(S:Function unknown)	ENOG4111SWR(alpha/beta hydrolase fold); ENOG4111HDG(Alpha beta hydrolase fold protein); COG0596(alpha/beta hydrolase fold)	PF00561.17(Abhydrolase_1:alpha/beta hydrolase fold); PF12697.4(Abhydrolase_6:Alpha/beta hydrolase family); PF12146.5(Hydrolase_4:Serine aminopeptidase, S33); PF08386.7(Abhydrolase_4:TAP-like protein)	sp|B1ZB18|RUTD_METPB(Putative aminoacrylate hydrolase RutD OS=Methylobacterium populi (strain ATCC BAA-705 / NCIMB 13946 / BJ001) OX=441620 GN=rutD PE=3 SV=1)
75577	hypothetical protein	1284	42.02	330.15	5.42565	2.4398	0.000992388	0.012858	yes	up	XP_024778439.1(hypothetical protein M431DRAFT_75577 [Trichoderma harzianum CBS 226.95])	GO:0004674(molecular_function:protein serine/threonine kinase activity); GO:0006468(biological_process:protein phosphorylation); GO:0005524(molecular_function:ATP binding)	K08856	STK16		ENOG410YN06(T:Signal transduction mechanisms)	ENOG410YN06(serine threonine kinase 16)	PF00069.22(Pkinase:Protein kinase domain); PF07714.14(Pkinase_Tyr:Protein tyrosine kinase)	sp|Q12003|ENV7_YEAST(Serine/threonine-protein kinase ENV7 OS=Saccharomyces cerevisiae (strain ATCC 204508 / S288c) OX=559292 GN=ENV7 PE=1 SV=1)
73286	hypothetical protein	1524	1.385	15.08	7.00416	2.80821	0.00098476	0.0127783	yes	up	XP_024780439.1(hypothetical protein M431DRAFT_73286 [Trichoderma harzianum CBS 226.95])					ENOG410XNS1(S:Function unknown)	ENOG410XNS1(MOB family member 4, phocein)	PF03637.14(Mob1_phocein:Mob1/phocein family)	sp|Q7K0E3|MOB4_DROME(MOB kinase activator-like 4 OS=Drosophila melanogaster OX=7227 GN=Mob4 PE=2 SV=1)
86676	hypothetical protein	1113	2.34	22.78	6.46525	2.69271	0.000979303	0.0127265	yes	up	XP_024773422.1(hypothetical protein M431DRAFT_86676 [Trichoderma harzianum CBS 226.95])	GO:0003884(molecular_function:D-amino-acid oxidase activity); GO:0055114(biological_process:oxidation-reduction process); GO:0046416(biological_process:D-amino acid metabolic process); GO:0071949(molecular_function:FAD binding)	K00273	DAO, aao	map00260(Glycine, serine and threonine metabolism); map00311(Penicillin and cephalosporin biosynthesis); map00330(Arginine and proline metabolism); map00472(D-Arginine and D-ornithine metabolism); map04146(Peroxisome)	COG0665(S:Function unknown); COG0526(O:Posttranslational modification, protein turnover, chaperones)	COG0665(Conserved hypothetical, protein); COG0526(Thioredoxin)	PF01266.21(DAO:FAD dependent oxidoreductase)	sp|P24552|OXDA_FUSSO(D-amino-acid oxidase OS=Fusarium solani subsp. pisi OX=70791 PE=1 SV=1)
5551	hypothetical protein	645	9.22	79.84	5.82385	2.54197	0.000955748	0.0124391	yes	up	XP_024774620.1(hypothetical protein M431DRAFT_5551 [Trichoderma harzianum CBS 226.95])	GO:0044425(cellular_component:membrane part); GO:0005739(cellular_component:mitochondrion)				ENOG4112033(A:RNA processing and modification)	ENOG4112033(Cytochrome c oxidase subunit which plays a role in assembly of respiratory supercomplexes (By similarity))	PF04588.10(HIG_1_N:Hypoxia induced protein conserved region)	sp|C7YJ02|RCF1_NECH7(Respiratory supercomplex factor 1, mitochondrial OS=Nectria haematococca (strain 77-13-4 / ATCC MYA-4622 / FGSC 9596 / MPVI) OX=660122 GN=RCF1 PE=3 SV=1)
83409	hypothetical protein	207	0.75	9.945	8.98957	3.16825	0.000892212	0.0119163	yes	up	XP_024775730.1(hypothetical protein M431DRAFT_83409, partial [Trichoderma harzianum CBS 226.95])					ENOG4112AI7(S:Function unknown); ENOG4110V33(S:Function unknown)	ENOG4112AI7(-); ENOG4110V33(-)
497412	hypothetical protein	1659	33.46	277.345	5.55281	2.47322	0.000890916	0.0119163	yes	up	XP_024771787.1(hypothetical protein M431DRAFT_497412 [Trichoderma harzianum CBS 226.95])	GO:0004347(molecular_function:glucose-6-phosphate isomerase activity); GO:0006098(biological_process:pentose-phosphate shunt); GO:0006096(biological_process:glycolytic process); GO:0005739(cellular_component:mitochondrion); GO:0006094(biological_process:gluconeogenesis)	K01810	GPI, pgi	map00010(Glycolysis / Gluconeogenesis); map00030(Pentose phosphate pathway); map00500(Starch and sucrose metabolism); map00520(Amino sugar and nucleotide sugar metabolism)	COG0166(G:Carbohydrate transport and metabolism)	COG0166(glucose-6-phosphate isomerase activity)	PF00342.16(PGI:Phosphoglucose isomerase)	sp|Q7S986|G6PI_NEUCR(Glucose-6-phosphate isomerase OS=Neurospora crassa (strain ATCC 24698 / 74-OR23-1A / CBS 708.71 / DSM 1257 / FGSC 987) OX=367110 GN=pgi-1 PE=3 SV=1)
78390	hypothetical protein	1347	27.425	271.925	6.42264	2.68317	0.000884076	0.0118993	yes	up	XP_024777500.1(hypothetical protein M431DRAFT_78390 [Trichoderma harzianum CBS 226.95])	GO:0004586(molecular_function:ornithine decarboxylase activity); GO:0003824(molecular_function:catalytic activity); GO:0009446(biological_process:putrescine biosynthetic process); GO:0006596(biological_process:polyamine biosynthetic process); GO:0015940(biological_process:pantothenate biosynthetic process)	K01581	E4.1.1.17, ODC1, speC, speF	map00330(Arginine and proline metabolism); map00480(Glutathione metabolism)	COG0019(E:Amino acid transport and metabolism)	COG0019(Specifically catalyzes the decarboxylation of meso- diaminopimelate (meso-DAP) to L-lysine (By similarity))	PF02784.13(Orn_Arg_deC_N:Pyridoxal-dependent decarboxylase, pyridoxal binding domain); PF00278.19(Orn_DAP_Arg_deC:Pyridoxal-dependent decarboxylase, C-terminal sheet domain)	sp|P27121|DCOR_NEUCR(Ornithine decarboxylase OS=Neurospora crassa (strain ATCC 24698 / 74-OR23-1A / CBS 708.71 / DSM 1257 / FGSC 987) OX=367110 GN=spe-1 PE=2 SV=1)
504833	hypothetical protein	2859	0.5	6.355	8.1124	3.02013	0.000868504	0.0117444	yes	up	XP_024776937.1(hypothetical protein M431DRAFT_504833 [Trichoderma harzianum CBS 226.95])	GO:0005737(cellular_component:cytoplasm); GO:0004641(molecular_function:phosphoribosylformylglycinamidine cyclo-ligase activity); GO:0005829(cellular_component:cytosol); GO:0009113(biological_process:purine nucleobase biosynthetic process); GO:0006189(biological_process:'de novo' IMP biosynthetic process); GO:0005524(molecular_function:ATP binding); GO:0046872(molecular_function:metal ion binding…	K11788	ADE5	map00230(Purine metabolism)	COG0150(F:Nucleotide transport and metabolism); COG0151(F:Nucleotide transport and metabolism)	COG0150(phosphoribosylaminoimidazole synthetase); COG0151(Phosphoribosylglycinamide synthetase)	PF01071.16(GARS_A:Phosphoribosylglycinamide synthetase, ATP-grasp (A) domain); PF02769.19(AIRS_C:AIR synthase related protein, C-terminal domain); PF02844.12(GARS_N:Phosphoribosylglycinamide synthetase, N domain); PF02843.13(GARS_C:Phosphoribosylglycinamide synthetase, C domain); PF00586.21(AIRS:AIR synthase related protein, N-terminal domain); PF15632.3(ATPgrasp_Ter:ATP-grasp in the biosynthetic…	sp|Q99148|PUR2_YARLI(Bifunctional purine biosynthetic protein ADE1 OS=Yarrowia lipolytica (strain CLIB 122 / E 150) OX=284591 GN=ADE1 PE=3 SV=1)
492293	hypothetical protein	3318	3.155	26.185	5.46618	2.45053	0.000869857	0.0117444	yes	up	XP_024777728.1(hypothetical protein M431DRAFT_492293 [Trichoderma harzianum CBS 226.95])	GO:0005829(cellular_component:cytosol); GO:0042147(biological_process:retrograde transport, endosome to Golgi)	K17600	VPS54		ENOG410XQ3K(U:Intracellular trafficking, secretion, and vesicular transport)	ENOG410XQ3K(vacuolar protein sorting 54 homolog (S. cerevisiae))	PF07928.9(Vps54:Vps54-like protein); PF10475.6(Vps54_N:Vacuolar-sorting protein 54, of GARP complex)	sp|F4JT76|VPS54_ARATH(Vacuolar protein sorting-associated protein 54, chloroplastic OS=Arabidopsis thaliana OX=3702 GN=VPS54 PE=1 SV=1)
493087	hypothetical protein	438	1.73	39.33	14.9344	3.90056	0.000829653	0.0113251	yes	up	XP_024776291.1(hypothetical protein M431DRAFT_493087 [Trichoderma harzianum CBS 226.95])	GO:0043547(biological_process:positive regulation of GTPase activity); GO:1990070(cellular_component:TRAPPI protein complex); GO:1990071(cellular_component:TRAPPII protein complex); GO:1990072(cellular_component:TRAPPIII protein complex); GO:0006810(biological_process:transport); GO:0017112(molecular_function:Rab guanyl-nucleotide exchange factor activity); GO:0030008(cellular_component:TRAPP com…	K20300	TRAPPC1, BET5		ENOG4111X41(U:Intracellular trafficking, secretion, and vesicular transport)	ENOG4111X41(trafficking protein particle complex)	PF04099.9(Sybindin:Sybindin-like family)	sp|Q9UT70|BET5_SCHPO(Transport protein particle subunit bet5 OS=Schizosaccharomyces pombe (strain 972 / ATCC 24843) OX=284812 GN=bet5 PE=3 SV=2)
73854	hypothetical protein	1677	0.365	6.155	10.8221	3.4359	0.000821942	0.0112553	yes	up	XP_024778778.1(hypothetical protein M431DRAFT_73854 [Trichoderma harzianum CBS 226.95])	GO:0005869(cellular_component:dynactin complex)	K10426	DCTN4		ENOG410ZCK8(S:Function unknown); COG0415(S:Function unknown)	ENOG410ZCK8(DyNactin); COG0415(DyNactin)	PF05502.10(Dynactin_p62:Dynactin p62 family)	sp|Q9UJW0|DCTN4_HUMAN(Dynactin subunit 4 OS=Homo sapiens OX=9606 GN=DCTN4 PE=1 SV=1)
88636	hypothetical protein	642	4.365	47.865	7.32036	2.87191	0.000808206	0.0111023	yes	up	OPB46232.1(CHD5 domain-containing protein [Trichoderma guizhouense])	GO:0043529(cellular_component:GET complex); GO:0016021(cellular_component:integral component of membrane); GO:0006810(biological_process:transport); GO:0071816(biological_process:tail-anchored membrane protein insertion into ER membrane); GO:0005789(cellular_component:endoplasmic reticulum membrane)				ENOG41120B0(U:Intracellular trafficking, secretion, and vesicular transport)	ENOG41120B0(Required for the post-translational delivery of tail- anchored (TA) proteins to the endoplasmic reticulum. Acts as a membrane receptor for soluble get3, which recognizes and selectively binds the transmembrane domain of TA proteins in the cytosol (By similarity))	PF04420.11(CHD5:CHD5-like protein)	sp|A4RHX3|GET1_MAGO7(Protein GET1 OS=Magnaporthe oryzae (strain 70-15 / ATCC MYA-4617 / FGSC 8958) OX=242507 GN=GET1 PE=3 SV=2)
322079	hypothetical protein	2055	13.225	111.6	5.48476	2.45543	0.000749573	0.0104626	yes	up	XP_024768558.1(hypothetical protein M431DRAFT_322079 [Trichoderma harzianum CBS 226.95])	GO:0010494(cellular_component:cytoplasmic stress granule); GO:0000184(biological_process:nuclear-transcribed mRNA catabolic process, nonsense-mediated decay); GO:0043488(biological_process:regulation of mRNA stability); GO:0034063(biological_process:stress granule assembly); GO:0005634(cellular_component:nucleus); GO:0000932(cellular_component:cytoplasmic mRNA processing body); GO:0000166(molecul…	K13201	TIA1, TIAL1		ENOG410XQ8U(S:Function unknown)	ENOG410XQ8U(TIA1 cytotoxic granule-associated RNA binding)	PF00076.19(RRM_1:RNA recognition motif. (a.k.a. RRM, RBD, or RNP domain)); PF13893.3(RRM_5:RNA recognition motif. (a.k.a. RRM, RBD, or RNP domain)); PF16842.2(RRM_occluded:Occluded RNA-recognition motif); PF14605.3(Nup35_RRM_2:Nup53/35/40-type RNA recognition motif)	sp|Q9SYG4|UBP1A_ARATH(Oligouridylate-binding protein 1A OS=Arabidopsis thaliana OX=3702 GN=UBP1A PE=1 SV=1)
148310	hypothetical protein	1484	5.08	43.815	5.61198	2.48851	0.000744	0.0104184	yes	up	XP_024771982.1(hypothetical protein M431DRAFT_148310 [Trichoderma harzianum CBS 226.95])	GO:0045703(molecular_function:ketoreductase activity); GO:0016021(cellular_component:integral component of membrane); GO:0030497(biological_process:fatty acid elongation); GO:0055114(biological_process:oxidation-reduction process); GO:0005789(cellular_component:endoplasmic reticulum membrane)	K10251	HSD17B12, KAR, IFA38	map00062(Fatty acid elongation); map01040(Biosynthesis of unsaturated fatty acids)	COG0300(S:Function unknown)	COG0300(Chromosome 14 open reading frame 1)	PF00106.22(adh_short:short chain dehydrogenase); PF13561.3(adh_short_C2:Enoyl-(Acyl carrier protein) reductase); PF08659.7(KR:KR domain)	sp|Q2H1V7|MKAR_CHAGB(Very-long-chain 3-oxoacyl-CoA reductase OS=Chaetomium globosum (strain ATCC 6205 / CBS 148.51 / DSM 1962 / NBRC 6347 / NRRL 1970) OX=306901 GN=CHGG_04239 PE=3 SV=1)
63045	hypothetical protein	453	12.02	112.695	6.68552	2.74104	0.000737056	0.0103546	yes	up	PKK54445.1(hypothetical protein CI102_931 [Trichoderma harzianum])					ENOG410Y4CE(S:Function unknown)	ENOG410Y4CE(-)
510516	hypothetical protein	1562	2.455	23.14	6.13508	2.61708	0.000730745	0.0103248	yes	up	KUI68422.1(tRNA-aminoacylation cofactor ARC1 [Valsa mali])	GO:0004812(molecular_function:aminoacyl-tRNA ligase activity); GO:0000049(molecular_function:tRNA binding)	K15437	AIMP1, ARC1		COG0073(J:Translation, ribosomal structure and biogenesis)	COG0073(Is required not only for elongation of protein synthesis but also for the initiation of all mRNA translation through initiator tRNA(fMet) aminoacylation (By similarity))	PF01588.17(tRNA_bind:Putative tRNA binding domain); PF13410.3(GST_C_2:Glutathione S-transferase, C-terminal domain)	sp|P46672|ARC1_YEAST(tRNA-aminoacylation cofactor ARC1 OS=Saccharomyces cerevisiae (strain ATCC 204508 / S288c) OX=559292 GN=ARC1 PE=1 SV=2)
7965	hypothetical protein	2655	8.89	69.22	5.13963	2.36166	0.000731745	0.0103248	yes	up	XP_024771290.1(hypothetical protein M431DRAFT_7965 [Trichoderma harzianum CBS 226.95])	GO:0035194(biological_process:posttranscriptional gene silencing by RNA); GO:0005829(cellular_component:cytosol); GO:0016442(cellular_component:RISC complex); GO:0003712(molecular_function:transcription cofactor activity); GO:1903506(biological_process:regulation of nucleic acid-templated transcription)	K15979	SND1		COG1525(P:Inorganic ion transport and metabolism)	COG1525(Destroys radicals which are normally produced within the cells and which are toxic to biological systems (By similarity))	PF00565.14(SNase:Staphylococcal nuclease homologue); PF00567.21(TUDOR:Tudor domain)	sp|Q9Y7U7|SND1_SCHPO(Staphylococcal nuclease domain-containing protein 1 OS=Schizosaccharomyces pombe (strain 972 / ATCC 24843) OX=284812 GN=snd1 PE=1 SV=1)
7593	hypothetical protein	1698	5.115	42.425	5.53224	2.46786	0.000722855	0.0102381	yes	up	XP_024771817.1(hypothetical protein M431DRAFT_7593 [Trichoderma harzianum CBS 226.95])		K17807	TAM41, MMP37		ENOG410ZNKE(U:Intracellular trafficking, secretion, and vesicular transport)	ENOG410ZNKE(TAM41, mitochondrial translocator assembly and maintenance protein, homolog (S. cerevisiae))	PF09139.8(Mmp37:Mitochondrial matrix Mmp37)	sp|O74339|TAM41_SCHPO(Phosphatidate cytidylyltransferase, mitochondrial OS=Schizosaccharomyces pombe (strain 972 / ATCC 24843) OX=284812 GN=tam41 PE=1 SV=3)
506053	hypothetical protein	1768	5.73	70.255	7.65237	2.93591	0.000719288	0.010221	yes	up	XP_024747922.1(tubulin beta chain 2 [Trichoderma citrinoviride])	GO:0005737(cellular_component:cytoplasm); GO:0007017(biological_process:microtubule-based process); GO:0003924(molecular_function:GTPase activity); GO:0005200(molecular_function:structural constituent of cytoskeleton); GO:0005874(cellular_component:microtubule); GO:0005525(molecular_function:GTP binding)	K07375	TUBB	map04145(Phagosome)	COG5023(S:Function unknown)	COG5023(Ankyrin Repeat)	PF00091.22(Tubulin:Tubulin/FtsZ family, GTPase domain); PF03953.14(Tubulin_C:Tubulin C-terminal domain); PF10644.6(Misat_Tub_SegII:Misato Segment II tubulin-like domain)	sp|Q875L2|TBB2_HYPVI(Tubulin beta-2 chain OS=Hypocrea virens OX=29875 PE=2 SV=1)
149339	hypothetical protein	1140	5.675	79.165	9.05189	3.17822	0.00070722	0.0100748	yes	up	XP_024771516.1(hypothetical protein M431DRAFT_149339 [Trichoderma harzianum CBS 226.95])					ENOG4111N8U(S:Function unknown)	ENOG4111N8U(Conserved hypothetical, protein)		sp|Q9HDU7|YHE8_SCHPO(UPF0643 protein PB2B2.08 OS=Schizosaccharomyces pombe (strain 972 / ATCC 24843) OX=284812 GN=SPBPB2B2.08 PE=3 SV=1)
178103	glycosyltransferase family 39 protein	3105	6.075	55.075	5.76769	2.52799	0.000691723	0.00992691	yes	up	XP_024780032.1(glycosyltransferase family 39 protein [Trichoderma harzianum CBS 226.95])	GO:0016021(cellular_component:integral component of membrane); GO:0035269(biological_process:protein O-linked mannosylation); GO:0004169(molecular_function:dolichyl-phosphate-mannose-protein mannosyltransferase activity)	K00728	POMT, pmt	map00514(Other types of O-glycan biosynthesis)	COG1928(O:Posttranslational modification, protein turnover, chaperones)	COG1928(dolichyl-phosphate-mannose-protein mannosyltransferase activity)	PF02366.15(PMT:Dolichyl-phosphate-mannose-protein mannosyltransferase); PF16192.2(PMT_4TMC:C-terminal four TMM region of protein-O-mannosyltransferase); PF02815.16(MIR:MIR domain)	sp|O74189|PMT1_CANAL(Dolichyl-phosphate-mannose--protein mannosyltransferase 1 OS=Candida albicans (strain SC5314 / ATCC MYA-2876) OX=237561 GN=PMT1 PE=2 SV=1)
226962	hypothetical protein	630	38.845	314.755	5.60396	2.48645	0.000677122	0.00974966	yes	up	PKK43757.1(hypothetical protein CI102_12512 [Trichoderma harzianum])
506734	hypothetical protein	1285	36.705	285.23	5.24223	2.39018	0.000668422	0.00968877	yes	up	XP_024776672.1(hypothetical protein M431DRAFT_506734 [Trichoderma harzianum CBS 226.95])					ENOG410YMME(S:Function unknown); ENOG4110U6C(S:Function unknown); ENOG4110WW1(S:Function unknown)	ENOG410YMME(-); ENOG4110U6C(-); ENOG4110WW1(-)	PF16541.2(AltA1:Alternaria alternata allergen 1)
93167	hypothetical protein	711	20.455	171.525	5.54377	2.47087	0.000656079	0.0095578	yes	up	XP_024770739.1(hypothetical protein M431DRAFT_93167 [Trichoderma harzianum CBS 226.95])	GO:0016192(biological_process:vesicle-mediated transport); GO:0031505(biological_process:fungal-type cell wall organization); GO:0006886(biological_process:intracellular protein transport); GO:0005198(molecular_function:structural molecule activity); GO:0030130(cellular_component:clathrin coat of trans-Golgi network vesicle); GO:0045807(biological_process:positive regulation of endocytosis); GO:0…				ENOG4111J5K(U:Intracellular trafficking, secretion, and vesicular transport)	ENOG4111J5K(clathrin light chain)	PF01086.14(Clathrin_lg_ch:Clathrin light chain)	sp|Q9USP6|CLC1_SCHPO(Clathrin light chain OS=Schizosaccharomyces pombe (strain 972 / ATCC 24843) OX=284812 GN=clc1 PE=1 SV=1)
518518	hypothetical protein	1595	1.225	14.075	7.44981	2.8972	0.000641361	0.00940663	yes	up	XP_024776461.1(hypothetical protein M431DRAFT_518518 [Trichoderma harzianum CBS 226.95])					ENOG410YRHT(S:Function unknown); ENOG4110VYY(S:Function unknown)	ENOG410YRHT(Conserved hypothetical, protein); ENOG4110VYY(-)
537362	hypothetical protein	2703	66.33	526.25	5.1543	2.36578	0.00061217	0.00899372	yes	up	PKK53387.1(hypothetical protein CI102_3012, partial [Trichoderma harzianum])					ENOG4111MV9(S:Function unknown)	ENOG4111MV9(extracellular serine-threonine rich protein)	PF05730.8(CFEM:CFEM domain)
38570	hypothetical protein	558	0	10.47	112.318	6.81145	0.000604215	0.00889914	yes	up	XP_024773629.1(hypothetical protein M431DRAFT_38570, partial [Trichoderma harzianum CBS 226.95])	GO:0016021(cellular_component:integral component of membrane)				ENOG410ZKA3(S:Function unknown); ENOG41126SY(S:Function unknown); ENOG4110U22(S:Function unknown)	ENOG410ZKA3(Increased loss of mitochondrial DNA protein 1); ENOG41126SY(Increased loss of mitochondrial DNA protein 1); ENOG4110U22(Increased loss of mitochondrial DNA protein 1)	PF10311.6(Ilm1:Increased loss of mitochondrial DNA protein 1)
280352	hypothetical protein	1340	0	2.695	115.739	6.85473	0.000576409	0.00857	yes	up	XP_024778231.1(hypothetical protein M431DRAFT_280352 [Trichoderma harzianum CBS 226.95])					COG0666(S:Function unknown); COG0775(S:Function unknown)	COG0666(Ankyrin Repeat); COG0775(Ankyrin Repeat)	PF01048.17(PNP_UDP_1:Phosphorylase superfamily)
503429	hypothetical protein	968	30.915	283.45	6.04151	2.59491	0.000556926	0.00835196	yes	up	KND90304.1(Eukaryotic translation initiation factor 5A, partial [Tolypocladium ophioglossoides CBS 100239])	GO:0006452(biological_process:translational frameshifting); GO:0045901(biological_process:positive regulation of translational elongation); GO:0045905(biological_process:positive regulation of translational termination); GO:0003746(molecular_function:translation elongation factor activity); GO:0043022(molecular_function:ribosome binding); GO:0006413(biological_process:translational initiation); G…	K03263	EIF5A		COG0231(J:Translation, ribosomal structure and biogenesis)	COG0231(Involved in peptide bond synthesis. Stimulates efficient translation and peptide-bond synthesis on native or reconstituted 70S ribosomes in vitro. Probably functions indirectly by altering the affinity of the ribosome for aminoacyl-tRNA, thus increasing their reactivity as acceptors for peptidyl transferase (By similarity))	PF01287.17(eIF-5a:Eukaryotic elongation factor 5A hypusine, DNA-binding OB fold)	sp|O94083|IF5A_CANAL(Eukaryotic translation initiation factor 5A OS=Candida albicans (strain SC5314 / ATCC MYA-2876) OX=237561 GN=ANB1 PE=3 SV=2)
288414	hypothetical protein	1148	9.095	80.575	6.05717	2.59864	0.00054852	0.00825447	yes	up	XP_024778532.1(hypothetical protein M431DRAFT_288414 [Trichoderma harzianum CBS 226.95])
489472	hypothetical protein	2784	15.85	135.175	5.71347	2.51437	0.000540537	0.00814848	yes	up	XP_024780377.1(hypothetical protein M431DRAFT_489472 [Trichoderma harzianum CBS 226.95])	GO:0003824(molecular_function:catalytic activity)	K01115	PLD1_2	map00564(Glycerophospholipid metabolism); map00565(Ether lipid metabolism); map04144(Endocytosis)	COG1502(I:Lipid transport and metabolism)	COG1502(Catalyzes the reversible phosphatidyl group transfer from one phosphatidylglycerol molecule to another to form cardiolipin (CL) (diphosphatidylglycerol) and glycerol (By similarity))	PF13091.3(PLDc_2:PLD-like domain); PF00614.19(PLDc:Phospholipase D Active site motif)	sp|P36126|SPO14_YEAST(Phospholipase D1 OS=Saccharomyces cerevisiae (strain ATCC 204508 / S288c) OX=559292 GN=SPO14 PE=1 SV=3)
117253	hypothetical protein	2527	2.71	27.8	6.6405	2.73129	0.000522755	0.00792593	yes	up	XP_024773478.1(hypothetical protein M431DRAFT_117253 [Trichoderma harzianum CBS 226.95])	GO:0016021(cellular_component:integral component of membrane)	K17086	TM9SF2_4		ENOG410XPIW(K:Transcription)	ENOG410XPIW(Vitamin-D-receptor interacting Mediator subunit 4)	PF02990.13(EMP70:Endomembrane protein 70)	sp|P32802|TMN1_YEAST(Transmembrane 9 superfamily member 1 OS=Saccharomyces cerevisiae (strain ATCC 204508 / S288c) OX=559292 GN=EMP70 PE=1 SV=2)
499871	hypothetical protein	1473	4.785	50.76	6.82663	2.77117	0.000512301	0.007818	yes	up	XP_024769531.1(hypothetical protein M431DRAFT_499871 [Trichoderma harzianum CBS 226.95])	GO:0016021(cellular_component:integral component of membrane); GO:0016020(cellular_component:membrane)				ENOG410YUBE(S:Function unknown); COG0328(S:Function unknown); ENOG4110WY5(S:Function unknown)	ENOG410YUBE(-); COG0328(-); ENOG4110WY5(-)
482810	hypothetical protein	1677	3.615	33.58	6.01942	2.58962	0.000486056	0.0074701	yes	up	XP_024773646.1(hypothetical protein M431DRAFT_482810 [Trichoderma harzianum CBS 226.95])	GO:0005737(cellular_component:cytoplasm); GO:0005829(cellular_component:cytosol); GO:0004827(molecular_function:proline-tRNA ligase activity); GO:0006433(biological_process:prolyl-tRNA aminoacylation); GO:0005524(molecular_function:ATP binding)	K01881	PARS, proS	map00970(Aminoacyl-tRNA biosynthesis)	COG0442(S:Function unknown)	COG0442(-)	PF09180.8(ProRS-C_1:Prolyl-tRNA synthetase, C-terminal); PF00587.22(tRNA-synt_2b:tRNA synthetase class II core domain (G, H, P, S and T)); PF03129.17(HGTP_anticodon:Anticodon binding domain)	sp|P38708|YHI0_YEAST(Putative proline--tRNA ligase YHR020W OS=Saccharomyces cerevisiae (strain ATCC 204508 / S288c) OX=559292 GN=YHR020W PE=1 SV=1)
512999	glycosyltransferase family 90 protein	3354	1.47	16.02	7.5122	2.90924	0.000460254	0.00714426	yes	up	XP_024768922.1(glycosyltransferase family 90 protein [Trichoderma harzianum CBS 226.95])	GO:0016021(cellular_component:integral component of membrane); GO:0016020(cellular_component:membrane); GO:0016740(molecular_function:transferase activity)				ENOG410YAIB(S:Function unknown)	ENOG410YAIB(Glycosyltransferase family 90 protein)	PF05686.9(Glyco_transf_90:Glycosyl transferase family 90)	sp|Q5K8R6|CXT1_CRYNJ(Beta-1,2-xylosyltransferase 1 OS=Cryptococcus neoformans var. neoformans serotype D (strain JEC21 / ATCC MYA-565) OX=214684 GN=CXT1 PE=1 SV=1)
511247	hypothetical protein	1669	9.375	95.245	6.87915	2.78223	0.000460734	0.00714426	yes	up	PKK53225.1(hypothetical protein CI102_2996 [Trichoderma harzianum])		K18732	SARNP, CIP29, THO1		ENOG410XZFD(S:Function unknown); ENOG4112BBP(S:Function unknown)	ENOG410XZFD(SAP domain); ENOG4112BBP(SAP domain protein)	PF02037.24(SAP:SAP domain)
292244	hypothetical protein	1907	9.77	101.325	5.84755	2.54783	0.000447734	0.00698014	yes	up	XP_024778660.1(hypothetical protein M431DRAFT_292244 [Trichoderma harzianum CBS 226.95])	GO:0005737(cellular_component:cytoplasm); GO:0006457(biological_process:protein folding); GO:0005634(cellular_component:nucleus); GO:0051082(molecular_function:unfolded protein binding); GO:0005832(cellular_component:chaperonin-containing T-complex); GO:0005524(molecular_function:ATP binding)	K09495	CCT3, TRIC5		COG0459(O:Posttranslational modification, protein turnover, chaperones)	COG0459(Prevents misfolding and promotes the refolding and proper assembly of unfolded polypeptides generated under stress conditions (By similarity))	PF00118.21(Cpn60_TCP1:TCP-1/cpn60 chaperonin family)	sp|O74341|TCPG_SCHPO(T-complex protein 1 subunit gamma OS=Schizosaccharomyces pombe (strain 972 / ATCC 24843) OX=284812 GN=cct3 PE=1 SV=1)
95161	hypothetical protein	606	10.295	104.46	6.687	2.74136	0.000444158	0.00694938	yes	up	XP_024770205.1(hypothetical protein M431DRAFT_95161 [Trichoderma harzianum CBS 226.95])	GO:0008565(molecular_function:protein transporter activity); GO:0005829(cellular_component:cytosol); GO:0030904(cellular_component:retromer complex); GO:0030906(cellular_component:retromer, cargo-selective complex); GO:0042147(biological_process:retrograde transport, endosome to Golgi); GO:0015031(biological_process:protein transport); GO:0005634(cellular_component:nucleus); GO:0005768(cellular_c…	K18467	VPS29	map04144(Endocytosis)	COG0622(S:Function unknown)	COG0622(Phosphodiesterase, mj0936 family)	PF12850.4(Metallophos_2:Calcineurin-like phosphoesterase superfamily domain)	sp|Q9UTI5|VPS29_SCHPO(Vacuolar protein sorting-associated protein 29 OS=Schizosaccharomyces pombe (strain 972 / ATCC 24843) OX=284812 GN=vps29 PE=3 SV=1)
90152	hypothetical protein	1602	0.56	8.435	9.97085	3.31772	0.000416999	0.00654809	yes	up	XP_024772351.1(hypothetical protein M431DRAFT_90152 [Trichoderma harzianum CBS 226.95])	GO:0003333(biological_process:amino acid transmembrane transport); GO:0016021(cellular_component:integral component of membrane); GO:0015171(molecular_function:amino acid transmembrane transporter activity)				COG0531(S:Function unknown)	COG0531(-)	PF13520.3(AA_permease_2:Amino acid permease); PF00324.18(AA_permease:Amino acid permease)	sp|Q9UT18|THI9_SCHPO(Thiamine transporter thi9 OS=Schizosaccharomyces pombe (strain 972 / ATCC 24843) OX=284812 GN=thi9 PE=1 SV=1)
510929	hypothetical protein	3667	0.895	9.83	7.13215	2.83434	0.000416533	0.00654809	yes	up	XP_024771458.1(hypothetical protein M431DRAFT_510929 [Trichoderma harzianum CBS 226.95])	GO:0003824(molecular_function:catalytic activity); GO:0016021(cellular_component:integral component of membrane); GO:0051377(molecular_function:mannose-ethanolamine phosphotransferase activity); GO:0008152(biological_process:metabolic process); GO:0006506(biological_process:GPI anchor biosynthetic process)	K05288	PIGO	map00563(Glycosylphosphatidylinositol (GPI)-anchor biosynthesis)	COG1524(S:Function unknown)	COG1524(type i phosphodiesterase nucleotide pyrophosphatase)	PF01663.19(Phosphodiest:Type I phosphodiesterase / nucleotide pyrophosphatase)	sp|Q07830|GPI13_YEAST(GPI ethanolamine phosphate transferase 3 OS=Saccharomyces cerevisiae (strain ATCC 204508 / S288c) OX=559292 GN=GPI13 PE=1 SV=1)
513968	hypothetical protein	880	15.88	166.665	6.88625	2.78372	0.000402102	0.0064046	yes	up	XP_013955701.1(hypothetical protein TRIVIDRAFT_83701 [Trichoderma virens Gv29-8])	GO:0046540(cellular_component:U4/U6 x U5 tri-snRNP complex); GO:0032040(cellular_component:small-subunit processome); GO:0031428(cellular_component:box C/D snoRNP complex); GO:0005840(cellular_component:ribosome); GO:0005730(cellular_component:nucleolus); GO:0042254(biological_process:ribosome biogenesis); GO:0000398(biological_process:mRNA splicing, via spliceosome); GO:0030529(cellular_componen…	K12845	SNU13, NHP2L	map03008(Ribosome biogenesis in eukaryotes); map03040(Spliceosome)	COG1358(L:Replication, recombination and repair)	COG1358(Excision repair cross-complementing rodent repair deficiency, complementation group 1 (Includes overlapping antisense sequence))	PF01248.23(Ribosomal_L7Ae:Ribosomal protein L7Ae/L30e/S12e/Gadd45 family)	sp|Q4P0K3|SNU13_USTMA(13 kDa ribonucleoprotein-associated protein OS=Ustilago maydis (strain 521 / FGSC 9021) OX=237631 GN=SNU13 PE=3 SV=1)
508001	hypothetical protein	1390	7.365	64.825	6.34198	2.66493	0.000402282	0.0064046	yes	up	XP_024774267.1(hypothetical protein M431DRAFT_508001 [Trichoderma harzianum CBS 226.95])	GO:0030148(biological_process:sphingolipid biosynthetic process); GO:0016021(cellular_component:integral component of membrane); GO:0042284(molecular_function:sphingolipid delta-4 desaturase activity); GO:0055114(biological_process:oxidation-reduction process)	K04712	DEGS	map00600(Sphingolipid metabolism)	ENOG410XQVT(I:Lipid transport and metabolism)	ENOG410XQVT(sphingolipid delta-4 desaturase activity)	PF00487.21(FA_desaturase:Fatty acid desaturase); PF08557.7(Lipid_DES:Sphingolipid Delta4-desaturase (DES))	sp|O59715|DEGS_SCHPO(Sphingolipid delta(4)-desaturase OS=Schizosaccharomyces pombe (strain 972 / ATCC 24843) OX=284812 GN=dsd1 PE=1 SV=1)
504589	hypothetical protein	1128	17.125	160.43	6.18103	2.62785	0.000377165	0.00609937	yes	up	XP_013950784.1(hypothetical protein TRIVIDRAFT_183933 [Trichoderma virens Gv29-8])	GO:0005737(cellular_component:cytoplasm); GO:0051603(biological_process:proteolysis involved in cellular protein catabolic process); GO:0005839(cellular_component:proteasome core complex); GO:0043161(biological_process:proteasome-mediated ubiquitin-dependent protein catabolic process); GO:0005634(cellular_component:nucleus); GO:0061133(molecular_function:endopeptidase activator activity); GO:0010…	K02735	PSMB3	map03050(Proteasome)	ENOG410XSC8(O:Posttranslational modification, protein turnover, chaperones)	ENOG410XSC8(The proteasome is a multicatalytic proteinase complex which is characterized by its ability to cleave peptides with Arg, Phe, Tyr, Leu, and Glu adjacent to the leaving group at neutral or slightly basic pH. The proteasome has an ATP-dependent proteolytic activity (By similarity))	PF00227.23(Proteasome:Proteasome subunit)	sp|P25451|PSB3_YEAST(Proteasome subunit beta type-3 OS=Saccharomyces cerevisiae (strain ATCC 204508 / S288c) OX=559292 GN=PUP3 PE=1 SV=1)
83707	hypothetical protein	1272	4.125	50.48	8.05128	3.00922	0.000376084	0.00609327	yes	up	XP_024775700.1(hypothetical protein M431DRAFT_83707 [Trichoderma harzianum CBS 226.95])	GO:0016740(molecular_function:transferase activity); GO:0031314(cellular_component:extrinsic component of mitochondrial inner membrane); GO:0006744(biological_process:ubiquinone biosynthetic process); GO:0008299(biological_process:isoprenoid biosynthetic process); GO:0000010(molecular_function:trans-hexaprenyltranstransferase activity)	K05355	hexPS, COQ1	map00900(Terpenoid backbone biosynthesis)	COG0142(S:Function unknown)	COG0142(Conserved hypothetical, protein)	PF00348.14(polyprenyl_synt:Polyprenyl synthetase)	sp|Q7S565|COQ1_NEUCR(Probable hexaprenyl pyrophosphate synthase, mitochondrial OS=Neurospora crassa (strain ATCC 24698 / 74-OR23-1A / CBS 708.71 / DSM 1257 / FGSC 987) OX=367110 GN=NCU02305 PE=3 SV=1)
91694	hypothetical protein	435	0	20.65	125.576	6.97242	0.000373581	0.0060692	yes	up	XP_024771911.1(hypothetical protein M431DRAFT_91694 [Trichoderma harzianum CBS 226.95])					ENOG410YUKI(S:Function unknown)	ENOG410YUKI(-)
348235	hypothetical protein	813	0	5.865	123	6.94252	0.000373899	0.0060692	yes	up	XP_024777372.1(hypothetical protein M431DRAFT_348235 [Trichoderma harzianum CBS 226.95])
493250	hypothetical protein	444	31.94	330.36	7.56992	2.92028	0.000369823	0.00602562	yes	up	XP_024776453.1(hypothetical protein M431DRAFT_493250 [Trichoderma harzianum CBS 226.95])					ENOG410XZIJ(S:Function unknown); ENOG4110F3C(S:Function unknown)	ENOG410XZIJ(-); ENOG4110F3C(-)
512534	glycoside hydrolase family 16 protein	1392	2.61	38.755	9.30245	3.21761	0.000368592	0.00601686	yes	up	XP_024769416.1(glycoside hydrolase family 16 protein [Trichoderma harzianum CBS 226.95])	GO:0005975(biological_process:carbohydrate metabolic process); GO:0004553(molecular_function:hydrolase activity, hydrolyzing O-glycosyl compounds)				COG2273(S:Function unknown)	COG2273(-)	PF00722.18(Glyco_hydro_16:Glycosyl hydrolases family 16); PF03935.12(SKN1:Beta-glucan synthesis-associated protein (SKN1))
479068	hypothetical protein	450	3.305	55.065	11.4032	3.51137	0.000367744	0.00601434	yes	up	XP_024777135.1(hypothetical protein M431DRAFT_479068 [Trichoderma harzianum CBS 226.95])
501356	hypothetical protein	780	0.28	11.9	29.2848	4.87208	0.000364381	0.00597062	yes	up	XP_024767952.1(hypothetical protein M431DRAFT_501356 [Trichoderma harzianum CBS 226.95])
502368	hypothetical protein	723	0	7.175	124.177	6.95625	0.00035558	0.00584852	yes	up	XP_024779937.1(hypothetical protein M431DRAFT_502368 [Trichoderma harzianum CBS 226.95])					ENOG41123P4(S:Function unknown)	ENOG41123P4(Conserved hypothetical, protein)
18684	hypothetical protein	6090	4.065	35.245	5.79212	2.53409	0.000348574	0.00575512	yes	up	XP_024772026.1(hypothetical protein M431DRAFT_18684 [Trichoderma harzianum CBS 226.95])					ENOG4111K9J(S:Function unknown)	ENOG4111K9J(ANK)	PF12796.4(Ank_2:Ankyrin repeats (3 copies)); PF13637.3(Ank_4:Ankyrin repeats (many copies)); PF13857.3(Ank_5:Ankyrin repeats (many copies)); PF00023.27(Ank:Ankyrin repeat); PF13606.3(Ank_3:Ankyrin repeat)	sp|Q502M6|ANR29_DANRE(Ankyrin repeat domain-containing protein 29 OS=Danio rerio OX=7955 GN=ankrd29 PE=2 SV=1)
78844	hypothetical protein	1044	1.765	22.79	8.37674	3.06639	0.000346572	0.00573299	yes	up	XP_024777723.1(hypothetical protein M431DRAFT_78844 [Trichoderma harzianum CBS 226.95])	GO:0008299(biological_process:isoprenoid biosynthetic process); GO:0016740(molecular_function:transferase activity)	K00787	FDPS	map00900(Terpenoid backbone biosynthesis)	COG0142(H:Coenzyme transport and metabolism)	COG0142(synthase)	PF00348.14(polyprenyl_synt:Polyprenyl synthetase)	sp|Q92250|FPPS_NEUCR(Farnesyl pyrophosphate synthase OS=Neurospora crassa (strain ATCC 24698 / 74-OR23-1A / CBS 708.71 / DSM 1257 / FGSC 987) OX=367110 GN=fpp PE=3 SV=2)
92965	hypothetical protein	1971	11.68	107.985	5.96341	2.57614	0.000339647	0.00564001	yes	up	XP_024771238.1(hypothetical protein M431DRAFT_92965 [Trichoderma harzianum CBS 226.95])	GO:0005785(cellular_component:signal recognition particle receptor complex); GO:0005047(molecular_function:signal recognition particle binding); GO:0003924(molecular_function:GTPase activity); GO:0006614(biological_process:SRP-dependent cotranslational protein targeting to membrane); GO:0005634(cellular_component:nucleus); GO:0005829(cellular_component:cytosol); GO:0005525(molecular_function:GTP …	K13431	SRPR	map03060(Protein export)	COG0552(U:Intracellular trafficking, secretion, and vesicular transport)	COG0552(Involved in targeting and insertion of nascent membrane proteins into the cytoplasmic membrane. Acts as a receptor for the complex formed by the signal recognition particle (SRP) and the ribosome-nascent chain (RNC))	PF04086.10(SRP-alpha_N:Signal recognition particle, alpha subunit, N-terminal); PF00448.19(SRP54:SRP54-type protein, GTPase domain); PF02881.16(SRP54_N:SRP54-type protein, helical bundle domain); PF03308.13(ArgK:ArgK protein); PF01656.20(CbiA:CobQ/CobB/MinD/ParA nucleotide binding domain); PF13207.3(AAA_17:AAA domain); PF13604.3(AAA_30:AAA domain)	sp|P32916|SRPR_YEAST(Signal recognition particle receptor subunit alpha homolog OS=Saccharomyces cerevisiae (strain ATCC 204508 / S288c) OX=559292 GN=SRP101 PE=1 SV=2)
396012	hypothetical protein	1877	4.5	37.73	6.29729	2.65473	0.000333555	0.00557083	yes	up	PKK50432.1(hypothetical protein CI102_7601 [Trichoderma harzianum])	GO:0005634(cellular_component:nucleus); GO:0006357(biological_process:regulation of transcription from RNA polymerase II promoter); GO:0008270(molecular_function:zinc ion binding); GO:0000981(molecular_function:RNA polymerase II transcription factor activity, sequence-specific DNA binding); GO:0003677(molecular_function:DNA binding)				ENOG4111YCA(K:Transcription); ENOG4111TS2(S:Function unknown); ENOG410XR3W(K:Transcription)	ENOG4111YCA(Transcription factor); ENOG4111TS2(Transcription factor); ENOG410XR3W(Transcription factor)	PF04082.15(Fungal_trans:Fungal specific transcription factor domain)	sp|P40467|ASG1_YEAST(Activator of stress genes 1 OS=Saccharomyces cerevisiae (strain ATCC 204508 / S288c) OX=559292 GN=ASG1 PE=1 SV=1)
86014	hypothetical protein	783	16.68	149.735	6.08251	2.60467	0.000328883	0.00552472	yes	up	XP_024774447.1(hypothetical protein M431DRAFT_86014 [Trichoderma harzianum CBS 226.95])	GO:0046872(molecular_function:metal ion binding); GO:0051537(molecular_function:2 iron, 2 sulfur cluster binding); GO:0055114(biological_process:oxidation-reduction process); GO:0016491(molecular_function:oxidoreductase activity)	K03943	NDUFV2	map00190(Oxidative phosphorylation)	COG1905(C:Energy production and conversion)	COG1905(Nadh dehydrogenase)	PF01257.16(2Fe-2S_thioredx:Thioredoxin-like [2Fe-2S] ferredoxin)	sp|P40915|NDUV2_NEUCR(NADH-ubiquinone oxidoreductase 24 kDa subunit, mitochondrial OS=Neurospora crassa (strain ATCC 24698 / 74-OR23-1A / CBS 708.71 / DSM 1257 / FGSC 987) OX=367110 GN=nuo-24 PE=2 SV=1)
87634	hypothetical protein	474	24.095	224.09	6.45992	2.69152	0.000324547	0.00546248	yes	up	XP_024773494.1(hypothetical protein M431DRAFT_87634 [Trichoderma harzianum CBS 226.95])	GO:0016021(cellular_component:integral component of membrane)				ENOG410YI49(S:Function unknown); ENOG410ZSJW(S:Function unknown)	ENOG410YI49(F-box domain protein); ENOG410ZSJW(-)
501445	hypothetical protein	993	39.885	342.485	5.9685	2.57737	0.000292959	0.00500861	yes	up	OPB46625.1(lactate/malate dehydrogenase [Trichoderma guizhouense])	GO:0006099(biological_process:tricarboxylic acid cycle); GO:0030060(molecular_function:L-malate dehydrogenase activity); GO:0005975(biological_process:carbohydrate metabolic process); GO:0006108(biological_process:malate metabolic process)	K00026	MDH2	map00020(Citrate cycle (TCA cycle)); map00270(Cysteine and methionine metabolism); map00620(Pyruvate metabolism); map00630(Glyoxylate and dicarboxylate metabolism)	COG0039(J:Translation, ribosomal structure and biogenesis)	COG0039(protein complex subunit organization)	PF02866.15(Ldh_1_C:lactate/malate dehydrogenase, alpha/beta C-terminal domain); PF00056.20(Ldh_1_N:lactate/malate dehydrogenase, NAD binding domain)	sp|P83778|MDHC_CANAL(Malate dehydrogenase, cytoplasmic OS=Candida albicans (strain SC5314 / ATCC MYA-2876) OX=237561 GN=MDH1 PE=1 SV=2)
534504	hypothetical protein	2639	0.335	5.975	11.1766	3.48241	0.000289203	0.00495418	yes	up	XP_024769447.1(hypothetical protein M431DRAFT_534504 [Trichoderma harzianum CBS 226.95])
92409	hypothetical protein	690	7.955	84.535	6.99826	2.807	0.000280333	0.00483087	yes	up	XP_024771524.1(hypothetical protein M431DRAFT_92409 [Trichoderma harzianum CBS 226.95])	GO:0005737(cellular_component:cytoplasm); GO:0051603(biological_process:proteolysis involved in cellular protein catabolic process); GO:0005839(cellular_component:proteasome core complex); GO:0043161(biological_process:proteasome-mediated ubiquitin-dependent protein catabolic process); GO:0005634(cellular_component:nucleus); GO:0010499(biological_process:proteasomal ubiquitin-independent protein …	K02738	PSMB6	map03050(Proteasome)	ENOG410XS23(O:Posttranslational modification, protein turnover, chaperones)	ENOG410XS23(The proteasome is a multicatalytic proteinase complex which is characterized by its ability to cleave peptides with Arg, Phe, Tyr, Leu, and Glu adjacent to the leaving group at neutral or slightly basic pH. The proteasome has an ATP-dependent proteolytic activity (By similarity))	PF00227.23(Proteasome:Proteasome subunit)	sp|P38624|PSB1_YEAST(Proteasome subunit beta type-1 OS=Saccharomyces cerevisiae (strain ATCC 204508 / S288c) OX=559292 GN=PRE3 PE=1 SV=2)
90294	hypothetical protein	642	4.775	55.42	7.86816	2.97603	0.00027663	0.00478018	yes	up	XP_024772580.1(hypothetical protein M431DRAFT_90294 [Trichoderma harzianum CBS 226.95])	GO:0006888(biological_process:ER to Golgi vesicle-mediated transport); GO:0005783(cellular_component:endoplasmic reticulum); GO:0016021(cellular_component:integral component of membrane); GO:0006810(biological_process:transport); GO:0005789(cellular_component:endoplasmic reticulum membrane); GO:0030134(cellular_component:ER to Golgi transport vesicle)	K20352	TMED10, ERV25		ENOG410XTBQ(U:Intracellular trafficking, secretion, and vesicular transport)	ENOG410XTBQ(vesicle-mediated transport)	PF01105.21(EMP24_GP25L:emp24/gp25L/p24 family/GOLD)	sp|Q4HY20|TMEDA_GIBZE(Endoplasmic reticulum vesicle protein 25 OS=Gibberella zeae (strain PH-1 / ATCC MYA-4620 / FGSC 9075 / NRRL 31084) OX=229533 GN=ERV25 PE=3 SV=1)
99990	glycosyltransferase family 20 protein	2625	2.215	24.185	6.56823	2.7155	0.00027356	0.00475194	yes	up	XP_024768050.1(glycosyltransferase family 20 protein [Trichoderma harzianum CBS 226.95])	GO:0005946(cellular_component:alpha,alpha-trehalose-phosphate synthase complex (UDP-forming)); GO:0004805(molecular_function:trehalose-phosphatase activity); GO:0016311(biological_process:dephosphorylation); GO:0034605(biological_process:cellular response to heat); GO:0005992(biological_process:trehalose biosynthetic process); GO:0003824(molecular_function:catalytic activity); GO:0016740(molecula…	K16055	TPS	map00500(Starch and sucrose metabolism)	COG0380(G:Carbohydrate transport and metabolism)	COG0380(synthase)	PF00982.18(Glyco_transf_20:Glycosyltransferase family 20); PF02358.13(Trehalose_PPase:Trehalose-phosphatase)	sp|P31688|TPS2_YEAST(Trehalose-phosphatase OS=Saccharomyces cerevisiae (strain ATCC 204508 / S288c) OX=559292 GN=TPS2 PE=1 SV=3)
505399	hypothetical protein	3672	1.135	12.505	7.04048	2.81567	0.000262964	0.00461412	yes	up	XP_024777516.1(hypothetical protein M431DRAFT_505399 [Trichoderma harzianum CBS 226.95])	GO:0015031(biological_process:protein transport); GO:0006904(biological_process:vesicle docking involved in exocytosis); GO:0000145(cellular_component:exocyst)	K06111	EXOC4, SEC8		ENOG410Z8N0(U:Intracellular trafficking, secretion, and vesicular transport)	ENOG410Z8N0(Exocyst complex component)	PF04048.11(Sec8_exocyst:Sec8 exocyst complex component specific domain); PF10475.6(Vps54_N:Vacuolar-sorting protein 54, of GARP complex)	sp|Q9HE88|SEC8_NEUCR(Probable exocyst complex component sec8 OS=Neurospora crassa (strain ATCC 24698 / 74-OR23-1A / CBS 708.71 / DSM 1257 / FGSC 987) OX=367110 GN=sec8 PE=3 SV=1)
19992	hypothetical protein	1489	4.09	47.42	7.66539	2.93836	0.000260078	0.00457273	yes	up	XP_024770304.1(hypothetical protein M431DRAFT_19992 [Trichoderma harzianum CBS 226.95])					ENOG410YWSU(S:Function unknown); ENOG410YZBX(S:Function unknown); ENOG4110WUP(S:Function unknown)	ENOG410YWSU(-); ENOG410YZBX(-); ENOG4110WUP(-)
173840	hypothetical protein	1162	6.215	61.435	6.55526	2.71265	0.000255937	0.00451825	yes	up	XP_024779885.1(hypothetical protein M431DRAFT_173840 [Trichoderma harzianum CBS 226.95])		K13137	STRAP, UNRIP	map03013(RNA transport)	ENOG410XPJ4(S:Function unknown)	ENOG410XPJ4(serine threonine kinase receptor associated protein)	PF00400.29(WD40:WD domain, G-beta repeat); PF16529.2(Ge1_WD40:WD40 region of Ge1, enhancer of mRNA-decapping protein)	sp|Q5ZL33|STRAP_CHICK(Serine-threonine kinase receptor-associated protein OS=Gallus gallus OX=9031 GN=STRAP PE=2 SV=2)
18632	hypothetical protein	1618	0.07	4.17	40.2794	5.33197	0.000252376	0.00447361	yes	up	XP_024771949.1(hypothetical protein M431DRAFT_18632 [Trichoderma harzianum CBS 226.95])
507812	hypothetical protein	1317	21.445	204.09	6.3266	2.66143	0.000247223	0.00440932	yes	up	PKK47086.1(hypothetical protein CI102_11752 [Trichoderma harzianum])	GO:0009272(biological_process:fungal-type cell wall biogenesis); GO:0016779(molecular_function:nucleotidyltransferase activity); GO:0006486(biological_process:protein glycosylation); GO:0051286(cellular_component:cell tip); GO:0005829(cellular_component:cytosol); GO:0004475(molecular_function:mannose-1-phosphate guanylyltransferase activity); GO:0009298(biological_process:GDP-mannose biosynthetic…	K00966	GMPP	map00051(Fructose and mannose metabolism); map00520(Amino sugar and nucleotide sugar metabolism)	COG1208(S:Function unknown)	COG1208(-)	PF00483.20(NTP_transferase:Nucleotidyl transferase); PF00132.21(Hexapep:Bacterial transferase hexapeptide (six repeats)); PF14602.3(Hexapep_2:Hexapeptide repeat of succinyl-transferase)	sp|O74624|MPG1_HYPJE(Mannose-1-phosphate guanyltransferase OS=Hypocrea jecorina OX=51453 GN=mpg1 PE=1 SV=1)
296226	hypothetical protein	1021	13.87	134.39	6.4856	2.69724	0.000245329	0.00439737	yes	up	XP_024778866.1(hypothetical protein M431DRAFT_296226 [Trichoderma harzianum CBS 226.95])	GO:0000413(biological_process:protein peptidyl-prolyl isomerization); GO:0003755(molecular_function:peptidyl-prolyl cis-trans isomerase activity)	K09578	PIN1		COG0760(O:Posttranslational modification, protein turnover, chaperones)	COG0760(peptidyl-prolyl cis-trans isomerase)	PF00639.18(Rotamase:PPIC-type PPIASE domain); PF13616.3(Rotamase_3:PPIC-type PPIASE domain); PF00397.23(WW:WW domain)	sp|O60045|SSP1_NEUCR(Peptidyl-prolyl cis-trans isomerase ssp-1 OS=Neurospora crassa (strain ATCC 24698 / 74-OR23-1A / CBS 708.71 / DSM 1257 / FGSC 987) OX=367110 GN=ssp-1 PE=1 SV=3)
85009	hypothetical protein	1143	6.74	78.37	6.99812	2.80697	0.000225267	0.00408497	yes	up	XP_024405292.1(actin-like protein [Trichoderma gamsii])	GO:0005869(cellular_component:dynactin complex)	K16575	ACTR1, ARP1		COG5277(S:Function unknown)	COG5277(Conserved hypothetical, protein)	PF00022.16(Actin:Actin)	sp|P38673|ACTZ_NEUCR(Actin-like protein OS=Neurospora crassa (strain ATCC 24698 / 74-OR23-1A / CBS 708.71 / DSM 1257 / FGSC 987) OX=367110 GN=ro-4 PE=3 SV=1)
514053	hypothetical protein	1321	4.785	52.75	7.31426	2.87071	0.000221219	0.00403658	yes	up	XP_024767669.1(hypothetical protein M431DRAFT_514053 [Trichoderma harzianum CBS 226.95])	GO:0003735(molecular_function:structural constituent of ribosome); GO:0005737(cellular_component:cytoplasm); GO:0005840(cellular_component:ribosome)	K02902	RP-L28, MRPL28, rpmB	map03010(Ribosome)	COG0227(J:Translation, ribosomal structure and biogenesis)	COG0227(50s ribosomal protein L28)	PF00830.16(Ribosomal_L28:Ribosomal L28 family)	sp|P36525|RM24_YEAST(54S ribosomal protein L24, mitochondrial OS=Saccharomyces cerevisiae (strain ATCC 204508 / S288c) OX=559292 GN=MRPL24 PE=1 SV=2)
74229	hypothetical protein	1131	24.39	243.88	6.6234	2.72757	0.000222133	0.00403658	yes	up	XP_024779281.1(hypothetical protein M431DRAFT_74229 [Trichoderma harzianum CBS 226.95])					ENOG41123WB(S:Function unknown)	ENOG41123WB(Uncharacterised protein (DUF2406))	PF10295.6(DUF2406:Uncharacterised protein (DUF2406))	sp|Q03559|YM8V_YEAST(Uncharacterized protein YMR295C OS=Saccharomyces cerevisiae (strain ATCC 204508 / S288c) OX=559292 GN=YMR295C PE=1 SV=1)
9593	hypothetical protein	2388	0.42	7.44	11.2245	3.48858	0.000218316	0.00400076	yes	up	XP_024769403.1(hypothetical protein M431DRAFT_9593 [Trichoderma harzianum CBS 226.95])	GO:0016021(cellular_component:integral component of membrane); GO:0055085(biological_process:transmembrane transport)				ENOG410XNZC(U:Intracellular trafficking, secretion, and vesicular transport)	ENOG410XNZC(Tumor susceptibility gene 101)	PF03169.12(OPT:OPT oligopeptide transporter protein)	sp|O23482|OPT3_ARATH(Oligopeptide transporter 3 OS=Arabidopsis thaliana OX=3702 GN=OPT3 PE=2 SV=3)
507255	hypothetical protein	1022	0.185	9.045	32.2663	5.01195	0.000202209	0.00375264	yes	up	PKK46658.1(hypothetical protein CI102_8981 [Trichoderma harzianum])		K18179	COA6		ENOG41126R5(S:Function unknown)	ENOG41126R5(Conserved hypothetical, protein)	PF02297.14(COX6B:Cytochrome oxidase c subunit VIb)
153051	hypothetical protein	956	2.2	28.825	8.77726	3.13377	0.000198677	0.00369555	yes	up	XP_024769618.1(hypothetical protein M431DRAFT_153051 [Trichoderma harzianum CBS 226.95])					ENOG4111Q7S(S:Function unknown)	ENOG4111Q7S(-)
78153	hypothetical protein	990	41.575	390.48	6.38063	2.6737	0.000198276	0.00369555	yes	up	XP_024777268.1(hypothetical protein M431DRAFT_78153 [Trichoderma harzianum CBS 226.95])	GO:0016765(molecular_function:transferase activity, transferring alkyl or aryl (other than methyl) groups); GO:0016021(cellular_component:integral component of membrane)	K19177	NUS1	map00900(Terpenoid backbone biosynthesis)	COG0020(I:Lipid transport and metabolism)	COG0020(Catalyzes the condensation of isopentenyl diphosphate (IPP) with allylic pyrophosphates generating different type of terpenoids (By similarity))	PF01255.16(Prenyltransf:Putative undecaprenyl diphosphate synthase)	sp|Q9Y7K8|UPPS_SCHPO(Dehydrodolichyl diphosphate synthase complex subunit nus1 OS=Schizosaccharomyces pombe (strain 972 / ATCC 24843) OX=284812 GN=nus1 PE=1 SV=1)
485492	hypothetical protein	903	0	5.92	140.736	7.13685	0.000196713	0.00369037	yes	up	XP_024770460.1(hypothetical protein M431DRAFT_485492 [Trichoderma harzianum CBS 226.95])					COG0457(S:Function unknown); ENOG410YWG7(S:Function unknown); ENOG410YM9X(S:Function unknown)	COG0457(Ankyrin Repeat); ENOG410YWG7(-); ENOG410YM9X(-)	PF14479.3(HeLo:Prion-inhibition and propagation)	sp|B2ACC7|HETS_PODAN(Heterokaryon incompatibility protein S OS=Podospora anserina (strain S / ATCC MYA-4624 / DSM 980 / FGSC 10383) OX=515849 GN=het-S PE=1 SV=1)
482508	hypothetical protein	1647	6.35	72.85	7.19369	2.84673	0.000197546	0.00369037	yes	up	XP_024773309.1(hypothetical protein M431DRAFT_482508 [Trichoderma harzianum CBS 226.95])	GO:0005737(cellular_component:cytoplasm); GO:0006457(biological_process:protein folding); GO:0005634(cellular_component:nucleus); GO:0051082(molecular_function:unfolded protein binding); GO:0005832(cellular_component:chaperonin-containing T-complex); GO:0005524(molecular_function:ATP binding)	K09494	CCT2		COG0459(J:Translation, ribosomal structure and biogenesis)	COG0459(Component of the eukaryotic translation initiation factor 3 (eIF-3) complex, which is involved in protein synthesis and, together with other initiation factors, stimulates binding of mRNA and methionyl-tRNAi to the 40S ribosome (By similarity))	PF00118.21(Cpn60_TCP1:TCP-1/cpn60 chaperonin family)	sp|Q10147|TCPB_SCHPO(Probable T-complex protein 1 subunit beta OS=Schizosaccharomyces pombe (strain 972 / ATCC 24843) OX=284812 GN=cct2 PE=3 SV=1)
83571	glycosyltransferase family 20 protein	1593	10.185	98.085	6.31598	2.65901	0.000197406	0.00369037	yes	up	XP_024775317.1(glycosyltransferase family 20 protein [Trichoderma harzianum CBS 226.95])	GO:0005946(cellular_component:alpha,alpha-trehalose-phosphate synthase complex (UDP-forming)); GO:0005829(cellular_component:cytosol); GO:0005992(biological_process:trehalose biosynthetic process); GO:0003825(molecular_function:alpha,alpha-trehalose-phosphate synthase (UDP-forming) activity); GO:0030437(biological_process:ascospore formation); GO:0090441(biological_process:trehalose biosynthesis …	K00697	otsA	map00500(Starch and sucrose metabolism)	COG0380(J:Translation, ribosomal structure and biogenesis)	COG0380(Exonuclease involved in the 3' processing of various precursor tRNAs. Initiates hydrolysis at the 3'-terminus of an RNA molecule and releases 5'-mononucleotides (By similarity))	PF00982.18(Glyco_transf_20:Glycosyltransferase family 20); PF13692.3(Glyco_trans_1_4:Glycosyl transferases group 1)	sp|O59921|TPS1_EMENI(Alpha,alpha-trehalose-phosphate synthase [UDP-forming] OS=Emericella nidulans (strain FGSC A4 / ATCC 38163 / CBS 112.46 / NRRL 194 / M139) OX=227321 GN=tpsA PE=3 SV=1)
488956	hypothetical protein	2322	9.675	90.82	6.32142	2.66025	0.000193581	0.00363983	yes	up	XP_024779886.1(hypothetical protein M431DRAFT_488956 [Trichoderma harzianum CBS 226.95])		K14018	PLAA, DOA1, UFD3	map04141(Protein processing in endoplasmic reticulum)	ENOG410XS67(S:Function unknown)	ENOG410XS67(Phospholipase A2-activating protein)	PF08324.8(PUL:PUL domain); PF09070.8(PFU:PFU (PLAA family ubiquitin binding)); PF00400.29(WD40:WD domain, G-beta repeat)	sp|O94289|LUB1_SCHPO(Ubiquitin homeostasis protein lub1 OS=Schizosaccharomyces pombe (strain 972 / ATCC 24843) OX=284812 GN=lub1 PE=1 SV=2)
505973	hypothetical protein	848	20.015	135.015	7.46076	2.89932	0.000191391	0.00360648	yes	up	XP_013959210.1(hypothetical protein TRIVIDRAFT_91694 [Trichoderma virens Gv29-8])	GO:0031386(molecular_function:protein tag); GO:0045116(biological_process:protein neddylation)	K12158	NEDD8		COG5272(S:Function unknown)	COG5272(Methyltransferase domain)	PF00240.20(ubiquitin:Ubiquitin family); PF11976.5(Rad60-SLD:Ubiquitin-2 like Rad60 SUMO-like); PF14560.3(Ubiquitin_2:Ubiquitin-like domain)	sp|Q93725|NEDD8_CAEEL(NEDD8 OS=Caenorhabditis elegans OX=6239 GN=ned-8 PE=1 SV=1)
505440	hypothetical protein	427	4914.84	41024.1	6.05802	2.59885	0.0001778	0.00338719	yes	up	XP_024777557.1(hypothetical protein M431DRAFT_505440 [Trichoderma harzianum CBS 226.95])					ENOG41127FK(S:Function unknown)	ENOG41127FK(cipC-like antibiotic response protein)	PF12585.5(DUF3759:Protein of unknown function (DUF3759))
514873	hypothetical protein	1454	5.45	58.4	7.043	2.81619	0.000172206	0.00330971	yes	up	XP_024780088.1(hypothetical protein M431DRAFT_514873 [Trichoderma harzianum CBS 226.95])	GO:0016884(molecular_function:carbon-nitrogen ligase activity, with glutamine as amido-N-donor)	K09117	K09117		ENOG410Y16D(S:Function unknown); COG0251(J:Translation, ribosomal structure and biogenesis)	ENOG410Y16D(Conserved hypothetical, protein); COG0251(Endoribonuclease LPSP)	PF01042.18(Ribonuc_L-PSP:Endoribonuclease L-PSP); PF09424.7(YqeY:Yqey-like protein)	sp|B2WMX8|AIM41_PYRTR(Altered inheritance of mitochondria protein 41, mitochondrial OS=Pyrenophora tritici-repentis (strain Pt-1C-BFP) OX=426418 GN=AIM41 PE=3 SV=1)
493263	hypothetical protein	939	26.9	292.32	7.40019	2.88756	0.000166243	0.00323092	yes	up	XP_024776464.1(hypothetical protein M431DRAFT_493263 [Trichoderma harzianum CBS 226.95])	GO:0016021(cellular_component:integral component of membrane); GO:0016780(molecular_function:phosphotransferase activity, for other substituted phosphate groups); GO:0008654(biological_process:phospholipid biosynthetic process)	K00999	CDIPT	map00562(Inositol phosphate metabolism); map00564(Glycerophospholipid metabolism); map04070(Phosphatidylinositol signaling system)	COG0558(I:Lipid transport and metabolism)	COG0558(cdp-diacylglycerol-glycerol-3-phosphate 3-phosphatidyltransferase)	PF01066.18(CDP-OH_P_transf:CDP-alcohol phosphatidyltransferase)	sp|Q10153|PIS_SCHPO(CDP-diacylglycerol--inositol 3-phosphatidyltransferase OS=Schizosaccharomyces pombe (strain 972 / ATCC 24843) OX=284812 GN=pis1 PE=3 SV=2)
98018	hypothetical protein	420	41.915	377.645	6.25656	2.64537	0.000159968	0.00313002	yes	up	XP_006965819.1(hypothetical protein TRIREDRAFT_122071 [Trichoderma reesei QM6a])	GO:0016021(cellular_component:integral component of membrane); GO:0006810(biological_process:transport)	K20368	CNIH, ERV14		ENOG4111MWH(U:Intracellular trafficking, secretion, and vesicular transport)	ENOG4111MWH(cornichon homolog)	PF03311.11(Cornichon:Cornichon protein)	sp|P53173|ERV14_YEAST(ER-derived vesicles protein ERV14 OS=Saccharomyces cerevisiae (strain ATCC 204508 / S288c) OX=559292 GN=ERV14 PE=1 SV=3)
507563	hypothetical protein	3660	0.695	8.415	7.83858	2.97059	0.000157224	0.00308329	yes	up	XP_024775572.1(hypothetical protein M431DRAFT_507563 [Trichoderma harzianum CBS 226.95])	GO:0016903(molecular_function:oxidoreductase activity, acting on the aldehyde or oxo group of donors); GO:0055114(biological_process:oxidation-reduction process)	K00380	cysJ	map00920(Sulfur metabolism)	COG0674(C:Energy production and conversion)	COG0674(Oxidoreductase required for the transfer of electrons from pyruvate to flavodoxin (By similarity))	PF00667.17(FAD_binding_1:FAD binding domain); PF00175.18(NAD_binding_1:Oxidoreductase NAD-binding domain); PF17147.1(PFOR_II:Pyruvate:ferredoxin oxidoreductase core domain II); PF01558.15(POR:Pyruvate ferredoxin/flavodoxin oxidoreductase); PF02780.17(Transketolase_C:Transketolase, C-terminal domain)	sp|P39692|MET10_YEAST(Sulfite reductase [NADPH] flavoprotein component OS=Saccharomyces cerevisiae (strain ATCC 204508 / S288c) OX=559292 GN=MET10 PE=1 SV=2)
80963	hypothetical protein	1083	0.06	8.805	98.9446	6.62855	0.00015351	0.00302619	yes	up	XP_024776830.1(hypothetical protein M431DRAFT_80963 [Trichoderma harzianum CBS 226.95])	GO:0003824(molecular_function:catalytic activity); GO:0010181(molecular_function:FMN binding); GO:0055114(biological_process:oxidation-reduction process); GO:0016491(molecular_function:oxidoreductase activity)	K00354	E1.6.99.1		COG1902(G:Carbohydrate transport and metabolism)	COG1902(Oxalate decarboxylase)	PF00724.17(Oxidored_FMN:NADH:flavin oxidoreductase / NADH oxidase family)	sp|A2TBU0|EASA_EPIFI(Probable inactive reductase easA OS=Epichloe festucae var. lolii OX=73839 GN=easA PE=2 SV=1)
484440	hypothetical protein	1527	1.115	15.37	9.03497	3.17552	0.000144479	0.00289894	yes	up	XP_024772080.1(hypothetical protein M431DRAFT_484440 [Trichoderma harzianum CBS 226.95])	GO:0030956(cellular_component:glutamyl-tRNA(Gln) amidotransferase complex); GO:0050567(molecular_function:glutaminyl-tRNA synthase (glutamine-hydrolyzing) activity); GO:0005739(cellular_component:mitochondrion); GO:0016740(molecular_function:transferase activity); GO:0070681(biological_process:glutaminyl-tRNAGln biosynthesis via transamidation); GO:0032543(biological_process:mitochondrial transla…	K02433	gatA, QRSL1	map00970(Aminoacyl-tRNA biosynthesis)	COG0154(S:Function unknown)	COG0154(-)	PF01425.18(Amidase:Amidase)	sp|C7YSE7|GATA_NECH7(Glutamyl-tRNA(Gln) amidotransferase subunit A, mitochondrial OS=Nectria haematococca (strain 77-13-4 / ATCC MYA-4622 / FGSC 9596 / MPVI) OX=660122 GN=NECHADRAFT_104567 PE=3 SV=1)
95911	hypothetical protein	2085	6.22	82.315	8.3061	3.05417	0.000142385	0.00286357	yes	up	XP_024769683.1(hypothetical protein M431DRAFT_95911 [Trichoderma harzianum CBS 226.95])					ENOG4111FVM(S:Function unknown)	ENOG4111FVM(-)
84127	hypothetical protein	1671	15.85	176.035	7.04004	2.81558	0.000139368	0.00282914	yes	up	XP_024775155.1(hypothetical protein M431DRAFT_84127 [Trichoderma harzianum CBS 226.95])	GO:0005737(cellular_component:cytoplasm); GO:0006457(biological_process:protein folding); GO:0005634(cellular_component:nucleus); GO:0051082(molecular_function:unfolded protein binding); GO:0005832(cellular_component:chaperonin-containing T-complex); GO:0005524(molecular_function:ATP binding)	K09499	CCT7		COG0459(G:Carbohydrate transport and metabolism)	COG0459(Phosphoketolase)	PF00118.21(Cpn60_TCP1:TCP-1/cpn60 chaperonin family)	sp|P87153|TCPH_SCHPO(Probable T-complex protein 1 subunit eta OS=Schizosaccharomyces pombe (strain 972 / ATCC 24843) OX=284812 GN=cct7 PE=1 SV=1)
99999	hypothetical protein	1263	5.49	50.975	7.23036	2.85407	0.000133022	0.0027388	yes	up	XP_024768088.1(hypothetical protein M431DRAFT_99999 [Trichoderma harzianum CBS 226.95])	GO:0016021(cellular_component:integral component of membrane); GO:0016020(cellular_component:membrane)				ENOG410YF1A(S:Function unknown); ENOG4110MTT(S:Function unknown); ENOG41107DY(S:Function unknown); ENOG41118IE(S:Function unknown)	ENOG410YF1A(-); ENOG4110MTT(-); ENOG41107DY(-); ENOG41118IE(-)
72125	hypothetical protein	1053	1.015	20.115	13.1209	3.71379	0.000125464	0.00262054	yes	up	XP_024780631.1(hypothetical protein M431DRAFT_72125 [Trichoderma harzianum CBS 226.95])	GO:0009966(biological_process:regulation of signal transduction); GO:0005829(cellular_component:cytosol); GO:0031929(biological_process:TOR signaling); GO:0019898(cellular_component:extrinsic component of membrane); GO:0045943(biological_process:positive regulation of transcription from RNA polymerase I promoter); GO:0005634(cellular_component:nucleus)	K17606	IGBP1, TAP42	map04138(Autophagy - yeast)	ENOG41110HD(S:Function unknown)	ENOG41110HD(Immunoglobulin (CD79A) binding protein 1)	PF04177.9(TAP42:TAP42-like family)	sp|Q9Y7T1|YCJ5_SCHPO(Uncharacterized protein C63.05 OS=Schizosaccharomyces pombe (strain 972 / ATCC 24843) OX=284812 GN=SPCC63.05 PE=3 SV=1)
449640	hypothetical protein	1153	3.135	37.585	7.8993	2.98172	0.000122523	0.00257149	yes	up	XP_024773754.1(hypothetical protein M431DRAFT_449640 [Trichoderma harzianum CBS 226.95])
499229	hypothetical protein	1473	3.935	47.265	8.06011	3.0108	0.000117768	0.00247771	yes	up	XP_024770084.1(hypothetical protein M431DRAFT_499229 [Trichoderma harzianum CBS 226.95])	GO:0050660(molecular_function:flavin adenine dinucleotide binding); GO:0016614(molecular_function:oxidoreductase activity, acting on CH-OH group of donors); GO:0055114(biological_process:oxidation-reduction process)				COG0277(S:Function unknown)	COG0277(-)	PF01565.20(FAD_binding_4:FAD binding domain)	sp|O17397|DIML_CAEEL(Diminuto-like protein OS=Caenorhabditis elegans OX=6239 GN=F52H2.6 PE=3 SV=1)
87223	hypothetical protein	609	3.335	109.02	20.5165	4.35871	0.000106577	0.00230953	yes	up	XP_024773412.1(hypothetical protein M431DRAFT_87223 [Trichoderma harzianum CBS 226.95])	GO:0005737(cellular_component:cytoplasm); GO:0050790(biological_process:regulation of catalytic activity); GO:0005094(molecular_function:Rho GDP-dissociation inhibitor activity)	K12462	ARHGDI, RHOGDI		ENOG4111K44(O:Posttranslational modification, protein turnover, chaperones)	ENOG4111K44(Rho GDP dissociation inhibitor (GDI))	PF02115.14(Rho_GDI:RHO protein GDP dissociation inhibitor)	sp|O14224|GDIR_SCHPO(Rho GDP-dissociation inhibitor OS=Schizosaccharomyces pombe (strain 972 / ATCC 24843) OX=284812 GN=SPAC6F12.06 PE=1 SV=1)
100272	hypothetical protein	813	0.26	13.88	35.1181	5.13414	0.000102671	0.00224169	yes	up	XP_024768040.1(hypothetical protein M431DRAFT_100272 [Trichoderma harzianum CBS 226.95])	GO:0003824(molecular_function:catalytic activity)				COG3836(G:Carbohydrate transport and metabolism)	COG3836(Aldolase)	PF03328.11(HpcH_HpaI:HpcH/HpaI aldolase/citrate lyase family)	sp|A9MH59|HPCH_SALAR(4-hydroxy-2-oxo-heptane-1,7-dioate aldolase OS=Salmonella arizonae (strain ATCC BAA-731 / CDC346-86 / RSK2980) OX=41514 GN=hpcH PE=3 SV=1)
507689	hypothetical protein	1060	0.06	9.79	110.029	6.78174	9.47e-05	0.00208281	yes	up	XP_024775699.1(hypothetical protein M431DRAFT_507689 [Trichoderma harzianum CBS 226.95])	GO:0016021(cellular_component:integral component of membrane)				ENOG4110W5G(S:Function unknown); ENOG410Y5IZ(S:Function unknown); ENOG410Y833(S:Function unknown)	ENOG4110W5G(Endoplasmic reticulum-based factor for assembly of V-ATPase); ENOG410Y5IZ(Endoplasmic reticulum-based factor for assembly of V-ATPase); ENOG410Y833(Conserved hypothetical, protein)	PF11712.5(Vma12:Endoplasmic reticulum-based factor for assembly of V-ATPase)
15133	hypothetical protein	1593	0.175	6.75	27.4584	4.77917	9.44e-05	0.0020825	yes	up	XP_024776139.1(hypothetical protein M431DRAFT_15133 [Trichoderma harzianum CBS 226.95])					ENOG41119J4(S:Function unknown)	ENOG41119J4(-)
486218	glycoside hydrolase family 16 protein	1446	10.79	130.42	7.69702	2.9443	8.87e-05	0.00197055	yes	up	XP_024769937.1(glycoside hydrolase family 16 protein [Trichoderma harzianum CBS 226.95])	GO:0016021(cellular_component:integral component of membrane); GO:0005975(biological_process:carbohydrate metabolic process); GO:0004553(molecular_function:hydrolase activity, hydrolyzing O-glycosyl compounds)				COG2273(Q:Secondary metabolites biosynthesis, transport and catabolism)	COG2273(Cytochrome p450)	PF00722.18(Glyco_hydro_16:Glycosyl hydrolases family 16)	sp|Q8N0N3|BGBP_PENMO(Beta-1,3-glucan-binding protein OS=Penaeus monodon OX=6687 PE=2 SV=1)
513976	hypothetical protein	1800	2.605	62.77	16.081	4.00729	7.93e-05	0.00180358	yes	up	XP_024767739.1(hypothetical protein M431DRAFT_513976 [Trichoderma harzianum CBS 226.95])	GO:0050660(molecular_function:flavin adenine dinucleotide binding); GO:0016614(molecular_function:oxidoreductase activity, acting on CH-OH group of donors); GO:0055114(biological_process:oxidation-reduction process)				COG0277(I:Lipid transport and metabolism); COG1085(C:Energy production and conversion)	COG0277(alpha beta hydrolase fold-3 domain protein); COG1085(FAD linked oxidase domain protein)	PF01565.20(FAD_binding_4:FAD binding domain)	sp|Q15392|DHC24_HUMAN(Delta(24)-sterol reductase OS=Homo sapiens OX=9606 GN=DHCR24 PE=1 SV=2)
494994	carbohydrate-binding module family 66 protein	1503	2.175	31.995	9.81671	3.29524	7.71e-05	0.00176429	yes	up	XP_024774445.1(carbohydrate-binding module family 66 protein [Trichoderma harzianum CBS 226.95])	GO:0045493(biological_process:xylan catabolic process); GO:0005975(biological_process:carbohydrate metabolic process); GO:0004553(molecular_function:hydrolase activity, hydrolyzing O-glycosyl compounds)				ENOG410XQ21(G:Carbohydrate transport and metabolism); ENOG410ZVEF(G:Carbohydrate transport and metabolism); ENOG410XPHB(G:Carbohydrate transport and metabolism)	ENOG410XQ21(hydrolase family 43); ENOG410ZVEF(Glycosyl hydrolases family 43); ENOG410XPHB(Glycosyl hydrolases family 43)	PF04616.11(Glyco_hydro_43:Glycosyl hydrolases family 43); PF06439.8(DUF1080:Domain of Unknown Function (DUF1080))	sp|Q45071|XYND_BACSU(Arabinoxylan arabinofuranohydrolase OS=Bacillus subtilis (strain 168) OX=224308 GN=xynD PE=1 SV=2)
352623	hypothetical protein	1202	8.375	97.485	7.60721	2.92737	7.46e-05	0.00171981	yes	up	XP_024777581.1(hypothetical protein M431DRAFT_352623 [Trichoderma harzianum CBS 226.95])	GO:0005737(cellular_component:cytoplasm); GO:0019773(cellular_component:proteasome core complex, alpha-subunit complex); GO:0005634(cellular_component:nucleus); GO:0010499(biological_process:proteasomal ubiquitin-independent protein catabolic process); GO:0004298(molecular_function:threonine-type endopeptidase activity); GO:0006511(biological_process:ubiquitin-dependent protein catabolic process)…	K02725	PSMA1	map03050(Proteasome)	COG0638(E:Amino acid transport and metabolism)	COG0638(Catalyzes the reversible conversion of 3- phosphohydroxypyruvate to phosphoserine and of 3-hydroxy-2-oxo-4- phosphonooxybutanoate to phosphohydroxythreonine (By similarity))	PF00227.23(Proteasome:Proteasome subunit); PF10584.6(Proteasome_A_N:Proteasome subunit A N-terminal signature)	sp|O14250|PSA6_SCHPO(Probable proteasome subunit alpha type-6 OS=Schizosaccharomyces pombe (strain 972 / ATCC 24843) OX=284812 GN=SPAC6G10.04c PE=3 SV=1)
94490	hypothetical protein	1224	10.22	110.655	7.10578	2.82899	7.23e-05	0.00167976	yes	up	XP_024770450.1(hypothetical protein M431DRAFT_94490 [Trichoderma harzianum CBS 226.95])		K20465	OSBPL9_10_11, ORP9_10_11		ENOG410XRW6(I:Lipid transport and metabolism)	ENOG410XRW6(diacylglycerol kinase)	PF01237.15(Oxysterol_BP:Oxysterol-binding protein)	sp|P35844|KES1_YEAST(Oxysterol-binding protein homolog 4 OS=Saccharomyces cerevisiae (strain ATCC 204508 / S288c) OX=559292 GN=KES1 PE=1 SV=1)
74753	hypothetical protein	1284	3.76	47.895	8.2062	3.03671	6.64e-05	0.00155445	yes	up	XP_024779224.1(hypothetical protein M431DRAFT_74753 [Trichoderma harzianum CBS 226.95])	GO:0008152(biological_process:metabolic process)				COG0508(C:Energy production and conversion)	COG0508(Dehydrogenase)	PF00364.19(Biotin_lipoyl:Biotin-requiring enzyme); PF02817.14(E3_binding:e3 binding domain); PF13533.3(Biotin_lipoyl_2:Biotin-lipoyl like)	sp|O94709|ODPX_SCHPO(Probable pyruvate dehydrogenase protein X component, mitochondrial OS=Schizosaccharomyces pombe (strain 972 / ATCC 24843) OX=284812 GN=SPCC1259.09c PE=2 SV=1)
291724	hypothetical protein	2045	9.405	136.315	9.25335	3.20998	6.21e-05	0.00147094	yes	up	XP_024778647.1(hypothetical protein M431DRAFT_291724 [Trichoderma harzianum CBS 226.95])	GO:0055114(biological_process:oxidation-reduction process); GO:0016491(molecular_function:oxidoreductase activity)				COG1232(H:Coenzyme transport and metabolism)	COG1232(protoporphyrinogen oxidase)	PF01593.21(Amino_oxidase:Flavin containing amine oxidoreductase); PF13450.3(NAD_binding_8:NAD(P)-binding Rossmann-like domain)
521499	hypothetical protein	1570	0.9	16.665	11.687	3.54683	6.08e-05	0.00145278	yes	up	XP_024773015.1(hypothetical protein M431DRAFT_521499 [Trichoderma harzianum CBS 226.95])	GO:0005829(cellular_component:cytosol); GO:0019287(biological_process:isopentenyl diphosphate biosynthetic process, mevalonate pathway); GO:0004163(molecular_function:diphosphomevalonate decarboxylase activity); GO:0005524(molecular_function:ATP binding)	K01597	MVD, mvaD	map00900(Terpenoid backbone biosynthesis)	COG3407(I:Lipid transport and metabolism)	COG3407(Diphosphomevalonate decarboxylase)	PF00288.23(GHMP_kinases_N:GHMP kinases N terminal domain)	sp|O13963|MVD1_SCHPO(Diphosphomevalonate decarboxylase OS=Schizosaccharomyces pombe (strain 972 / ATCC 24843) OX=284812 GN=mvd1 PE=3 SV=1)
97760	hypothetical protein	588	12.96	211.93	10.9832	3.45722	6.03e-05	0.00144789	yes	up	XP_024768997.1(hypothetical protein M431DRAFT_97760 [Trichoderma harzianum CBS 226.95])	GO:0016972(molecular_function:thiol oxidase activity); GO:0055114(biological_process:oxidation-reduction process)	K17783	ERV1, GFER, ALR		COG5054(H:Coenzyme transport and metabolism)	COG5054(synthase)	PF04777.10(Evr1_Alr:Erv1 / Alr family)	sp|Q63042|ALR_RAT(FAD-linked sulfhydryl oxidase ALR OS=Rattus norvegicus OX=10116 GN=Gfer PE=1 SV=2)
79712	hypothetical protein	1635	15.02	195.805	8.48081	3.0842	6.01e-05	0.00144614	yes	up	XP_024777327.1(hypothetical protein M431DRAFT_79712 [Trichoderma harzianum CBS 226.95])	GO:0004512(molecular_function:inositol-3-phosphate synthase activity); GO:0006021(biological_process:inositol biosynthetic process); GO:0008654(biological_process:phospholipid biosynthetic process)	K01858	INO1, ISYNA1	map00562(Inositol phosphate metabolism)	COG1260(I:Lipid transport and metabolism)	COG1260(synthase)	PF07994.9(NAD_binding_5:Myo-inositol-1-phosphate synthase); PF01658.14(Inos-1-P_synth:Myo-inositol-1-phosphate synthase)	sp|Q54N49|INO1_DICDI(Inositol-3-phosphate synthase OS=Dictyostelium discoideum OX=44689 GN=ino1 PE=3 SV=1)
2292	hypothetical protein	2397	28.35	375.56	7.86514	2.97547	5.91e-05	0.00143024	yes	up	XP_024779416.1(hypothetical protein M431DRAFT_2292 [Trichoderma harzianum CBS 226.95])		K20520	DBNL, ABP1		ENOG410XRVX(S:Function unknown)	ENOG410XRVX(Drebrin-like)	PF14604.3(SH3_9:Variant SH3 domain); PF00018.25(SH3_1:SH3 domain); PF07653.14(SH3_2:Variant SH3 domain); PF00241.17(Cofilin_ADF:Cofilin/tropomyosin-type actin-binding protein)	sp|Q6GM14|DBNLB_XENLA(Drebrin-like protein B OS=Xenopus laevis OX=8355 GN=dbnl-b PE=2 SV=1)
514392	hypothetical protein	2406	0	2.125	177.074	7.46821	5.87e-05	0.00142848	yes	up	XP_024767082.1(hypothetical protein M431DRAFT_514392 [Trichoderma harzianum CBS 226.95])					ENOG410XQ9G(S:Function unknown); ENOG410YCEQ(S:Function unknown)	ENOG410XQ9G(GAL4); ENOG410YCEQ(-)	PF00172.15(Zn_clus:Fungal Zn(2)-Cys(6) binuclear cluster domain)	sp|A0A0N6WJC7|DHC4_ALTCI(Dehydrocurvularin biosynthesis regulator OS=Alternaria cinerariae OX=216837 GN=Dhc4 PE=2 SV=1)
480915	hypothetical protein	1581	1.21	18.01	9.81695	3.29527	5.1e-05	0.00127057	yes	up	XP_024775055.1(hypothetical protein M431DRAFT_480915 [Trichoderma harzianum CBS 226.95])	GO:0022891(molecular_function:substrate-specific transmembrane transporter activity); GO:0016021(cellular_component:integral component of membrane); GO:0055085(biological_process:transmembrane transport)				ENOG410XNQK(S:Function unknown)	ENOG410XNQK(C6 transcription factor)	PF00083.21(Sugar_tr:Sugar (and other) transporter); PF07690.13(MFS_1:Major Facilitator Superfamily)	sp|P53048|MAL11_YEAST(General alpha-glucoside permease OS=Saccharomyces cerevisiae (strain ATCC 204508 / S288c) OX=559292 GN=MAL11 PE=1 SV=1)
109148	hypothetical protein	2857	16.065	172.15	7.11464	2.83079	4.77e-05	0.00120438	yes	up	XP_024777267.1(hypothetical protein M431DRAFT_109148 [Trichoderma harzianum CBS 226.95])	GO:0005737(cellular_component:cytoplasm); GO:0048278(biological_process:vesicle docking); GO:0006887(biological_process:exocytosis)	K19984	EXOC5, SEC10		ENOG410XSQQ(U:Intracellular trafficking, secretion, and vesicular transport)	ENOG410XSQQ(Exocyst complex component)	PF07393.8(Sec10:Exocyst complex component Sec10)	sp|Q06245|SEC10_YEAST(Exocyst complex component SEC10 OS=Saccharomyces cerevisiae (strain ATCC 204508 / S288c) OX=559292 GN=SEC10 PE=1 SV=1)
92323	hypothetical protein	1236	16.185	191.515	7.90314	2.98243	4.61e-05	0.00117262	yes	up	XP_024771410.1(hypothetical protein M431DRAFT_92323 [Trichoderma harzianum CBS 226.95])	GO:0004739(molecular_function:pyruvate dehydrogenase (acetyl-transferring) activity); GO:0006086(biological_process:acetyl-CoA biosynthetic process from pyruvate); GO:0043231(cellular_component:intracellular membrane-bounded organelle); GO:0055114(biological_process:oxidation-reduction process)	K00161	PDHA, pdhA	map00010(Glycolysis / Gluconeogenesis); map00020(Citrate cycle (TCA cycle)); map00620(Pyruvate metabolism)	COG1071(C:Energy production and conversion)	COG1071(Dehydrogenase)	PF00676.17(E1_dh:Dehydrogenase E1 component)	sp|P16387|ODPA_YEAST(Pyruvate dehydrogenase E1 component subunit alpha, mitochondrial OS=Saccharomyces cerevisiae (strain ATCC 204508 / S288c) OX=559292 GN=PDA1 PE=1 SV=2)
477556	hypothetical protein	1890	0	3.055	186.657	7.54425	4.52e-05	0.00115488	yes	up	XP_024780855.1(hypothetical protein M431DRAFT_477556 [Trichoderma harzianum CBS 226.95])					ENOG410Y217(S:Function unknown)	ENOG410Y217(-)
77627	hypothetical protein	1386	0.545	12.825	15.0263	3.90941	4.5e-05	0.00115381	yes	up	XP_024777512.1(hypothetical protein M431DRAFT_77627 [Trichoderma harzianum CBS 226.95])	GO:0005737(cellular_component:cytoplasm); GO:0016310(biological_process:phosphorylation); GO:0008299(biological_process:isoprenoid biosynthetic process); GO:0004496(molecular_function:mevalonate kinase activity); GO:0005524(molecular_function:ATP binding)	K00869	E2.7.1.36, MVK, mvaK1	map00900(Terpenoid backbone biosynthesis); map04146(Peroxisome)	COG1577(I:Lipid transport and metabolism)	COG1577(mevalonate kinase)	PF00288.23(GHMP_kinases_N:GHMP kinases N terminal domain); PF08544.10(GHMP_kinases_C:GHMP kinases C terminal)	sp|P07277|KIME_YEAST(Mevalonate kinase OS=Saccharomyces cerevisiae (strain ATCC 204508 / S288c) OX=559292 GN=ERG12 PE=1 SV=1)
8345	hypothetical protein	618	0.835	27.6	22.2819	4.4778	4.43e-05	0.00114056	yes	up	XP_024770746.1(hypothetical protein M431DRAFT_8345 [Trichoderma harzianum CBS 226.95])	GO:0055114(biological_process:oxidation-reduction process); GO:0016491(molecular_function:oxidoreductase activity)	K07078	K07078		COG3560(S:Function unknown)	COG3560(Nitroreductase)	PF00881.21(Nitroreductase:Nitroreductase family)	sp|Q96VH4|HBN1_YEAST(Putative nitroreductase HBN1 OS=Saccharomyces cerevisiae (strain ATCC 204508 / S288c) OX=559292 GN=HBN1 PE=1 SV=1)
104545	hypothetical protein	4271	0.15	3.25	14.5303	3.861	4.38e-05	0.00112926	yes	up	XP_024780448.1(hypothetical protein M431DRAFT_104545 [Trichoderma harzianum CBS 226.95])	GO:0016021(cellular_component:integral component of membrane); GO:0016020(cellular_component:membrane)				ENOG410XR8V(U:Intracellular trafficking, secretion, and vesicular transport)	ENOG410XR8V(Adaptor-related protein complex)	PF13515.3(FUSC_2:Fusaric acid resistance protein-like); PF10334.6(ArAE_2:Aromatic acid exporter family member 2); PF10337.6(ArAE_2_N:Putative ER transporter, 6TM, N-terminal); PF11744.5(ALMT:Aluminium activated malate transporter)	sp|P53120|YGO0_YEAST(Uncharacterized membrane protein YGL140C OS=Saccharomyces cerevisiae (strain ATCC 204508 / S288c) OX=559292 GN=YGL140C PE=1 SV=1)
510619	hypothetical protein	1866	1.955	28.29	9.20907	3.20306	4.12e-05	0.00108254	yes	up	XP_024772131.1(hypothetical protein M431DRAFT_510619 [Trichoderma harzianum CBS 226.95])	GO:0022626(cellular_component:cytosolic ribosome); GO:0000027(biological_process:ribosomal large subunit assembly)	K14818	SQT1		ENOG410XR6A(S:Function unknown)	ENOG410XR6A(Angio-associated migratory cell protein)	PF00400.29(WD40:WD domain, G-beta repeat)	sp|O13982|YEC8_SCHPO(Uncharacterized WD repeat-containing protein C25H1.08c OS=Schizosaccharomyces pombe (strain 972 / ATCC 24843) OX=284812 GN=SPAC25H1.08c PE=4 SV=1)
96340	hypothetical protein	906	0.37	17.78	31.4575	4.97533	3.94e-05	0.00103737	yes	up	XP_024769945.1(hypothetical protein M431DRAFT_96340 [Trichoderma harzianum CBS 226.95])	GO:0005634(cellular_component:nucleus); GO:0006555(biological_process:methionine metabolic process); GO:0019379(biological_process:sulfate assimilation, phosphoadenylyl sulfate reduction by phosphoadenylyl-sulfate reductase (thioredoxin)); GO:0004604(molecular_function:phosphoadenylyl-sulfate reductase (thioredoxin) activity); GO:0009086(biological_process:methionine biosynthetic process); GO:000…	K00390	cysH	map00920(Sulfur metabolism)	COG0175(S:Function unknown)	COG0175(KR domain)	PF01507.16(PAPS_reduct:Phosphoadenosine phosphosulfate reductase family)	sp|P56859|MET16_EMENI(Phosphoadenosine phosphosulfate reductase OS=Emericella nidulans (strain FGSC A4 / ATCC 38163 / CBS 112.46 / NRRL 194 / M139) OX=227321 GN=sA PE=3 SV=3)
506004	hypothetical protein	1500	2.45	38.13	10.2542	3.35814	3.89e-05	0.00102686	yes	up	XP_024775939.1(hypothetical protein M431DRAFT_506004 [Trichoderma harzianum CBS 226.95])	GO:0050661(molecular_function:NADP binding); GO:0004412(molecular_function:homoserine dehydrogenase activity); GO:0009090(biological_process:homoserine biosynthetic process); GO:0009088(biological_process:threonine biosynthetic process); GO:0009097(biological_process:isoleucine biosynthetic process); GO:0009086(biological_process:methionine biosynthetic process); GO:0055114(biological_process:oxi…	K00003	hom	map00260(Glycine, serine and threonine metabolism); map00270(Cysteine and methionine metabolism); map00300(Lysine biosynthesis)	COG0460(E:Amino acid transport and metabolism)	COG0460(homoserine dehydrogenase)	PF00742.16(Homoserine_dh:Homoserine dehydrogenase); PF03447.13(NAD_binding_3:Homoserine dehydrogenase, NAD binding domain)	sp|Q5B998|DHOM_EMENI(Homoserine dehydrogenase OS=Emericella nidulans (strain FGSC A4 / ATCC 38163 / CBS 112.46 / NRRL 194 / M139) OX=227321 GN=AN2882 PE=1 SV=1)
502278	hypothetical protein	1941	0.11	5.1	30.313	4.92187	3.82e-05	0.00101453	yes	up	XP_024779837.1(hypothetical protein M431DRAFT_502278 [Trichoderma harzianum CBS 226.95])					ENOG410YSJZ(S:Function unknown)	ENOG410YSJZ(-)
486211	glycoside hydrolase family 76 protein	1746	12.8	144.09	7.50038	2.90696	3.39e-05	0.000936637	yes	up	XP_024769930.1(glycoside hydrolase family 76 protein [Trichoderma harzianum CBS 226.95])	GO:0016021(cellular_component:integral component of membrane); GO:0016020(cellular_component:membrane); GO:0016052(biological_process:carbohydrate catabolic process); GO:0005783(cellular_component:endoplasmic reticulum); GO:0008496(molecular_function:mannan endo-1,6-alpha-mannosidase activity)	K08257	E3.2.1.101		ENOG410XTMT(L:Replication, recombination and repair); COG2124(L:Replication, recombination and repair)	ENOG410XTMT(Transcription termination factor, RNA polymerase II); COG2124(Transcription termination factor, RNA polymerase II)	PF03663.11(Glyco_hydro_76:Glycosyl hydrolase family 76)	sp|Q6FLP9|DCW1_CANGA(Mannan endo-1,6-alpha-mannosidase DCW1 OS=Candida glabrata (strain ATCC 2001 / CBS 138 / JCM 3761 / NBRC 0622 / NRRL Y-65) OX=284593 GN=DCW1 PE=3 SV=1)
495447	hypothetical protein	1029	0.06	12.81	139.953	7.1288	3.14e-05	0.000879023	yes	up	XP_024774909.1(hypothetical protein M431DRAFT_495447 [Trichoderma harzianum CBS 226.95])
504059	hypothetical protein	1344	6.37	80.59	8.20978	3.03734	3.12e-05	0.000875283	yes	up	XP_024778776.1(hypothetical protein M431DRAFT_504059 [Trichoderma harzianum CBS 226.95])	GO:0005622(cellular_component:intracellular); GO:0030837(biological_process:negative regulation of actin filament polymerization); GO:0044396(biological_process:actin cortical patch organization); GO:0051015(molecular_function:actin filament binding); GO:0051014(biological_process:actin filament severing); GO:0003779(molecular_function:actin binding); GO:0042989(biological_process:sequestering of…	K08870	TWF		ENOG410XS1J(S:Function unknown)	ENOG410XS1J(Twinfilin, actin-binding protein, homolog)	PF00241.17(Cofilin_ADF:Cofilin/tropomyosin-type actin-binding protein)	sp|Q869T1|TWF_DICDI(Twinfilin OS=Dictyostelium discoideum OX=44689 GN=twfA PE=1 SV=1)
113828	hypothetical protein	466	39.635	570.095	9.82638	3.29666	3.01e-05	0.000853033	yes	up	XP_024775349.1(hypothetical protein M431DRAFT_113828 [Trichoderma harzianum CBS 226.95])	GO:0015935(cellular_component:small ribosomal subunit); GO:0003735(molecular_function:structural constituent of ribosome); GO:0000462(biological_process:maturation of SSU-rRNA from tricistronic rRNA transcript (SSU-rRNA, 5.8S rRNA, LSU-rRNA)); GO:0003723(molecular_function:RNA binding); GO:0006412(biological_process:translation); GO:0022627(cellular_component:cytosolic small ribosomal subunit)	K02969	RP-S20e, RPS20	map03010(Ribosome)	COG0051(J:Translation, ribosomal structure and biogenesis)	COG0051(tRNA binding)	PF00338.19(Ribosomal_S10:Ribosomal protein S10p/S20e)	sp|O74893|RS20_SCHPO(40S ribosomal protein S20 OS=Schizosaccharomyces pombe (strain 972 / ATCC 24843) OX=284812 GN=rps20 PE=1 SV=1)
9628	hypothetical protein	1995	0.21	10.04	29.7736	4.89596	2.99e-05	0.00085226	yes	up	XP_024769448.1(hypothetical protein M431DRAFT_9628 [Trichoderma harzianum CBS 226.95])	GO:0006508(biological_process:proteolysis); GO:0016021(cellular_component:integral component of membrane); GO:0004190(molecular_function:aspartic-type endopeptidase activity)				ENOG410Y9NG(S:Function unknown); ENOG4111AYM(S:Function unknown); ENOG4111H4B(S:Function unknown)	ENOG410Y9NG(Eukaryotic aspartyl protease); ENOG4111AYM(-); ENOG4111H4B(-)	PF00026.20(Asp:Eukaryotic aspartyl protease)	sp|P32329|YPS1_YEAST(Aspartic proteinase 3 OS=Saccharomyces cerevisiae (strain ATCC 204508 / S288c) OX=559292 GN=YPS1 PE=1 SV=2)
509001	hypothetical protein	1973	5.005	71.53	9.03262	3.17515	2.75e-05	0.000791696	yes	up	XP_024773647.1(hypothetical protein M431DRAFT_509001 [Trichoderma harzianum CBS 226.95])	GO:0005737(cellular_component:cytoplasm); GO:0006457(biological_process:protein folding); GO:0005634(cellular_component:nucleus); GO:0051082(molecular_function:unfolded protein binding); GO:0005832(cellular_component:chaperonin-containing T-complex); GO:0005524(molecular_function:ATP binding)	K09493	CCT1, TCP1		COG0459(S:Function unknown)	COG0459(-)	PF00118.21(Cpn60_TCP1:TCP-1/cpn60 chaperonin family)	sp|O94501|TCPA_SCHPO(T-complex protein 1 subunit alpha OS=Schizosaccharomyces pombe (strain 972 / ATCC 24843) OX=284812 GN=cct1 PE=3 SV=1)
95796	hypothetical protein	2259	2.15	39.68	11.3883	3.50948	2.67e-05	0.000777733	yes	up	XP_024769684.1(hypothetical protein M431DRAFT_95796 [Trichoderma harzianum CBS 226.95])	GO:0008270(molecular_function:zinc ion binding)				ENOG410ZJAG(S:Function unknown)	ENOG410ZJAG(-)	PF09733.6(VEFS-Box:VEFS-Box of polycomb protein)
115899	hypothetical protein	2361	1.12	19.05	11.3201	3.50082	2.01e-05	0.000620758	yes	up	XP_024774540.1(hypothetical protein M431DRAFT_115899 [Trichoderma harzianum CBS 226.95])	GO:0005737(cellular_component:cytoplasm); GO:0004812(molecular_function:aminoacyl-tRNA ligase activity); GO:0004815(molecular_function:aspartate-tRNA ligase activity); GO:0070146(biological_process:mitochondrial aspartyl-tRNA aminoacylation); GO:0005739(cellular_component:mitochondrion); GO:0006418(biological_process:tRNA aminoacylation for protein translation); GO:0005524(molecular_function:ATP …	K01876	aspS	map00970(Aminoacyl-tRNA biosynthesis)	COG0173(J:Translation, ribosomal structure and biogenesis)	COG0173(aspartyl-trna synthetase)	PF00152.17(tRNA-synt_2:tRNA synthetases class II (D, K and N))	sp|O94242|SYDM_SCHPO(Aspartate--tRNA ligase, mitochondrial OS=Schizosaccharomyces pombe (strain 972 / ATCC 24843) OX=284812 GN=msd1 PE=3 SV=1)
309277	hypothetical protein	1306	10.225	161.515	10.7812	3.43044	1.97e-05	0.000613396	yes	up	XP_024779292.1(hypothetical protein M431DRAFT_309277 [Trichoderma harzianum CBS 226.95])					ENOG41126J1(S:Function unknown)	ENOG41126J1(Optic atrophy 3 protein (OPA3))	PF07047.9(OPA3:Optic atrophy 3 protein (OPA3)); PF10883.5(DUF2681:Protein of unknown function (DUF2681))
466396	hypothetical protein	1164	2.785	84.435	17.7836	4.15248	1.77e-05	0.000563567	yes	up	XP_024772262.1(hypothetical protein M431DRAFT_466396 [Trichoderma harzianum CBS 226.95])					ENOG410XQRX(S:Function unknown)	ENOG410XQRX(Testis-specific Y-encoded-like protein)	PF00956.15(NAP:Nucleosome assembly protein (NAP))	sp|Q01105|SET_HUMAN(Protein SET OS=Homo sapiens OX=9606 GN=SET PE=1 SV=3)
121542	hypothetical protein	725	5.04	80.93	10.6419	3.41168	1.67e-05	0.000539272	yes	up	XP_024771283.1(hypothetical protein M431DRAFT_121542 [Trichoderma harzianum CBS 226.95])	GO:0055114(biological_process:oxidation-reduction process); GO:0005739(cellular_component:mitochondrion); GO:0016491(molecular_function:oxidoreductase activity)				ENOG4111UI5(S:Function unknown)	ENOG4111UI5(Conserved hypothetical, protein)	PF07955.8(DUF1687:Protein of unknown function (DUF1687))
510385	hypothetical protein	2256	0.92	16.17	11.3886	3.50951	1.63e-05	0.000535451	yes	up	XP_024771869.1(hypothetical protein M431DRAFT_510385 [Trichoderma harzianum CBS 226.95])	GO:0016021(cellular_component:integral component of membrane); GO:0055085(biological_process:transmembrane transport)				ENOG410XNQK(G:Carbohydrate transport and metabolism)	ENOG410XNQK(Transporter)	PF07690.13(MFS_1:Major Facilitator Superfamily); PF00083.21(Sugar_tr:Sugar (and other) transporter)	sp|W7MLD3|FUS6_GIBM7(Efflux pump FUS6 OS=Gibberella moniliformis (strain M3125 / FGSC 7600) OX=334819 GN=FUS6 PE=3 SV=1)
81741	hypothetical protein	2373	4.02	48.535	8.40072	3.07051	1.6e-05	0.000527845	yes	up	XP_024776059.1(hypothetical protein M431DRAFT_81741 [Trichoderma harzianum CBS 226.95])	GO:0016021(cellular_component:integral component of membrane); GO:0016020(cellular_component:membrane)				ENOG410YBCK(S:Function unknown)	ENOG410YBCK(Conserved hypothetical, protein)	PF13854.3(Kelch_5:Kelch motif); PF13418.3(Kelch_4:Galactose oxidase, central domain); PF13415.3(Kelch_3:Galactose oxidase, central domain)	sp|D4AYG1|KLDC1_ARTBC(Kelch repeat-containing protein ARB_01230 OS=Arthroderma benhamiae (strain ATCC MYA-4681 / CBS 112371) OX=663331 GN=ARB_01230 PE=1 SV=1)
140719	hypothetical protein	1931	5.49	93.005	10.751	3.4264	1.46e-05	0.000490336	yes	up	XP_024775160.1(hypothetical protein M431DRAFT_140719 [Trichoderma harzianum CBS 226.95])	GO:0005737(cellular_component:cytoplasm); GO:0006457(biological_process:protein folding); GO:0005634(cellular_component:nucleus); GO:0051082(molecular_function:unfolded protein binding); GO:0005832(cellular_component:chaperonin-containing T-complex); GO:0005524(molecular_function:ATP binding)	K09498	CCT6		ENOG410XQ3Q(O:Posttranslational modification, protein turnover, chaperones)	ENOG410XQ3Q(t-complex protein 1 subunit)	PF00118.21(Cpn60_TCP1:TCP-1/cpn60 chaperonin family)	sp|O94515|TCPZ_SCHPO(T-complex protein 1 subunit zeta OS=Schizosaccharomyces pombe (strain 972 / ATCC 24843) OX=284812 GN=cct6 PE=3 SV=1)
139170	hypothetical protein	1939	5	78.02	9.84665	3.29963	1.41e-05	0.000475837	yes	up	XP_024776379.1(hypothetical protein M431DRAFT_139170 [Trichoderma harzianum CBS 226.95])	GO:0005737(cellular_component:cytoplasm); GO:0051082(molecular_function:unfolded protein binding); GO:0006457(biological_process:protein folding); GO:0005524(molecular_function:ATP binding); GO:0005832(cellular_component:chaperonin-containing T-complex)	K09500	CCT8		ENOG410XPXR(O:Posttranslational modification, protein turnover, chaperones)	ENOG410XPXR(t-complex protein 1)	PF00118.21(Cpn60_TCP1:TCP-1/cpn60 chaperonin family)	sp|P78921|TCPQ_SCHPO(Probable T-complex protein 1 subunit theta OS=Schizosaccharomyces pombe (strain 972 / ATCC 24843) OX=284812 GN=cct8 PE=2 SV=3)
93243	glycosyltransferase family 8 protein	1674	21.885	333.3	9.63998	3.26903	1.36e-05	0.000464287	yes	up	XP_024770744.1(glycosyltransferase family 8 protein [Trichoderma harzianum CBS 226.95])	GO:0016757(molecular_function:transferase activity, transferring glycosyl groups)	K00750	GYG1, GYG2	map00500(Starch and sucrose metabolism)	COG5597(S:Function unknown)	COG5597(Regulation of nuclear pre-mRNA domain containing)	PF01501.17(Glyco_transf_8:Glycosyl transferase family 8)	sp|H2KYQ5|GYG1_CAEEL(Glycogenin-1 OS=Caenorhabditis elegans OX=6239 GN=gyg-1 PE=1 SV=1)
110001	hypothetical protein	1251	0	6.195	241.005	7.91292	1.21e-05	0.000422256	yes	up	XP_024777671.1(hypothetical protein M431DRAFT_110001 [Trichoderma harzianum CBS 226.95])	GO:0003824(molecular_function:catalytic activity); GO:0030170(molecular_function:pyridoxal phosphate binding)				COG0626(E:Amino acid transport and metabolism)	COG0626(cystathionine)	PF01053.17(Cys_Met_Meta_PP:Cys/Met metabolism PLP-dependent enzyme)	sp|P38716|YHR2_YEAST(Uncharacterized trans-sulfuration enzyme YHR112C OS=Saccharomyces cerevisiae (strain ATCC 204508 / S288c) OX=559292 GN=YHR112C PE=1 SV=1)
484573	hypothetical protein	711	33.23	635.345	13.0719	3.70839	1.06e-05	0.000379189	yes	up	XP_024771269.1(hypothetical protein M431DRAFT_484573 [Trichoderma harzianum CBS 226.95])					ENOG410YXYV(S:Function unknown)	ENOG410YXYV(CFEM domain)	PF05730.8(CFEM:CFEM domain)
525317	hypothetical protein	1398	0.04	11.045	178.334	7.47844	9.46e-06	0.00034761	yes	up	XP_024768244.1(hypothetical protein M431DRAFT_525317 [Trichoderma harzianum CBS 226.95])	GO:0008270(molecular_function:zinc ion binding); GO:0055114(biological_process:oxidation-reduction process); GO:0016491(molecular_function:oxidoreductase activity)				COG1064(S:Function unknown)	COG1064(-)	PF00107.23(ADH_zinc_N:Zinc-binding dehydrogenase); PF08240.9(ADH_N:Alcohol dehydrogenase GroES-like domain); PF13602.3(ADH_zinc_N_2:Zinc-binding dehydrogenase); PF02826.16(2-Hacid_dh_C:D-isomer specific 2-hydroxyacid dehydrogenase, NAD binding domain)	sp|Q04894|ADH6_YEAST(NADP-dependent alcohol dehydrogenase 6 OS=Saccharomyces cerevisiae (strain ATCC 204508 / S288c) OX=559292 GN=ADH6 PE=1 SV=1)
78458	hypothetical protein	954	0	9.625	266.14	8.05604	8.81e-06	0.000329263	yes	up	XP_024777825.1(hypothetical protein M431DRAFT_78458, partial [Trichoderma harzianum CBS 226.95])					ENOG410YEY7(F:Nucleotide transport and metabolism); ENOG410YC2Z(S:Function unknown); ENOG410YKJ0(S:Function unknown)	ENOG410YEY7(Catalyzes the irreversible cleavage of the glycosidic bond in both 5'-methylthioadenosine (MTA) and S- adenosylhomocysteine (SAH AdoHcy) to adenine and the corresponding thioribose, 5'-methylthioribose and S-ribosylhomocysteine, respectively (By similarity)); ENOG410YC2Z(-); ENOG410YKJ0(-)	PF01926.20(MMR_HSR1:50S ribosome-binding GTPase); PF02421.15(FeoB_N:Ferrous iron transport protein B); PF04548.13(AIG1:AIG1 family)
121257	hypothetical protein	1090	14.81	209.78	9.31683	3.21984	8.6e-06	0.000322532	yes	up	XP_024772129.1(hypothetical protein M431DRAFT_121257 [Trichoderma harzianum CBS 226.95])	GO:0006878(biological_process:cellular copper ion homeostasis); GO:0016021(cellular_component:integral component of membrane); GO:0008535(biological_process:respiratory chain complex IV assembly); GO:0005743(cellular_component:mitochondrial inner membrane); GO:0006825(biological_process:copper ion transport); GO:0005507(molecular_function:copper ion binding)	K07152	SCO1_2		COG1999(S:Function unknown)	COG1999(Electron transport protein SCO1 SenC)	PF02630.11(SCO1-SenC:SCO1/SenC)	sp|P23833|SCO1_YEAST(Protein SCO1, mitochondrial OS=Saccharomyces cerevisiae (strain ATCC 204508 / S288c) OX=559292 GN=SCO1 PE=1 SV=1)
505436	hypothetical protein	989	17.705	254.46	9.89713	3.30701	7.5e-06	0.000284041	yes	up	XP_024777555.1(hypothetical protein M431DRAFT_505436 [Trichoderma harzianum CBS 226.95])	GO:0006228(biological_process:UTP biosynthetic process); GO:0016021(cellular_component:integral component of membrane); GO:0005524(molecular_function:ATP binding); GO:0006974(biological_process:cellular response to DNA damage stimulus); GO:0006241(biological_process:CTP biosynthetic process); GO:0004550(molecular_function:nucleoside diphosphate kinase activity); GO:0042802(molecular_function:iden…	K00940	ndk, NME	map00230(Purine metabolism); map00240(Pyrimidine metabolism)	COG0105(F:Nucleotide transport and metabolism)	COG0105(Major role in the synthesis of nucleoside triphosphates other than ATP. The ATP gamma phosphate is transferred to the NDP beta phosphate via a ping-pong mechanism, using a phosphorylated active-site intermediate (By similarity))	PF00334.16(NDK:Nucleoside diphosphate kinase)	sp|Q7Z8P9|NDK_ASPFU(Nucleoside diphosphate kinase OS=Neosartorya fumigata (strain ATCC MYA-4609 / Af293 / CBS 101355 / FGSC A1100) OX=330879 GN=ndk1 PE=3 SV=1)
510039	hypothetical protein	568	26.445	378.335	9.53625	3.25342	7.11e-06	0.000272366	yes	up	XP_013961459.1(hypothetical protein TRIVIDRAFT_175991 [Trichoderma virens Gv29-8])	GO:0006626(biological_process:protein targeting to mitochondrion); GO:0044444(cellular_component:cytoplasmic part); GO:0043231(cellular_component:intracellular membrane-bounded organelle); GO:0044743(biological_process:intracellular protein transmembrane import); GO:1990542(biological_process:mitochondrial transmembrane transport)	K17771	TOM7		ENOG41122H5(S:Function unknown); ENOG410XPAJ(S:Function unknown)	ENOG41122H5(TOM7 family); ENOG410XPAJ(solute carrier family 25 (mitochondrial folate)	PF08038.9(Tom7:TOM7 family)
485528	hypothetical protein	1167	55.54	949.44	11.536	3.52807	6.9e-06	0.000269677	yes	up	XP_024770497.1(hypothetical protein M431DRAFT_485528 [Trichoderma harzianum CBS 226.95])					ENOG410YVW7(S:Function unknown)	ENOG410YVW7(Dna repair protein)	PF05347.12(Complex1_LYR:Complex 1 protein (LYR family))
4932	hypothetical protein	1443	42.4	567.79	8.69136	3.11958	6.91e-06	0.000269677	yes	up	PNP60237.1(hypothetical protein THARTR1_00261 [Trichoderma harzianum])	GO:0051285(cellular_component:cell cortex of cell tip)				ENOG410YA6Z(S:Function unknown)	ENOG410YA6Z(PH domain protein)	PF01442.15(Apolipoprotein:Apolipoprotein A1/A4/E domain); PF00169.26(PH:PH domain)	sp|O94447|SLM1_SCHPO(Cytoskeletal signaling protein slm1 OS=Schizosaccharomyces pombe (strain 972 / ATCC 24843) OX=284812 GN=slm1 PE=1 SV=1)
510479	hypothetical protein	1618	2.19	37.74	11.1743	3.48211	5.58e-06	0.000225936	yes	up	XP_024771971.1(hypothetical protein M431DRAFT_510479 [Trichoderma harzianum CBS 226.95])	GO:0055114(biological_process:oxidation-reduction process); GO:0016491(molecular_function:oxidoreductase activity)	K00293	LYS9	map00300(Lysine biosynthesis); map00310(Lysine degradation)	COG1748(E:Amino acid transport and metabolism)	COG1748(homoserine O-acetyltransferase)	PF16653.2(Sacchrp_dh_C:Saccharopine dehydrogenase C-terminal domain); PF03435.15(Sacchrp_dh_NADP:Saccharopine dehydrogenase NADP binding domain); PF13460.3(NAD_binding_10:NAD(P)H-binding); PF01488.17(Shikimate_DH:Shikimate / quinate 5-dehydrogenase); PF03807.14(F420_oxidored:NADP oxidoreductase coenzyme F420-dependent)	sp|Q9P4R4|LYS9_MAGO7(Saccharopine dehydrogenase [NADP(+), L-glutamate-forming] OS=Magnaporthe oryzae (strain 70-15 / ATCC MYA-4617 / FGSC 8958) OX=242507 GN=LYS3 PE=1 SV=2)
503174	hypothetical protein	1601	36.41	481.045	9.10772	3.18709	5.22e-06	0.000218338	yes	up	XP_024780678.1(hypothetical protein M431DRAFT_503174 [Trichoderma harzianum CBS 226.95])	GO:0006633(biological_process:fatty acid biosynthetic process); GO:0000254(molecular_function:C-4 methylsterol oxidase activity); GO:0016021(cellular_component:integral component of membrane); GO:0005886(cellular_component:plasma membrane); GO:0005789(cellular_component:endoplasmic reticulum membrane); GO:0006696(biological_process:ergosterol biosynthetic process); GO:0005506(molecular_function:i…	K07750	MESO1, ERG25	map00100(Steroid biosynthesis)	COG3000(I:Lipid transport and metabolism)	COG3000(fatty acid hydroxylase)	PF04116.10(FA_hydroxylase:Fatty acid hydroxylase superfamily)	sp|P53045|MSMO_YEAST(Methylsterol monooxygenase OS=Saccharomyces cerevisiae (strain ATCC 204508 / S288c) OX=559292 GN=ERG25 PE=1 SV=1)
82286	hypothetical protein	873	2.82	67.525	15.6138	3.96475	4.97e-06	0.000208921	yes	up	PKK51058.1(hypothetical protein CI102_4619 [Trichoderma harzianum])	GO:0005759(cellular_component:mitochondrial matrix)	K15414	C1QBP		ENOG4111MS5(S:Function unknown)	ENOG4111MS5(Mitochondrial glycoprotein family protein)	PF02330.13(MAM33:Mitochondrial glycoprotein)	sp|P40513|MAM33_YEAST(Mitochondrial acidic protein MAM33 OS=Saccharomyces cerevisiae (strain ATCC 204508 / S288c) OX=559292 GN=MAM33 PE=1 SV=1)
505607	hypothetical protein	929	19.435	401.405	13.6725	3.77321	4.88e-06	0.000206303	yes	up	XP_024777727.1(hypothetical protein M431DRAFT_505607 [Trichoderma harzianum CBS 226.95])					ENOG410XVUS(S:Function unknown)	ENOG410XVUS(-)
477318	hypothetical protein	1755	6.365	99.095	10.3118	3.36622	4.86e-06	0.000206303	yes	up	XP_024780585.1(hypothetical protein M431DRAFT_477318 [Trichoderma harzianum CBS 226.95])	GO:0016021(cellular_component:integral component of membrane); GO:0055085(biological_process:transmembrane transport)	K07300;K20404	chaA, CAX;DEPDC5		COG0387(P:Inorganic ion transport and metabolism); ENOG410XQVG(S:Function unknown)	COG0387(Calcium Proton); ENOG410XQVG(DEP domain containing 5)	PF01699.21(Na_Ca_ex:Sodium/calcium exchanger protein)	sp|Q75XW3|CAX_APHHA(Ca(2+)/H(+) antiporter OS=Aphanothece halophytica OX=72020 PE=1 SV=1)
72064	hypothetical protein	726	0	18.83	314.195	8.29552	3.25e-06	0.000145248	yes	up	XP_024779623.1(hypothetical protein M431DRAFT_72064 [Trichoderma harzianum CBS 226.95])	GO:0004826(molecular_function:phenylalanine-tRNA ligase activity); GO:0003723(molecular_function:RNA binding)				COG3382(S:Function unknown)	COG3382(B3 4 domain protein)	PF03483.14(B3_4:B3/4 domain)
3666	hypothetical protein	870	10.8	194.98	11.6143	3.53783	2.64e-06	0.000122859	yes	up	XP_024776179.1(hypothetical protein M431DRAFT_3666 [Trichoderma harzianum CBS 226.95])	GO:0005737(cellular_component:cytoplasm); GO:0006796(biological_process:phosphate-containing compound metabolic process); GO:0000287(molecular_function:magnesium ion binding); GO:0005634(cellular_component:nucleus); GO:0004427(molecular_function:inorganic diphosphatase activity)	K01507	ppa	map00190(Oxidative phosphorylation)	COG0221(C:Energy production and conversion)	COG0221(Pyrophosphate phospho-hydrolase)	PF00719.16(Pyrophosphatase:Inorganic pyrophosphatase)	sp|Q6MVH7|IPYR_NEUCR(Inorganic pyrophosphatase OS=Neurospora crassa (strain ATCC 24698 / 74-OR23-1A / CBS 708.71 / DSM 1257 / FGSC 987) OX=367110 GN=ipp-1 PE=3 SV=1)
490769	hypothetical protein	1623	0	7.16	355.829	8.47504	1.63e-06	7.91e-05	yes	up	XP_024778828.1(hypothetical protein M431DRAFT_490769 [Trichoderma harzianum CBS 226.95])	GO:0055114(biological_process:oxidation-reduction process); GO:0016491(molecular_function:oxidoreductase activity)	K03885	ndh	map00190(Oxidative phosphorylation)	COG1252(C:Energy production and conversion)	COG1252(Nadh dehydrogenase)	PF07992.11(Pyr_redox_2:Pyridine nucleotide-disulphide oxidoreductase); PF00070.24(Pyr_redox:Pyridine nucleotide-disulphide oxidoreductase)	sp|Q55CD9|NDH_DICDI(Probable NADH dehydrogenase OS=Dictyostelium discoideum OX=44689 GN=DDB_G0270104 PE=3 SV=2)
143078	hypothetical protein	1970	4.435	73.065	11.0362	3.46417	1.63e-06	7.91e-05	yes	up	OPB44112.1(ATP-dependent RNA helicase DBP5 [Trichoderma guizhouense])	GO:0005737(cellular_component:cytoplasm); GO:0005844(cellular_component:polysome); GO:0000822(molecular_function:inositol hexakisphosphate binding); GO:0044614(cellular_component:nuclear pore cytoplasmic filaments); GO:0004386(molecular_function:helicase activity); GO:0003724(molecular_function:RNA helicase activity); GO:0006406(biological_process:mRNA export from nucleus); GO:0003676(molecular_f…	K18655	DDX19, DBP5		ENOG410XRGX(L:Replication, recombination and repair)	ENOG410XRGX(atp-dependent rna helicase)	PF00270.26(DEAD:DEAD/DEAH box helicase); PF00271.28(Helicase_C:Helicase conserved C-terminal domain); PF13245.3(AAA_19:Part of AAA domain)	sp|Q4HY71|DBP5_GIBZE(ATP-dependent RNA helicase DBP5 OS=Gibberella zeae (strain PH-1 / ATCC MYA-4620 / FGSC 9075 / NRRL 31084) OX=229533 GN=DBP5 PE=3 SV=1)
77971	hypothetical protein	1599	15.175	469.045	20.6292	4.36662	1.24e-06	6.38e-05	yes	up	XP_024777487.1(hypothetical protein M431DRAFT_77971 [Trichoderma harzianum CBS 226.95])	GO:0018345(biological_process:protein palmitoylation); GO:0016021(cellular_component:integral component of membrane); GO:0000329(cellular_component:fungal-type vacuole membrane); GO:0042144(biological_process:vacuole fusion, non-autophagic); GO:0019706(molecular_function:protein-cysteine S-palmitoyltransferase activity); GO:0008270(molecular_function:zinc ion binding)	K20028	ZDHHC2_15_20		COG5273(K:Transcription)	COG5273(transcription factor)	PF01529.17(zf-DHHC:DHHC palmitoyltransferase)	sp|Q4IA62|PFA3_GIBZE(Palmitoyltransferase PFA3 OS=Gibberella zeae (strain PH-1 / ATCC MYA-4620 / FGSC 9075 / NRRL 31084) OX=229533 GN=PFA3 PE=3 SV=1)
76483	hypothetical protein	822	2.575	65.055	17.0175	4.08895	1.04e-06	5.48e-05	yes	up	XP_024778519.1(hypothetical protein M431DRAFT_76483 [Trichoderma harzianum CBS 226.95])	GO:0006481(biological_process:C-terminal protein methylation); GO:0005783(cellular_component:endoplasmic reticulum); GO:0019538(biological_process:protein metabolic process); GO:0016021(cellular_component:integral component of membrane); GO:0005789(cellular_component:endoplasmic reticulum membrane); GO:0044446(cellular_component:intracellular organelle part); GO:0004671(molecular_function:protein…	K00587	ICMT, STE14	map00900(Terpenoid backbone biosynthesis)	COG2020(O:Posttranslational modification, protein turnover, chaperones)	COG2020(isoprenylcysteine carboxyl methyltransferase)	PF04140.11(ICMT:Isoprenylcysteine carboxyl methyltransferase (ICMT) family); PF04191.10(PEMT:Phospholipid methyltransferase)	sp|O12947|ICMT_XENLA(Protein-S-isoprenylcysteine O-methyltransferase OS=Xenopus laevis OX=8355 GN=icmt PE=2 SV=1)
94917	hypothetical protein	339	5.445	48.28	15.2343	3.92925	8.87e-07	4.8e-05	yes	up	XP_024770618.1(hypothetical protein M431DRAFT_94917 [Trichoderma harzianum CBS 226.95])					ENOG41127BV(S:Function unknown)	ENOG41127BV(Conserved hypothetical, protein)
129381	hypothetical protein	1619	0	7.615	385.228	8.58957	7.96e-07	4.39e-05	yes	up	XP_024767466.1(hypothetical protein M431DRAFT_129381 [Trichoderma harzianum CBS 226.95])	GO:0010181(molecular_function:FMN binding); GO:0055114(biological_process:oxidation-reduction process); GO:0016491(molecular_function:oxidoreductase activity)				COG1902(C:Energy production and conversion)	COG1902(NADH flavin oxidoreductase, NADH oxidase)	PF00724.17(Oxidored_FMN:NADH:flavin oxidoreductase / NADH oxidase family)	sp|B8N8Q9|AFVA_ASPFN(NADPH dehydrogenase afvA OS=Aspergillus flavus (strain ATCC 200026 / FGSC A1120 / NRRL 3357 / JCM 12722 / SRRC 167) OX=332952 GN=afvA PE=2 SV=1)
83575	hypothetical protein	1683	1.36	39.365	20.1235	4.33081	7.4e-07	4.11e-05	yes	up	XP_024775219.1(hypothetical protein M431DRAFT_83575 [Trichoderma harzianum CBS 226.95])	GO:0017177(cellular_component:glucosidase II complex); GO:0004558(molecular_function:alpha-1,4-glucosidase activity); GO:0000271(biological_process:polysaccharide biosynthetic process); GO:0006491(biological_process:N-glycan processing); GO:0005788(cellular_component:endoplasmic reticulum lumen)	K08288	PRKCSH	map04141(Protein processing in endoplasmic reticulum)	ENOG410XPE3(O:Posttranslational modification, protein turnover, chaperones)	ENOG410XPE3(protein kinase C substrate)	PF12999.4(PRKCSH-like:Glucosidase II beta subunit-like); PF13015.3(PRKCSH_1:Glucosidase II beta subunit-like protein); PF07915.10(PRKCSH:Glucosidase II beta subunit-like protein)	sp|Q9USH8|GLU2B_SCHPO(Glucosidase 2 subunit beta OS=Schizosaccharomyces pombe (strain 972 / ATCC 24843) OX=284812 GN=gtb1 PE=1 SV=1)
494998	hypothetical protein	1398	0	9.52	405.03	8.66189	5.67e-07	3.25e-05	yes	up	XP_024774449.1(hypothetical protein M431DRAFT_494998 [Trichoderma harzianum CBS 226.95])	GO:0016021(cellular_component:integral component of membrane); GO:0016020(cellular_component:membrane)				ENOG410Z92M(S:Function unknown); ENOG4111HKT(S:Function unknown); ENOG410YRCG(S:Function unknown); ENOG410YYAB(S:Function unknown); ENOG4111HQG(S:Function unknown); ENOG410YYI5(S:Function unknown)	ENOG410Z92M(-); ENOG4111HKT(-); ENOG410YRCG(-); ENOG410YYAB(-); ENOG4111HQG(-); ENOG410YYI5(-)
508346	hypothetical protein	1769	2.69	61.225	15.5459	3.95847	5.52e-07	3.21e-05	yes	up	XP_024774603.1(hypothetical protein M431DRAFT_508346 [Trichoderma harzianum CBS 226.95])	GO:0016747(molecular_function:transferase activity, transferring acyl groups other than amino-acyl groups); GO:0008152(biological_process:metabolic process)	K00626	E2.3.1.9, atoB	map00071(Fatty acid degradation); map00072(Synthesis and degradation of ketone bodies); map00280(Valine, leucine and isoleucine degradation); map00310(Lysine degradation); map00380(Tryptophan metabolism); map00620(Pyruvate metabolism); map00630(Glyoxylate and dicarboxylate metabolism); map00640(Propanoate metabolism); map00650(Butanoate metabolism); map00900(Terpenoid backbone biosynthesis)	COG0183(S:Function unknown)	COG0183(Family with sequence similarity 96, member)	PF00108.20(Thiolase_N:Thiolase, N-terminal domain); PF02803.15(Thiolase_C:Thiolase, C-terminal domain); PF00109.23(ketoacyl-synt:Beta-ketoacyl synthase, N-terminal domain)	sp|Q9UQW6|THIL_SCHPO(Acetyl-CoA acetyltransferase OS=Schizosaccharomyces pombe (strain 972 / ATCC 24843) OX=284812 GN=erg10 PE=2 SV=1)
511162	hypothetical protein	614	2.82	124.41	28.2377	4.81955	4.41e-07	2.75e-05	yes	up	XP_024770726.1(hypothetical protein M431DRAFT_511162 [Trichoderma harzianum CBS 226.95])	GO:0016021(cellular_component:integral component of membrane)	K00799	GST, gst	map00480(Glutathione metabolism)	ENOG4111URX(O:Posttranslational modification, protein turnover, chaperones)	ENOG4111URX(microsomal glutathione S-transferase)	PF01124.15(MAPEG:MAPEG family)
509367	hypothetical protein	1862	0.29	14	30.2917	4.92085	3.67e-07	2.54e-05	yes	up	XP_024774051.1(hypothetical protein M431DRAFT_509367 [Trichoderma harzianum CBS 226.95])	GO:0016747(molecular_function:transferase activity, transferring acyl groups other than amino-acyl groups)				ENOG4110K18(S:Function unknown); ENOG410XTI7(S:Function unknown)	ENOG4110K18(Transferase Family); ENOG410XTI7(Transferase family)	PF02458.12(Transferase:Transferase family)	sp|Q9SZ58|BRAT1_ARATH(Brassinosteroid-related acyltransferase 1 OS=Arabidopsis thaliana OX=3702 GN=BAT1 PE=2 SV=1)
511278	hypothetical protein	1236	1.06	34.43	21.618	4.43416	3.43e-07	2.41e-05	yes	up	XP_024770827.1(hypothetical protein M431DRAFT_511278 [Trichoderma harzianum CBS 226.95])	GO:0016311(biological_process:dephosphorylation); GO:0042132(molecular_function:fructose 1,6-bisphosphate 1-phosphatase activity); GO:0005975(biological_process:carbohydrate metabolic process)	K01100	E3.1.3.37		COG0158(S:Function unknown)	COG0158(-)	PF00316.17(FBPase:Fructose-1-6-bisphosphatase, N-terminal domain)	sp|O20252|S17P_SPIOL(Sedoheptulose-1,7-bisphosphatase, chloroplastic OS=Spinacia oleracea OX=3562 PE=2 SV=1)
430624	hypothetical protein	611	0	36.205	457.14	8.83649	3.15e-07	2.26e-05	yes	up	XP_024774525.1(hypothetical protein M431DRAFT_430624 [Trichoderma harzianum CBS 226.95])
482972	hypothetical protein	1176	3.51	88.545	16.8608	4.0756	2.56e-07	1.88e-05	yes	up	XP_024773832.1(hypothetical protein M431DRAFT_482972 [Trichoderma harzianum CBS 226.95])	GO:0016021(cellular_component:integral component of membrane)				ENOG410YDZ8(S:Function unknown); ENOG410YF8V(S:Function unknown); ENOG4111AT0(S:Function unknown)	ENOG410YDZ8(-); ENOG410YF8V(-); ENOG4111AT0(plasma membrane protein)
479546	hypothetical protein	1314	3.26	89.235	16.9466	4.08292	1.94e-07	1.47e-05	yes	up	PKK44002.1(hypothetical protein CI102_11534 [Trichoderma harzianum])	GO:0016021(cellular_component:integral component of membrane)	K10955	MUC2		ENOG410Z1NU(S:Function unknown); ENOG4110V6A(U:Intracellular trafficking, secretion, and vesicular transport)	ENOG410Z1NU(-); ENOG4110V6A(-)
3327	hypothetical protein	1419	3.82	154.525	28.2835	4.82189	1.86e-07	1.42e-05	yes	up	XP_024778026.1(hypothetical protein M431DRAFT_3327 [Trichoderma harzianum CBS 226.95])	GO:0016021(cellular_component:integral component of membrane); GO:0016020(cellular_component:membrane)				ENOG410ZHR9(U:Intracellular trafficking, secretion, and vesicular transport); ENOG410XNS4(E:Amino acid transport and metabolism)	ENOG410ZHR9(amino acid); ENOG410XNS4(amino acid)	PF01490.15(Aa_trans:Transmembrane amino acid transporter protein)	sp|P38680|MTR_NEUCR(N amino acid transport system protein OS=Neurospora crassa (strain ATCC 24698 / 74-OR23-1A / CBS 708.71 / DSM 1257 / FGSC 987) OX=367110 GN=mtr PE=3 SV=2)
4224	hypothetical protein	1236	0.535	29.765	34.9005	5.12518	1.34e-07	1.07e-05	yes	up	XP_024776829.1(hypothetical protein M431DRAFT_4224 [Trichoderma harzianum CBS 226.95])	GO:0010181(molecular_function:FMN binding); GO:0055114(biological_process:oxidation-reduction process); GO:0016491(molecular_function:oxidoreductase activity)				COG1902(G:Carbohydrate transport and metabolism)	COG1902(Oxalate decarboxylase)	PF00724.17(Oxidored_FMN:NADH:flavin oxidoreductase / NADH oxidase family); PF01207.14(Dus:Dihydrouridine synthase (Dus))	sp|Q6UEF0|NADA_ASPPU(NADH-dependent flavin oxidoreductase nadA OS=Aspergillus parasiticus (strain ATCC 56775 / NRRL 5862 / SRRC 143 / SU-1) OX=1403190 GN=nadA PE=2 SV=1)
81396	hypothetical protein	1992	4.895	117.35	15.3502	3.94019	1.08e-07	9.1e-06	yes	up	XP_024776312.1(hypothetical protein M431DRAFT_81396 [Trichoderma harzianum CBS 226.95])	GO:0006426(biological_process:glycyl-tRNA aminoacylation); GO:0005737(cellular_component:cytoplasm); GO:0004820(molecular_function:glycine-tRNA ligase activity); GO:0005524(molecular_function:ATP binding)	K01880	GARS, glyS1	map00970(Aminoacyl-tRNA biosynthesis)	COG0423(J:Translation, ribosomal structure and biogenesis)	COG0423(Catalyzes the attachment of glycine to tRNA(Gly) (By similarity))	PF03129.17(HGTP_anticodon:Anticodon binding domain); PF00587.22(tRNA-synt_2b:tRNA synthetase class II core domain (G, H, P, S and T))	sp|Q10179|SYG_SCHPO(Putative glycine--tRNA ligase OS=Schizosaccharomyces pombe (strain 972 / ATCC 24843) OX=284812 GN=grs1 PE=3 SV=1)
21022	hypothetical protein	2556	0	6.17	555.63	9.11798	9.21e-08	8.15e-06	yes	up	XP_024768525.1(hypothetical protein M431DRAFT_21022 [Trichoderma harzianum CBS 226.95])					ENOG410ZU00(S:Function unknown); ENOG41117AN(S:Function unknown)	ENOG410ZU00(Heterokaryon incompatibility protein (HET)); ENOG41117AN(Heterokaryon incompatibility protein (HET))	PF06985.8(HET:Heterokaryon incompatibility protein (HET))
74460	hypothetical protein	747	16.305	499.6	20.6171	4.36577	9.02e-08	8.06e-06	yes	up	XP_024778534.1(hypothetical protein M431DRAFT_74460 [Trichoderma harzianum CBS 226.95])	GO:0006096(biological_process:glycolytic process); GO:0006098(biological_process:pentose-phosphate shunt); GO:0004807(molecular_function:triose-phosphate isomerase activity); GO:0006094(biological_process:gluconeogenesis)	K01803	TPI, tpiA	map00010(Glycolysis / Gluconeogenesis); map00051(Fructose and mannose metabolism); map00562(Inositol phosphate metabolism)	COG0149(G:Carbohydrate transport and metabolism)	COG0149(triosephosphate isomerase)	PF00121.15(TIM:Triosephosphate isomerase)	sp|Q7S2Z9|TPIS_NEUCR(Triosephosphate isomerase OS=Neurospora crassa (strain ATCC 24698 / 74-OR23-1A / CBS 708.71 / DSM 1257 / FGSC 987) OX=367110 GN=tpi-1 PE=3 SV=1)
492122	hypothetical protein	552	1.405	84.495	42.0865	5.39529	2.33e-08	2.43e-06	yes	up	XP_024777562.1(hypothetical protein M431DRAFT_492122 [Trichoderma harzianum CBS 226.95])
479191	class II peroxidase	1065	9.425	326.705	22.4428	4.48818	1.98e-08	2.15e-06	yes	up	XP_024777289.1(class II peroxidase [Trichoderma harzianum CBS 226.95])	GO:0020037(molecular_function:heme binding); GO:0004130(molecular_function:cytochrome-c peroxidase activity); GO:0016021(cellular_component:integral component of membrane); GO:0006979(biological_process:response to oxidative stress); GO:0098869(biological_process:cellular oxidant detoxification); GO:0005758(cellular_component:mitochondrial intermembrane space); GO:0034599(biological_process:cellu…	K00428	E1.11.1.5		COG0376(P:Inorganic ion transport and metabolism)	COG0376(Bifunctional enzyme with both catalase and broad- spectrum peroxidase activity (By similarity))	PF00141.20(peroxidase:Peroxidase)	sp|Q4ING3|CCPR_GIBZE(Cytochrome c peroxidase, mitochondrial OS=Gibberella zeae (strain PH-1 / ATCC MYA-4620 / FGSC 9075 / NRRL 31084) OX=229533 GN=CCP1 PE=3 SV=1)
478693	hypothetical protein	1065	1.735	67.955	27.6538	4.78941	6.8e-09	8.47e-07	yes	up	XP_024779324.1(hypothetical protein M431DRAFT_478693 [Trichoderma harzianum CBS 226.95])	GO:0031683(molecular_function:G-protein beta/gamma-subunit complex binding); GO:0005834(cellular_component:heterotrimeric G-protein complex); GO:0003924(molecular_function:GTPase activity); GO:0004871(molecular_function:signal transducer activity); GO:0001664(molecular_function:G-protein coupled receptor binding); GO:0007186(biological_process:G-protein coupled receptor signaling pathway); GO:000…	K04640	GNA		ENOG410XNVQ(K:Transcription)	ENOG410XNVQ(Sexual development transcription factor NsdD)	PF00503.17(G-alpha:G-protein alpha subunit); PF00025.18(Arf:ADP-ribosylation factor family); PF04670.9(Gtr1_RagA:Gtr1/RagA G protein conserved region)	sp|Q05424|GPA2_NEUCR(Guanine nucleotide-binding protein alpha-2 subunit OS=Neurospora crassa (strain ATCC 24698 / 74-OR23-1A / CBS 708.71 / DSM 1257 / FGSC 987) OX=367110 GN=gna-2 PE=2 SV=1)
471587	hypothetical protein	1003	0	29.695	839.666	9.71367	6.49e-09	8.27e-07	yes	up	XP_024772447.1(hypothetical protein M431DRAFT_471587 [Trichoderma harzianum CBS 226.95])
524566	hypothetical protein	1169	0	28.705	997.533	9.96222	2.23e-09	3.2e-07	yes	up	XP_024769042.1(hypothetical protein M431DRAFT_524566 [Trichoderma harzianum CBS 226.95])	GO:0008652(biological_process:cellular amino acid biosynthetic process); GO:0009081(biological_process:branched-chain amino acid metabolic process); GO:0004084(molecular_function:branched-chain-amino-acid transaminase activity)	K00826	E2.6.1.42, ilvE	map00270(Cysteine and methionine metabolism); map00280(Valine, leucine and isoleucine degradation); map00290(Valine, leucine and isoleucine biosynthesis); map00770(Pantothenate and CoA biosynthesis)	COG0115(S:Function unknown)	COG0115(Protein of unknown function (DUF1330))	PF01063.16(Aminotran_4:Amino-transferase class IV)	sp|P47176|BCA2_YEAST(Branched-chain-amino-acid aminotransferase, cytosolic OS=Saccharomyces cerevisiae (strain ATCC 204508 / S288c) OX=559292 GN=BAT2 PE=1 SV=1)
86714	hypothetical protein	987	4.12	223.29	36.4486	5.18779	2.25e-09	3.2e-07	yes	up	XP_024773876.1(hypothetical protein M431DRAFT_86714 [Trichoderma harzianum CBS 226.95])	GO:1903352(biological_process:L-ornithine transmembrane transport); GO:0000064(molecular_function:L-ornithine transmembrane transporter activity); GO:0016021(cellular_component:integral component of membrane); GO:0006810(biological_process:transport); GO:0006526(biological_process:arginine biosynthetic process); GO:0005740(cellular_component:mitochondrial envelope); GO:0000066(biological_process:…	K15114	ORT1		ENOG410XNVH(S:Function unknown)	ENOG410XNVH(Solute carrier family 25 (Mitochondrial carrier)	PF00153.24(Mito_carr:Mitochondrial carrier protein)	sp|Q01356|ARG13_NEUCR(Amino-acid transporter arg-13 OS=Neurospora crassa (strain ATCC 24698 / 74-OR23-1A / CBS 708.71 / DSM 1257 / FGSC 987) OX=367110 GN=arg-13 PE=2 SV=1)
496408	hypothetical protein	1437	0.73	52.195	46.2203	5.53045	7.53e-10	1.28e-07	yes	up	XP_024772759.1(hypothetical protein M431DRAFT_496408 [Trichoderma harzianum CBS 226.95])	GO:0016021(cellular_component:integral component of membrane); GO:0055085(biological_process:transmembrane transport)	K00135	gabD	map00250(Alanine, aspartate and glutamate metabolism); map00310(Lysine degradation); map00350(Tyrosine metabolism); map00650(Butanoate metabolism)	ENOG410YF5V(U:Intracellular trafficking, secretion, and vesicular transport); COG0477(U:Intracellular trafficking, secretion, and vesicular transport)	ENOG410YF5V(MFS multidrug transporter); COG0477(MFS multidrug transporter)	PF07690.13(MFS_1:Major Facilitator Superfamily); PF10953.5(DUF2754:Protein of unknown function (DUF2754))	sp|A0A0E4AZP4|FSA7_FUSSF(MFS transporter fsa7 OS=Fusarium sp. (strain FN080326) OX=1608308 GN=fsa7 PE=3 SV=1)
183965	hypothetical protein	1546	0	33.72	1691.81	10.7244	9.06e-11	2.01e-08	yes	up	XP_024780175.1(hypothetical protein M431DRAFT_183965 [Trichoderma harzianum CBS 226.95])	GO:0016787(molecular_function:hydrolase activity); GO:0016021(cellular_component:integral component of membrane); GO:0016020(cellular_component:membrane); GO:0008152(biological_process:metabolic process)				COG0657(I:Lipid transport and metabolism); ENOG4111VHJ(I:Lipid transport and metabolism); ENOG410XQSP(I:Lipid transport and metabolism)	COG0657(alpha beta hydrolase fold-3 domain protein); ENOG4111VHJ(Protein of unknown function (DUF2424)); ENOG410XQSP(Alpha beta hydrolase fold protein)	PF07859.10(Abhydrolase_3:alpha/beta hydrolase fold); PF10340.6(DUF2424:Protein of unknown function (DUF2424))	sp|Q5UQ83|YR526_MIMIV(Putative alpha/beta hydrolase R526 OS=Acanthamoeba polyphaga mimivirus OX=212035 GN=MIMI_R526 PE=1 SV=1)
3629	hypothetical protein	2217	0.075	21.935	205.896	7.68577	8.32e-11	1.9e-08	yes	up	XP_024776140.1(hypothetical protein M431DRAFT_3629 [Trichoderma harzianum CBS 226.95])					ENOG41117W4(S:Function unknown); ENOG4111K6N(S:Function unknown); ENOG410YNAD(S:Function unknown)	ENOG41117W4(-); ENOG4111K6N(-); ENOG410YNAD(-)	PF07200.10(Mod_r:Modifier of rudimentary (Mod(r)) protein)
305005	hypothetical protein	1248	0.095	27.83	190.949	7.57704	4.79e-11	1.19e-08	yes	up	OPB39344.1(hypothetical protein A0O28_0050500 [Trichoderma guizhouense])					ENOG410YVYY(S:Function unknown); ENOG410YBTC(S:Function unknown); ENOG410YYAB(S:Function unknown); ENOG4111BTQ(S:Function unknown); ENOG4110EJC(S:Function unknown); ENOG4111HKT(S:Function unknown); ENOG410YYI5(S:Function unknown)	ENOG410YVYY(-); ENOG410YBTC(-); ENOG410YYAB(-); ENOG4111BTQ(-); ENOG4110EJC(-); ENOG4111HKT(-); ENOG410YYI5(-)	PF01544.15(CorA:CorA-like Mg2+ transporter protein)
478895	hypothetical protein	1791	1.305	126.26	59.9596	5.90592	1.29e-11	3.71e-09	yes	up	XP_024776941.1(hypothetical protein M431DRAFT_478895 [Trichoderma harzianum CBS 226.95])	GO:0042938(biological_process:dipeptide transport); GO:0042939(biological_process:tripeptide transport); GO:0071916(molecular_function:dipeptide transmembrane transporter activity); GO:0000324(cellular_component:fungal-type vacuole); GO:0031520(cellular_component:plasma membrane of cell tip); GO:0016021(cellular_component:integral component of membrane); GO:0042936(molecular_function:dipeptide tr…	K03305	TC.POT		COG3104(E:Amino acid transport and metabolism)	COG3104(transporter)	PF00854.18(PTR2:POT family)	sp|P32901|PTR2_YEAST(Peptide transporter PTR2 OS=Saccharomyces cerevisiae (strain ATCC 204508 / S288c) OX=559292 GN=PTR2 PE=1 SV=2)
502634	hypothetical protein	1593	13.43	919.815	45.2531	5.49995	2.88e-15	2.08e-12	yes	up	XP_024780176.1(hypothetical protein M431DRAFT_502634 [Trichoderma harzianum CBS 226.95])	GO:0006508(biological_process:proteolysis); GO:0004190(molecular_function:aspartic-type endopeptidase activity)				ENOG410XNV7(I:Lipid transport and metabolism)	ENOG410XNV7(Alpha beta hydrolase fold protein)	PF00026.20(Asp:Eukaryotic aspartyl protease); PF14543.3(TAXi_N:Xylanase inhibitor N-terminal)	sp|C4YMJ3|CARP2_CANAW(Candidapepsin-2 OS=Candida albicans (strain WO-1) OX=294748 GN=SAP2 PE=1 SV=1)
71042	hypothetical protein	1083	0.235	238.11	689.925	9.43029	1.84e-18	3.99e-15	yes	up	XP_024780174.1(hypothetical protein M431DRAFT_71042 [Trichoderma harzianum CBS 226.95])	GO:0016021(cellular_component:integral component of membrane); GO:0055114(biological_process:oxidation-reduction process); GO:0016491(molecular_function:oxidoreductase activity)				COG1028(G:Carbohydrate transport and metabolism); COG0300(G:Carbohydrate transport and metabolism)	COG1028(phosphate transporter); COG0300(phosphate transporter)	PF00106.22(adh_short:short chain dehydrogenase); PF13561.3(adh_short_C2:Enoyl-(Acyl carrier protein) reductase); PF08659.7(KR:KR domain)	sp|N4WE43|RED2_COCH4(Dehydrogenase RED2 OS=Cochliobolus heterostrophus (strain C4 / ATCC 48331 / race T) OX=665024 GN=RED2 PE=3 SV=1)
485768	hypothetical protein	1176	8.41	1.69	0.129886	-2.94468	0.00670089	0.0499856	yes	down	XP_024770047.1(hypothetical protein M431DRAFT_485768 [Trichoderma harzianum CBS 226.95])	GO:0016021(cellular_component:integral component of membrane)				ENOG410YIPV(S:Function unknown); ENOG4111BQH(S:Function unknown); ENOG4110X0R(S:Function unknown); ENOG41118YQ(S:Function unknown)	ENOG410YIPV(-); ENOG4111BQH(-); ENOG4110X0R(-); ENOG41118YQ(-)
97673	hypothetical protein	1098	2.5	0.315	0.0831457	-3.58821	0.00666721	0.0498202	yes	down	XP_024769055.1(hypothetical protein M431DRAFT_97673 [Trichoderma harzianum CBS 226.95])					COG2706(G:Carbohydrate transport and metabolism)	COG2706(6-phosphogluconolactonase)	PF10282.6(Lactonase:Lactonase, 7-bladed beta-propeller)	sp|D4B0N9|6PGL_ARTBC(Probable 6-phosphogluconolactonase ARB_02015 OS=Arthroderma benhamiae (strain ATCC MYA-4681 / CBS 112371) OX=663331 GN=ARB_02015 PE=1 SV=1)
76763	hypothetical protein	396	33.94	6.18	0.137903	-2.85827	0.00664276	0.0496803	yes	down	XP_024779265.1(hypothetical protein M431DRAFT_76763 [Trichoderma harzianum CBS 226.95])					ENOG4110W81(S:Function unknown)	ENOG4110W81(-)
105629	hypothetical protein	1740	0.935	0.025	0.018375	-5.76611	0.00663892	0.0496803	yes	down	XP_024778128.1(hypothetical protein M431DRAFT_105629 [Trichoderma harzianum CBS 226.95])	GO:0016020(cellular_component:membrane); GO:0046872(molecular_function:metal ion binding); GO:0016491(molecular_function:oxidoreductase activity)				COG2124(Q:Secondary metabolites biosynthesis, transport and catabolism)	COG2124(Gentisate 1,2-dioxygenase)	PF00067.19(p450:Cytochrome P450)	sp|B8NYW9|FLUA_ASPFN(Cytochrome P450 monooxygenase AFLA_114810 OS=Aspergillus flavus (strain ATCC 200026 / FGSC A1120 / NRRL 3357 / JCM 12722 / SRRC 167) OX=332952 GN=AFLA_114810 PE=3 SV=1)
7265	hypothetical protein	999	45.89	14.22	0.207984	-2.26546	0.00656655	0.0492804	yes	down	XP_024772437.1(hypothetical protein M431DRAFT_7265 [Trichoderma harzianum CBS 226.95])	GO:0015230(molecular_function:FAD transmembrane transporter activity); GO:0016021(cellular_component:integral component of membrane); GO:0006810(biological_process:transport); GO:0005739(cellular_component:mitochondrion); GO:0035350(biological_process:FAD transmembrane transport); GO:0055085(biological_process:transmembrane transport)	K15115	SLC25A32, MFT		ENOG410XPAJ(O:Posttranslational modification, protein turnover, chaperones)	ENOG410XPAJ(tRNA thio-modification)	PF00153.24(Mito_carr:Mitochondrial carrier protein)	sp|P40464|FLX1_YEAST(Mitochondrial FAD carrier protein FLX1 OS=Saccharomyces cerevisiae (strain ATCC 204508 / S288c) OX=559292 GN=FLX1 PE=3 SV=1)
520260	hypothetical protein	714	4.075	0.325	0.0504641	-4.3086	0.00656321	0.0492804	yes	down	XP_024774651.1(hypothetical protein M431DRAFT_520260 [Trichoderma harzianum CBS 226.95])	GO:0008080(molecular_function:N-acetyltransferase activity)				ENOG41116H4(S:Function unknown); ENOG410Y2IZ(S:Function unknown); ENOG41116NK(S:Function unknown); ENOG4112000(S:Function unknown)	ENOG41116H4(-); ENOG410Y2IZ(-); ENOG41116NK(-); ENOG4112000(-)	PF13302.4(Acetyltransf_3:Acetyltransferase (GNAT) domain)
101981	carbohydrate-binding module family 1 protein	1188	2.22	0.165	0.045371	-4.46209	0.00656245	0.0492804	yes	down	XP_024767241.1(carbohydrate-binding module family 1 protein [Trichoderma harzianum CBS 226.95])	GO:0016787(molecular_function:hydrolase activity); GO:0030248(molecular_function:cellulose binding); GO:0005576(cellular_component:extracellular region); GO:0005975(biological_process:carbohydrate metabolic process); GO:0004553(molecular_function:hydrolase activity, hydrolyzing O-glycosyl compounds)	K01183	E3.2.1.14	map00520(Amino sugar and nucleotide sugar metabolism)	ENOG4111GPA(G:Carbohydrate transport and metabolism)	ENOG4111GPA(chitinase)	PF00704.25(Glyco_hydro_18:Glycosyl hydrolases family 18); PF00734.15(CBM_1:Fungal cellulose binding domain)	sp|Q12713|CHI33_TRIHA(Endochitinase 33 OS=Trichoderma harzianum OX=5544 GN=chit33 PE=1 SV=1)
13053	hypothetical protein	1253	1.495	0.035	0.0160589	-5.96048	0.00655534	0.0492804	yes	down	XP_024778177.1(hypothetical protein M431DRAFT_13053 [Trichoderma harzianum CBS 226.95])	GO:0050662(molecular_function:coenzyme binding); GO:0003824(molecular_function:catalytic activity)				COG0451(S:Function unknown)	COG0451(C6 finger domain protein)	PF01370.18(Epimerase:NAD dependent epimerase/dehydratase family); PF16363.2(GDP_Man_Dehyd:GDP-mannose 4,6 dehydratase); PF07993.9(NAD_binding_4:Male sterility protein); PF04321.14(RmlD_sub_bind:RmlD substrate binding domain); PF01073.16(3Beta_HSD:3-beta hydroxysteroid dehydrogenase/isomerase family); PF13460.3(NAD_binding_10:NAD(P)H-binding)	sp|Q9UT59|YKJ7_SCHPO(Putative uncharacterized oxidoreductase C513.07 OS=Schizosaccharomyces pombe (strain 972 / ATCC 24843) OX=284812 GN=SPAC513.07 PE=3 SV=1)
228055	glycosyltransferase family 20 protein	1652	1.12	0.08	0.0495945	-4.33368	0.00649301	0.0489403	yes	down	PKK53292.1(hypothetical protein CI102_3548 [Trichoderma harzianum])		K16055	TPS	map00500(Starch and sucrose metabolism)	COG0380(S:Function unknown)	COG0380(conserved hypothetical protein)	PF00982.18(Glyco_transf_20:Glycosyltransferase family 20)	sp|P78875|TPP1_SCHPO(Trehalose-phosphatase OS=Schizosaccharomyces pombe (strain 972 / ATCC 24843) OX=284812 GN=tpp1 PE=1 SV=2)
87546	hypothetical protein	1281	387.6	101.98	0.181765	-2.45985	0.00646802	0.048832	yes	down	XP_024773545.1(hypothetical protein M431DRAFT_87546 [Trichoderma harzianum CBS 226.95])	GO:0004367(molecular_function:glycerol-3-phosphate dehydrogenase [NAD+] activity); GO:0005975(biological_process:carbohydrate metabolic process); GO:0009331(cellular_component:glycerol-3-phosphate dehydrogenase complex); GO:0046168(biological_process:glycerol-3-phosphate catabolic process); GO:0051287(molecular_function:NAD binding); GO:0055114(biological_process:oxidation-reduction process)	K00006	GPD1	map00564(Glycerophospholipid metabolism); map04011(MAPK signaling pathway - yeast)	COG0240(C:Energy production and conversion)	COG0240(glycerol-3-phosphate dehydrogenase)	PF01210.20(NAD_Gly3P_dh_N:NAD-dependent glycerol-3-phosphate dehydrogenase N-terminus); PF07479.11(NAD_Gly3P_dh_C:NAD-dependent glycerol-3-phosphate dehydrogenase C-terminus)	sp|Q6UGN0|GPD_HYPAT(Glycerol-3-phosphate dehydrogenase [NAD(+)] OS=Hypocrea atroviridis OX=63577 GN=gld1 PE=3 SV=1)
508047	hypothetical protein	1273	744.935	165.46	0.148409	-2.75235	0.00647301	0.048832	yes	down	XP_024774307.1(hypothetical protein M431DRAFT_508047 [Trichoderma harzianum CBS 226.95])					ENOG410YBNZ(S:Function unknown)	ENOG410YBNZ(Slowmo homolog)	PF04707.11(PRELI:PRELI-like family)	sp|P35200|UPS2_YEAST(Protein UPS2, mitochondrial OS=Saccharomyces cerevisiae (strain ATCC 204508 / S288c) OX=559292 GN=UPS2 PE=1 SV=1)
78309	hypothetical protein	1731	50.945	19.02	0.245858	-2.0241	0.00621672	0.0472159	yes	down	XP_024777376.1(hypothetical protein M431DRAFT_78309 [Trichoderma harzianum CBS 226.95])	GO:0005215(molecular_function:transporter activity); GO:0016021(cellular_component:integral component of membrane); GO:0055085(biological_process:transmembrane transport)				ENOG4110RCS(G:Carbohydrate transport and metabolism); ENOG410XSE0(G:Carbohydrate transport and metabolism)	ENOG4110RCS(MFS multidrug transporter); ENOG410XSE0(MFS multidrug transporter)	PF07690.13(MFS_1:Major Facilitator Superfamily)	sp|P25351|YCR3_YEAST(Uncharacterized membrane protein YCR023C OS=Saccharomyces cerevisiae (strain ATCC 204508 / S288c) OX=559292 GN=YCR023C PE=1 SV=2)
493763	hypothetical protein	1812	61.145	25.615	0.240408	-2.05644	0.00622064	0.0472159	yes	down	XP_024774998.1(hypothetical protein M431DRAFT_493763 [Trichoderma harzianum CBS 226.95])	GO:0004674(molecular_function:protein serine/threonine kinase activity); GO:0006468(biological_process:protein phosphorylation); GO:0005524(molecular_function:ATP binding)				ENOG410XRMJ(S:Function unknown)	ENOG410XRMJ(-)	PF00069.22(Pkinase:Protein kinase domain); PF07714.14(Pkinase_Tyr:Protein tyrosine kinase)	sp|O94547|SRK1_SCHPO(Serine/threonine-protein kinase srk1 OS=Schizosaccharomyces pombe (strain 972 / ATCC 24843) OX=284812 GN=srk1 PE=1 SV=1)
513516	hypothetical protein	1995	1.4	0.085	0.035993	-4.79614	0.00617993	0.0469891	yes	down	XP_024768440.1(hypothetical protein M431DRAFT_513516 [Trichoderma harzianum CBS 226.95])					ENOG4111BEZ(S:Function unknown); ENOG410YFXB(S:Function unknown); ENOG4111W0C(S:Function unknown); ENOG410YKJC(S:Function unknown)	ENOG4111BEZ(Fungal Zn(2)-Cys(6) binuclear cluster domain); ENOG410YFXB(-); ENOG4111W0C(-); ENOG410YKJC(-)	PF00172.15(Zn_clus:Fungal Zn(2)-Cys(6) binuclear cluster domain)	sp|Q9UT46|MOC3_SCHPO(Transcriptional regulatory protein moc3 OS=Schizosaccharomyces pombe (strain 972 / ATCC 24843) OX=284812 GN=moc3 PE=1 SV=4)
502689	hypothetical protein	2311	77.43	19.485	0.174708	-2.51698	0.00616743	0.0469353	yes	down	XP_024780231.1(hypothetical protein M431DRAFT_502689 [Trichoderma harzianum CBS 226.95])	GO:0022891(molecular_function:substrate-specific transmembrane transporter activity); GO:0016021(cellular_component:integral component of membrane); GO:0055085(biological_process:transmembrane transport)				ENOG410XNQK(S:Function unknown)	ENOG410XNQK(Dehydrogenase reductase)	PF00083.21(Sugar_tr:Sugar (and other) transporter); PF07690.13(MFS_1:Major Facilitator Superfamily)	sp|P07921|LACP_KLULA(Lactose permease OS=Kluyveromyces lactis (strain ATCC 8585 / CBS 2359 / DSM 70799 / NBRC 1267 / NRRL Y-1140 / WM37) OX=284590 GN=LAC12 PE=3 SV=1)
343443	hypothetical protein	915	1.395	0	0.00996598	-6.64877	0.00614859	0.0468742	yes	down	XP_024777208.1(hypothetical protein M431DRAFT_343443 [Trichoderma harzianum CBS 226.95])
383562	hypothetical protein	1247	0.86	0	0.0108822	-6.52189	0.00611761	0.0466791	yes	down	XP_024776320.1(hypothetical protein M431DRAFT_383562 [Trichoderma harzianum CBS 226.95])
110630	hypothetical protein	1221	7.105	2	0.184924	-2.435	0.00610971	0.0466599	yes	down	XP_024777977.1(hypothetical protein M431DRAFT_110630 [Trichoderma harzianum CBS 226.95])	GO:0055114(biological_process:oxidation-reduction process); GO:0016491(molecular_function:oxidoreductase activity)	K03885	ndh	map00190(Oxidative phosphorylation)	COG1252(K:Transcription)	COG1252(Transcription factor)	PF07992.11(Pyr_redox_2:Pyridine nucleotide-disulphide oxidoreductase); PF00070.24(Pyr_redox:Pyridine nucleotide-disulphide oxidoreductase)	sp|P9WJJ1|Y1812_MYCTU(NADH dehydrogenase-like protein Rv1812c OS=Mycobacterium tuberculosis (strain ATCC 25618 / H37Rv) OX=83332 GN=Rv1812c PE=1 SV=1)
145858	hypothetical protein	2335	0.405	0	0.0107273	-6.54257	0.00608436	0.0465072	yes	down	XP_024772732.1(hypothetical protein M431DRAFT_145858 [Trichoderma harzianum CBS 226.95])	GO:0009987(biological_process:cellular process); GO:0012505(cellular_component:endomembrane system); GO:0043231(cellular_component:intracellular membrane-bounded organelle)	K03283	HSPA1s	map03040(Spliceosome); map04141(Protein processing in endoplasmic reticulum); map04144(Endocytosis); map04213(Longevity regulating pathway - multiple species)	COG0443(O:Posttranslational modification, protein turnover, chaperones)	COG0443(Heat shock protein)	PF00012.17(HSP70:Hsp70 protein); PF06723.10(MreB_Mbl:MreB/Mbl protein)	sp|P78695|BIP_NEUCR(Endoplasmic reticulum chaperone BiP OS=Neurospora crassa (strain ATCC 24698 / 74-OR23-1A / CBS 708.71 / DSM 1257 / FGSC 987) OX=367110 GN=grp78 PE=3 SV=3)
508790	hypothetical protein	3324	1.77	0.445	0.163734	-2.61057	0.00607868	0.0465048	yes	down	XP_024773381.1(hypothetical protein M431DRAFT_508790 [Trichoderma harzianum CBS 226.95])	GO:0003677(molecular_function:DNA binding)	K10838	XPC	map03420(Nucleotide excision repair)	COG5535(S:Function unknown)	COG5535(Uncharacterized conserved protein (DUF2036))	PF03835.12(Rad4:Rad4 transglutaminase-like domain); PF10405.6(BHD_3:Rad4 beta-hairpin domain 3); PF10403.6(BHD_1:Rad4 beta-hairpin domain 1); PF10404.6(BHD_2:Rad4 beta-hairpin domain 2); PF01841.16(Transglut_core:Transglutaminase-like superfamily)	sp|P87235|RHP42_SCHPO(DNA repair protein rhp42 OS=Schizosaccharomyces pombe (strain 972 / ATCC 24843) OX=284812 GN=rhp42 PE=3 SV=1)
510386	hypothetical protein	1653	1.295	0.11	0.0520676	-4.26347	0.00605412	0.0463579	yes	down	XP_024771874.1(hypothetical protein M431DRAFT_510386 [Trichoderma harzianum CBS 226.95])					ENOG410YWSU(S:Function unknown); ENOG410YZBX(S:Function unknown); ENOG410ZY41(S:Function unknown)	ENOG410YWSU(-); ENOG410YZBX(-); ENOG410ZY41(-)
287046	hypothetical protein	1122	5.96	1.48	0.163376	-2.61373	0.00600344	0.0460105	yes	down	XP_024778485.1(hypothetical protein M431DRAFT_287046 [Trichoderma harzianum CBS 226.95])
90959	hypothetical protein	1875	4.04	0.76	0.11818	-3.08095	0.00593116	0.0455774	yes	down	XP_024772099.1(hypothetical protein M431DRAFT_90959 [Trichoderma harzianum CBS 226.95])	GO:0003824(molecular_function:catalytic activity); GO:0008152(biological_process:metabolic process)				COG0318(H:Coenzyme transport and metabolism)	COG0318(nicotinate-nucleotide diphosphorylase (carboxylating) activity)	PF00501.25(AMP-binding:AMP-binding enzyme); PF13193.3(AMP-binding_C:AMP-binding enzyme C-terminal domain)	sp|O31826|YNGI_BACSU(Putative acyl-CoA synthetase YngI OS=Bacillus subtilis (strain 168) OX=224308 GN=yngI PE=3 SV=1)
98620	hypothetical protein	1749	4.895	1.345	0.18448	-2.43847	0.00589085	0.0453078	yes	down	XP_024768684.1(hypothetical protein M431DRAFT_98620 [Trichoderma harzianum CBS 226.95])	GO:0003824(molecular_function:catalytic activity); GO:0000287(molecular_function:magnesium ion binding); GO:0030976(molecular_function:thiamine pyrophosphate binding)				COG0028(S:Function unknown)	COG0028(ngg1p interacting factor 3 protein, nif3)	PF02776.15(TPP_enzyme_N:Thiamine pyrophosphate enzyme, N-terminal TPP binding domain); PF02775.18(TPP_enzyme_C:Thiamine pyrophosphate enzyme, C-terminal TPP binding domain); PF00205.19(TPP_enzyme_M:Thiamine pyrophosphate enzyme, central domain)	sp|P20906|MDLC_PSEPU(Benzoylformate decarboxylase OS=Pseudomonas putida OX=303 GN=mdlC PE=1 SV=2)
120441	hypothetical protein	1569	8.645	1.645	0.123557	-3.01675	0.00583259	0.0449395	yes	down	XP_024771700.1(hypothetical protein M431DRAFT_120441 [Trichoderma harzianum CBS 226.95])	GO:0016021(cellular_component:integral component of membrane); GO:0055114(biological_process:oxidation-reduction process); GO:0071949(molecular_function:FAD binding); GO:0016491(molecular_function:oxidoreductase activity)	K00480	E1.14.13.1		COG0654(S:Function unknown)	COG0654(integral membrane protein)	PF01494.16(FAD_binding_3:FAD binding domain); PF01266.21(DAO:FAD dependent oxidoreductase); PF13450.3(NAD_binding_8:NAD(P)-binding Rossmann-like domain); PF13454.3(NAD_binding_9:FAD-NAD(P)-binding); PF07992.11(Pyr_redox_2:Pyridine nucleotide-disulphide oxidoreductase)	sp|P23262|NHG1_PSEPU(Salicylate hydroxylase OS=Pseudomonas putida OX=303 GN=nahG PE=1 SV=4)
511747	hypothetical protein	3370	9.445	3.065	0.212849	-2.2321	0.00578493	0.0446119	yes	down	XP_024770518.1(hypothetical protein M431DRAFT_511747 [Trichoderma harzianum CBS 226.95])	GO:0016567(biological_process:protein ubiquitination); GO:0004842(molecular_function:ubiquitin-protein transferase activity); GO:0008270(molecular_function:zinc ion binding)				ENOG410Z0V4(S:Function unknown); ENOG4110UUF(S:Function unknown)	ENOG410Z0V4(-); ENOG4110UUF(-)	PF01485.18(IBR:IBR domain, a half RING-finger domain)	sp|Q5UQ35|YR811_MIMIV(Putative ariadne-like RING finger protein R811 OS=Acanthamoeba polyphaga mimivirus OX=212035 GN=MIMI_R811 PE=4 SV=1)
515054	multicopper oxidase	1764	0.97	0.05	0.0315689	-4.98535	0.00571616	0.0441995	yes	down	PKK41658.1(hypothetical protein CI102_14567 [Trichoderma harzianum])	GO:0046872(molecular_function:metal ion binding); GO:0005507(molecular_function:copper ion binding); GO:0055114(biological_process:oxidation-reduction process); GO:0016491(molecular_function:oxidoreductase activity)	K00423	E1.10.3.3	map00053(Ascorbate and aldarate metabolism)	COG2132(S:Function unknown)	COG2132(C6 transcription factor)	PF00394.19(Cu-oxidase:Multicopper oxidase); PF07731.11(Cu-oxidase_2:Multicopper oxidase); PF07732.12(Cu-oxidase_3:Multicopper oxidase)	sp|I1RF64|AURL2_GIBZE(Multicopper oxidase aurL2 OS=Gibberella zeae (strain PH-1 / ATCC MYA-4620 / FGSC 9075 / NRRL 31084) OX=229533 GN=aurL2 PE=2 SV=1)
69411	hypothetical protein	738	5.875	0.73	0.0842224	-3.56965	0.00570184	0.0441282	yes	down	XP_024778993.1(hypothetical protein M431DRAFT_69411, partial [Trichoderma harzianum CBS 226.95])					ENOG4110X0B(S:Function unknown)	ENOG4110X0B(-)	PF00856.25(SET:SET domain)
118643	carbohydrate esterase family 5 protein	994	2.345	0.15	0.039656	-4.65632	0.00569423	0.0441087	yes	down	XP_024772780.1(carbohydrate esterase family 5 protein [Trichoderma harzianum CBS 226.95])	GO:0016787(molecular_function:hydrolase activity); GO:0030248(molecular_function:cellulose binding); GO:0005975(biological_process:carbohydrate metabolic process); GO:0005576(cellular_component:extracellular region); GO:0008152(biological_process:metabolic process); GO:0004553(molecular_function:hydrolase activity, hydrolyzing O-glycosyl compounds)	K05972	AXE1		ENOG4111V6F(S:Function unknown); ENOG410Y7BW(S:Function unknown); ENOG411139A(U:Intracellular trafficking, secretion, and vesicular transport)	ENOG4111V6F(Zinc finger protein); ENOG410Y7BW(Zinc finger protein); ENOG411139A(carbohydrate esterase family 5 protein)	PF01083.19(Cutinase:Cutinase); PF08237.8(PE-PPE:PE-PPE domain)	sp|Q99034|AXE1_HYPJE(Acetylxylan esterase OS=Hypocrea jecorina OX=51453 GN=axe1 PE=1 SV=1)
487545	glycoside hydrolase family 3 protein	2304	17.535	5.355	0.204658	-2.28871	0.00561996	0.0436504	yes	down	XP_024768231.1(glycoside hydrolase family 3 protein [Trichoderma harzianum CBS 226.95])	GO:0005975(biological_process:carbohydrate metabolic process); GO:0004553(molecular_function:hydrolase activity, hydrolyzing O-glycosyl compounds)	K05349	bglX	map00460(Cyanoamino acid metabolism); map00500(Starch and sucrose metabolism)	COG1472(S:Function unknown)	COG1472(-)	PF01915.19(Glyco_hydro_3_C:Glycosyl hydrolase family 3 C-terminal domain); PF00933.18(Glyco_hydro_3:Glycosyl hydrolase family 3 N terminal domain); PF14310.3(Fn3-like:Fibronectin type III-like domain)	sp|G4N7Z0|CEL3B_MAGO7(Beta-glucosidase cel3A OS=Magnaporthe oryzae (strain 70-15 / ATCC MYA-4617 / FGSC 8958) OX=242507 GN=cel3B PE=1 SV=1)
530439	hypothetical protein	1786	5.645	1.21	0.139764	-2.83894	0.00557216	0.0434133	yes	down	XP_024775650.1(hypothetical protein M431DRAFT_530439 [Trichoderma harzianum CBS 226.95])	GO:0050662(molecular_function:coenzyme binding); GO:0050661(molecular_function:NADP binding); GO:0050660(molecular_function:flavin adenine dinucleotide binding); GO:0004499(molecular_function:N,N-dimethylaniline monooxygenase activity); GO:0000166(molecular_function:nucleotide binding); GO:0055114(biological_process:oxidation-reduction process); GO:0016491(molecular_function:oxidoreductase activi…	K00485	FMO		COG2072(S:Function unknown)	COG2072(Conserved hypothetical, protein)	PF00743.16(FMO-like:Flavin-binding monooxygenase-like); PF13738.3(Pyr_redox_3:Pyridine nucleotide-disulphide oxidoreductase); PF07992.11(Pyr_redox_2:Pyridine nucleotide-disulphide oxidoreductase); PF13454.3(NAD_binding_9:FAD-NAD(P)-binding); PF13434.3(K_oxygenase:L-lysine 6-monooxygenase (NADPH-requiring)); PF03446.12(NAD_binding_2:NAD binding domain of 6-phosphogluconate dehydrogenase)	sp|I1RF61|AURF_GIBZE(Monooxygenase aurF OS=Gibberella zeae (strain PH-1 / ATCC MYA-4620 / FGSC 9075 / NRRL 31084) OX=229533 GN=aurF PE=1 SV=1)
41615	hypothetical protein	558	3.13	0	0.0100112	-6.64224	0.00557441	0.0434133	yes	down	PKK45684.1(hypothetical protein CI102_9220 [Trichoderma harzianum])					ENOG4110W7Q(S:Function unknown)	ENOG4110W7Q(-)
79390	hypothetical protein	7557	3.21	1.115	0.225945	-2.14596	0.00554942	0.0433045	yes	down	XP_024777857.1(hypothetical protein M431DRAFT_79390 [Trichoderma harzianum CBS 226.95])	GO:0016740(molecular_function:transferase activity); GO:0031177(molecular_function:phosphopantetheine binding); GO:0055114(biological_process:oxidation-reduction process); GO:0016491(molecular_function:oxidoreductase activity)				COG3321(S:Function unknown); ENOG410XNPJ(Q:Secondary metabolites biosynthesis, transport and catabolism)	COG3321(Trichothecene 3-O-acetyltransferase); ENOG410XNPJ(polyketide synthase)	PF00109.23(ketoacyl-synt:Beta-ketoacyl synthase, N-terminal domain); PF00698.18(Acyl_transf_1:Acyl transferase domain); PF14765.3(PS-DH:Polyketide synthase dehydratase); PF02801.19(Ketoacyl-synt_C:Beta-ketoacyl synthase, C-terminal domain); PF08659.7(KR:KR domain); PF00107.23(ADH_zinc_N:Zinc-binding dehydrogenase); PF13489.3(Methyltransf_23:Methyltransferase domain); PF08242.9(Methyltransf_12:Met…	sp|Q5BA83|EASB_EMENI(Highly reducing polyketide synthase easB OS=Emericella nidulans (strain FGSC A4 / ATCC 38163 / CBS 112.46 / NRRL 194 / M139) OX=227321 GN=easB PE=3 SV=1)
523201	glycoside hydrolase family 55 protein	2463	4.885	1.15	0.160337	-2.64082	0.00554139	0.0433045	yes	down	XP_024771014.1(glycoside hydrolase family 55 protein [Trichoderma harzianum CBS 226.95])	GO:0016787(molecular_function:hydrolase activity)				ENOG410YFFJ(G:Carbohydrate transport and metabolism); ENOG4110VFP(S:Function unknown)	ENOG410YFFJ(Glycoside hydrolase family 55); ENOG4110VFP(Exo-beta-1,3-glucanase)	PF12708.4(Pectate_lyase_3:Pectate lyase superfamily protein)	sp|P53626|E13B_TRIHA(Glucan endo-1,3-beta-glucosidase BGN13.1 OS=Trichoderma harzianum OX=5544 GN=bgn13.1 PE=1 SV=1)
128286	hypothetical protein	2408	6.66	1.445	0.144202	-2.79384	0.00555045	0.0433045	yes	down	XP_024768146.1(hypothetical protein M431DRAFT_128286 [Trichoderma harzianum CBS 226.95])	GO:0006351(biological_process:transcription, DNA-templated); GO:0005634(cellular_component:nucleus); GO:0006357(biological_process:regulation of transcription from RNA polymerase II promoter); GO:0005488(molecular_function:binding); GO:0003677(molecular_function:DNA binding); GO:0000981(molecular_function:RNA polymerase II transcription factor activity, sequence-specific DNA binding); GO:0008270(…				ENOG410YCG2(K:Transcription)	ENOG410YCG2(Transcription factor)	PF04082.15(Fungal_trans:Fungal specific transcription factor domain); PF00172.15(Zn_clus:Fungal Zn(2)-Cys(6) binuclear cluster domain)
19442	hypothetical protein	2738	2.195	0.255	0.0737268	-3.76167	0.0054	0.0424748	yes	down	XP_024771118.1(hypothetical protein M431DRAFT_19442 [Trichoderma harzianum CBS 226.95])					ENOG410XQ73(S:Function unknown)	ENOG410XQ73(Conserved hypothetical, protein)	PF14033.3(DUF4246:Protein of unknown function (DUF4246))
95852	hypothetical protein	993	5.085	0.895	0.120321	-3.05504	0.00526567	0.0415313	yes	down	XP_024769749.1(hypothetical protein M431DRAFT_95852 [Trichoderma harzianum CBS 226.95])	GO:0016021(cellular_component:integral component of membrane)				ENOG4111IT3(S:Function unknown); ENOG410YH3U(S:Function unknown); ENOG410Y9GA(S:Function unknown)	ENOG4111IT3(-); ENOG410YH3U(integral membrane protein); ENOG410Y9GA(-)
100933	hypothetical protein	660	8555.73	1811.08	0.21655	-2.20723	0.0052554	0.041488	yes	down	XP_024767770.1(hypothetical protein M431DRAFT_100933 [Trichoderma harzianum CBS 226.95])					ENOG41129IB(S:Function unknown)	ENOG41129IB(-)
72027	hypothetical protein	2109	1.61	0.24	0.0958061	-3.38374	0.00524798	0.041488	yes	down	XP_024779684.1(hypothetical protein M431DRAFT_72027 [Trichoderma harzianum CBS 226.95])					ENOG410YGPR(S:Function unknown); ENOG4111ATZ(S:Function unknown); ENOG410YIQ5(S:Function unknown); ENOG41121G8(S:Function unknown); ENOG410YA50(S:Function unknown); ENOG4110UWK(S:Function unknown); ENOG41117AN(S:Function unknown); ENOG410YAGJ(S:Function unknown)	ENOG410YGPR(Heterokaryon incompatibility protein (HET)); ENOG4111ATZ(Heterokaryon incompatibility protein (HET)); ENOG410YIQ5(Heterokaryon incompatibility protein (HET)); ENOG41121G8(Heterokaryon incompatibility protein (HET)); ENOG410YA50(Heterokaryon incompatibility protein (HET)); ENOG4110UWK(Heterokaryon incompatibility protein (HET)); ENOG41117AN(Heterokaryon incompatibility protein (HET)); …	PF06985.8(HET:Heterokaryon incompatibility protein (HET))	sp|Q9UV10|HET6_NEUCR(Heterokaryon incompatibility protein 6, OR allele OS=Neurospora crassa (strain ATCC 24698 / 74-OR23-1A / CBS 708.71 / DSM 1257 / FGSC 987) OX=367110 GN=het-6 PE=4 SV=1)
94116	hypothetical protein	1653	11.695	3.25	0.186818	-2.42029	0.00516777	0.0409453	yes	down	XP_024770652.1(hypothetical protein M431DRAFT_94116 [Trichoderma harzianum CBS 226.95])	GO:0006508(biological_process:proteolysis); GO:0004180(molecular_function:carboxypeptidase activity); GO:0008236(molecular_function:serine-type peptidase activity)				ENOG410XSGG(O:Posttranslational modification, protein turnover, chaperones)	ENOG410XSGG(protease, serine, 16 (thymus))	PF05577.9(Peptidase_S28:Serine carboxypeptidase S28)	sp|D4AYS6|A1345_ARTBC(Probable extracellular serine carboxypeptidase OS=Arthroderma benhamiae (strain ATCC MYA-4681 / CBS 112371) OX=663331 GN=ARB_01345 PE=1 SV=1)
10924	hypothetical protein	1185	1.085	0	0.00897112	-6.8005	0.00515385	0.0408725	yes	down	XP_024768157.1(hypothetical protein M431DRAFT_10924 [Trichoderma harzianum CBS 226.95])	GO:0016021(cellular_component:integral component of membrane)				ENOG4111W6Y(S:Function unknown); ENOG4111RNB(S:Function unknown); ENOG410YRRX(S:Function unknown)	ENOG4111W6Y(Cytochrome P450); ENOG4111RNB(integral membrane protein); ENOG410YRRX(integral membrane protein)
207319	hypothetical protein	3964	41.26	14.655	0.241677	-2.04885	0.00514043	0.0408033	yes	down	XP_024780939.1(hypothetical protein M431DRAFT_207319 [Trichoderma harzianum CBS 226.95])	GO:0005634(cellular_component:nucleus); GO:0000463(biological_process:maturation of LSU-rRNA from tricistronic rRNA transcript (SSU-rRNA, 5.8S rRNA, LSU-rRNA)); GO:0005829(cellular_component:cytosol); GO:0000466(biological_process:maturation of 5.8S rRNA from tricistronic rRNA transcript (SSU-rRNA, 5.8S rRNA, LSU-rRNA)); GO:0005730(cellular_component:nucleolus)	K14861	URB1		ENOG410ZTVV(S:Function unknown); ENOG410XR9W(S:Function unknown); ENOG410ZP4H(S:Function unknown); ENOG411014P(S:Function unknown)	ENOG410ZTVV(Ribosome biogenesis protein Urb1); ENOG410XR9W(URB1 ribosome biogenesis 1 homolog (S. cerevisiae)); ENOG410ZP4H(Ribosome 60S biogenesis N-terminal); ENOG411014P(Ribosome 60S biogenesis N-terminal)	PF11707.5(Npa1:Ribosome 60S biogenesis N-terminal); PF16201.2(NopRA1:Nucleolar pre-ribosomal-associated protein 1)	sp|O74415|YJL2_SCHPO(Uncharacterized protein C14G10.02 OS=Schizosaccharomyces pombe (strain 972 / ATCC 24843) OX=284812 GN=SPCC14G10.02 PE=4 SV=1)
70864	hypothetical protein	1392	0.84	0	0.00946312	-6.72347	0.00511344	0.0406636	yes	down	XP_024780349.1(hypothetical protein M431DRAFT_70864 [Trichoderma harzianum CBS 226.95])	GO:0008168(molecular_function:methyltransferase activity); GO:0046872(molecular_function:metal ion binding); GO:0032259(biological_process:methylation)				ENOG410Y7DR(S:Function unknown)	ENOG410Y7DR(Integral membrane channel protein)	PF09273.8(Rubis-subs-bind:Rubisco LSMT substrate-binding); PF01753.15(zf-MYND:MYND finger); PF00856.25(SET:SET domain)	sp|B7ZUF3|SETD3_XENTR(Histone-lysine N-methyltransferase setd3 OS=Xenopus tropicalis OX=8364 GN=setd3 PE=2 SV=1)
493185	hypothetical protein	5670	16.86	6.385	0.247629	-2.01375	0.00504954	0.0402662	yes	down	XP_024776387.1(hypothetical protein M431DRAFT_493185 [Trichoderma harzianum CBS 226.95])	GO:0017025(molecular_function:TBP-class protein binding); GO:0005739(cellular_component:mitochondrion); GO:0045892(biological_process:negative regulation of transcription, DNA-templated); GO:0005524(molecular_function:ATP binding); GO:0016887(molecular_function:ATPase activity); GO:0003677(molecular_function:DNA binding); GO:0000228(cellular_component:nuclear chromosome); GO:0042790(biological_pr…	K15192	BTAF1, MOT1		ENOG410XP4Z(L:Replication, recombination and repair)	ENOG410XP4Z(excision repair cross-complementing rodent repair deficiency complementation group)	PF12054.5(DUF3535:Domain of unknown function (DUF3535)); PF00176.20(SNF2_N:SNF2 family N-terminal domain); PF00271.28(Helicase_C:Helicase conserved C-terminal domain); PF13646.3(HEAT_2:HEAT repeats)	sp|P32333|MOT1_YEAST(TATA-binding protein-associated factor MOT1 OS=Saccharomyces cerevisiae (strain ATCC 204508 / S288c) OX=559292 GN=MOT1 PE=1 SV=1)
82267	hypothetical protein	699	3.87	0.26	0.0433594	-4.52751	0.00504551	0.0402662	yes	down	XP_024775218.1(hypothetical protein M431DRAFT_82267 [Trichoderma harzianum CBS 226.95])	GO:0016740(molecular_function:transferase activity)				COG0500(S:Function unknown)	COG0500(replication termination factor 2 domain containing 1)	PF13649.3(Methyltransf_25:Methyltransferase domain); PF08241.9(Methyltransf_11:Methyltransferase domain); PF13847.3(Methyltransf_31:Methyltransferase domain); PF13489.3(Methyltransf_23:Methyltransferase domain); PF01209.15(Ubie_methyltran:ubiE/COQ5 methyltransferase family); PF08242.9(Methyltransf_12:Methyltransferase domain); PF05175.11(MTS:Methyltransferase small domain)	sp|A0A0M4KDW1|AURB_CALAK(Methyltransferase ctvB OS=Calcarisporium arbuscula OX=240499 GN=aurB PE=1 SV=1)
481874	hypothetical protein	453	72.04	11.865	0.11292	-3.14663	0.00503434	0.040219	yes	down	XP_024774339.1(hypothetical protein M431DRAFT_481874 [Trichoderma harzianum CBS 226.95])	GO:0005737(cellular_component:cytoplasm); GO:0016021(cellular_component:integral component of membrane)				ENOG4111ZPV(S:Function unknown)	ENOG4111ZPV(conserved hypothetical protein)	PF08570.7(DUF1761:Protein of unknown function (DUF1761))	sp|Q9UTI9|YKZ2_SCHPO(UPF0591 membrane protein C15E1.02c OS=Schizosaccharomyces pombe (strain 972 / ATCC 24843) OX=284812 GN=SPAC15E1.02c PE=3 SV=1)
495171	hypothetical protein	1086	71.125	21.2	0.231061	-2.11365	0.00493268	0.0394797	yes	down	XP_024774616.1(hypothetical protein M431DRAFT_495171 [Trichoderma harzianum CBS 226.95])					ENOG4111PKC(S:Function unknown); ENOG4111XCX(S:Function unknown); COG0596(S:Function unknown); COG5092(I:Lipid transport and metabolism); ENOG4110FUS(S:Function unknown)	ENOG4111PKC(alpha/beta hydrolase fold); ENOG4111XCX(alpha/beta hydrolase fold); COG0596(alpha/beta hydrolase fold); COG5092(Adds a myristoyl group to the N-terminal glycine residue of certain cellular proteins (By similarity)); ENOG4110FUS(alpha/beta hydrolase fold)	PF00561.17(Abhydrolase_1:alpha/beta hydrolase fold); PF12697.4(Abhydrolase_6:Alpha/beta hydrolase family); PF12146.5(Hydrolase_4:Serine aminopeptidase, S33)	sp|A8IAD8|RUTD_AZOC5(Putative aminoacrylate hydrolase RutD OS=Azorhizobium caulinodans (strain ATCC 43989 / DSM 5975 / JCM 20966 / NBRC 14845 / NCIMB 13405 / ORS 571) OX=438753 GN=rutD PE=3 SV=1)
502975	hypothetical protein	1817	439.36	167.505	0.254747	-1.97286	0.00491624	0.0394545	yes	down	XP_024780493.1(hypothetical protein M431DRAFT_502975 [Trichoderma harzianum CBS 226.95])	GO:0046872(molecular_function:metal ion binding); GO:0003676(molecular_function:nucleic acid binding)	K09467	MIG		COG5048(S:Function unknown)	COG5048(-)	PF00096.23(zf-C2H2:Zinc finger, C2H2 type); PF13465.3(zf-H2C2_2:Zinc-finger double domain)	sp|O94131|CREA_GIBFU(DNA-binding protein creA OS=Gibberella fujikuroi OX=5127 GN=CREA PE=3 SV=1)
477595	hypothetical protein	786	120.455	31.37	0.222983	-2.16499	0.00490121	0.0394545	yes	down	XP_024780900.1(hypothetical protein M431DRAFT_477595 [Trichoderma harzianum CBS 226.95])	GO:0010181(molecular_function:FMN binding); GO:0055114(biological_process:oxidation-reduction process); GO:0016491(molecular_function:oxidoreductase activity)				ENOG4112D5H(S:Function unknown)	ENOG4112D5H(Conserved hypothetical, protein)	PF12766.4(Pyridox_oxase_2:Pyridoxamine 5'-phosphate oxidase)
379217	hypothetical protein	2510	253.05	73.025	0.199854	-2.32298	0.00489862	0.0394545	yes	down	XP_024776160.1(hypothetical protein M431DRAFT_379217 [Trichoderma harzianum CBS 226.95])	GO:0003700(molecular_function:transcription factor activity, sequence-specific DNA binding); GO:0006355(biological_process:regulation of transcription, DNA-templated); GO:0043565(molecular_function:sequence-specific DNA binding)				ENOG410YZIY(S:Function unknown)	ENOG410YZIY(B-zip transcription factor)	PF00170.18(bZIP_1:bZIP transcription factor); PF03131.14(bZIP_Maf:bZIP Maf transcription factor); PF07716.12(bZIP_2:Basic region leucine zipper)
513655	hypothetical protein	978	17.7	3.615	0.140442	-2.83196	0.00491355	0.0394545	yes	down	XP_024768100.1(hypothetical protein M431DRAFT_513655 [Trichoderma harzianum CBS 226.95])					COG1335(H:Coenzyme transport and metabolism)	COG1335(PaNtothenate Kinase)	PF00857.17(Isochorismatase:Isochorismatase family)
510377	hypothetical protein	1676	2.14	0.285	0.0834117	-3.58361	0.00492043	0.0394545	yes	down	OPB45504.1(hypothetical protein A0O28_0077140 [Trichoderma guizhouense])	GO:0016021(cellular_component:integral component of membrane); GO:0016020(cellular_component:membrane)				ENOG4110X43(S:Function unknown); ENOG4111IT3(S:Function unknown)	ENOG4110X43(-); ENOG4111IT3(-)
84855	hypothetical protein	1050	3.32	0.42	0.0791899	-3.65854	0.00490357	0.0394545	yes	down	XP_024774480.1(hypothetical protein M431DRAFT_84855 [Trichoderma harzianum CBS 226.95])	GO:0016021(cellular_component:integral component of membrane); GO:0055085(biological_process:transmembrane transport)	K15109	SLC25A20_29, CACT, CACL, CRC1		ENOG410Z9ZS(S:Function unknown)	ENOG410Z9ZS(carrier protein)	PF00153.24(Mito_carr:Mitochondrial carrier protein)	sp|Q54W11|MCFL_DICDI(Mitochondrial substrate carrier family protein L OS=Dictyostelium discoideum OX=44689 GN=mcfL PE=3 SV=1)
6416	hypothetical protein	2121	77.59	19.42	0.168468	-2.56945	0.0048574	0.0394114	yes	down	XP_024773862.1(hypothetical protein M431DRAFT_6416 [Trichoderma harzianum CBS 226.95])	GO:0005737(cellular_component:cytoplasm); GO:0006508(biological_process:proteolysis); GO:0005634(cellular_component:nucleus); GO:0046872(molecular_function:metal ion binding); GO:0008239(molecular_function:dipeptidyl-peptidase activity)	K01277	DPP3		ENOG410XRK4(S:Function unknown)	ENOG410XRK4(peptidase')	PF03571.12(Peptidase_M49:Peptidase family M49)	sp|Q08225|DPP3_YEAST(Probable dipeptidyl peptidase 3 OS=Saccharomyces cerevisiae (strain ATCC 204508 / S288c) OX=559292 GN=YOL057W PE=1 SV=1)
14851	hypothetical protein	1486	0.87	0	0.00887171	-6.81657	0.0048605	0.0394114	yes	down	XP_024778000.1(hypothetical protein M431DRAFT_14851 [Trichoderma harzianum CBS 226.95])	GO:0020037(molecular_function:heme binding); GO:0016020(cellular_component:membrane); GO:0005488(molecular_function:binding); GO:0046872(molecular_function:metal ion binding); GO:0055114(biological_process:oxidation-reduction process); GO:0016491(molecular_function:oxidoreductase activity)	K00326	E1.6.2.2	map00520(Amino sugar and nucleotide sugar metabolism)	COG0543(S:Function unknown)	COG0543(Fungal Zn(2)-Cys(6) binuclear cluster domain)	PF00175.18(NAD_binding_1:Oxidoreductase NAD-binding domain); PF00970.21(FAD_binding_6:Oxidoreductase FAD-binding domain); PF00173.25(Cyt-b5:Cytochrome b5-like Heme/Steroid binding domain); PF08030.9(NAD_binding_6:Ferric reductase NAD binding domain)	sp|A6R2K7|NCB5R_AJECN(NADH-cytochrome b5 reductase 1 OS=Ajellomyces capsulatus (strain NAm1 / WU24) OX=339724 GN=CBR1 PE=3 SV=1)
135236	hypothetical protein	3301	549.52	204.925	0.229477	-2.12358	0.00479728	0.0390083	yes	down	XP_013939134.1(hypothetical protein TRIATDRAFT_148566 [Trichoderma atroviride IMI 206040])	GO:0008270(molecular_function:zinc ion binding)	K17987	NBR1		ENOG411245W(S:Function unknown); ENOG410ZTYM(S:Function unknown); ENOG410ZKCZ(S:Function unknown)	ENOG411245W(ubiquitin-associated (UBA) TS-N domain-containing protein octicosapeptide Phox Bemp1 (PB1) domain-containing protein); ENOG410ZTYM(neighbor of Brca1 gene 1); ENOG410ZKCZ(Chromosome 6 open reading frame 106)	PF16158.2(N_BRCA1_IG:Ig-like domain from next to BRCA1 gene); PF00569.14(ZZ:Zinc finger, ZZ type)	sp|Q9P792|YN8B_SCHPO(ZZ-type zinc finger-containing protein P35G2.11c OS=Schizosaccharomyces pombe (strain 972 / ATCC 24843) OX=284812 GN=SPBP35G2.11c PE=4 SV=1)
430024	hypothetical protein	4034	0.77	0.115	0.102564	-3.2854	0.00477635	0.0389111	yes	down	XP_024774491.1(hypothetical protein M431DRAFT_430024 [Trichoderma harzianum CBS 226.95])					ENOG410Y8QC(S:Function unknown); ENOG4110UTU(S:Function unknown)	ENOG410Y8QC(-); ENOG4110UTU(-)
323	hypothetical protein	4395	15.665	5.465	0.220972	-2.17806	0.00475625	0.0387838	yes	down	XP_024779907.1(hypothetical protein M431DRAFT_323 [Trichoderma harzianum CBS 226.95])	GO:0005737(cellular_component:cytoplasm); GO:0003677(molecular_function:DNA binding); GO:0006351(biological_process:transcription, DNA-templated); GO:0005666(cellular_component:DNA-directed RNA polymerase III complex); GO:0003899(molecular_function:DNA-directed RNA polymerase activity); GO:0042797(biological_process:tRNA transcription from RNA polymerase III promoter)	K03018	RPC1, POLR3A	map00230(Purine metabolism); map00240(Pyrimidine metabolism); map03020(RNA polymerase)	COG0086(K:Transcription)	COG0086(DNA-dependent RNA polymerase catalyzes the transcription of DNA into RNA using the four ribonucleoside triphosphates as substrates (By similarity))	PF04997.9(RNA_pol_Rpb1_1:RNA polymerase Rpb1, domain 1); PF04998.14(RNA_pol_Rpb1_5:RNA polymerase Rpb1, domain 5); PF00623.17(RNA_pol_Rpb1_2:RNA polymerase Rpb1, domain 2); PF04983.15(RNA_pol_Rpb1_3:RNA polymerase Rpb1, domain 3); PF05000.14(RNA_pol_Rpb1_4:RNA polymerase Rpb1, domain 4)	sp|Q6BI69|RPC1_DEBHA(DNA-directed RNA polymerase III subunit RPC1 OS=Debaryomyces hansenii (strain ATCC 36239 / CBS 767 / JCM 1990 / NBRC 0083 / IGC 2968) OX=284592 GN=RPC1 PE=3 SV=2)
82004	hypothetical protein	1560	44.005	7.82	0.129944	-2.94404	0.0047394	0.0387441	yes	down	PKK38612.1(hypothetical protein CI102_15278, partial [Trichoderma harzianum])	GO:0003824(molecular_function:catalytic activity)				COG2133(G:Carbohydrate transport and metabolism)	COG2133(Dehydrogenase)	PF07995.8(GSDH:Glucose / Sorbosone dehydrogenase)	sp|Q44091|SNDH_GLULI(L-sorbosone dehydrogenase OS=Gluconacetobacter liquefaciens OX=89584 PE=4 SV=1)
532194	hypothetical protein	2020	1.135	0.08	0.0468267	-4.41652	0.00473689	0.0387441	yes	down	XP_024773099.1(hypothetical protein M431DRAFT_532194 [Trichoderma harzianum CBS 226.95])	GO:0016021(cellular_component:integral component of membrane); GO:0016020(cellular_component:membrane)				ENOG4111H1Y(S:Function unknown); ENOG410XW1Y(S:Function unknown)	ENOG4111H1Y(Conserved hypothetical, protein); ENOG410XW1Y(transmembrane protein 69)	PF11911.5(DUF3429:Protein of unknown function (DUF3429))
85540	hypothetical protein	426	26.915	5.235	0.13115	-2.93071	0.00472392	0.0387048	yes	down	XP_024774478.1(hypothetical protein M431DRAFT_85540 [Trichoderma harzianum CBS 226.95])	GO:0016021(cellular_component:integral component of membrane)				ENOG410Z16A(S:Function unknown)	ENOG410Z16A(-)
479284	hypothetical protein	5451	6.845	1.835	0.177743	-2.49214	0.0046971	0.0386224	yes	down	XP_024777394.1(hypothetical protein M431DRAFT_479284 [Trichoderma harzianum CBS 226.95])	GO:0046872(molecular_function:metal ion binding)				COG0666(S:Function unknown)	COG0666(-)	PF12796.4(Ank_2:Ankyrin repeats (3 copies)); PF13637.3(Ank_4:Ankyrin repeats (many copies)); PF13606.3(Ank_3:Ankyrin repeat); PF00023.27(Ank:Ankyrin repeat); PF13857.3(Ank_5:Ankyrin repeats (many copies)); PF00569.14(ZZ:Zinc finger, ZZ type)	sp|G5E8K5|ANK3_MOUSE(Ankyrin-3 OS=Mus musculus OX=10090 GN=Ank3 PE=1 SV=1)
554943	hypothetical protein	1503	1.15	0.03	0.0168232	-5.8934	0.0046677	0.0384232	yes	down	XP_024773403.1(hypothetical protein M431DRAFT_554943 [Trichoderma harzianum CBS 226.95])	GO:0016021(cellular_component:integral component of membrane); GO:0055085(biological_process:transmembrane transport)				COG0477(S:Function unknown)	COG0477(C6 finger domain protein)	PF07690.13(MFS_1:Major Facilitator Superfamily)	sp|A0A089FNE5|PRLL_FUNXX(MFS transporter prlL OS=Fungal sp. (strain NRRL 50135) OX=1547289 GN=prlL PE=3 SV=1)
6371	hypothetical protein	3435	0.965	0.14	0.0947317	-3.40001	0.00465917	0.0383895	yes	down	XP_024773811.1(hypothetical protein M431DRAFT_6371 [Trichoderma harzianum CBS 226.95])	GO:0005524(molecular_function:ATP binding)				ENOG410XQ0U(S:Function unknown); COG0553(S:Function unknown)	ENOG410XQ0U(Pfam:DUF2351); COG0553(Pfam:DUF2351)	PF00176.20(SNF2_N:SNF2 family N-terminal domain); PF00271.28(Helicase_C:Helicase conserved C-terminal domain)	sp|O13762|YF2C_SCHPO(Uncharacterized ATP-dependent helicase C17A2.12 OS=Schizosaccharomyces pombe (strain 972 / ATCC 24843) OX=284812 GN=SPAC17A2.12 PE=3 SV=1)
76046	hypothetical protein	1131	10.81	2.72	0.17425	-2.52077	0.00462072	0.038218	yes	down	XP_024779236.1(hypothetical protein M431DRAFT_76046 [Trichoderma harzianum CBS 226.95])	GO:0005634(cellular_component:nucleus); GO:0006357(biological_process:regulation of transcription from RNA polymerase II promoter); GO:0008270(molecular_function:zinc ion binding); GO:0000981(molecular_function:RNA polymerase II transcription factor activity, sequence-specific DNA binding)				ENOG410YMGR(S:Function unknown); ENOG410YFWU(S:Function unknown); ENOG4110XQE(S:Function unknown)	ENOG410YMGR(-); ENOG410YFWU(GAL4); ENOG4110XQE(-)	PF11951.5(Fungal_trans_2:Fungal specific transcription factor domain)	sp|Q5B288|Y5342_EMENI(Uncharacterized protein AN5342 OS=Emericella nidulans (strain FGSC A4 / ATCC 38163 / CBS 112.46 / NRRL 194 / M139) OX=227321 GN=AN5342 PE=1 SV=1)
100447	hypothetical protein	2418	31.15	10.3	0.226628	-2.1416	0.00461417	0.0382002	yes	down	XP_024767947.1(hypothetical protein M431DRAFT_100447 [Trichoderma harzianum CBS 226.95])	GO:0005737(cellular_component:cytoplasm); GO:0004806(molecular_function:triglyceride lipase activity); GO:0006629(biological_process:lipid metabolic process); GO:0016020(cellular_component:membrane); GO:0016042(biological_process:lipid catabolic process); GO:0008152(biological_process:metabolic process)	K14674	TGL4	map00100(Steroid biosynthesis); map00561(Glycerolipid metabolism); map00564(Glycerophospholipid metabolism); map00565(Ether lipid metabolism); map00590(Arachidonic acid metabolism); map00591(Linoleic acid metabolism); map00592(alpha-Linolenic acid metabolism)	COG1752(S:Function unknown)	COG1752(oxidoreductase)	PF11815.5(DUF3336:Domain of unknown function (DUF3336)); PF01734.19(Patatin:Patatin-like phospholipase)	sp|P36165|TGL4_YEAST(Lipase 4 OS=Saccharomyces cerevisiae (strain ATCC 204508 / S288c) OX=559292 GN=TGL4 PE=1 SV=1)
505610	hypothetical protein	934	23.99	6.585	0.171133	-2.54681	0.0045881	0.0380571	yes	down	XP_024777730.1(hypothetical protein M431DRAFT_505610 [Trichoderma harzianum CBS 226.95])	GO:0008080(molecular_function:N-acetyltransferase activity)				COG1670(J:Translation, ribosomal structure and biogenesis); ENOG41124V2(J:Translation, ribosomal structure and biogenesis)	COG1670(-acetyltransferase); ENOG41124V2(-acetyltransferase)	PF13302.4(Acetyltransf_3:Acetyltransferase (GNAT) domain); PF00583.22(Acetyltransf_1:Acetyltransferase (GNAT) family); PF13420.4(Acetyltransf_4:Acetyltransferase (GNAT) domain); PF13523.3(Acetyltransf_8:Acetyltransferase (GNAT) domain)	sp|P94482|YNAD_BACSU(Uncharacterized N-acetyltransferase YnaD OS=Bacillus subtilis (strain 168) OX=224308 GN=ynaD PE=3 SV=1)
479513	hypothetical protein	1938	3.81	0.805	0.130453	-2.9384	0.00457227	0.0380401	yes	down	XP_024777647.1(hypothetical protein M431DRAFT_479513 [Trichoderma harzianum CBS 226.95])	GO:0005634(cellular_component:nucleus); GO:0006357(biological_process:regulation of transcription from RNA polymerase II promoter); GO:0006351(biological_process:transcription, DNA-templated); GO:0003677(molecular_function:DNA binding); GO:0000981(molecular_function:RNA polymerase II transcription factor activity, sequence-specific DNA binding); GO:0008270(molecular_function:zinc ion binding)				ENOG4110XU2(K:Transcription); ENOG410YEXU(K:Transcription)	ENOG4110XU2(Fungal_trans); ENOG410YEXU(transcription factor)	PF04082.15(Fungal_trans:Fungal specific transcription factor domain); PF00172.15(Zn_clus:Fungal Zn(2)-Cys(6) binuclear cluster domain)	sp|P52959|CTF1B_FUSSO(Cutinase transcription factor 1 beta OS=Fusarium solani subsp. pisi OX=70791 GN=CTF1-BETA PE=2 SV=1)
487539	hypothetical protein	1491	1.555	0.09	0.0374069	-4.74055	0.00457659	0.0380401	yes	down	XP_024768225.1(hypothetical protein M431DRAFT_487539 [Trichoderma harzianum CBS 226.95])	GO:0045735(molecular_function:nutrient reservoir activity); GO:0033609(biological_process:oxalate metabolic process)				COG2140(Q:Secondary metabolites biosynthesis, transport and catabolism)	COG2140(Cytochrome p450)	PF00190.19(Cupin_1:Cupin); PF07883.8(Cupin_2:Cupin domain); PF05899.9(Cupin_3:Protein of unknown function (DUF861)); PF01050.15(MannoseP_isomer:Mannose-6-phosphate isomerase); PF02311.16(AraC_binding:AraC-like ligand binding domain)	sp|O34714|OXDC_BACSU(Oxalate decarboxylase OxdC OS=Bacillus subtilis (strain 168) OX=224308 GN=oxdC PE=1 SV=1)
154572	hypothetical protein	2658	4.115	1.23	0.195783	-2.35267	0.00453618	0.0378801	yes	down	XP_024768704.1(hypothetical protein M431DRAFT_154572 [Trichoderma harzianum CBS 226.95])	GO:0006351(biological_process:transcription, DNA-templated); GO:0005634(cellular_component:nucleus); GO:0006357(biological_process:regulation of transcription from RNA polymerase II promoter); GO:0005488(molecular_function:binding); GO:0003677(molecular_function:DNA binding); GO:0000981(molecular_function:RNA polymerase II transcription factor activity, sequence-specific DNA binding); GO:0008270(…				ENOG410YCKW(S:Function unknown); ENOG410YD36(S:Function unknown); ENOG410YBPF(K:Transcription); ENOG410XVU0(K:Transcription)	ENOG410YCKW(Dehydrogenase reductase); ENOG410YD36(Fungal_trans); ENOG410YBPF(Fungal_trans); ENOG410XVU0(Transcription factor)	PF04082.15(Fungal_trans:Fungal specific transcription factor domain); PF00172.15(Zn_clus:Fungal Zn(2)-Cys(6) binuclear cluster domain)	sp|A0A0E4AZF8|FSA6_FUSSF(Fusarisetin A cluster transcription factor fsa6 OS=Fusarium sp. (strain FN080326) OX=1608308 GN=fsa6 PE=4 SV=1)
113600	hypothetical protein	2997	65.065	19.745	0.196012	-2.35099	0.00451499	0.0378125	yes	down	XP_024775239.1(hypothetical protein M431DRAFT_113600 [Trichoderma harzianum CBS 226.95])	GO:1902600(biological_process:hydrogen ion transmembrane transport); GO:0016021(cellular_component:integral component of membrane); GO:0015299(molecular_function:solute:proton antiporter activity)				COG0475(P:Inorganic ion transport and metabolism)	COG0475(Sodium hydrogen exchanger)	PF00999.18(Na_H_Exchanger:Sodium/hydrogen exchanger family)	sp|Q9P7I1|KHA1_SCHPO(K(+)/H(+) antiporter 1 OS=Schizosaccharomyces pombe (strain 972 / ATCC 24843) OX=284812 GN=kha1 PE=3 SV=2)
507685	hypothetical protein	580	5.41	0.36	0.0436929	-4.51646	0.00449808	0.0377438	yes	down	XP_024775694.1(hypothetical protein M431DRAFT_507685 [Trichoderma harzianum CBS 226.95])
491967	hypothetical protein	4911	0.44	0.035	0.0507516	-4.3004	0.00449082	0.0377194	yes	down	XP_024777406.1(hypothetical protein M431DRAFT_491967 [Trichoderma harzianum CBS 226.95])					ENOG4112BWR(S:Function unknown); ENOG411004K(S:Function unknown); ENOG410YIPC(S:Function unknown)	ENOG4112BWR(WD40); ENOG411004K(Putative serine esterase (DUF676)); ENOG410YIPC(serine active site containing 1)	PF07819.10(PGAP1:PGAP1-like protein); PF12697.4(Abhydrolase_6:Alpha/beta hydrolase family); PF05729.9(NACHT:NACHT domain); PF05057.11(DUF676:Putative serine esterase (DUF676))	sp|Q2TBM9|SRAC1_BOVIN(Protein SERAC1 OS=Bos taurus OX=9913 GN=SERAC1 PE=2 SV=1)
173532	hypothetical protein	1063	2.32	0.185	0.0512155	-4.28728	0.00443372	0.0373121	yes	down	XP_024779864.1(hypothetical protein M431DRAFT_173532 [Trichoderma harzianum CBS 226.95])					ENOG4110WFV(S:Function unknown); COG0596(S:Function unknown)	ENOG4110WFV(-); COG0596(-)
502704	hypothetical protein	1963	68.92	22.865	0.249263	-2.00426	0.00441463	0.0372238	yes	down	XP_024780244.1(hypothetical protein M431DRAFT_502704 [Trichoderma harzianum CBS 226.95])	GO:0016020(cellular_component:membrane); GO:0005215(molecular_function:transporter activity); GO:0016021(cellular_component:integral component of membrane); GO:0006810(biological_process:transport); GO:0055085(biological_process:transmembrane transport)				ENOG410YD2X(S:Function unknown); COG0591(E:Amino acid transport and metabolism)	ENOG410YD2X(-); COG0591(symporter)	PF00474.14(SSF:Sodium:solute symporter family)
99853	hypothetical protein	1494	4.725	0.605	0.0868139	-3.52593	0.00439929	0.0371667	yes	down	XP_024768169.1(hypothetical protein M431DRAFT_99853 [Trichoderma harzianum CBS 226.95])	GO:0004497(molecular_function:monooxygenase activity); GO:0020037(molecular_function:heme binding); GO:0016021(cellular_component:integral component of membrane); GO:0016705(molecular_function:oxidoreductase activity, acting on paired donors, with incorporation or reduction of molecular oxygen); GO:0005506(molecular_function:iron ion binding); GO:0055114(biological_process:oxidation-reduction pro…				COG2124(S:Function unknown)	COG2124(Alpha beta hydrolase)	PF00067.19(p450:Cytochrome P450)	sp|A0A084API1|SAT11_STACB(Cytochrome P450 monooxygenase SAT11 OS=Stachybotrys chartarum (strain CBS 109288 / IBT 7711) OX=1280523 GN=SAT11 PE=3 SV=1)
524241	hypothetical protein	1821	111.845	29.85	0.177416	-2.49479	0.00438974	0.0371222	yes	down	XP_024769393.1(hypothetical protein M431DRAFT_524241 [Trichoderma harzianum CBS 226.95])	GO:0003995(molecular_function:acyl-CoA dehydrogenase activity); GO:0050660(molecular_function:flavin adenine dinucleotide binding); GO:0055114(biological_process:oxidation-reduction process)	K00253	IVD, ivd	map00280(Valine, leucine and isoleucine degradation)	ENOG410XNMY(I:Lipid transport and metabolism)	ENOG410XNMY(carboxylase)	PF00441.21(Acyl-CoA_dh_1:Acyl-CoA dehydrogenase, C-terminal domain); PF02771.13(Acyl-CoA_dh_N:Acyl-CoA dehydrogenase, N-terminal domain); PF02770.16(Acyl-CoA_dh_M:Acyl-CoA dehydrogenase, middle domain); PF08028.8(Acyl-CoA_dh_2:Acyl-CoA dehydrogenase, C-terminal domain); PF11794.5(HpaB_N:4-hydroxyphenylacetate 3-hydroxylase N terminal)	sp|Q9FS87|IVD_SOLTU(Isovaleryl-CoA dehydrogenase, mitochondrial OS=Solanum tuberosum OX=4113 GN=IVD PE=1 SV=2)
120572	hypothetical protein	1269	1.04	0	0.00856144	-6.86793	0.00437534	0.0370366	yes	down	XP_024771766.1(hypothetical protein M431DRAFT_120572 [Trichoderma harzianum CBS 226.95])	GO:0008483(molecular_function:transaminase activity); GO:0030170(molecular_function:pyridoxal phosphate binding); GO:0003824(molecular_function:catalytic activity)				COG0161(G:Carbohydrate transport and metabolism)	COG0161(Transporter)	PF00202.18(Aminotran_3:Aminotransferase class-III)	sp|O94562|YGD3_SCHPO(Uncharacterized aminotransferase C1771.03c OS=Schizosaccharomyces pombe (strain 972 / ATCC 24843) OX=284812 GN=SPBC1773.03c PE=3 SV=1)
5273	hypothetical protein	4386	18.935	5.855	0.198901	-2.32988	0.00436438	0.037016	yes	down	XP_024774301.1(hypothetical protein M431DRAFT_5273 [Trichoderma harzianum CBS 226.95])					ENOG4112A5G(S:Function unknown); ENOG4110UDH(S:Function unknown)	ENOG4112A5G(C-x8-C-x5-C-x3-H type zinc finger protein); ENOG4110UDH(-)	PF00642.21(zf-CCCH:Zinc finger C-x8-C-x5-C-x3-H type (and similar))
512754	hypothetical protein	1450	2.085	0.185	0.0574536	-4.12146	0.00432855	0.0367842	yes	down	XP_024769268.1(hypothetical protein M431DRAFT_512754 [Trichoderma harzianum CBS 226.95])					ENOG4112C61(S:Function unknown)	ENOG4112C61(Dehydrogenase)
540582	hypothetical protein	1545	1.48	0.115	0.0496759	-4.33131	0.00432694	0.0367842	yes	down	XP_024770347.1(hypothetical protein M431DRAFT_540582 [Trichoderma harzianum CBS 226.95])	GO:0016020(cellular_component:membrane)				ENOG4110XNY(S:Function unknown); ENOG4111CGV(U:Intracellular trafficking, secretion, and vesicular transport)	ENOG4110XNY(-); ENOG4111CGV(-)	PF08693.7(SKG6:Transmembrane alpha-helix domain)
504049	hypothetical protein	1146	1.075	0	0.0095448	-6.71107	0.00430214	0.0366676	yes	down	XP_024778772.1(hypothetical protein M431DRAFT_504049 [Trichoderma harzianum CBS 226.95])		K00889	PIP5K	map04139(Mitophagy - yeast); map04144(Endocytosis); map04011(MAPK signaling pathway - yeast); map04070(Phosphatidylinositol signaling system); map00562(Inositol phosphate metabolism)	COG4642(S:Function unknown); ENOG4112BEU(S:Function unknown)	COG4642(whole genome shotgun sequence); ENOG4112BEU(-)	PF02493.17(MORN:MORN repeat)	sp|Q8RY89|PI5K8_ARATH(Phosphatidylinositol 4-phosphate 5-kinase 8 OS=Arabidopsis thaliana OX=3702 GN=PIP5K8 PE=1 SV=1)
10838	hypothetical protein	2796	0.395	0	0.00900854	-6.79449	0.00427922	0.0365802	yes	down	XP_024768054.1(hypothetical protein M431DRAFT_10838 [Trichoderma harzianum CBS 226.95])					ENOG410YD6X(S:Function unknown); ENOG410Y9NM(S:Function unknown); ENOG4110BE8(S:Function unknown); ENOG410XZZI(S:Function unknown); ENOG410YY8Y(S:Function unknown)	ENOG410YD6X(-); ENOG410Y9NM(-); ENOG4110BE8(-); ENOG410XZZI(-); ENOG410YY8Y(-)	PF14441.3(OTT_1508_deam:OTT_1508-like deaminase)
99527	hypothetical protein	816	1.82	0	0.00900854	-6.79449	0.00427922	0.0365802	yes	down	XP_024768262.1(hypothetical protein M431DRAFT_99527 [Trichoderma harzianum CBS 226.95])					ENOG4110W4Y(S:Function unknown); ENOG410YT5F(S:Function unknown); ENOG410YTT2(S:Function unknown)	ENOG4110W4Y(Kp4); ENOG410YT5F(Kp4); ENOG410YTT2(Kp4)	PF09044.7(Kp4:Kp4)	sp|Q90121|KP4T_UMV4(KP4 killer toxin OS=Ustilago maydis P4 virus OX=11009 GN=M2A PE=1 SV=1)
96521	hypothetical protein	1719	118.05	32.09	0.18243	-2.45459	0.00426917	0.0365664	yes	down	XP_024769392.1(hypothetical protein M431DRAFT_96521 [Trichoderma harzianum CBS 226.95])	GO:0016874(molecular_function:ligase activity)	K01969	E6.4.1.4B	map00280(Valine, leucine and isoleucine degradation)	COG4799(I:Lipid transport and metabolism)	COG4799(carboxylase)	PF01039.19(Carboxyl_trans:Carboxyl transferase domain)	sp|Q9V9A7|MCCB_DROME(Probable methylcrotonoyl-CoA carboxylase beta chain, mitochondrial OS=Drosophila melanogaster OX=7227 GN=l(2)04524 PE=2 SV=1)
84312	hypothetical protein	1977	44.77	13.4	0.202457	-2.30431	0.0042321	0.0363566	yes	down	XP_024775645.1(hypothetical protein M431DRAFT_84312 [Trichoderma harzianum CBS 226.95])	GO:0006355(biological_process:regulation of transcription, DNA-templated); GO:0005634(cellular_component:nucleus); GO:0006357(biological_process:regulation of transcription from RNA polymerase II promoter); GO:0008270(molecular_function:zinc ion binding); GO:0000981(molecular_function:RNA polymerase II transcription factor activity, sequence-specific DNA binding)				ENOG410XRIW(S:Function unknown)	ENOG410XRIW(C6 transcription factor)	PF11951.5(Fungal_trans_2:Fungal specific transcription factor domain); PF00172.15(Zn_clus:Fungal Zn(2)-Cys(6) binuclear cluster domain)	sp|Q9UT46|MOC3_SCHPO(Transcriptional regulatory protein moc3 OS=Schizosaccharomyces pombe (strain 972 / ATCC 24843) OX=284812 GN=moc3 PE=1 SV=4)
511478	hypothetical protein	737	201.065	37.665	0.136581	-2.87217	0.00420159	0.0361482	yes	down	XP_024771059.1(hypothetical protein M431DRAFT_511478 [Trichoderma harzianum CBS 226.95])					ENOG41126WT(S:Function unknown); ENOG4110W2B(S:Function unknown)	ENOG41126WT(-); ENOG4110W2B(-)
11443	hypothetical protein	5046	16.61	3.12	0.131736	-2.92428	0.00420367	0.0361482	yes	down	XP_024767502.1(hypothetical protein M431DRAFT_11443 [Trichoderma harzianum CBS 226.95])					ENOG410XT20(S:Function unknown); ENOG411144Y(S:Function unknown)	ENOG410XT20(-); ENOG411144Y(-)
78695	hypothetical protein	4083	15.95	4.28	0.180577	-2.46931	0.00411661	0.0356116	yes	down	XP_024777767.1(hypothetical protein M431DRAFT_78695 [Trichoderma harzianum CBS 226.95])	GO:0016787(molecular_function:hydrolase activity); GO:0005829(cellular_component:cytosol)	K01469	OPLAH, OXP1, oplAH	map00480(Glutathione metabolism)	COG0146(E:Amino acid transport and metabolism); COG0146(Q:Secondary metabolites biosynthesis, transport and catabolism); COG0145(E:Amino acid transport and metabolism); COG0145(Q:Secondary metabolites biosynthesis, transport and catabolism)	COG0146(5-oxoprolinase); COG0146(5-oxoprolinase); COG0145(5-oxoprolinase); COG0145(5-oxoprolinase)	PF02538.11(Hydantoinase_B:Hydantoinase B/oxoprolinase); PF01968.15(Hydantoinase_A:Hydantoinase/oxoprolinase); PF05378.10(Hydant_A_N:Hydantoinase/oxoprolinase N-terminal region)	sp|Q10094|YAOF_SCHPO(Uncharacterized protein C11D3.15 OS=Schizosaccharomyces pombe (strain 972 / ATCC 24843) OX=284812 GN=SPAC11D3.15 PE=3 SV=1)
347134	hypothetical protein	1845	1.71	0.205	0.0767047	-3.70454	0.00410564	0.0355663	yes	down	XP_024777331.1(hypothetical protein M431DRAFT_347134 [Trichoderma harzianum CBS 226.95])
517258	hypothetical protein	1052	1.19	0	0.00958573	-6.7049	0.00410728	0.0355663	yes	down	XP_024777294.1(hypothetical protein M431DRAFT_517258 [Trichoderma harzianum CBS 226.95])
534538	hypothetical protein	1780	2.055	0.265	0.0791597	-3.65909	0.00408779	0.0355413	yes	down	XP_024769497.1(hypothetical protein M431DRAFT_534538 [Trichoderma harzianum CBS 226.95])	GO:0016021(cellular_component:integral component of membrane); GO:0055085(biological_process:transmembrane transport)				COG0738(G:Carbohydrate transport and metabolism); COG0110(S:Function unknown); ENOG410YCTC(S:Function unknown)	COG0738(Transporter); COG0110(acetyltransferase); ENOG410YCTC(acetyltransferase)	PF07690.13(MFS_1:Major Facilitator Superfamily)	sp|Q08280|BSC6_YEAST(Bypass of stop codon protein 6 OS=Saccharomyces cerevisiae (strain ATCC 204508 / S288c) OX=559292 GN=BSC6 PE=1 SV=1)
99474	glycosyltransferase family 1 protein	2664	7	1.835	0.165719	-2.59319	0.00400905	0.0350307	yes	down	XP_024768349.1(glycosyltransferase family 1 protein [Trichoderma harzianum CBS 226.95])	GO:0016758(molecular_function:transferase activity, transferring hexosyl groups); GO:0005975(biological_process:carbohydrate metabolic process); GO:0030259(biological_process:lipid glycosylation)				COG1819(C:Energy production and conversion)	COG1819(Dehydrogenase)	PF03033.17(Glyco_transf_28:Glycosyltransferase family 28 N-terminal domain); PF00201.15(UDPGT:UDP-glucoronosyl and UDP-glucosyl transferase)	sp|Q9M8Z7|U80A2_ARATH(Sterol 3-beta-glucosyltransferase UGT80A2 OS=Arabidopsis thaliana OX=3702 GN=UGT80A2 PE=1 SV=1)
105268	hypothetical protein	10016	7.485	2.24	0.19942	-2.32612	0.00399044	0.0349033	yes	down	OPB38099.1(hypothetical protein A0O28_0012030 [Trichoderma guizhouense])	GO:0016021(cellular_component:integral component of membrane); GO:0006113(biological_process:fermentation)				ENOG410XT7P(S:Function unknown); ENOG41101T2(S:Function unknown); ENOG410ZVPX(S:Function unknown)	ENOG410XT7P(kiaa1109); ENOG41101T2(-); ENOG410ZVPX(-)		sp|Q12150|CSF1_YEAST(Protein CSF1 OS=Saccharomyces cerevisiae (strain ATCC 204508 / S288c) OX=559292 GN=CSF1 PE=3 SV=1)
490753	hypothetical protein	6339	1.895	0.5	0.175623	-2.50945	0.00398302	0.0348735	yes	down	XP_024778808.1(hypothetical protein M431DRAFT_490753 [Trichoderma harzianum CBS 226.95])					COG0666(S:Function unknown)	COG0666(Fungal specific transcription factor domain)	PF12796.4(Ank_2:Ankyrin repeats (3 copies)); PF13637.3(Ank_4:Ankyrin repeats (many copies)); PF00023.27(Ank:Ankyrin repeat); PF13857.3(Ank_5:Ankyrin repeats (many copies)); PF13606.3(Ank_3:Ankyrin repeat); PF05729.9(NACHT:NACHT domain); PF13191.3(AAA_16:AAA ATPase domain)	sp|Q4UMH6|Y381_RICFE(Putative ankyrin repeat protein RF_0381 OS=Rickettsia felis (strain ATCC VR-1525 / URRWXCal2) OX=315456 GN=RF_0381 PE=4 SV=1)
527768	hypothetical protein	2670	0.405	0	0.00954455	-6.71111	0.00396503	0.034778	yes	down	XP_024778894.1(hypothetical protein M431DRAFT_527768 [Trichoderma harzianum CBS 226.95])		K12464	MAGED1, NRAGE		ENOG410ZV3P(S:Function unknown); ENOG4111S70(S:Function unknown); ENOG410XS59(S:Function unknown); ENOG4111YPH(S:Function unknown)	ENOG410ZV3P(-); ENOG4111S70(-); ENOG410XS59(Heparan sulfate glucosamine 3-O-sulfotransferase); ENOG4111YPH(family with sequence similarity 186, member A)	PF01391.15(Collagen:Collagen triple helix repeat (20 copies))	sp|Q9ES73|MAGD1_RAT(Melanoma-associated antigen D1 OS=Rattus norvegicus OX=10116 GN=Maged1 PE=1 SV=3)
79377	hypothetical protein	834	416.925	94.43	0.160178	-2.64225	0.00395316	0.0347173	yes	down	XP_024777183.1(hypothetical protein M431DRAFT_79377 [Trichoderma harzianum CBS 226.95])	GO:0005737(cellular_component:cytoplasm); GO:0005829(cellular_component:cytosol); GO:0003824(molecular_function:catalytic activity); GO:0008152(biological_process:metabolic process); GO:0006747(biological_process:FAD biosynthetic process); GO:0003919(molecular_function:FMN adenylyltransferase activity); GO:0005634(cellular_component:nucleus)	K00953	FLAD1	map00740(Riboflavin metabolism)	COG0175(P:Inorganic ion transport and metabolism)	COG0175(Reduction of activated sulfate into sulfite (By similarity))	PF01507.16(PAPS_reduct:Phosphoadenosine phosphosulfate reductase family)	sp|O74841|FAD1_SCHPO(Probable FAD synthase OS=Schizosaccharomyces pombe (strain 972 / ATCC 24843) OX=284812 GN=SPCC1235.04c PE=3 SV=1)
90768	hypothetical protein	1779	14.355	2.54	0.116686	-3.0993	0.00388702	0.0342753	yes	down	XP_024771795.1(hypothetical protein M431DRAFT_90768 [Trichoderma harzianum CBS 226.95])					COG3673(S:Function unknown)	COG3673(RNA binding motif protein 25)	PF09994.6(DUF2235:Uncharacterized alpha/beta hydrolase domain (DUF2235))	sp|P39992|YEC3_YEAST(Uncharacterized protein YEL023C OS=Saccharomyces cerevisiae (strain ATCC 204508 / S288c) OX=559292 GN=YEL023C PE=1 SV=1)
153281	hypothetical protein	2121	0.505	0	0.0097098	-6.68634	0.00388102	0.0342573	yes	down	XP_024769276.1(hypothetical protein M431DRAFT_153281 [Trichoderma harzianum CBS 226.95])	GO:0016021(cellular_component:integral component of membrane); GO:0016020(cellular_component:membrane)				ENOG4111F9U(S:Function unknown); ENOG410Y95Y(S:Function unknown)	ENOG4111F9U(Regulator of G protein signaling domain); ENOG410Y95Y(-)	PF00615.16(RGS:Regulator of G protein signaling domain)
119054	hypothetical protein	1721	11.53	3.305	0.188237	-2.40938	0.00386112	0.0341164	yes	down	XP_024773012.1(hypothetical protein M431DRAFT_119054 [Trichoderma harzianum CBS 226.95])	GO:0016021(cellular_component:integral component of membrane); GO:0016020(cellular_component:membrane)	K20858	MCU		ENOG410XPCP(S:Function unknown)	ENOG410XPCP(Conserved hypothetical, protein)	PF04678.10(MCU:Mitochondrial calcium uniporter)
532417	carbohydrate-binding module family 24 protein	4572	0.365	0.015	0.0287468	-5.12046	0.00381244	0.0337896	yes	down	XP_024772369.1(carbohydrate-binding module family 24 protein [Trichoderma harzianum CBS 226.95])	GO:0005975(biological_process:carbohydrate metabolic process); GO:0016798(molecular_function:hydrolase activity, acting on glycosyl bonds); GO:0071704(biological_process:organic substance metabolic process); GO:0008061(molecular_function:chitin binding); GO:0008152(biological_process:metabolic process); GO:0004553(molecular_function:hydrolase activity, hydrolyzing O-glycosyl compounds); GO:000456…				COG3325(S:Function unknown)	COG3325(-)	PF00704.25(Glyco_hydro_18:Glycosyl hydrolases family 18); PF01476.17(LysM:LysM domain); PF00187.16(Chitin_bind_1:Chitin recognition protein)	sp|P09805|KTXA_KLULA(Killer toxin subunits alpha/beta OS=Kluyveromyces lactis (strain ATCC 8585 / CBS 2359 / DSM 70799 / NBRC 1267 / NRRL Y-1140 / WM37) OX=284590 PE=1 SV=1)
109786	hypothetical protein	2402	2.8	0.585	0.133996	-2.89974	0.00380392	0.0337486	yes	down	XP_024777567.1(hypothetical protein M431DRAFT_109786 [Trichoderma harzianum CBS 226.95])					ENOG4110WEY(S:Function unknown); ENOG410YBIX(S:Function unknown); ENOG4111A73(S:Function unknown); ENOG410YDK9(S:Function unknown); ENOG410YHYX(S:Function unknown)	ENOG4110WEY(Heterokaryon incompatibility protein (HET)); ENOG410YBIX(Heterokaryon incompatibility protein (HET)); ENOG4111A73(Heterokaryon incompatibility protein (HET)); ENOG410YDK9(Heterokaryon incompatibility protein (HET)); ENOG410YHYX(Heterokaryon incompatibility protein (HET))	PF06985.8(HET:Heterokaryon incompatibility protein (HET))
73442	hypothetical protein	1833	2.615	0.265	0.0651113	-3.94095	0.00379926	0.0337418	yes	down	XP_024779983.1(hypothetical protein M431DRAFT_73442 [Trichoderma harzianum CBS 226.95])					COG2072(S:Function unknown)	COG2072(-)	PF13738.3(Pyr_redox_3:Pyridine nucleotide-disulphide oxidoreductase); PF07992.11(Pyr_redox_2:Pyridine nucleotide-disulphide oxidoreductase); PF00743.16(FMO-like:Flavin-binding monooxygenase-like); PF13434.3(K_oxygenase:L-lysine 6-monooxygenase (NADPH-requiring)); PF13450.3(NAD_binding_8:NAD(P)-binding Rossmann-like domain); PF01266.21(DAO:FAD dependent oxidoreductase); PF01494.16(FAD_binding_3:FA…	sp|Q9LFM5|YUC4_ARATH(Probable indole-3-pyruvate monooxygenase YUCCA4 OS=Arabidopsis thaliana OX=3702 GN=YUC4 PE=1 SV=1)
440277	hypothetical protein	718	2.845	0	0.00694551	-7.1697	0.00379319	0.0337224	yes	down	XP_024767052.1(hypothetical protein M431DRAFT_440277 [Trichoderma harzianum CBS 226.95])					ENOG411193X(S:Function unknown)	ENOG411193X(-)
6870	hypothetical protein	1542	8.7	1.795	0.128982	-2.95476	0.00374459	0.0333931	yes	down	XP_024772999.1(hypothetical protein M431DRAFT_6870 [Trichoderma harzianum CBS 226.95])	GO:0004497(molecular_function:monooxygenase activity); GO:0020037(molecular_function:heme binding); GO:0016021(cellular_component:integral component of membrane); GO:0016705(molecular_function:oxidoreductase activity, acting on paired donors, with incorporation or reduction of molecular oxygen); GO:0005506(molecular_function:iron ion binding); GO:0055114(biological_process:oxidation-reduction pro…	K07824	CYP53A1		COG2124(S:Function unknown)	COG2124(Phosphatase that hydrolyzes non-canonical purine nucleotides such as XTP and ITP to their respective diphosphate derivatives. Probably excludes non-canonical purines from DNA precursor pool, thus preventing their incorporation into DNA and avoiding chromosomal lesions)	PF00067.19(p450:Cytochrome P450)	sp|P17549|CP53_ASPNG(Benzoate 4-monooxygenase OS=Aspergillus niger OX=5061 GN=bphA PE=1 SV=1)
322295	hypothetical protein	1694	192.34	51.38	0.187694	-2.41355	0.00372512	0.0333657	yes	down	XP_024768566.1(hypothetical protein M431DRAFT_322295 [Trichoderma harzianum CBS 226.95])	GO:0043547(biological_process:positive regulation of GTPase activity); GO:0043614(cellular_component:multi-eIF complex); GO:0022627(cellular_component:cytosolic small ribosomal subunit); GO:0005092(molecular_function:GDP-dissociation inhibitor activity); GO:0005829(cellular_component:cytosol); GO:0045947(biological_process:negative regulation of translational initiation); GO:0005096(molecular_fun…	K03262	EIF5	map03013(RNA transport)	COG1601(S:Function unknown)	COG1601(tHO complex)	PF01873.14(eIF-5_eIF-2B:Domain found in IF2B/IF5); PF02020.15(W2:eIF4-gamma/eIF5/eIF2-epsilon)	sp|Q09689|IF5_SCHPO(Probable eukaryotic translation initiation factor 5 OS=Schizosaccharomyces pombe (strain 972 / ATCC 24843) OX=284812 GN=tif5 PE=3 SV=1)
91914	hypothetical protein	372	9.91	0	0.00818752	-6.93236	0.00373382	0.0333657	yes	down	XP_024771442.1(hypothetical protein M431DRAFT_91914 [Trichoderma harzianum CBS 226.95])					ENOG41127EI(S:Function unknown); COG0491(S:Function unknown)	ENOG41127EI(-); COG0491(Beta-lactamase domain protein)	PF12680.4(SnoaL_2:SnoaL-like domain)
502763	hypothetical protein	2189	0.57	0	0.00818752	-6.93236	0.00373382	0.0333657	yes	down	XP_024780305.1(hypothetical protein M431DRAFT_502763 [Trichoderma harzianum CBS 226.95])					ENOG410YS6I(S:Function unknown); ENOG410Z749(S:Function unknown)	ENOG410YS6I(-); ENOG410Z749(-)
517376	hypothetical protein	1912	0.665	0	0.00818752	-6.93236	0.00373382	0.0333657	yes	down	PKK53125.1(hypothetical protein CI102_2919 [Trichoderma harzianum])	GO:0016021(cellular_component:integral component of membrane)				ENOG4111Q1Q(S:Function unknown); ENOG410YM2W(S:Function unknown)	ENOG4111Q1Q(Alpha beta hydrolase); ENOG410YM2W(-)
513778	hypothetical protein	2544	192.79	67.97	0.232646	-2.10379	0.0037015	0.0332783	yes	down	XP_024767882.1(hypothetical protein M431DRAFT_513778 [Trichoderma harzianum CBS 226.95])	GO:0016021(cellular_component:integral component of membrane); GO:0016020(cellular_component:membrane)	K14209	SLC36A, PAT	map04138(Autophagy - yeast)	COG0814(U:Intracellular trafficking, secretion, and vesicular transport)	COG0814(NADPH Oxidase)	PF01490.15(Aa_trans:Transmembrane amino acid transporter protein)	sp|P36062|AVT3_YEAST(Vacuolar amino acid transporter 3 OS=Saccharomyces cerevisiae (strain ATCC 204508 / S288c) OX=559292 GN=AVT3 PE=1 SV=1)
73176	hypothetical protein	783	16.18	3.96	0.164449	-2.60428	0.00369842	0.0332783	yes	down	XP_024779971.1(hypothetical protein M431DRAFT_73176 [Trichoderma harzianum CBS 226.95])	GO:0016311(biological_process:dephosphorylation); GO:0035335(biological_process:peptidyl-tyrosine dephosphorylation); GO:0004725(molecular_function:protein tyrosine phosphatase activity); GO:0016791(molecular_function:phosphatase activity)				COG2365(T:Signal transduction mechanisms)	COG2365(protein tyrosine serine phosphatase)	PF13350.3(Y_phosphatase3:Tyrosine phosphatase family); PF00102.24(Y_phosphatase:Protein-tyrosine phosphatase)	sp|Q05918|IPHP_NOSCO(Tyrosine-protein phosphatase OS=Nostoc commune OX=1178 GN=iphP PE=1 SV=1)
478310	hypothetical protein	1320	3.35	0.575	0.113797	-3.13547	0.00370332	0.0332783	yes	down	XP_024778881.1(hypothetical protein M431DRAFT_478310 [Trichoderma harzianum CBS 226.95])	GO:0016810(molecular_function:hydrolase activity, acting on carbon-nitrogen (but not peptide) bonds)				COG1228(O:Posttranslational modification, protein turnover, chaperones); ENOG410YDXI(S:Function unknown)	COG1228(ATPase family associated with various cellular activities (AAA)); ENOG410YDXI(Animal haem peroxidase)	PF01979.17(Amidohydro_1:Amidohydrolase family); PF07969.8(Amidohydro_3:Amidohydrolase family)	sp|P40896|YJV3_YEAST(Uncharacterized protein YJL213W OS=Saccharomyces cerevisiae (strain ATCC 204508 / S288c) OX=559292 GN=YJL213W PE=3 SV=1)
330207	hypothetical protein	2426	14.74	4.225	0.191665	-2.38334	0.00367835	0.0332124	yes	down	XP_024767884.1(hypothetical protein M431DRAFT_330207 [Trichoderma harzianum CBS 226.95])					ENOG41116X7(S:Function unknown)	ENOG41116X7(F-box domain protein)	PF12014.5(DUF3506:Domain of unknown function (DUF3506)); PF12937.4(F-box-like:F-box-like); PF00646.30(F-box:F-box domain)
75245	hypothetical protein	2952	2.45	0.585	0.158619	-2.65636	0.00366953	0.0331867	yes	down	XP_024778441.1(hypothetical protein M431DRAFT_75245 [Trichoderma harzianum CBS 226.95])	GO:0006298(biological_process:mismatch repair); GO:0005524(molecular_function:ATP binding); GO:0030983(molecular_function:mismatched DNA binding)				COG0249(G:Carbohydrate transport and metabolism)	COG0249(alpha-mannosidase)	PF00488.18(MutS_V:MutS domain V); PF05192.15(MutS_III:MutS domain III); PF01624.17(MutS_I:MutS domain I); PF05188.14(MutS_II:MutS domain II)	sp|O13921|MSH1_SCHPO(MutS protein homolog 1 OS=Schizosaccharomyces pombe (strain 972 / ATCC 24843) OX=284812 GN=msh1 PE=3 SV=2)
78055	hypothetical protein	1581	2.535	0.2	0.0522639	-4.25804	0.00367167	0.0331867	yes	down	XP_024778015.1(hypothetical protein M431DRAFT_78055 [Trichoderma harzianum CBS 226.95])	GO:0016021(cellular_component:integral component of membrane); GO:0055085(biological_process:transmembrane transport)				COG0477(K:Transcription)	COG0477(homeobox and C2H2 transcription factor)	PF07690.13(MFS_1:Major Facilitator Superfamily); PF00083.21(Sugar_tr:Sugar (and other) transporter)	sp|O74923|YJ7D_SCHPO(Uncharacterized transporter C757.13 OS=Schizosaccharomyces pombe (strain 972 / ATCC 24843) OX=284812 GN=SPCC757.13 PE=3 SV=1)
95202	hypothetical protein	1779	56.94	18.63	0.212291	-2.23589	0.00364086	0.0330115	yes	down	XP_024770133.1(hypothetical protein M431DRAFT_95202 [Trichoderma harzianum CBS 226.95])	GO:0046835(biological_process:carbohydrate phosphorylation); GO:0003873(molecular_function:6-phosphofructo-2-kinase activity); GO:0006000(biological_process:fructose metabolic process); GO:0005524(molecular_function:ATP binding); GO:0006003(biological_process:fructose 2,6-bisphosphate metabolic process)	K00900	E2.7.1.105, PFK	map00051(Fructose and mannose metabolism)	COG0406(S:Function unknown)	COG0406(ddb1 and cul4 associated factor 13)	PF01591.15(6PF2K:6-phosphofructo-2-kinase); PF00300.19(His_Phos_1:Histidine phosphatase superfamily (branch 1))	sp|P40433|6P21_YEAST(6-phosphofructo-2-kinase 1 OS=Saccharomyces cerevisiae (strain ATCC 204508 / S288c) OX=559292 GN=PFK26 PE=1 SV=1)
77663	hypothetical protein	423	540.31	165.105	0.224547	-2.15491	0.00362022	0.0328587	yes	down	XP_024776933.1(hypothetical protein M431DRAFT_77663 [Trichoderma harzianum CBS 226.95])		K17417	YMR31		ENOG410XX09(S:Function unknown); ENOG4112A3I(S:Function unknown)	ENOG410XX09(Protein of unknown function (DUF2638)); ENOG4112A3I(Conserved hypothetical, protein)	PF10937.5(DUF2638:Protein of unknown function (DUF2638))
16161	hypothetical protein	2137	4.17	1.305	0.186857	-2.41999	0.00361323	0.0328552	yes	down	XP_024775537.1(hypothetical protein M431DRAFT_16161 [Trichoderma harzianum CBS 226.95])	GO:0006355(biological_process:regulation of transcription, DNA-templated)				ENOG410YG8D(S:Function unknown); ENOG4111VV2(S:Function unknown); ENOG4111ZG7(S:Function unknown)	ENOG410YG8D(GAL4); ENOG4111VV2(-); ENOG4111ZG7(Conserved hypothetical, protein)	PF00172.15(Zn_clus:Fungal Zn(2)-Cys(6) binuclear cluster domain)
146589	hypothetical protein	1905	0.7	0	0.00816513	-6.93631	0.00361604	0.0328552	yes	down	XP_024773142.1(hypothetical protein M431DRAFT_146589 [Trichoderma harzianum CBS 226.95])	GO:0006351(biological_process:transcription, DNA-templated); GO:0005634(cellular_component:nucleus); GO:0006357(biological_process:regulation of transcription from RNA polymerase II promoter); GO:0005488(molecular_function:binding); GO:0003677(molecular_function:DNA binding); GO:0000981(molecular_function:RNA polymerase II transcription factor activity, sequence-specific DNA binding); GO:0008270(…				ENOG4110H53(S:Function unknown); ENOG410XQCI(K:Transcription); ENOG410YDYK(S:Function unknown)	ENOG4110H53(-); ENOG410XQCI(Transcription factor); ENOG410YDYK(Transcription factor)	PF00172.15(Zn_clus:Fungal Zn(2)-Cys(6) binuclear cluster domain)
503936	hypothetical protein	1180	7.58	1.3	0.117515	-3.08908	0.00360393	0.0328139	yes	down	XP_024778655.1(hypothetical protein M431DRAFT_503936 [Trichoderma harzianum CBS 226.95])	GO:0016021(cellular_component:integral component of membrane); GO:0055114(biological_process:oxidation-reduction process)				ENOG4112C2X(S:Function unknown)	ENOG4112C2X(cytochrome (b561))	PF03188.13(Cytochrom_B561:Eukaryotic cytochrome b561)
536055	hypothetical protein	2432	0.46	0	0.0090827	-6.78266	0.0035563	0.0324143	yes	down	XP_024767504.1(hypothetical protein M431DRAFT_536055 [Trichoderma harzianum CBS 226.95])					COG0666(S:Function unknown); COG0775(F:Nucleotide transport and metabolism)	COG0666(Ankyrin Repeat); COG0775(Catalyzes the irreversible cleavage of the glycosidic bond in both 5'-methylthioadenosine (MTA) and S- adenosylhomocysteine (SAH AdoHcy) to adenine and the corresponding thioribose, 5'-methylthioribose and S-ribosylhomocysteine, respectively (By similarity))	PF17100.2(NACHT_N:N-terminal domain of NWD NACHT-NTPase); PF05729.9(NACHT:NACHT domain); PF13191.3(AAA_16:AAA ATPase domain); PF13401.3(AAA_22:AAA domain)
484542	hypothetical protein	1509	17.295	4.625	0.182182	-2.45655	0.00354756	0.0323687	yes	down	XP_024771230.1(hypothetical protein M431DRAFT_484542 [Trichoderma harzianum CBS 226.95])	GO:0008171(molecular_function:O-methyltransferase activity); GO:0032259(biological_process:methylation)				ENOG410XS7T(S:Function unknown)	ENOG410XS7T(Conserved hypothetical, protein)	PF00891.15(Methyltransf_2:O-methyltransferase); PF13489.3(Methyltransf_23:Methyltransferase domain); PF13649.3(Methyltransf_25:Methyltransferase domain); PF12847.4(Methyltransf_18:Methyltransferase domain)	sp|D7PI16|GSFB_PENAE(O-methyltransferase gsfB OS=Penicillium aethiopicum OX=36650 GN=gsfB PE=1 SV=1)
482844	hypothetical protein	1233	44.53	9.71	0.149244	-2.74425	0.00354406	0.0323687	yes	down	XP_024773683.1(hypothetical protein M431DRAFT_482844 [Trichoderma harzianum CBS 226.95])	GO:0052654(molecular_function:L-leucine transaminase activity); GO:0052655(molecular_function:L-valine transaminase activity); GO:0052656(molecular_function:L-isoleucine transaminase activity); GO:0009082(biological_process:branched-chain amino acid biosynthetic process)	K00826	E2.6.1.42, ilvE	map00270(Cysteine and methionine metabolism); map00280(Valine, leucine and isoleucine degradation); map00290(Valine, leucine and isoleucine biosynthesis); map00770(Pantothenate and CoA biosynthesis)	COG0115(T:Signal transduction mechanisms)	COG0115(SCY1-like 2 (S. cerevisiae))	PF01063.16(Aminotran_4:Amino-transferase class IV)	sp|P47176|BCA2_YEAST(Branched-chain-amino-acid aminotransferase, cytosolic OS=Saccharomyces cerevisiae (strain ATCC 204508 / S288c) OX=559292 GN=BAT2 PE=1 SV=1)
86552	hypothetical protein	1527	3.125	0.365	0.0780474	-3.67951	0.00352781	0.0322564	yes	down	XP_024773267.1(hypothetical protein M431DRAFT_86552 [Trichoderma harzianum CBS 226.95])	GO:0022891(molecular_function:substrate-specific transmembrane transporter activity); GO:0016021(cellular_component:integral component of membrane); GO:0055085(biological_process:transmembrane transport)				ENOG410XNQK(G:Carbohydrate transport and metabolism); ENOG41113U3(S:Function unknown)	ENOG410XNQK(hydrolase family 3); ENOG41113U3(Sugar (and other) transporter)	PF00083.21(Sugar_tr:Sugar (and other) transporter); PF07690.13(MFS_1:Major Facilitator Superfamily); PF06779.11(MFS_4:Uncharacterised MFS-type transporter YbfB); PF06609.10(TRI12:Fungal trichothecene efflux pump (TRI12))	sp|P07921|LACP_KLULA(Lactose permease OS=Kluyveromyces lactis (strain ATCC 8585 / CBS 2359 / DSM 70799 / NBRC 1267 / NRRL Y-1140 / WM37) OX=284590 GN=LAC12 PE=3 SV=1)
82172	hypothetical protein	2124	74.455	21.965	0.198644	-2.33174	0.00349155	0.0319585	yes	down	XP_024776097.1(hypothetical protein M431DRAFT_82172 [Trichoderma harzianum CBS 226.95])	GO:0046983(molecular_function:protein dimerization activity)				ENOG410YEP0(K:Transcription)	ENOG410YEP0(Transcription factor)	PF00010.23(HLH:Helix-loop-helix DNA-binding domain)	sp|P20824|NUC1_NEUCR(Phosphorus acquisition-controlling protein OS=Neurospora crassa (strain ATCC 24698 / 74-OR23-1A / CBS 708.71 / DSM 1257 / FGSC 987) OX=367110 GN=nuc-1 PE=3 SV=2)
70698	hypothetical protein	1440	2.82	0.36	0.084841	-3.5591	0.00347577	0.0318477	yes	down	PKK51495.1(hypothetical protein CI102_5025 [Trichoderma harzianum])	GO:0005215(molecular_function:transporter activity); GO:0016021(cellular_component:integral component of membrane); GO:0004396(molecular_function:hexokinase activity); GO:0005623(cellular_component:cell); GO:0006096(biological_process:glycolytic process); GO:0046835(biological_process:carbohydrate phosphorylation); GO:0001678(biological_process:cellular glucose homeostasis); GO:0055085(biological…				ENOG410XNQK(K:Transcription)	ENOG410XNQK(Myblike DNAbinding domain containing protein)	PF07690.13(MFS_1:Major Facilitator Superfamily); PF00083.21(Sugar_tr:Sugar (and other) transporter); PF06609.10(TRI12:Fungal trichothecene efflux pump (TRI12))	sp|Q09752|FNX1_SCHPO(Multidrug resistance protein fnx1 OS=Schizosaccharomyces pombe (strain 972 / ATCC 24843) OX=284812 GN=fnx1 PE=2 SV=2)
1403	hypothetical protein	555	2930.11	984.84	0.230096	-2.11969	0.00346672	0.0317985	yes	down	XP_024778354.1(hypothetical protein M431DRAFT_1403 [Trichoderma harzianum CBS 226.95])					ENOG410Y0S1(S:Function unknown)	ENOG410Y0S1(Chitin synthesis regulation, resistance to Congo red)	PF12273.5(RCR:Chitin synthesis regulation, resistance to Congo red)
111130	hypothetical protein	1911	62.7	17.595	0.179764	-2.47582	0.00342197	0.0314212	yes	down	XP_024775993.1(hypothetical protein M431DRAFT_111130 [Trichoderma harzianum CBS 226.95])	GO:0016021(cellular_component:integral component of membrane); GO:0016020(cellular_component:membrane)				ENOG410XR8H(S:Function unknown)	ENOG410XR8H(Spermine spermidine synthase family protein)	PF01564.14(Spermine_synth:Spermine/spermidine synthase); PF13489.3(Methyltransf_23:Methyltransferase domain)	sp|Q8D3Q3|SPEE_VIBVU(Polyamine aminopropyltransferase OS=Vibrio vulnificus (strain CMCP6) OX=216895 GN=speE PE=3 SV=1)
385686	hypothetical protein	2436	141	46.54	0.218969	-2.1912	0.00339833	0.0312704	yes	down	XP_024776413.1(hypothetical protein M431DRAFT_385686 [Trichoderma harzianum CBS 226.95])	GO:0016310(biological_process:phosphorylation); GO:0005829(cellular_component:cytosol); GO:0005524(molecular_function:ATP binding); GO:0035299(molecular_function:inositol pentakisphosphate 2-kinase activity); GO:0032958(biological_process:inositol phosphate biosynthetic process)	K19786	IPK1	map04070(Phosphatidylinositol signaling system); map00562(Inositol phosphate metabolism)	ENOG411295H(S:Function unknown)	ENOG411295H(Conserved hypothetical, protein)	PF06090.9(Ins_P5_2-kin:Inositol-pentakisphosphate 2-kinase)	sp|Q6C6Q7|IPK1_YARLI(Inositol-pentakisphosphate 2-kinase OS=Yarrowia lipolytica (strain CLIB 122 / E 150) OX=284591 GN=IPK1 PE=3 SV=1)
4285	hypothetical protein	2157	9.585	1.835	0.121966	-3.03545	0.00338925	0.0312445	yes	down	XP_024776894.1(hypothetical protein M431DRAFT_4285 [Trichoderma harzianum CBS 226.95])	GO:0005634(cellular_component:nucleus); GO:0008270(molecular_function:zinc ion binding); GO:0006351(biological_process:transcription, DNA-templated); GO:0003677(molecular_function:DNA binding)				ENOG410XQPD(K:Transcription)	ENOG410XQPD(Transcription factor)	PF04082.15(Fungal_trans:Fungal specific transcription factor domain)
132953	hypothetical protein	1185	1.905	0.125	0.0413766	-4.59504	0.00339191	0.0312445	yes	down	XP_024778189.1(hypothetical protein M431DRAFT_132953 [Trichoderma harzianum CBS 226.95])					ENOG410YXGX(S:Function unknown); ENOG4111B8M(S:Function unknown)	ENOG410YXGX(-); ENOG4111B8M(-)	PF11951.5(Fungal_trans_2:Fungal specific transcription factor domain)
83077	hypothetical protein	1890	195.73	63.5	0.217913	-2.19818	0.00337013	0.0311432	yes	down	XP_024775018.1(hypothetical protein M431DRAFT_83077 [Trichoderma harzianum CBS 226.95])	GO:0004674(molecular_function:protein serine/threonine kinase activity); GO:0006468(biological_process:protein phosphorylation); GO:0005524(molecular_function:ATP binding); GO:0004672(molecular_function:protein kinase activity)				ENOG410XP9G(T:Signal transduction mechanisms)	ENOG410XP9G(mitogen-activated protein kinase kinase kinase kinase)	PF00069.22(Pkinase:Protein kinase domain); PF07714.14(Pkinase_Tyr:Protein tyrosine kinase); PF14531.3(Kinase-like:Kinase-like)	sp|Q9Y884|SKH1_SCHPO(MAP kinase kinase skh1/pek1 OS=Schizosaccharomyces pombe (strain 972 / ATCC 24843) OX=284812 GN=skh1 PE=3 SV=1)
511021	hypothetical protein	1055	192.215	68.305	0.235034	-2.08906	0.00334769	0.0309688	yes	down	XP_024771542.1(hypothetical protein M431DRAFT_511021 [Trichoderma harzianum CBS 226.95])					COG0393(S:Function unknown)	COG0393(UPF0145 protein)	PF01906.14(YbjQ_1:Putative heavy-metal-binding)	sp|A0LWS1|Y2109_ACIC1(UPF0145 protein Acel_2109 OS=Acidothermus cellulolyticus (strain ATCC 43068 / 11B) OX=351607 GN=Acel_2109 PE=3 SV=1)
477461	hypothetical protein	1992	142.885	48.015	0.2292	-2.12532	0.00332734	0.0308464	yes	down	XP_024780747.1(hypothetical protein M431DRAFT_477461 [Trichoderma harzianum CBS 226.95])					ENOG410YQH4(S:Function unknown)	ENOG410YQH4(phosphoglycerate mutase family protein)	PF00300.19(His_Phos_1:Histidine phosphatase superfamily (branch 1))
123111	hypothetical protein	1672	1.73	0.08	0.0310847	-5.00765	0.0033255	0.0308464	yes	down	XP_024771100.1(hypothetical protein M431DRAFT_123111 [Trichoderma harzianum CBS 226.95])	GO:0016021(cellular_component:integral component of membrane); GO:0055085(biological_process:transmembrane transport)				COG0477(F:Nucleotide transport and metabolism)	COG0477(deaminase)	PF07690.13(MFS_1:Major Facilitator Superfamily)	sp|O94343|YHMA_SCHPO(Uncharacterized MFS-type transporter C1271.10c OS=Schizosaccharomyces pombe (strain 972 / ATCC 24843) OX=284812 GN=SPBC1271.10c PE=1 SV=1)
3731	GMC oxidoreductase	2217	56.28	15.255	0.189105	-2.40274	0.00330523	0.0307071	yes	down	XP_024776258.1(GMC oxidoreductase [Trichoderma harzianum CBS 226.95])	GO:0050660(molecular_function:flavin adenine dinucleotide binding); GO:0016614(molecular_function:oxidoreductase activity, acting on CH-OH group of donors); GO:0055114(biological_process:oxidation-reduction process)				COG2303(T:Signal transduction mechanisms)	COG2303(Phosphodiesterase)	PF00732.16(GMC_oxred_N:GMC oxidoreductase); PF05199.10(GMC_oxred_C:GMC oxidoreductase); PF00890.21(FAD_binding_2:FAD binding domain); PF07992.11(Pyr_redox_2:Pyridine nucleotide-disulphide oxidoreductase); PF13450.3(NAD_binding_8:NAD(P)-binding Rossmann-like domain); PF01494.16(FAD_binding_3:FAD binding domain); PF03486.11(HI0933_like:HI0933-like protein)	sp|B5WWZ9|FAO2_LOTJA(Long-chain-alcohol oxidase FAO2 OS=Lotus japonicus OX=34305 GN=FAO2 PE=2 SV=1)
85329	hypothetical protein	2292	11.415	3.415	0.190835	-2.3896	0.0032329	0.030132	yes	down	PKK43798.1(hypothetical protein CI102_11033 [Trichoderma harzianum])					ENOG410XXQY(S:Function unknown); ENOG4110V02(S:Function unknown)	ENOG410XXQY(-); ENOG4110V02(-)	PF10214.6(Rrn6:RNA polymerase I-specific transcription-initiation factor)
97565	hypothetical protein	3882	514.055	111.65	0.169765	-2.55839	0.00321417	0.0299897	yes	down	XP_024769098.1(hypothetical protein M431DRAFT_97565 [Trichoderma harzianum CBS 226.95])	GO:0042626(molecular_function:ATPase activity, coupled to transmembrane movement of substances); GO:0016021(cellular_component:integral component of membrane); GO:0055085(biological_process:transmembrane transport); GO:0005524(molecular_function:ATP binding)	K05658	ABCB1, CD243	map02010(ABC transporters)	COG1132(S:Function unknown)	COG1132(-)	PF00664.20(ABC_membrane:ABC transporter transmembrane region); PF00005.24(ABC_tran:ABC transporter); PF02463.16(SMC_N:RecF/RecN/SMC N terminal domain); PF13555.3(AAA_29:P-loop containing region of AAA domain); PF13401.3(AAA_22:AAA domain); PF06414.9(Zeta_toxin:Zeta toxin); PF03193.13(DUF258:Protein of unknown function, DUF258)	sp|P21449|MDR2_CRIGR(Multidrug resistance protein 2 OS=Cricetulus griseus OX=10029 GN=PGY2 PE=2 SV=2)
120411	hypothetical protein	1129	1.21	0	0.00862945	-6.85651	0.00320304	0.0299504	yes	down	XP_024771681.1(hypothetical protein M431DRAFT_120411 [Trichoderma harzianum CBS 226.95])					ENOG410YJFB(S:Function unknown); ENOG410YI5U(S:Function unknown); ENOG410YN7E(S:Function unknown); ENOG410Y0EI(S:Function unknown); COG0507(L:Replication, recombination and repair)	ENOG410YJFB(-); ENOG410YI5U(-); ENOG410YN7E(-); ENOG410Y0EI(C6 finger domain protein); COG0507(exodeoxyribonuclease v alpha)
509353	hypothetical protein	1399	0.92	0	0.00862945	-6.85651	0.00320304	0.0299504	yes	down	XP_024774034.1(hypothetical protein M431DRAFT_509353 [Trichoderma harzianum CBS 226.95])					ENOG410ZH3M(S:Function unknown)	ENOG410ZH3M(-)
104176	hypothetical protein	912	1.35	0	0.00919456	-6.765	0.00318603	0.0298852	yes	down	XP_024780254.1(hypothetical protein M431DRAFT_104176 [Trichoderma harzianum CBS 226.95])					ENOG410XT0K(B:Chromatin structure and dynamics); ENOG410XUWN(B:Chromatin structure and dynamics); ENOG411009V(B:Chromatin structure and dynamics)	ENOG410XT0K(SRY (Sex determining region Y)-box); ENOG410XUWN(Transcription factor); ENOG411009V(SRY (sex determining region Y)-box 2)	PF00505.16(HMG_box:HMG (high mobility group) box); PF09011.7(HMG_box_2:HMG-box domain)	sp|P35693|FPR1_PODAS(MAT+ sexual cell fertilization-promoting factor OS=Podospora anserina OX=5145 GN=FPR1 PE=3 SV=2)
488897	GMC oxidoreductase	1500	2.875	0.395	0.0896825	-3.47903	0.00317753	0.0298406	yes	down	XP_024779811.1(GMC oxidoreductase [Trichoderma harzianum CBS 226.95])	GO:0050660(molecular_function:flavin adenine dinucleotide binding); GO:0016614(molecular_function:oxidoreductase activity, acting on CH-OH group of donors); GO:0055114(biological_process:oxidation-reduction process)				COG2303(F:Nucleotide transport and metabolism)	COG2303(Catalyzes the irreversible cleavage of the glycosidic bond in both 5'-methylthioadenosine (MTA) and S- adenosylhomocysteine (SAH AdoHcy) to adenine and the corresponding thioribose, 5'-methylthioribose and S-ribosylhomocysteine, respectively (By similarity))	PF00732.16(GMC_oxred_N:GMC oxidoreductase); PF05199.10(GMC_oxred_C:GMC oxidoreductase); PF01266.21(DAO:FAD dependent oxidoreductase); PF00890.21(FAD_binding_2:FAD binding domain); PF13450.3(NAD_binding_8:NAD(P)-binding Rossmann-like domain); PF05834.9(Lycopene_cycl:Lycopene cyclase protein); PF07992.11(Pyr_redox_2:Pyridine nucleotide-disulphide oxidoreductase)	sp|Q6UPE0|CHDH_RAT(Choline dehydrogenase, mitochondrial OS=Rattus norvegicus OX=10116 GN=Chdh PE=1 SV=1)
507229	hypothetical protein	2334	9.56	2.74	0.189783	-2.39758	0.0031734	0.0298341	yes	down	XP_024775232.1(hypothetical protein M431DRAFT_507229 [Trichoderma harzianum CBS 226.95])	GO:0050660(molecular_function:flavin adenine dinucleotide binding); GO:0016614(molecular_function:oxidoreductase activity, acting on CH-OH group of donors); GO:0055114(biological_process:oxidation-reduction process)				ENOG410XT36(S:Function unknown); COG0277(S:Function unknown)	ENOG410XT36(FAD FMN-containing isoamyl alcohol oxidase MreA); COG0277(FAD FMN-containing isoamyl alcohol oxidase MreA)	PF01565.20(FAD_binding_4:FAD binding domain); PF08031.9(BBE:Berberine and berberine like)	sp|A0A0E0RTV6|ZEB1_GIBZE(FAD-linked oxidoreductase ZEB1 OS=Gibberella zeae (strain PH-1 / ATCC MYA-4620 / FGSC 9075 / NRRL 31084) OX=229533 GN=ZEB1 PE=2 SV=2)
72652	hypothetical protein	1371	9.08	1.985	0.146535	-2.77068	0.00315715	0.0297135	yes	down	XP_024780936.1(hypothetical protein M431DRAFT_72652 [Trichoderma harzianum CBS 226.95])	GO:0016311(biological_process:dephosphorylation); GO:0003993(molecular_function:acid phosphatase activity)				ENOG4111FS8(S:Function unknown)	ENOG4111FS8(PHOsphatase)	PF00328.19(His_Phos_2:Histidine phosphatase superfamily (branch 2))	sp|Q9C1T1|PHYA_ASPOR(3-phytase A OS=Aspergillus oryzae (strain ATCC 42149 / RIB 40) OX=510516 GN=phyA PE=2 SV=1)
127647	hypothetical protein	1951	1.44	0.155	0.0667805	-3.90443	0.00315336	0.0297101	yes	down	XP_024768350.1(hypothetical protein M431DRAFT_127647 [Trichoderma harzianum CBS 226.95])	GO:0016021(cellular_component:integral component of membrane); GO:0055085(biological_process:transmembrane transport)				COG0477(S:Function unknown); ENOG4110PC4(S:Function unknown); ENOG411010Y(G:Carbohydrate transport and metabolism); ENOG4111FC0(G:Carbohydrate transport and metabolism); ENOG410ZVRQ(G:Carbohydrate transport and metabolism); ENOG410XRM2(G:Carbohydrate transport and metabolism)	COG0477(Transferase); ENOG4110PC4(Transferase); ENOG411010Y(Major Facilitator Superfamily); ENOG4111FC0(Major Facilitator Superfamily); ENOG410ZVRQ(Major Facilitator Superfamily); ENOG410XRM2(major facilitator superfamily)	PF07690.13(MFS_1:Major Facilitator Superfamily)	sp|O15427|MOT4_HUMAN(Monocarboxylate transporter 4 OS=Homo sapiens OX=9606 GN=SLC16A3 PE=1 SV=1)
101161	hypothetical protein	1317	11.47	2.35	0.132388	-2.91716	0.00314301	0.0296448	yes	down	XP_024767583.1(hypothetical protein M431DRAFT_101161 [Trichoderma harzianum CBS 226.95])		K11365	SGF73		ENOG4111P7B(S:Function unknown)	ENOG4111P7B(Ataxin 7-like 1)	PF13472.3(Lipase_GDSL_2:GDSL-like Lipase/Acylhydrolase family); PF00657.19(Lipase_GDSL:GDSL-like Lipase/Acylhydrolase)	sp|Q9S2A5|LIP1_STRCO(Lipase 1 OS=Streptomyces coelicolor (strain ATCC BAA-471 / A3(2) / M145) OX=100226 GN=SCO1725 PE=1 SV=1)
81097	hypothetical protein	1086	404.385	148.5	0.239843	-2.05984	0.00311254	0.0294536	yes	down	XP_024776562.1(hypothetical protein M431DRAFT_81097 [Trichoderma harzianum CBS 226.95])	GO:0016020(cellular_component:membrane); GO:0005794(cellular_component:Golgi apparatus); GO:0016021(cellular_component:integral component of membrane); GO:0006890(biological_process:retrograde vesicle-mediated transport, Golgi to ER); GO:0005622(cellular_component:intracellular)				ENOG410XQM0(S:Function unknown)	ENOG410XQM0(Transmembrane protein 115)	PF08551.7(DUF1751:Eukaryotic integral membrane protein (DUF1751))	sp|A4FUB8|TM115_BOVIN(Transmembrane protein 115 OS=Bos taurus OX=9913 GN=TMEM115 PE=2 SV=1)
495839	hypothetical protein	2250	11.735	6.31	0.36938	-1.4368	0.00264	0.02937	yes	down	XP_024773562.1(hypothetical protein M431DRAFT_495839 [Trichoderma harzianum CBS 226.95])	GO:0005634(cellular_component:nucleus); GO:0006355(biological_process:regulation of transcription, DNA-templated); GO:0008270(molecular_function:zinc ion binding); GO:0003677(molecular_function:DNA binding); GO:0046872(molecular_function:metal ion binding); GO:0006351(biological_process:transcription, DNA-templated)				ENOG4110W9I(S:Function unknown); ENOG410YESX(S:Function unknown); ENOG4110XPN(S:Function unknown)	ENOG4110W9I(Fungal specific transcription factor domain); ENOG410YESX(Fungal specific transcription factor domain); ENOG4110XPN(Fungal specific transcription factor domain)	PF00172.15(Zn_clus:Fungal Zn(2)-Cys(6) binuclear cluster domain); PF04082.15(Fungal_trans:Fungal specific transcription factor domain)	sp|P52959|CTF1B_FUSSO(Cutinase transcription factor 1 beta OS=Fusarium solani subsp. pisi OX=70791 GN=CTF1-BETA PE=2 SV=1)
489245	hypothetical protein	651	40.325	10.68	0.175871	-2.50741	0.00307661	0.0292413	yes	down	XP_024780157.1(hypothetical protein M431DRAFT_489245 [Trichoderma harzianum CBS 226.95])	GO:0000166(molecular_function:nucleotide binding); GO:0016020(cellular_component:membrane); GO:0003924(molecular_function:GTPase activity); GO:0005622(cellular_component:intracellular); GO:0007165(biological_process:signal transduction); GO:0005886(cellular_component:plasma membrane); GO:0005935(cellular_component:cellular bud neck); GO:0007264(biological_process:small GTPase mediated signal tran…				COG1100(S:Function unknown)	COG1100(GTP-binding Protein)	PF00071.19(Ras:Ras family); PF08477.10(Roc:Ras of Complex, Roc, domain of DAPkinase); PF00025.18(Arf:ADP-ribosylation factor family); PF00009.24(GTP_EFTU:Elongation factor Tu GTP binding domain); PF01926.20(MMR_HSR1:50S ribosome-binding GTPase)	sp|P52498|RSR1_CANAX(Ras-related protein RSR1 OS=Candida albicans OX=5476 GN=RSR1 PE=3 SV=1)
71741	hypothetical protein	1539	29.6	8.605	0.198997	-2.32918	0.00306536	0.0292244	yes	down	PKK51109.1(hypothetical protein CI102_5919 [Trichoderma harzianum])					ENOG4112BCH(S:Function unknown)	ENOG4112BCH(-)	PF15463.3(ECM11:Extracellular mutant protein 11)
532049	glycosyltransferase family 69 protein	1506	2.795	0.455	0.108041	-3.21035	0.00305851	0.0291973	yes	down	XP_024772878.1(glycosyltransferase family 69 protein [Trichoderma harzianum CBS 226.95])	GO:0016740(molecular_function:transferase activity)	K13690	CMT1		ENOG410XSYA(S:Function unknown); ENOG41102Z0(S:Function unknown)	ENOG410XSYA(Cryptococcal mannosyltransferase 1); ENOG41102Z0(Cryptococcal mannosyltransferase 1)	PF11735.5(CAP59_mtransfer:Cryptococcal mannosyltransferase 1)	sp|Q6U1Z4|CMT1_CRYNJ(Alpha-1,3-mannosyltransferase CMT1 OS=Cryptococcus neoformans var. neoformans serotype D (strain JEC21 / ATCC MYA-565) OX=214684 GN=CMT1 PE=1 SV=1)
505241	hypothetical protein	1068	11.56	1.855	0.107991	-3.21102	0.00304587	0.0291409	yes	down	XP_024777345.1(hypothetical protein M431DRAFT_505241 [Trichoderma harzianum CBS 226.95])	GO:0015035(molecular_function:protein disulfide oxidoreductase activity); GO:0055114(biological_process:oxidation-reduction process)				COG2761(Q:Secondary metabolites biosynthesis, transport and catabolism)	COG2761(DSBA oxidoreductase)	PF01323.17(DSBA:DSBA-like thioredoxin domain)
489903	hypothetical protein	3090	127.79	43.265	0.226729	-2.14096	0.00300163	0.028813	yes	down	XP_024780811.1(hypothetical protein M431DRAFT_489903 [Trichoderma harzianum CBS 226.95])	GO:0006893(biological_process:Golgi to plasma membrane transport); GO:0000145(cellular_component:exocyst); GO:0000131(cellular_component:incipient cellular bud site); GO:0048309(biological_process:endoplasmic reticulum inheritance); GO:0005935(cellular_component:cellular bud neck); GO:0005934(cellular_component:cellular bud tip); GO:0001927(biological_process:exocyst assembly)	K17637	EXOC2, SEC5		ENOG410XSY3(S:Function unknown)	ENOG410XSY3(exocytosis)	PF15469.3(Sec5:Exocyst complex component Sec5); PF08700.8(Vps51:Vps51/Vps67)	sp|P89102|SEC5_YEAST(Exocyst complex component SEC5 OS=Saccharomyces cerevisiae (strain ATCC 204508 / S288c) OX=559292 GN=SEC5 PE=1 SV=1)
94713	hypothetical protein	1878	3.89	0.29	0.0642619	-3.95989	0.00298694	0.0287154	yes	down	XP_024770575.1(hypothetical protein M431DRAFT_94713 [Trichoderma harzianum CBS 226.95])					ENOG4110WVJ(S:Function unknown); ENOG410YF5I(S:Function unknown); ENOG4110VDP(S:Function unknown)	ENOG4110WVJ(-); ENOG410YF5I(-); ENOG4110VDP(Fungal Zn(2)-Cys(6) binuclear cluster domain)
2550	hypothetical protein	1107	1.795	0.045	0.0162559	-5.9429	0.00298815	0.0287154	yes	down	XP_024777101.1(hypothetical protein M431DRAFT_2550 [Trichoderma harzianum CBS 226.95])					ENOG410XTJZ(S:Function unknown); ENOG41100TU(S:Function unknown); COG0702(G:Carbohydrate transport and metabolism); COG0702(M:Cell wall/membrane/envelope biogenesis)	ENOG410XTJZ(NmrA-like family); ENOG41100TU(NmrA Family); COG0702(epimerase dehydratase); COG0702(epimerase dehydratase)	PF05368.10(NmrA:NmrA-like family)	sp|Q8K2T1|NMRL1_MOUSE(NmrA-like family domain-containing protein 1 OS=Mus musculus OX=10090 GN=Nmral1 PE=1 SV=1)
526309	hypothetical protein	1509	61.51	10.29	0.115108	-3.11894	0.00297513	0.0286538	yes	down	XP_024779750.1(hypothetical protein M431DRAFT_526309 [Trichoderma harzianum CBS 226.95])	GO:0004806(molecular_function:triglyceride lipase activity); GO:0016042(biological_process:lipid catabolic process)				ENOG4111H5Y(O:Posttranslational modification, protein turnover, chaperones)	ENOG4111H5Y(Secretory lipase)	PF03583.11(LIP:Secretory lipase)	sp|D4AX63|LIPA_ARTBC(Lipase A OS=Arthroderma benhamiae (strain ATCC MYA-4681 / CBS 112371) OX=663331 GN=ARB_00790 PE=3 SV=1)
84165	hypothetical protein	2796	19.83	6.005	0.205808	-2.28063	0.00295056	0.0284805	yes	down	XP_024775689.1(hypothetical protein M431DRAFT_84165 [Trichoderma harzianum CBS 226.95])	GO:0005634(cellular_component:nucleus); GO:0008270(molecular_function:zinc ion binding); GO:0006351(biological_process:transcription, DNA-templated); GO:0003677(molecular_function:DNA binding)				COG5048(S:Function unknown)	COG5048(Chromodomain protein)	PF04082.15(Fungal_trans:Fungal specific transcription factor domain); PF00096.23(zf-C2H2:Zinc finger, C2H2 type); PF13894.3(zf-C2H2_4:C2H2-type zinc finger); PF13465.3(zf-H2C2_2:Zinc-finger double domain)	sp|Q5AF56|ADR1_CANAL(Transcriptional regulator ADR1 OS=Candida albicans (strain SC5314 / ATCC MYA-2876) OX=237561 GN=ADR1 PE=2 SV=2)
482068	hypothetical protein	4599	85.295	21.49	0.180165	-2.47261	0.00291489	0.0282125	yes	down	XP_024774561.1(hypothetical protein M431DRAFT_482068 [Trichoderma harzianum CBS 226.95])					ENOG410ZS2W(S:Function unknown); ENOG410XSTY(S:Function unknown); ENOG410XP6K(S:Function unknown)	ENOG410ZS2W(-); ENOG410XSTY(Latent transforming growth factor beta binding protein 2); ENOG410XP6K(Notch ligand involved in the mediation of Notch signaling (By similarity))	PF10528.6(PA14_2:GLEYA domain); PF04706.9(Dickkopf_N:Dickkopf N-terminal cysteine-rich region)	sp|P98166|VLDLR_RAT(Very low-density lipoprotein receptor OS=Rattus norvegicus OX=10116 GN=Vldlr PE=2 SV=1)
143714	hypothetical protein	2210	2.545	0.47	0.115308	-3.11644	0.00286125	0.0279115	yes	down	XP_024774809.1(hypothetical protein M431DRAFT_143714 [Trichoderma harzianum CBS 226.95])	GO:0005215(molecular_function:transporter activity); GO:0016021(cellular_component:integral component of membrane); GO:0055085(biological_process:transmembrane transport); GO:0000329(cellular_component:fungal-type vacuole membrane)				ENOG410XSE0(S:Function unknown)	ENOG410XSE0(Conserved hypothetical, protein)	PF07690.13(MFS_1:Major Facilitator Superfamily); PF00083.21(Sugar_tr:Sugar (and other) transporter)	sp|P25351|YCR3_YEAST(Uncharacterized membrane protein YCR023C OS=Saccharomyces cerevisiae (strain ATCC 204508 / S288c) OX=559292 GN=YCR023C PE=1 SV=2)
513728	hypothetical protein	1180	2.94	0.17	0.0433722	-4.52709	0.00287229	0.0279115	yes	down	XP_024767980.1(hypothetical protein M431DRAFT_513728 [Trichoderma harzianum CBS 226.95])
126834	hypothetical protein	2401	1.38	0.075	0.0367328	-4.76679	0.00287055	0.0279115	yes	down	XP_024768783.1(hypothetical protein M431DRAFT_126834 [Trichoderma harzianum CBS 226.95])	GO:0006351(biological_process:transcription, DNA-templated); GO:0005634(cellular_component:nucleus); GO:0006357(biological_process:regulation of transcription from RNA polymerase II promoter); GO:0005488(molecular_function:binding); GO:0003677(molecular_function:DNA binding); GO:0000981(molecular_function:RNA polymerase II transcription factor activity, sequence-specific DNA binding); GO:0008270(…				ENOG410ZJD4(S:Function unknown); ENOG4111F28(S:Function unknown)	ENOG410ZJD4(-); ENOG4111F28(Fungal specific transcription factor domain)	PF04082.15(Fungal_trans:Fungal specific transcription factor domain); PF00172.15(Zn_clus:Fungal Zn(2)-Cys(6) binuclear cluster domain)	sp|Q1ERI1|CTNR_MONPU(Citrinin biosynthesis transcriptional activator ctnR OS=Monascus purpureus OX=5098 GN=ctnR PE=3 SV=1)
8407	hypothetical protein	507	5.135	0	0.00843775	-6.88893	0.00286928	0.0279115	yes	down	XP_024770837.1(hypothetical protein M431DRAFT_8407 [Trichoderma harzianum CBS 226.95])
494202	hypothetical protein	1257	1568.12	624.29	0.22743	-2.13651	0.00281945	0.027609	yes	down	XP_024775445.1(hypothetical protein M431DRAFT_494202 [Trichoderma harzianum CBS 226.95])					ENOG411145S(S:Function unknown); ENOG4110VHV(S:Function unknown)	ENOG411145S(Conserved hypothetical, protein); ENOG4110VHV(-)
81893	hypothetical protein	3231	155.54	38.525	0.175547	-2.51007	0.002821	0.027609	yes	down	XP_024776809.1(hypothetical protein M431DRAFT_81893 [Trichoderma harzianum CBS 226.95])	GO:0070330(molecular_function:aromatase activity); GO:0020037(molecular_function:heme binding); GO:0003958(molecular_function:NADPH-hemoprotein reductase activity); GO:0010181(molecular_function:FMN binding); GO:0005506(molecular_function:iron ion binding); GO:0055114(biological_process:oxidation-reduction process)	K14338	cypD_E, CYP102A2_3	map00071(Fatty acid degradation); map00380(Tryptophan metabolism)	COG2124(U:Intracellular trafficking, secretion, and vesicular transport); COG0369(U:Intracellular trafficking, secretion, and vesicular transport)	COG2124(Beta-lactamase); COG0369(Beta-lactamase)	PF00067.19(p450:Cytochrome P450); PF00667.17(FAD_binding_1:FAD binding domain); PF00258.22(Flavodoxin_1:Flavodoxin); PF00175.18(NAD_binding_1:Oxidoreductase NAD-binding domain)	sp|Q9Y8G7|C505_FUSOX(Bifunctional cytochrome P450/NADPH--P450 reductase OS=Fusarium oxysporum OX=5507 GN=CYP505 PE=1 SV=1)
78486	hypothetical protein	1152	6.715	0.57	0.0596772	-4.06668	0.00281696	0.027609	yes	down	XP_024777048.1(hypothetical protein M431DRAFT_78486 [Trichoderma harzianum CBS 226.95])	GO:0008270(molecular_function:zinc ion binding); GO:0055114(biological_process:oxidation-reduction process); GO:0016491(molecular_function:oxidoreductase activity)				COG1063(S:Function unknown)	COG1063(gpr1 fun34 YaaH family protein)	PF08240.9(ADH_N:Alcohol dehydrogenase GroES-like domain); PF00107.23(ADH_zinc_N:Zinc-binding dehydrogenase); PF13823.3(ADH_N_assoc:Alcohol dehydrogenase GroES-associated)	sp|Q9HTE3|FADH_PSEAE(Glutathione-independent formaldehyde dehydrogenase OS=Pseudomonas aeruginosa (strain ATCC 15692 / DSM 22644 / CIP 104116 / JCM 14847 / LMG 12228 / 1C / PRS 101 / PAO1) OX=208964 GN=fdhA PE=3 SV=1)
89227	hypothetical protein	1668	376.275	72.17	0.132749	-2.91323	0.00280838	0.0275998	yes	down	XP_024773084.1(hypothetical protein M431DRAFT_89227 [Trichoderma harzianum CBS 226.95])	GO:0022891(molecular_function:substrate-specific transmembrane transporter activity); GO:0016021(cellular_component:integral component of membrane); GO:0055085(biological_process:transmembrane transport)				ENOG410XNQK(E:Amino acid transport and metabolism)	ENOG410XNQK(histidinol-phosphatase activity)	PF00083.21(Sugar_tr:Sugar (and other) transporter); PF07690.13(MFS_1:Major Facilitator Superfamily)	sp|A2QQV6|QUTD_ASPNC(Probable quinate permease OS=Aspergillus niger (strain CBS 513.88 / FGSC A1513) OX=425011 GN=qutD PE=3 SV=1)
528715	hypothetical protein	941	1.55	0	0.00869709	-6.84525	0.00279097	0.027491	yes	down	XP_024777550.1(hypothetical protein M431DRAFT_528715 [Trichoderma harzianum CBS 226.95])	GO:0016021(cellular_component:integral component of membrane); GO:0016020(cellular_component:membrane); GO:0006950(biological_process:response to stress)				ENOG410ZGEK(S:Function unknown); ENOG4111IED(S:Function unknown)	ENOG410ZGEK(RTA1 like protein); ENOG4111IED(RTA1 like protein)	PF04479.10(RTA1:RTA1 like protein)	sp|O13780|YEO2_SCHPO(Uncharacterized protein C17G6.02c OS=Schizosaccharomyces pombe (strain 972 / ATCC 24843) OX=284812 GN=SPAC17G6.02c PE=4 SV=1)
504546	hypothetical protein	2606	649.755	208	0.219187	-2.18977	0.00277515	0.0273664	yes	down	XP_024779264.1(hypothetical protein M431DRAFT_504546 [Trichoderma harzianum CBS 226.95])	GO:0007126(biological_process:meiotic nuclear division); GO:0000122(biological_process:negative regulation of transcription from RNA polymerase II promoter); GO:0005634(cellular_component:nucleus); GO:0000917(biological_process:barrier septum assembly); GO:0009272(biological_process:fungal-type cell wall biogenesis); GO:0030437(biological_process:ascospore formation); GO:0045944(biological_proces…				COG5048(S:Function unknown)	COG5048(Conserved hypothetical, protein)	PF00096.23(zf-C2H2:Zinc finger, C2H2 type); PF13894.3(zf-C2H2_4:C2H2-type zinc finger); PF13465.3(zf-H2C2_2:Zinc-finger double domain); PF12171.5(zf-C2H2_jaz:Zinc-finger double-stranded RNA-binding)	sp|Q873X0|PACC_GIBMO(pH-response transcription factor pacC/RIM101 OS=Gibberella moniliformis OX=117187 GN=PAC1 PE=3 SV=1)
507955	glycoside hydrolase family 95 protein	2724	2.32	0.395	0.116735	-3.0987	0.00276462	0.0272935	yes	down	XP_024774209.1(glycoside hydrolase family 95 protein [Trichoderma harzianum CBS 226.95])	GO:0004560(molecular_function:alpha-L-fucosidase activity)	K15923	AXY8, FUC95A, afcA	map00511(Other glycan degradation)	ENOG410XPGV(S:Function unknown)	ENOG410XPGV(C6 finger domain protein)	PF14498.3(Glyco_hyd_65N_2:Glycosyl hydrolase family 65, N-terminal domain)	sp|Q8L7W8|FUCO2_ARATH(Alpha-L-fucosidase 2 OS=Arabidopsis thaliana OX=3702 GN=FUC95A PE=1 SV=1)
506075	hypothetical protein	1146	53.5	13.91	0.175468	-2.51072	0.00273167	0.0270175	yes	down	PKK42605.1(hypothetical protein CI102_13052 [Trichoderma harzianum])	GO:0005634(cellular_component:nucleus); GO:0005829(cellular_component:cytosol)				ENOG4111FQW(S:Function unknown); ENOG41119SJ(S:Function unknown)	ENOG4111FQW(WW domain binding protein 2); ENOG41119SJ(WW-domain ligand protein)	PF10349.6(WWbp:WW-domain ligand protein)
80399	hypothetical protein	2202	54.24	17.44	0.212273	-2.23601	0.00271872	0.0269856	yes	down	PKK52430.1(hypothetical protein CI102_7633 [Trichoderma harzianum])	GO:0003700(molecular_function:transcription factor activity, sequence-specific DNA binding); GO:0006355(biological_process:regulation of transcription, DNA-templated); GO:0043565(molecular_function:sequence-specific DNA binding)				COG5025(K:Transcription)	COG5025(forkhead box)	PF00250.15(Forkhead:Forkhead domain)	sp|O43058|SEP1_SCHPO(Forkhead protein sep1 OS=Schizosaccharomyces pombe (strain 972 / ATCC 24843) OX=284812 GN=sep1 PE=1 SV=1)
514132	hypothetical protein	2082	13.92	2.54	0.123688	-3.01523	0.00272409	0.0269856	yes	down	XP_024767517.1(hypothetical protein M431DRAFT_514132 [Trichoderma harzianum CBS 226.95])	GO:0016020(cellular_component:membrane)	K03457	TC.NCS1		COG1953(F:Nucleotide transport and metabolism); COG1953(H:Coenzyme transport and metabolism)	COG1953(cytosine purines, uracil, thiamine, allantoin permease); COG1953(cytosine purines, uracil, thiamine, allantoin permease)	PF02133.12(Transp_cyt_pur:Permease for cytosine/purines, uracil, thiamine, allantoin)	sp|O14035|YEME_SCHPO(Uncharacterized permease C29B12.14c OS=Schizosaccharomyces pombe (strain 972 / ATCC 24843) OX=284812 GN=SPAC29B12.14c PE=3 SV=2)
543338	hypothetical protein	1257	8.91	1.665	0.120099	-3.05771	0.00267071	0.0265783	yes	down	XP_024768987.1(hypothetical protein M431DRAFT_543338 [Trichoderma harzianum CBS 226.95])					ENOG4112CDG(S:Function unknown); ENOG4111845(S:Function unknown)	ENOG4112CDG(Chromosome 11 open reading frame 68); ENOG4111845(Domain of unknown function (DUF1917))	PF08939.7(DUF1917:Domain of unknown function (DUF1917))	sp|Q6NWH0|CK068_DANRE(UPF0696 protein C11orf68 homolog OS=Danio rerio OX=7955 GN=P5436 PE=2 SV=1)
120935	hypothetical protein	3199	2.865	0.645	0.146429	-2.77173	0.00265025	0.0264051	yes	down	XP_024771956.1(hypothetical protein M431DRAFT_120935 [Trichoderma harzianum CBS 226.95])					COG0775(F:Nucleotide transport and metabolism); COG0666(S:Function unknown)	COG0775(Catalyzes the irreversible cleavage of the glycosidic bond in both 5'-methylthioadenosine (MTA) and S- adenosylhomocysteine (SAH AdoHcy) to adenine and the corresponding thioribose, 5'-methylthioribose and S-ribosylhomocysteine, respectively (By similarity)); COG0666(Ankyrin Repeat)	PF12796.4(Ank_2:Ankyrin repeats (3 copies)); PF00023.27(Ank:Ankyrin repeat); PF13606.3(Ank_3:Ankyrin repeat); PF13637.3(Ank_4:Ankyrin repeats (many copies)); PF13857.3(Ank_5:Ankyrin repeats (many copies)); PF01048.17(PNP_UDP_1:Phosphorylase superfamily); PF05729.9(NACHT:NACHT domain)	sp|Q02357|ANK1_MOUSE(Ankyrin-1 OS=Mus musculus OX=10090 GN=Ank1 PE=1 SV=2)
494193	hypothetical protein	1245	229.58	60.82	0.183353	-2.44731	0.00260722	0.0260362	yes	down	XP_024775437.1(hypothetical protein M431DRAFT_494193 [Trichoderma harzianum CBS 226.95])					ENOG410YYX2(S:Function unknown); COG3332(S:Function unknown); ENOG4110UG5(S:Function unknown)	ENOG410YYX2(-); COG3332(Chromosome 22 open reading frame 25); ENOG4110UG5(-)
87595	hypothetical protein	855	16.56	4.055	0.152599	-2.71219	0.00259674	0.0259859	yes	down	XP_024773380.1(hypothetical protein M431DRAFT_87595, partial [Trichoderma harzianum CBS 226.95])		K11976	RNF216, TRIAD3		ENOG410XS1H(S:Function unknown)	ENOG410XS1H(Uncharacterized conserved protein (DUF2036))		sp|Q9NWF9|RN216_HUMAN(E3 ubiquitin-protein ligase RNF216 OS=Homo sapiens OX=9606 GN=RNF216 PE=1 SV=3)
86496	hypothetical protein	1500	9.88	0	0.000657135	-10.5715	0.00255869	0.0256698	yes	down	XP_024773260.1(hypothetical protein M431DRAFT_86496 [Trichoderma harzianum CBS 226.95])	GO:0015495(molecular_function:gamma-aminobutyric acid:proton symporter activity); GO:0015847(biological_process:putrescine transport); GO:0015812(biological_process:gamma-aminobutyric acid transport); GO:0003333(biological_process:amino acid transmembrane transport); GO:0000329(cellular_component:fungal-type vacuole membrane); GO:0015171(molecular_function:amino acid transmembrane transporter act…				COG0531(S:Function unknown)	COG0531(Alpha beta hydrolase fold protein)	PF13520.3(AA_permease_2:Amino acid permease); PF00324.18(AA_permease:Amino acid permease)	sp|P32837|UGA4_YEAST(GABA-specific permease OS=Saccharomyces cerevisiae (strain ATCC 204508 / S288c) OX=559292 GN=UGA4 PE=1 SV=1)
97807	hypothetical protein	855	8.86	1.805	0.131257	-2.92954	0.00254127	0.0255748	yes	down	XP_024768885.1(hypothetical protein M431DRAFT_97807 [Trichoderma harzianum CBS 226.95])	GO:0055114(biological_process:oxidation-reduction process); GO:0016491(molecular_function:oxidoreductase activity)				COG1028(S:Function unknown)	COG1028(-)	PF13561.3(adh_short_C2:Enoyl-(Acyl carrier protein) reductase); PF00106.22(adh_short:short chain dehydrogenase); PF08659.7(KR:KR domain)	sp|P50166|ARDH_CANTR(D-arabinitol 2-dehydrogenase [ribulose-forming] OS=Candida tropicalis OX=5482 GN=ARD PE=1 SV=1)
484366	hypothetical protein	1968	1.47	0.09	0.0435278	-4.52192	0.00254332	0.0255748	yes	down	XP_024771993.1(hypothetical protein M431DRAFT_484366 [Trichoderma harzianum CBS 226.95])	GO:0006355(biological_process:regulation of transcription, DNA-templated); GO:0005634(cellular_component:nucleus); GO:0006357(biological_process:regulation of transcription from RNA polymerase II promoter); GO:0008270(molecular_function:zinc ion binding); GO:0000981(molecular_function:RNA polymerase II transcription factor activity, sequence-specific DNA binding)				ENOG410Y9W2(S:Function unknown); ENOG4110UFH(S:Function unknown); ENOG410YFMG(S:Function unknown); ENOG410YBYY(S:Function unknown)	ENOG410Y9W2(-); ENOG4110UFH(GAL4); ENOG410YFMG(-); ENOG410YBYY(-)
193135	hypothetical protein	1229	2.755	0.27	0.0642316	-3.96057	0.00252182	0.0254472	yes	down	XP_024780352.1(hypothetical protein M431DRAFT_193135 [Trichoderma harzianum CBS 226.95])					ENOG4110WBC(S:Function unknown); ENOG410YRRU(S:Function unknown); ENOG410ZABN(S:Function unknown); ENOG410YHSE(S:Function unknown)	ENOG4110WBC(-); ENOG410YRRU(-); ENOG410ZABN(-); ENOG410YHSE(-)
82285	hypothetical protein	885	2.615	0.06	0.0149907	-6.05978	0.00251614	0.0254194	yes	down	XP_024775667.1(hypothetical protein M431DRAFT_82285 [Trichoderma harzianum CBS 226.95])					ENOG410YA1N(S:Function unknown); ENOG4110UXJ(S:Function unknown)	ENOG410YA1N(-); ENOG4110UXJ(short chain dehydrogenase)	PF00106.22(adh_short:short chain dehydrogenase); PF13561.3(adh_short_C2:Enoyl-(Acyl carrier protein) reductase)	sp|A2RVM0|TIC32_ARATH(Short-chain dehydrogenase TIC 32, chloroplastic OS=Arabidopsis thaliana OX=3702 GN=TIC32 PE=2 SV=1)
500893	hypothetical protein	1521	5.245	0.795	0.102705	-3.28342	0.00251259	0.0254132	yes	down	XP_024768369.1(hypothetical protein M431DRAFT_500893 [Trichoderma harzianum CBS 226.95])	GO:0005634(cellular_component:nucleus); GO:0006357(biological_process:regulation of transcription from RNA polymerase II promoter); GO:0008270(molecular_function:zinc ion binding); GO:0000981(molecular_function:RNA polymerase II transcription factor activity, sequence-specific DNA binding); GO:0003677(molecular_function:DNA binding)				ENOG410YCG2(T:Signal transduction mechanisms); ENOG4110VTP(K:Transcription)	ENOG410YCG2(Casein Kinase); ENOG4110VTP(Transcription factor)	PF04082.15(Fungal_trans:Fungal specific transcription factor domain); PF00172.15(Zn_clus:Fungal Zn(2)-Cys(6) binuclear cluster domain)
6904	hypothetical protein	1509	15.075	4.37	0.190014	-2.39582	0.00245887	0.0249573	yes	down	XP_024773040.1(hypothetical protein M431DRAFT_6904 [Trichoderma harzianum CBS 226.95])		K14819	DUSP12, YVH1		COG2453(S:Function unknown)	COG2453(C2H2 finger domain protein)	PF00782.17(DSPc:Dual specificity phosphatase, catalytic domain)	sp|Q02256|PVH1_YEAST(Tyrosine-protein phosphatase YVH1 OS=Saccharomyces cerevisiae (strain ATCC 204508 / S288c) OX=559292 GN=YVH1 PE=1 SV=1)
493534	hypothetical protein	843	236.645	79.76	0.225204	-2.1507	0.0024221	0.0246707	yes	down	XP_024776736.1(hypothetical protein M431DRAFT_493534 [Trichoderma harzianum CBS 226.95])					ENOG4111JAY(S:Function unknown)	ENOG4111JAY(GTP-binding protein EsdC)	PF16561.2(AMPK1_CBM:Glycogen recognition site of AMP-activated protein kinase)
82246	hypothetical protein	1548	3.56	0.33	0.0625037	-3.99991	0.00236823	0.0242131	yes	down	XP_024775256.1(hypothetical protein M431DRAFT_82246 [Trichoderma harzianum CBS 226.95])	GO:0016620(molecular_function:oxidoreductase activity, acting on the aldehyde or oxo group of donors, NAD or NADP as acceptor); GO:0055114(biological_process:oxidation-reduction process)				COG1012(C:Energy production and conversion)	COG1012(Dehydrogenase)	PF00171.19(Aldedh:Aldehyde dehydrogenase family)	sp|A8GBX8|BETB_SERP5(NAD/NADP-dependent betaine aldehyde dehydrogenase OS=Serratia proteamaculans (strain 568) OX=399741 GN=betB PE=3 SV=1)
540002	hypothetical protein	1077	1.985	0.045	0.0151102	-6.04833	0.00235592	0.0241384	yes	down	XP_024770808.1(hypothetical protein M431DRAFT_540002 [Trichoderma harzianum CBS 226.95])	GO:0016020(cellular_component:membrane)						PF01764.22(Lipase_3:Lipase (class 3))
14849	hypothetical protein	1886	1.22	0.045	0.0237036	-5.39875	0.00232483	0.0238763	yes	down	XP_024777997.1(hypothetical protein M431DRAFT_14849 [Trichoderma harzianum CBS 226.95])	GO:0006631(biological_process:fatty acid metabolic process); GO:0003857(molecular_function:3-hydroxyacyl-CoA dehydrogenase activity); GO:0055114(biological_process:oxidation-reduction process)				COG1250(I:Lipid transport and metabolism)	COG1250(Dehydrogenase)	PF02737.15(3HCDH_N:3-hydroxyacyl-CoA dehydrogenase, NAD binding domain); PF00725.19(3HCDH:3-hydroxyacyl-CoA dehydrogenase, C-terminal domain); PF01210.20(NAD_Gly3P_dh_N:NAD-dependent glycerol-3-phosphate dehydrogenase N-terminus); PF03446.12(NAD_binding_2:NAD binding domain of 6-phosphogluconate dehydrogenase)	sp|N4WEA4|LAM1_COCH4(3-hydroxyacyl-CoA dehydrogenase-like protein LAM1 OS=Cochliobolus heterostrophus (strain C4 / ATCC 48331 / race T) OX=665024 GN=LAM1 PE=3 SV=1)
125018	hypothetical protein	9428	2.245	0.565	0.161948	-2.62639	0.00229081	0.0235729	yes	down	XP_024769857.1(hypothetical protein M431DRAFT_125018 [Trichoderma harzianum CBS 226.95])	GO:0000723(biological_process:telomere maintenance); GO:0010212(biological_process:response to ionizing radiation); GO:0006281(biological_process:DNA repair); GO:0090399(biological_process:replicative senescence); GO:0004674(molecular_function:protein serine/threonine kinase activity); GO:0016572(biological_process:histone phosphorylation); GO:0000077(biological_process:DNA damage checkpoint)	K04728	ATM, TEL1		ENOG410XNPY(S:Function unknown); COG5647(S:Function unknown)	ENOG410XNPY(ataxia telangiectasia mutated); COG5647(ataxia telangiectasia mutated)	PF00454.24(PI3_PI4_kinase:Phosphatidylinositol 3- and 4-kinase); PF11640.5(TAN:Telomere-length maintenance and DNA damage repair); PF02259.20(FAT:FAT domain); PF02260.17(FATC:FATC domain)	sp|Q4IB89|ATM_GIBZE(Serine/threonine-protein kinase TEL1 OS=Gibberella zeae (strain PH-1 / ATCC MYA-4620 / FGSC 9075 / NRRL 31084) OX=229533 GN=TEL1 PE=3 SV=2)
82048	hypothetical protein	1623	309.92	106.08	0.229692	-2.12223	0.0022612	0.0233613	yes	down	XP_024776412.1(hypothetical protein M431DRAFT_82048 [Trichoderma harzianum CBS 226.95])	GO:0000002(biological_process:mitochondrial genome maintenance); GO:0031307(cellular_component:integral component of mitochondrial outer membrane); GO:0032865(cellular_component:ERMES complex)	K17775	MDM34, MMM2	map04139(Mitophagy - yeast)	ENOG41105GK(O:Posttranslational modification, protein turnover, chaperones)	ENOG41105GK(Component of the ERMES MDM complex, which serves as a molecular tether to connect the endoplasmic reticulum and mitochondria. Components of this complex are involved in the control of mitochondrial shape and protein biogenesis and may function in phospholipid exchange. mdm34 is required for the interaction of the ER-resident membrane protein mmm1 and the outer mitochondrial membrane-r…		sp|A4QT54|MDM34_MAGO7(Mitochondrial distribution and morphology protein 34 OS=Magnaporthe oryzae (strain 70-15 / ATCC MYA-4617 / FGSC 8958) OX=242507 GN=MDM34 PE=3 SV=2)
501474	hypothetical protein	1254	673.41	193.155	0.197384	-2.34092	0.0022367	0.0231899	yes	down	XP_024767715.1(hypothetical protein M431DRAFT_501474 [Trichoderma harzianum CBS 226.95])	GO:0016021(cellular_component:integral component of membrane)				ENOG4111H1I(S:Function unknown)	ENOG4111H1I(Conserved hypothetical, protein)
537452	hypothetical protein	2444	6.3	1.065	0.118956	-3.0715	0.00223927	0.0231899	yes	down	XP_024780232.1(hypothetical protein M431DRAFT_537452, partial [Trichoderma harzianum CBS 226.95])	GO:0005634(cellular_component:nucleus); GO:0006357(biological_process:regulation of transcription from RNA polymerase II promoter); GO:0006351(biological_process:transcription, DNA-templated); GO:0003677(molecular_function:DNA binding); GO:0000981(molecular_function:RNA polymerase II transcription factor activity, sequence-specific DNA binding); GO:0008270(molecular_function:zinc ion binding)				ENOG410YCR4(K:Transcription)	ENOG410YCR4(Fungal_trans)	PF04082.15(Fungal_trans:Fungal specific transcription factor domain); PF00172.15(Zn_clus:Fungal Zn(2)-Cys(6) binuclear cluster domain)	sp|P08657|LAC9_KLULA(Lactose regulatory protein LAC9 OS=Kluyveromyces lactis (strain ATCC 8585 / CBS 2359 / DSM 70799 / NBRC 1267 / NRRL Y-1140 / WM37) OX=284590 GN=LAC9 PE=1 SV=1)
511799	hypothetical protein	769	3.255	0	0.00602957	-7.37373	0.00223258	0.023176	yes	down	XP_024770600.1(hypothetical protein M431DRAFT_511799 [Trichoderma harzianum CBS 226.95])
497612	hypothetical protein	897	3.99	0.355	0.0595846	-4.06892	0.00215962	0.0225265	yes	down	XP_024771984.1(hypothetical protein M431DRAFT_497612 [Trichoderma harzianum CBS 226.95])	GO:0008168(molecular_function:methyltransferase activity); GO:0032259(biological_process:methylation)				ENOG410XXS8(S:Function unknown); ENOG4111ZG1(S:Function unknown)	ENOG410XXS8(methyltransferase); ENOG4111ZG1(ubiE/COQ5 methyltransferase family)	PF08241.9(Methyltransf_11:Methyltransferase domain); PF13649.3(Methyltransf_25:Methyltransferase domain); PF01209.15(Ubie_methyltran:ubiE/COQ5 methyltransferase family); PF08242.9(Methyltransf_12:Methyltransferase domain); PF13847.3(Methyltransf_31:Methyltransferase domain); PF13489.3(Methyltransf_23:Methyltransferase domain)	sp|Q4WQZ0|TPCH_ASPFU(Methyltransferase tpcH OS=Neosartorya fumigata (strain ATCC MYA-4609 / Af293 / CBS 101355 / FGSC A1100) OX=330879 GN=tpcH PE=2 SV=2)
499291	hypothetical protein	1143	55.475	17.24	0.20438	-2.29067	0.00214088	0.022412	yes	down	XP_024770151.1(hypothetical protein M431DRAFT_499291 [Trichoderma harzianum CBS 226.95])	GO:0000122(biological_process:negative regulation of transcription from RNA polymerase II promoter); GO:0006875(biological_process:cellular metal ion homeostasis); GO:0000079(biological_process:regulation of cyclin-dependent protein serine/threonine kinase activity); GO:0045936(biological_process:negative regulation of phosphate metabolic process); GO:0050849(biological_process:negative regulatio…				ENOG4111TTK(S:Function unknown)	ENOG4111TTK(Armadillo repeat containing 8)	PF08613.8(Cyclin:Cyclin)	sp|Q06712|PREG_NEUCR(Nuc-1 negative regulatory protein preg OS=Neurospora crassa (strain ATCC 24698 / 74-OR23-1A / CBS 708.71 / DSM 1257 / FGSC 987) OX=367110 GN=preg PE=1 SV=1)
512263	hypothetical protein	1893	467.375	144.16	0.209311	-2.25628	0.00210855	0.0221552	yes	down	XP_024769711.1(hypothetical protein M431DRAFT_512263 [Trichoderma harzianum CBS 226.95])	GO:0016311(biological_process:dephosphorylation); GO:0046835(biological_process:carbohydrate phosphorylation); GO:0004331(molecular_function:fructose-2,6-bisphosphate 2-phosphatase activity); GO:0003873(molecular_function:6-phosphofructo-2-kinase activity); GO:0006006(biological_process:glucose metabolic process); GO:0006000(biological_process:fructose metabolic process); GO:0005524(molecular_fun…	K19029	PFKFB2	map00051(Fructose and mannose metabolism)	COG0406(S:Function unknown)	COG0406(-)	PF01591.15(6PF2K:6-phosphofructo-2-kinase); PF00300.19(His_Phos_1:Histidine phosphatase superfamily (branch 1)); PF13671.3(AAA_33:AAA domain); PF08433.7(KTI12:Chromatin associated protein KTI12)	sp|P32604|F26_YEAST(Fructose-2,6-bisphosphatase OS=Saccharomyces cerevisiae (strain ATCC 204508 / S288c) OX=559292 GN=FBP26 PE=1 SV=2)
42690	hypothetical protein	660	10.25	0.995	0.068606	-3.86552	0.00210655	0.0221552	yes	down	XP_024779097.1(hypothetical protein M431DRAFT_42690, partial [Trichoderma harzianum CBS 226.95])	GO:0031083(cellular_component:BLOC-1 complex)	K20185	BLOC1S1		ENOG411257D(S:Function unknown); COG4886(S:Function unknown)	ENOG411257D(conserved hypothetical protein); COG4886(conserved hypothetical protein)	PF06320.10(GCN5L1:GCN5-like protein 1 (GCN5L1))
131108	lytic polysaccharide monooxygenase	1297	1.825	0.11	0.0387938	-4.68803	0.00210868	0.0221552	yes	down	XP_024780096.1(lytic polysaccharide monooxygenase [Trichoderma harzianum CBS 226.95])	GO:0016787(molecular_function:hydrolase activity)				ENOG410XPS6(S:Function unknown)	ENOG410XPS6(glycoside hydrolase family 61 protein)	PF03443.11(Glyco_hydro_61:Glycosyl hydrolase family 61)	sp|Q96WQ9|EGLD_ASPKW(Probable endo-beta-1,4-glucanase D OS=Aspergillus kawachii (strain NBRC 4308) OX=1033177 GN=eglD PE=3 SV=1)
263352	hypothetical protein	1429	0.93	0	0.00843683	-6.88908	0.00208879	0.0220263	yes	down	XP_024769915.1(hypothetical protein M431DRAFT_263352 [Trichoderma harzianum CBS 226.95])	GO:0005488(molecular_function:binding)				ENOG410XU5B(S:Function unknown); ENOG4112AYF(S:Function unknown); ENOG410YBYZ(S:Function unknown); ENOG410YBN8(S:Function unknown); ENOG4110VGF(S:Function unknown); ENOG4111FCW(S:Function unknown); COG5048(S:Function unknown)	ENOG410XU5B(Fungal specific transcription factor domain); ENOG4112AYF(Fungal specific transcription factor domain); ENOG410YBYZ(Fungal specific transcription factor domain); ENOG410YBN8(C6 zinc finger protein); ENOG4110VGF(C6 zinc finger protein); ENOG4111FCW(C2H2 transcription factor); COG5048(C2H2 type zinc finger domain-containing protein)	PF00096.23(zf-C2H2:Zinc finger, C2H2 type); PF00172.15(Zn_clus:Fungal Zn(2)-Cys(6) binuclear cluster domain); PF12874.4(zf-met:Zinc-finger of C2H2 type); PF13912.3(zf-C2H2_6:C2H2-type zinc finger); PF13894.3(zf-C2H2_4:C2H2-type zinc finger); PF12171.5(zf-C2H2_jaz:Zinc-finger double-stranded RNA-binding); PF13465.3(zf-H2C2_2:Zinc-finger double domain)	sp|Q5AF56|ADR1_CANAL(Transcriptional regulator ADR1 OS=Candida albicans (strain SC5314 / ATCC MYA-2876) OX=237561 GN=ADR1 PE=2 SV=2)
503387	hypothetical protein	2420	22.26	6.76	0.20767	-2.26764	0.00207804	0.0219396	yes	down	PKK43872.1(hypothetical protein CI102_12358 [Trichoderma harzianum])	GO:0005634(cellular_component:nucleus); GO:0006357(biological_process:regulation of transcription from RNA polymerase II promoter); GO:0006351(biological_process:transcription, DNA-templated); GO:0003677(molecular_function:DNA binding); GO:0000981(molecular_function:RNA polymerase II transcription factor activity, sequence-specific DNA binding); GO:0008270(molecular_function:zinc ion binding)				ENOG41102ZY(S:Function unknown); ENOG4111TQB(S:Function unknown)	ENOG41102ZY(transcription factor); ENOG4111TQB(Fungal specific transcription factor domain)	PF04082.15(Fungal_trans:Fungal specific transcription factor domain)	sp|Q09922|YAKB_SCHPO(Uncharacterized transcriptional regulatory protein C1F7.11c OS=Schizosaccharomyces pombe (strain 972 / ATCC 24843) OX=284812 GN=SPAC1F7.11c PE=4 SV=1)
112709	hypothetical protein	1249	1142.56	297.72	0.179318	-2.47941	0.00207309	0.0219141	yes	down	XP_024776764.1(hypothetical protein M431DRAFT_112709 [Trichoderma harzianum CBS 226.95])	GO:0008152(biological_process:metabolic process); GO:0051287(molecular_function:NAD binding); GO:0016616(molecular_function:oxidoreductase activity, acting on the CH-OH group of donors, NAD or NADP as acceptor); GO:0055114(biological_process:oxidation-reduction process)				COG1052(C:Energy production and conversion)	COG1052(Dehydrogenase)	PF02826.16(2-Hacid_dh_C:D-isomer specific 2-hydroxyacid dehydrogenase, NAD binding domain); PF00389.27(2-Hacid_dh:D-isomer specific 2-hydroxyacid dehydrogenase, catalytic domain); PF03446.12(NAD_binding_2:NAD binding domain of 6-phosphogluconate dehydrogenase)	sp|O94574|YGDH_SCHPO(Putative 2-hydroxyacid dehydrogenase C1773.17c OS=Schizosaccharomyces pombe (strain 972 / ATCC 24843) OX=284812 GN=SPBC1773.17c PE=3 SV=3)
1003	hypothetical protein	2682	364.595	97.07	0.1805	-2.46993	0.00206402	0.0218449	yes	down	XP_024780730.1(hypothetical protein M431DRAFT_1003 [Trichoderma harzianum CBS 226.95])	GO:0055114(biological_process:oxidation-reduction process); GO:0016491(molecular_function:oxidoreductase activity)	K14729	FOX2		COG2030(I:Lipid transport and metabolism)	COG2030(maoc domain protein dehydratase)	PF00106.22(adh_short:short chain dehydrogenase); PF13561.3(adh_short_C2:Enoyl-(Acyl carrier protein) reductase); PF01575.16(MaoC_dehydratas:MaoC like domain); PF08659.7(KR:KR domain)	sp|Q01373|FOX2_NEUCR(Peroxisomal hydratase-dehydrogenase-epimerase OS=Neurospora crassa (strain ATCC 24698 / 74-OR23-1A / CBS 708.71 / DSM 1257 / FGSC 987) OX=367110 GN=fox-2 PE=1 SV=1)
87983	hypothetical protein	1740	29.44	6.265	0.137162	-2.86605	0.00206391	0.0218449	yes	down	XP_024773841.1(hypothetical protein M431DRAFT_87983 [Trichoderma harzianum CBS 226.95])	GO:0005488(molecular_function:binding)				ENOG410Y3CV(S:Function unknown); ENOG41114FU(S:Function unknown)	ENOG410Y3CV(Protein of unknown function (DUF3074)); ENOG41114FU(-)	PF11274.5(DUF3074:Protein of unknown function (DUF3074))
496062	hypothetical protein	2199	188.42	103.545	0.3647	-1.45522	0.00394675	0.0216306	yes	down	XP_024773785.1(hypothetical protein M431DRAFT_496062 [Trichoderma harzianum CBS 226.95])	GO:0006355(biological_process:regulation of transcription, DNA-templated); GO:0005634(cellular_component:nucleus); GO:0046872(molecular_function:metal ion binding); GO:0003676(molecular_function:nucleic acid binding); GO:0003677(molecular_function:DNA binding)				ENOG410YYCN(K:Transcription)	ENOG410YYCN(Zinc finger transcription factor)		sp|Q9P8W3|ACE1_HYPJE(Zinc finger transcription factor ace1 OS=Hypocrea jecorina OX=51453 GN=ace1 PE=4 SV=1)
507253	glycoside hydrolase family 43 protein	1899	3.83	0.585	0.10622	-3.23487	0.00199576	0.0213045	yes	down	XP_024775258.1(glycoside hydrolase family 43 protein [Trichoderma harzianum CBS 226.95])	GO:0005975(biological_process:carbohydrate metabolic process); GO:0004553(molecular_function:hydrolase activity, hydrolyzing O-glycosyl compounds)	K01198	xynB	map00500(Starch and sucrose metabolism); map00520(Amino sugar and nucleotide sugar metabolism)	COG3507(G:Carbohydrate transport and metabolism)	COG3507(hydrolase family 43)	PF04616.11(Glyco_hydro_43:Glycosyl hydrolases family 43)	sp|P94489|XYNB_BACSU(Beta-xylosidase OS=Bacillus subtilis (strain 168) OX=224308 GN=xynB PE=1 SV=2)
9281	hypothetical protein	1689	103.81	30.81	0.193947	-2.36626	0.00197456	0.0211042	yes	down	XP_024770288.1(hypothetical protein M431DRAFT_9281 [Trichoderma harzianum CBS 226.95])	GO:0043547(biological_process:positive regulation of GTPase activity); GO:0032045(cellular_component:guanyl-nucleotide exchange factor complex); GO:0005851(cellular_component:eukaryotic translation initiation factor 2B complex); GO:0006446(biological_process:regulation of translational initiation); GO:0005085(molecular_function:guanyl-nucleotide exchange factor activity); GO:0003743(molecular_fun…	K03241	EIF2B3	map03013(RNA transport)	COG1208(S:Function unknown)	COG1208(ZnF_C2H2)	PF00132.21(Hexapep:Bacterial transferase hexapeptide (six repeats)); PF12804.4(NTP_transf_3:MobA-like NTP transferase domain)	sp|P56288|EI2BG_SCHPO(Probable translation initiation factor eIF-2B subunit gamma OS=Schizosaccharomyces pombe (strain 972 / ATCC 24843) OX=284812 GN=tif223 PE=1 SV=2)
88500	hypothetical protein	1269	10.665	2.3	0.137729	-2.8601	0.0019655	0.0210333	yes	down	XP_024772760.1(hypothetical protein M431DRAFT_88500 [Trichoderma harzianum CBS 226.95])					ENOG410ZXZ3(U:Intracellular trafficking, secretion, and vesicular transport); ENOG410YYSQ(U:Intracellular trafficking, secretion, and vesicular transport); ENOG410YFTW(S:Function unknown)	ENOG410ZXZ3(MFS multidrug transporter); ENOG410YYSQ(MFS multidrug transporter); ENOG410YFTW(-)	PF11951.5(Fungal_trans_2:Fungal specific transcription factor domain)
82190	hypothetical protein	786	141.085	46.385	0.220508	-2.18109	0.00195106	0.0209305	yes	down	XP_024776404.1(hypothetical protein M431DRAFT_82190 [Trichoderma harzianum CBS 226.95])					ENOG410XZNR(S:Function unknown); ENOG4110V8V(S:Function unknown)	ENOG410XZNR(-); ENOG4110V8V(-)	PF12855.4(Ecl1:Life-span regulatory factor)
99323	hypothetical protein	1491	50.195	15.3	0.199477	-2.3257	0.00194653	0.0209305	yes	down	XP_024768389.1(hypothetical protein M431DRAFT_99323 [Trichoderma harzianum CBS 226.95])	GO:0016020(cellular_component:membrane)				ENOG4111DMC(S:Function unknown); ENOG410YE45(S:Function unknown)	ENOG4111DMC(-); ENOG410YE45(Fungal specific transcription factor domain)
151717	hypothetical protein	2791	414.1	100.76	0.166041	-2.59039	0.00195079	0.0209305	yes	down	XP_024770183.1(hypothetical protein M431DRAFT_151717 [Trichoderma harzianum CBS 226.95])	GO:0003824(molecular_function:catalytic activity); GO:0008152(biological_process:metabolic process)	K01897	ACSL, fadD	map00061(Fatty acid biosynthesis); map00071(Fatty acid degradation); map04146(Peroxisome)	COG1022(S:Function unknown)	COG1022(Membrane-associating domain)	PF00501.25(AMP-binding:AMP-binding enzyme)	sp|Q8LKS5|LACS7_ARATH(Long chain acyl-CoA synthetase 7, peroxisomal OS=Arabidopsis thaliana OX=3702 GN=LACS7 PE=1 SV=2)
100546	hypothetical protein	1674	4.41	0.94	0.129545	-2.94848	0.0019334	0.0208962	yes	down	XP_024767839.1(hypothetical protein M431DRAFT_100546 [Trichoderma harzianum CBS 226.95])	GO:0005634(cellular_component:nucleus); GO:0006281(biological_process:DNA repair); GO:0008081(molecular_function:phosphoric diester hydrolase activity)				ENOG4111C97(S:Function unknown)	ENOG4111C97(tyrosyl-DNA phosphodiesterase domain-containing protein)	PF06087.9(Tyr-DNA_phospho:Tyrosyl-DNA phosphodiesterase)	sp|Q9NUW8|TYDP1_HUMAN(Tyrosyl-DNA phosphodiesterase 1 OS=Homo sapiens OX=9606 GN=TDP1 PE=1 SV=2)
481123	hypothetical protein	1626	962.86	224.14	0.159183	-2.65124	0.00192954	0.0208886	yes	down	XP_024775285.1(hypothetical protein M431DRAFT_481123 [Trichoderma harzianum CBS 226.95])	GO:0003995(molecular_function:acyl-CoA dehydrogenase activity); GO:0050660(molecular_function:flavin adenine dinucleotide binding); GO:0055114(biological_process:oxidation-reduction process)				COG1960(L:Replication, recombination and repair)	COG1960(atp-dependent rna helicase)	PF00441.21(Acyl-CoA_dh_1:Acyl-CoA dehydrogenase, C-terminal domain); PF02770.16(Acyl-CoA_dh_M:Acyl-CoA dehydrogenase, middle domain); PF00173.25(Cyt-b5:Cytochrome b5-like Heme/Steroid binding domain); PF02771.13(Acyl-CoA_dh_N:Acyl-CoA dehydrogenase, N-terminal domain); PF08028.8(Acyl-CoA_dh_2:Acyl-CoA dehydrogenase, C-terminal domain)	sp|Q5ATG5|APDG_EMENI(Acyl-CoA dehydrogenase apdG OS=Emericella nidulans (strain FGSC A4 / ATCC 38163 / CBS 112.46 / NRRL 194 / M139) OX=227321 GN=apdG PE=2 SV=1)
16486	hypothetical protein	2985	2.49	0.335	0.0869518	-3.52364	0.00193029	0.0208886	yes	down	XP_024774181.1(hypothetical protein M431DRAFT_16486 [Trichoderma harzianum CBS 226.95])					COG0666(S:Function unknown); COG0775(F:Nucleotide transport and metabolism); ENOG4111JDG(S:Function unknown)	COG0666(Ankyrin Repeat); COG0775(Catalyzes the irreversible cleavage of the glycosidic bond in both 5'-methylthioadenosine (MTA) and S- adenosylhomocysteine (SAH AdoHcy) to adenine and the corresponding thioribose, 5'-methylthioribose and S-ribosylhomocysteine, respectively (By similarity)); ENOG4111JDG(ankyrin repeat domain 33B)	PF12796.4(Ank_2:Ankyrin repeats (3 copies)); PF13606.3(Ank_3:Ankyrin repeat); PF00023.27(Ank:Ankyrin repeat); PF13637.3(Ank_4:Ankyrin repeats (many copies)); PF13857.3(Ank_5:Ankyrin repeats (many copies)); PF01048.17(PNP_UDP_1:Phosphorylase superfamily)	sp|O75179|ANR17_HUMAN(Ankyrin repeat domain-containing protein 17 OS=Homo sapiens OX=9606 GN=ANKRD17 PE=1 SV=3)
408759	hypothetical protein	1242	11.905	2.755	0.168984	-2.56504	0.00191739	0.020827	yes	down	XP_024775463.1(hypothetical protein M431DRAFT_408759 [Trichoderma harzianum CBS 226.95])					ENOG4111EGU(S:Function unknown); ENOG410YD02(S:Function unknown); ENOG4111527(S:Function unknown); ENOG4111JDI(S:Function unknown); ENOG4111BZH(S:Function unknown)	ENOG4111EGU(-); ENOG410YD02(Methyltransferase domain); ENOG4111527(Methyltransferase domain); ENOG4111JDI(-); ENOG4111BZH(Methyltransferase)	PF13489.3(Methyltransf_23:Methyltransferase domain); PF13649.3(Methyltransf_25:Methyltransferase domain); PF08241.9(Methyltransf_11:Methyltransferase domain); PF13847.3(Methyltransf_31:Methyltransferase domain); PF08242.9(Methyltransf_12:Methyltransferase domain); PF05175.11(MTS:Methyltransferase small domain); PF01728.16(FtsJ:FtsJ-like methyltransferase); PF02353.17(CMAS:Mycolic acid cyclopropan…	sp|M2SNN6|LAEA_COCH5(Secondary metabolism regulator LAE1 OS=Cochliobolus heterostrophus (strain C5 / ATCC 48332 / race O) OX=701091 GN=LAE1 PE=3 SV=1)
85636	hypothetical protein	1158	1.385	0	0.00726361	-7.1051	0.00190778	0.0207747	yes	down	XP_024774093.1(hypothetical protein M431DRAFT_85636 [Trichoderma harzianum CBS 226.95])					ENOG410Y89X(S:Function unknown)	ENOG410Y89X(-)	PF01636.20(APH:Phosphotransferase enzyme family); PF01633.17(Choline_kinase:Choline/ethanolamine kinase); PF02958.17(EcKinase:Ecdysteroid kinase)
324892	hypothetical protein	890	28.415	7.505	0.180577	-2.46931	0.00189844	0.0207251	yes	down	XP_024768195.1(hypothetical protein M431DRAFT_324892 [Trichoderma harzianum CBS 226.95])
531915	multicopper oxidase	1757	1.305	0.025	0.0122145	-6.35526	0.00189675	0.0207251	yes	down	PKK53426.1(hypothetical protein CI102_1888, partial [Trichoderma harzianum])	GO:0046872(molecular_function:metal ion binding); GO:0005507(molecular_function:copper ion binding); GO:0055114(biological_process:oxidation-reduction process); GO:0016491(molecular_function:oxidoreductase activity)				COG2132(S:Function unknown)	COG2132(-)	PF07732.12(Cu-oxidase_3:Multicopper oxidase); PF07731.11(Cu-oxidase_2:Multicopper oxidase); PF00394.19(Cu-oxidase:Multicopper oxidase)	sp|E9RBR0|ABR2_ASPFU(Laccase abr2 OS=Neosartorya fumigata (strain ATCC MYA-4609 / Af293 / CBS 101355 / FGSC A1100) OX=330879 GN=abr2 PE=1 SV=1)
149523	hypothetical protein	2061	803.905	251.07	0.211467	-2.2415	0.00188892	0.0206993	yes	down	XP_024771602.1(hypothetical protein M431DRAFT_149523 [Trichoderma harzianum CBS 226.95])	GO:0004252(molecular_function:serine-type endopeptidase activity); GO:0006508(biological_process:proteolysis)	K01336	E3.4.21.48	map04138(Autophagy - yeast)	COG1404(S:Function unknown)	COG1404(beige BEACH domain containing protein)	PF00082.19(Peptidase_S8:Subtilase family); PF05922.13(Inhibitor_I9:Peptidase inhibitor I9)	sp|P58371|SPM1_MAGO7(Subtilisin-like proteinase Spm1 OS=Magnaporthe oryzae (strain 70-15 / ATCC MYA-4617 / FGSC 8958) OX=242507 GN=SPM1 PE=3 SV=1)
95431	hypothetical protein	2160	76.305	16.63	0.145843	-2.77752	0.00188261	0.0206563	yes	down	XP_024770295.1(hypothetical protein M431DRAFT_95431 [Trichoderma harzianum CBS 226.95])	GO:0016787(molecular_function:hydrolase activity); GO:0008152(biological_process:metabolic process)				COG0657(S:Function unknown)	COG0657(Autophagy protein Atg27)	PF07859.10(Abhydrolase_3:alpha/beta hydrolase fold)	sp|Q68J42|LIPS_PIG(Hormone-sensitive lipase OS=Sus scrofa OX=9823 GN=LIPE PE=2 SV=1)
500930	hypothetical protein	3330	2.525	0.47	0.120646	-3.05114	0.00186411	0.0204792	yes	down	XP_024768410.1(hypothetical protein M431DRAFT_500930 [Trichoderma harzianum CBS 226.95])	GO:0016787(molecular_function:hydrolase activity); GO:0000166(molecular_function:nucleotide binding); GO:0016021(cellular_component:integral component of membrane); GO:0016020(cellular_component:membrane); GO:0070588(biological_process:calcium ion transmembrane transport); GO:0006816(biological_process:calcium ion transport); GO:0043167(molecular_function:ion binding); GO:0005388(molecular_functi…	K01537	E3.6.3.8		ENOG410XNNC(S:Function unknown)	ENOG410XNNC(PfpI family)	PF00689.18(Cation_ATPase_C:Cation transporting ATPase, C-terminus); PF00122.17(E1-E2_ATPase:E1-E2 ATPase); PF13246.3(Cation_ATPase:Cation transport ATPase (P-type)); PF00702.23(Hydrolase:haloacid dehalogenase-like hydrolase); PF00690.23(Cation_ATPase_N:Cation transporter/ATPase, N-terminus); PF08282.9(Hydrolase_3:haloacid dehalogenase-like hydrolase)	sp|Q9HDW7|ATC2_SCHPO(Calcium-transporting ATPase 2 OS=Schizosaccharomyces pombe (strain 972 / ATCC 24843) OX=284812 GN=pmc1 PE=3 SV=1)
79128	glycoside hydrolase family 26 protein	1077	12.725	2.195	0.12126	-3.04382	0.00185979	0.0204577	yes	down	XP_024778110.1(glycoside hydrolase family 26 protein [Trichoderma harzianum CBS 226.95])	GO:0005975(biological_process:carbohydrate metabolic process); GO:0016798(molecular_function:hydrolase activity, acting on glycosyl bonds); GO:0008152(biological_process:metabolic process); GO:0004553(molecular_function:hydrolase activity, hydrolyzing O-glycosyl compounds)				ENOG4111KTS(G:Carbohydrate transport and metabolism)	ENOG4111KTS(Glycoside hydrolase family 26 protein)	PF02156.12(Glyco_hydro_26:Glycosyl hydrolase family 26)
97148	hypothetical protein	1374	35.78	10.98	0.204706	-2.28837	0.00185028	0.0204048	yes	down	XP_024769243.1(hypothetical protein M431DRAFT_97148 [Trichoderma harzianum CBS 226.95])					ENOG41124T0(S:Function unknown); ENOG410Z24U(S:Function unknown)	ENOG41124T0(-); ENOG410Z24U(-)
2414	hypothetical protein	1959	2.55	0.36	0.0966933	-3.37044	0.00183015	0.0202687	yes	down	XP_024776943.1(hypothetical protein M431DRAFT_2414 [Trichoderma harzianum CBS 226.95])					ENOG4111A6R(S:Function unknown)	ENOG4111A6R(-)
476716	hypothetical protein	1689	1.73	0.085	0.0326541	-4.93659	0.00183152	0.0202687	yes	down	XP_024779873.1(hypothetical protein M431DRAFT_476716 [Trichoderma harzianum CBS 226.95])					ENOG410XNP8(S:Function unknown); ENOG410ZXW4(S:Function unknown); ENOG410XP3K(S:Function unknown); ENOG410ZVNM(S:Function unknown); COG1409(S:Function unknown); ENOG410XRWX(S:Function unknown)	ENOG410XNP8(U4 u6 small nuclear ribonucleoprotein); ENOG410ZXW4(WD domain, G-beta repeat); ENOG410XP3K(WD domain, G-beta repeat); ENOG410ZVNM(WD40); COG1409(WD40); ENOG410XRWX(F-box and WD repeat domain containing 7, E3 ubiquitin protein ligase)	PF00400.29(WD40:WD domain, G-beta repeat); PF12894.4(ANAPC4_WD40:Anaphase-promoting complex subunit 4 WD40 domain); PF11715.5(Nup160:Nucleoporin Nup120/160); PF13860.3(FlgD_ig:FlgD Ig-like domain)	sp|Q00808|HETE1_PODAS(Vegetative incompatibility protein HET-E-1 OS=Podospora anserina OX=5145 GN=HET-E1 PE=4 SV=1)
126259	hypothetical protein	2933	7.42	1.97	0.175592	-2.5097	0.00182263	0.0202286	yes	down	PKK51034.1(hypothetical protein CI102_2938 [Trichoderma harzianum])	GO:0006310(biological_process:DNA recombination); GO:0071897(biological_process:DNA biosynthetic process); GO:0016021(cellular_component:integral component of membrane); GO:0051103(biological_process:DNA ligation involved in DNA repair); GO:0006260(biological_process:DNA replication); GO:0003910(molecular_function:DNA ligase (ATP) activity); GO:0003677(molecular_function:DNA binding); GO:0030001(…	K10777	LIG4, DNL4	map03450(Non-homologous end-joining)	COG1793(S:Function unknown)	COG1793(Putative amidoligase enzyme)	PF01068.18(DNA_ligase_A_M:ATP dependent DNA ligase domain); PF04675.11(DNA_ligase_A_N:DNA ligase N terminus); PF16589.2(BRCT_2:BRCT domain, a BRCA1 C-terminus domain); PF09414.7(RNA_ligase:RNA ligase); PF04679.12(DNA_ligase_A_C:ATP dependent DNA ligase C terminal region); PF00533.23(BRCT:BRCA1 C Terminus (BRCT) domain); PF16759.2(LIG3_BRCT:DNA ligase 3 BRCT domain); PF11411.5(DNA_ligase_IV:DNA li…	sp|Q7SB49|DNLI4_NEUCR(DNA ligase 4 OS=Neurospora crassa (strain ATCC 24698 / 74-OR23-1A / CBS 708.71 / DSM 1257 / FGSC 987) OX=367110 GN=mus-53 PE=3 SV=2)
[truncated: 561 more rows]
